# Supplementary material for: Genome-wide analysis of small RNAs reveals eight fiber elongation-related and 257 novel microRNAs in elongating cotton fiber cells
Source: PubMed Central journal article supplement (PMC3849097; doi:10.1186/1471-2164-14-629), 2013-09-17
Supplement: 1471-2164-14-629-S3.pdf [file 1471-2164-14-629-S3.pdf]

**Additional Figure S1:**

**The 139 novel stem-loop structures of known miRNA precursors in elongating cotton fibers.** In most cases, the red highlighting indicates the miRNA sequence and the blue highlighting indicates the miRNA\* sequence. For example, in ‘17-MIR159-[hbr-MIR159a MI0022053]’, the ‘17’ came from the “index” column in the additional file 2; “MIR159” came from the “name” column in the additional file 2; and [hbr-MIR159a MI0022053] was the homolog of the precursor in miRBase. *tcc*: *Theobroma cacao*; *ctr*: *Citrus trifoliata*; *hbr*: *Hevea brasiliensis*; *vvi*: *Vitis vinifera*; *ptc*: *Populus trichocarpa*; *mdm*: *Malus domestica*.

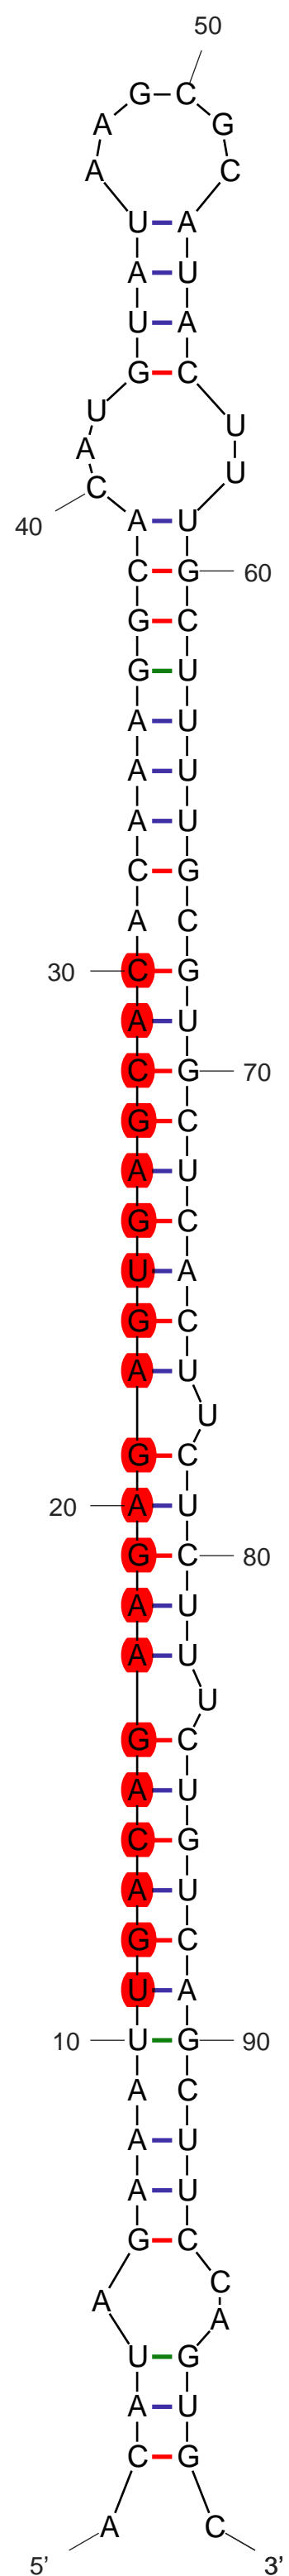

*dG = -47.60 [Initially -47.60] 3-MIR156-[tcc-MIR156g MI0017459]*

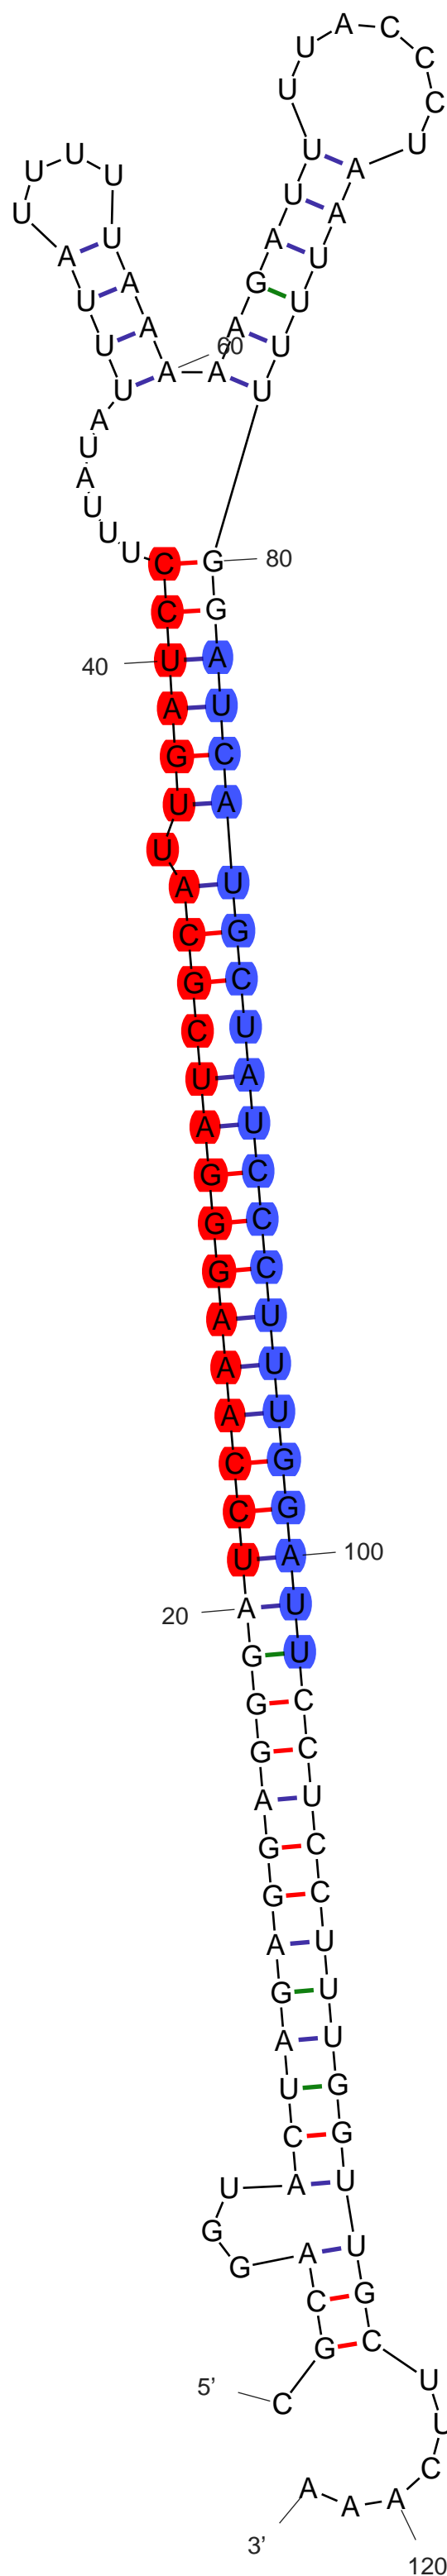

$dG = -54.20$  [Initially  $-56.10$ ] 100-MIR393



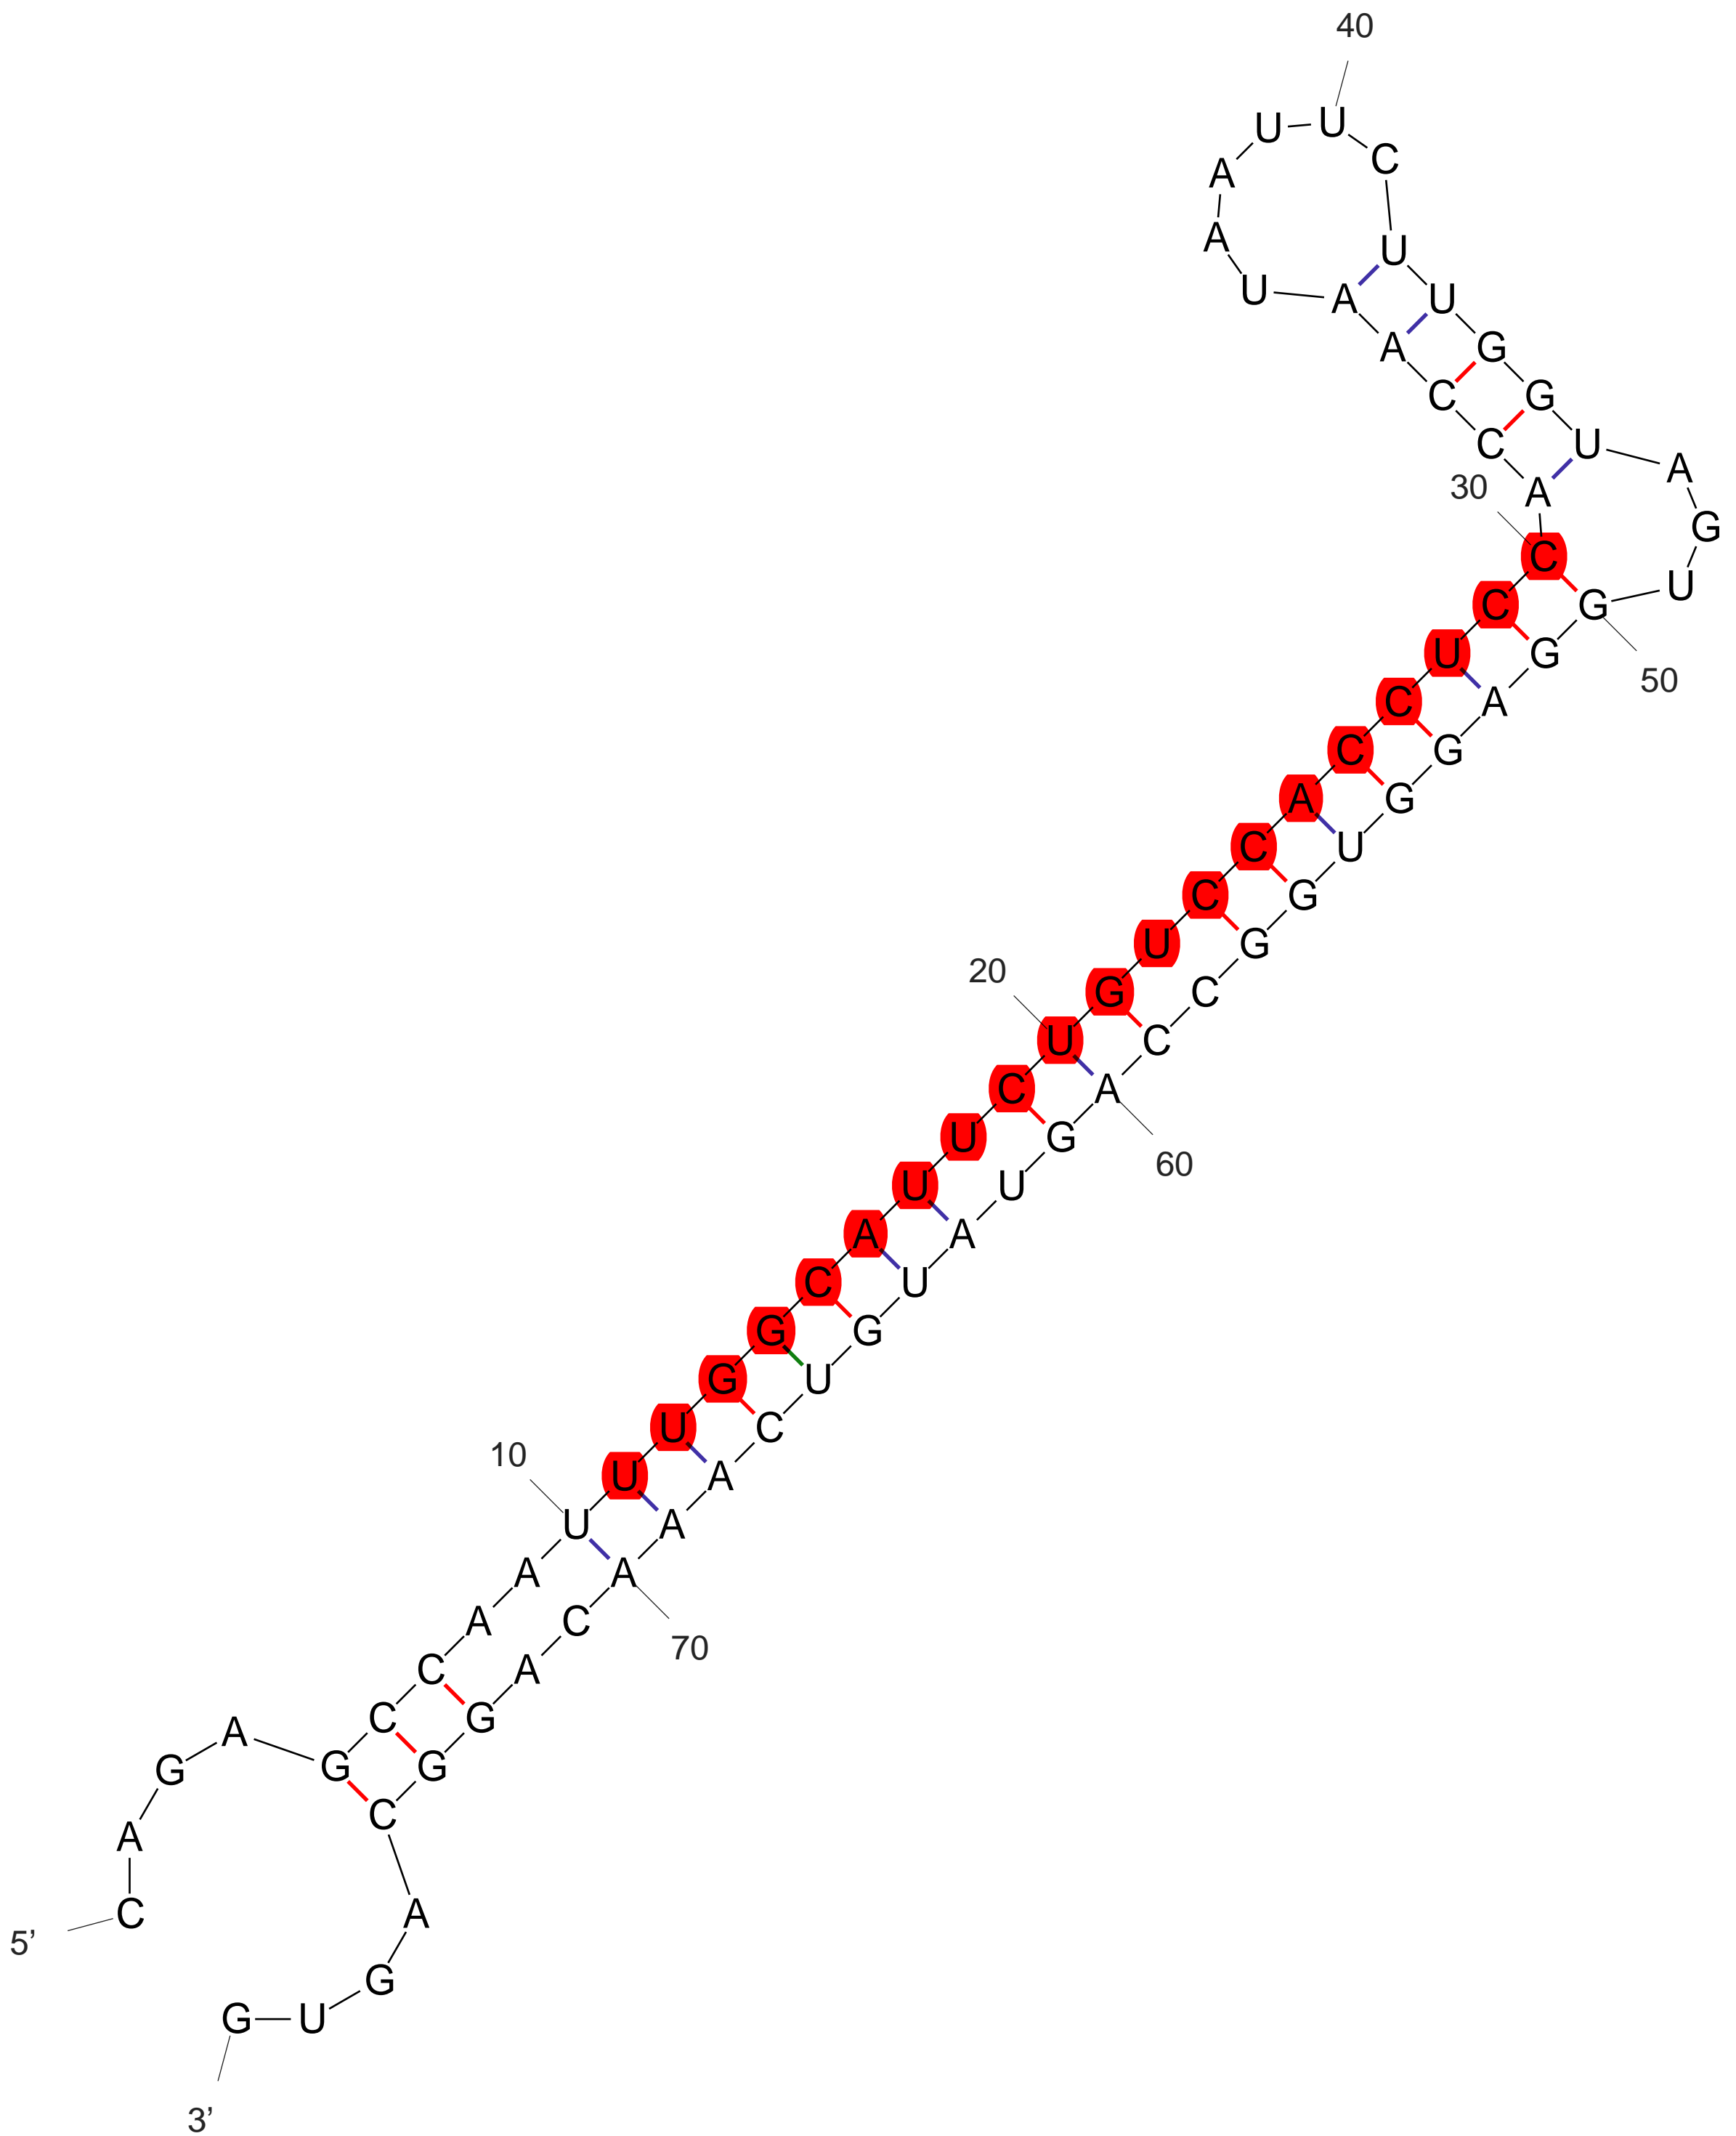

*dG = -39.00 [Initially -39.00] 103-MIR394*

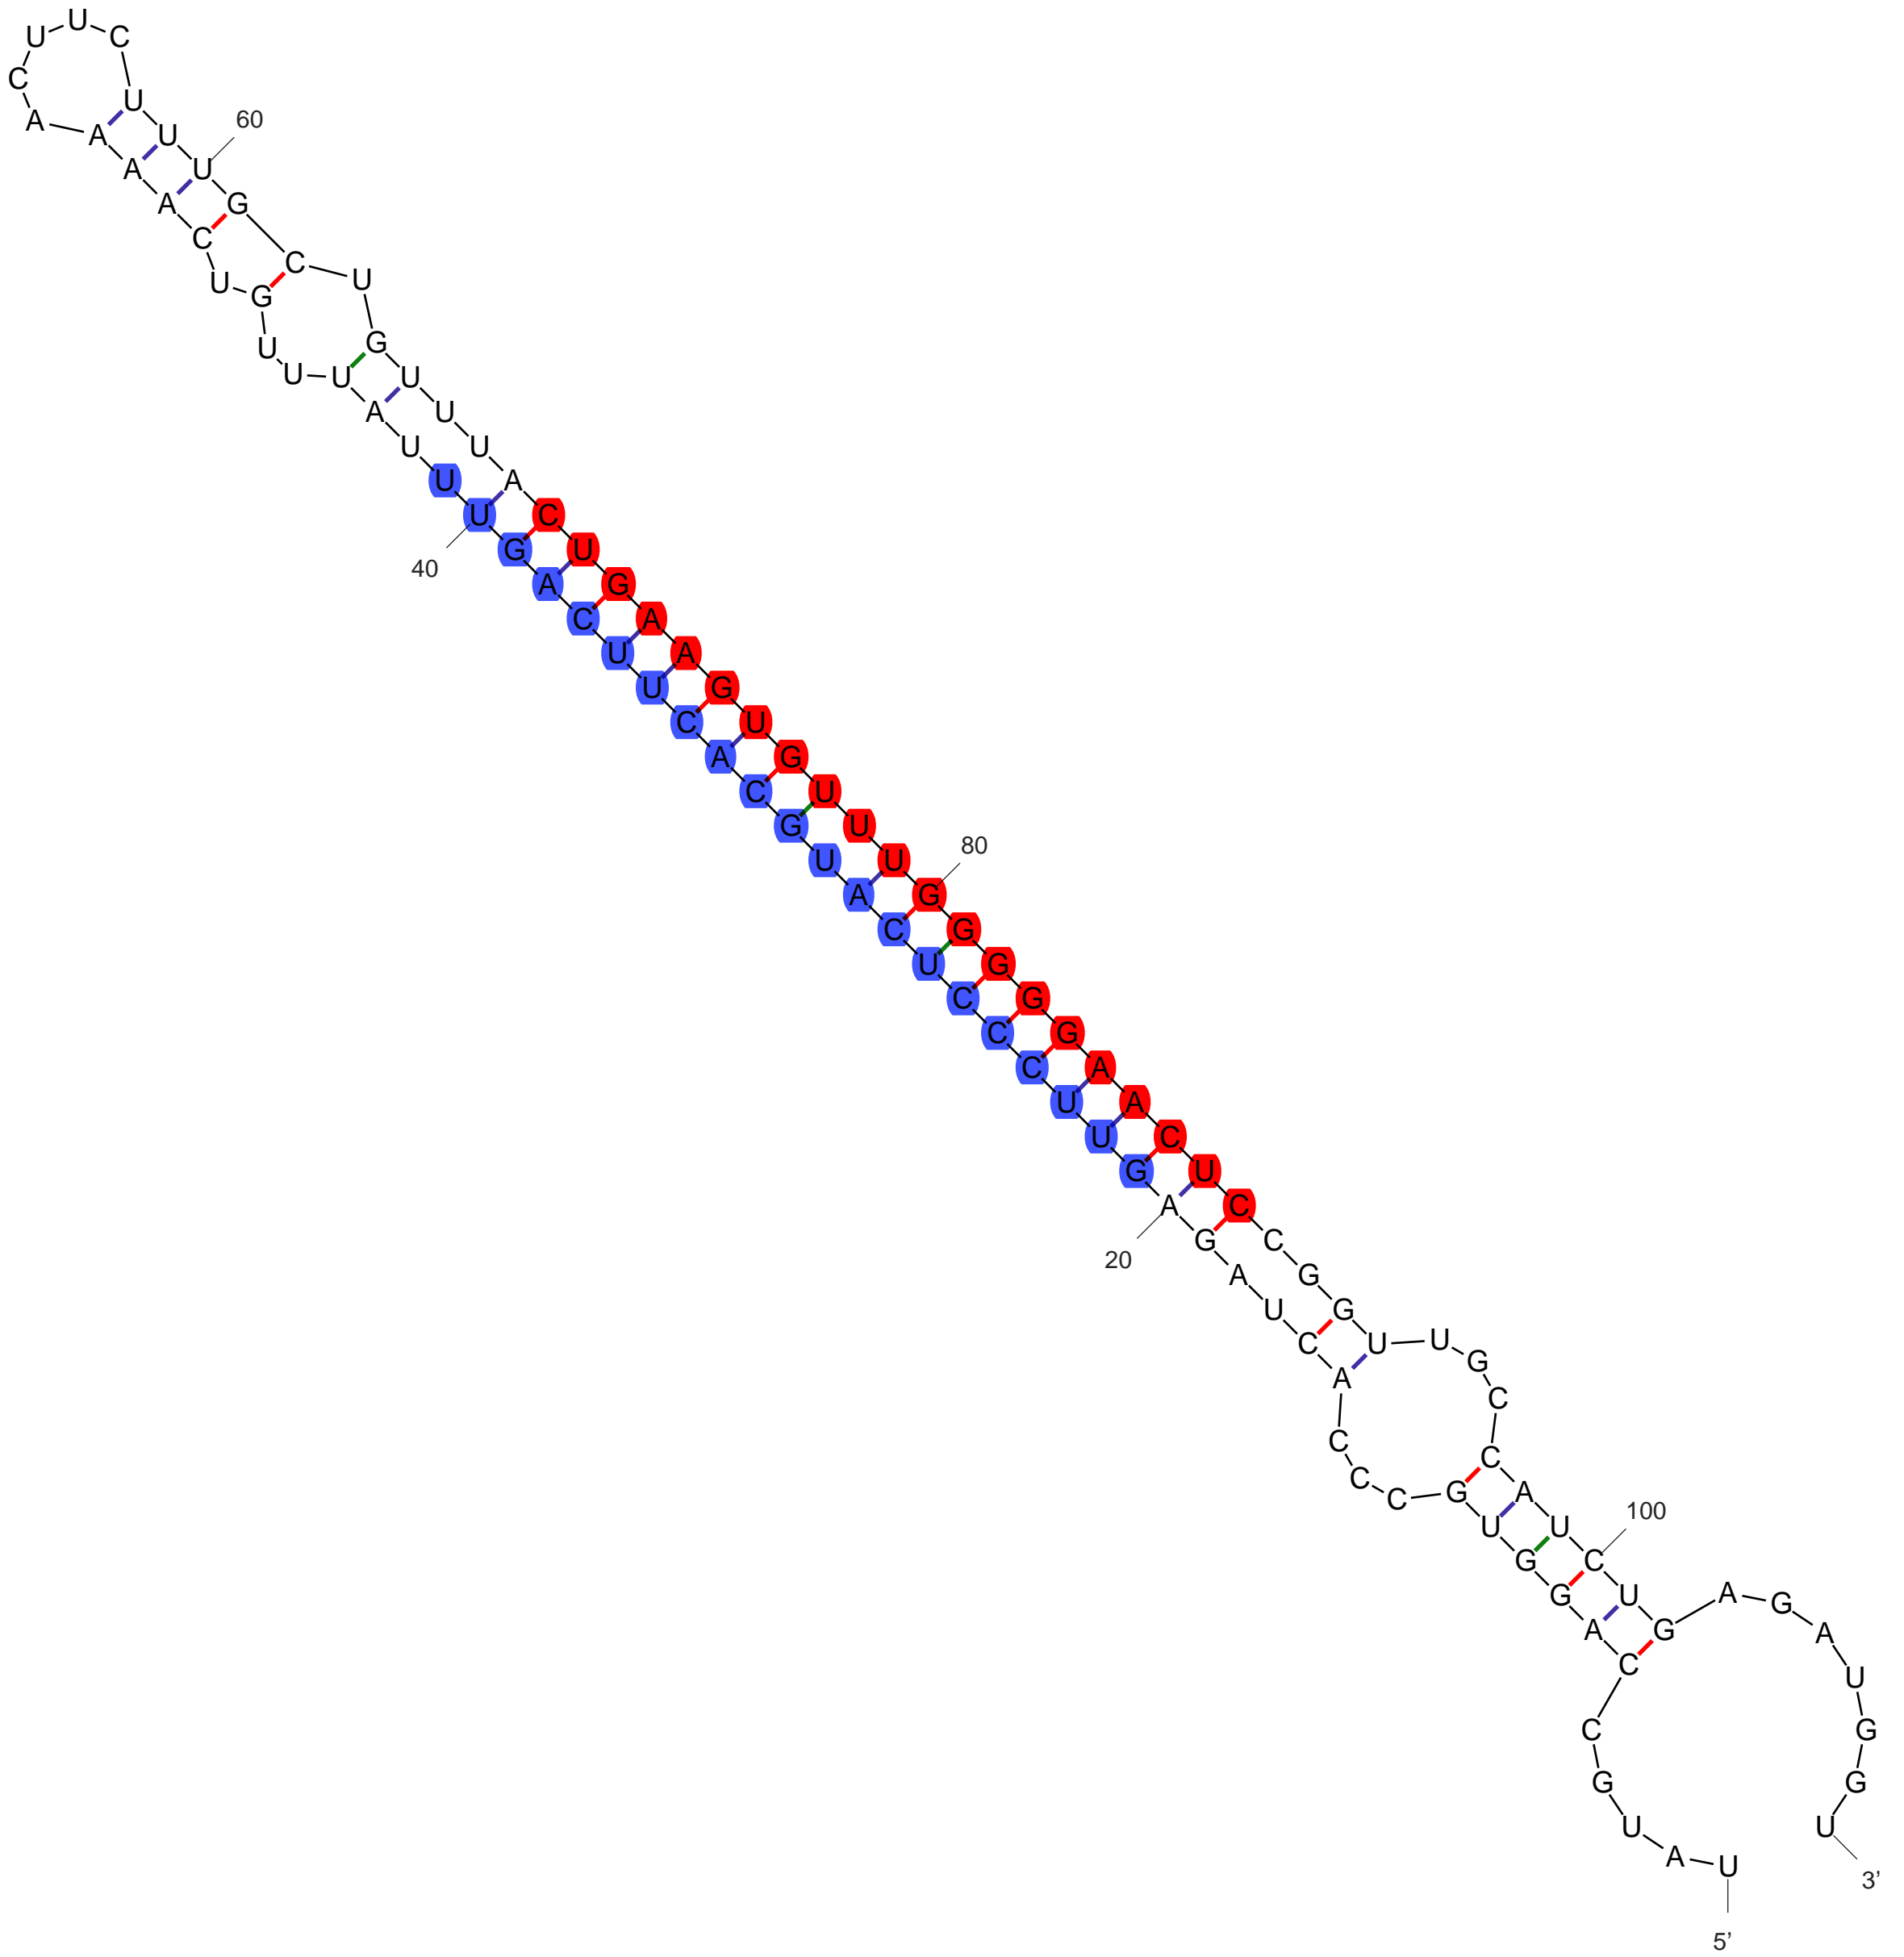

$dG = -47.20$  [Initially -47.50] 106-MIR395

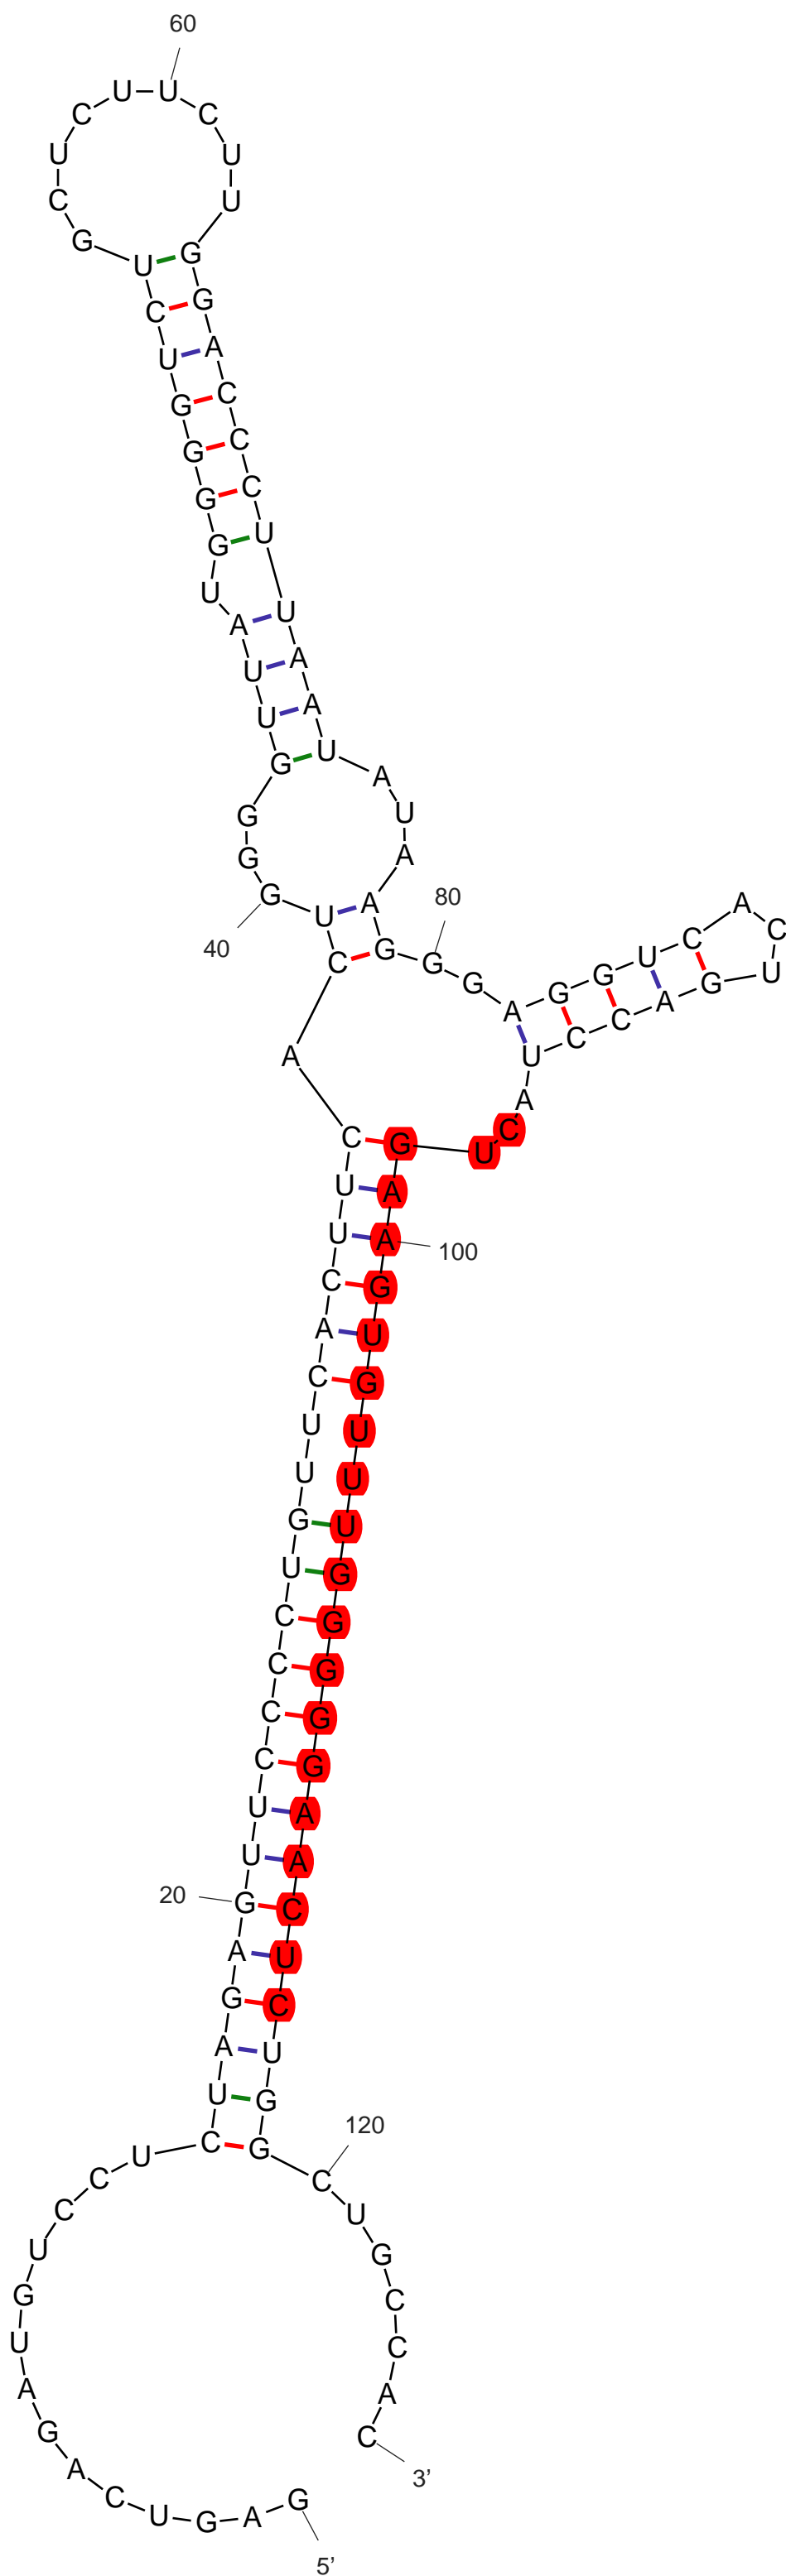

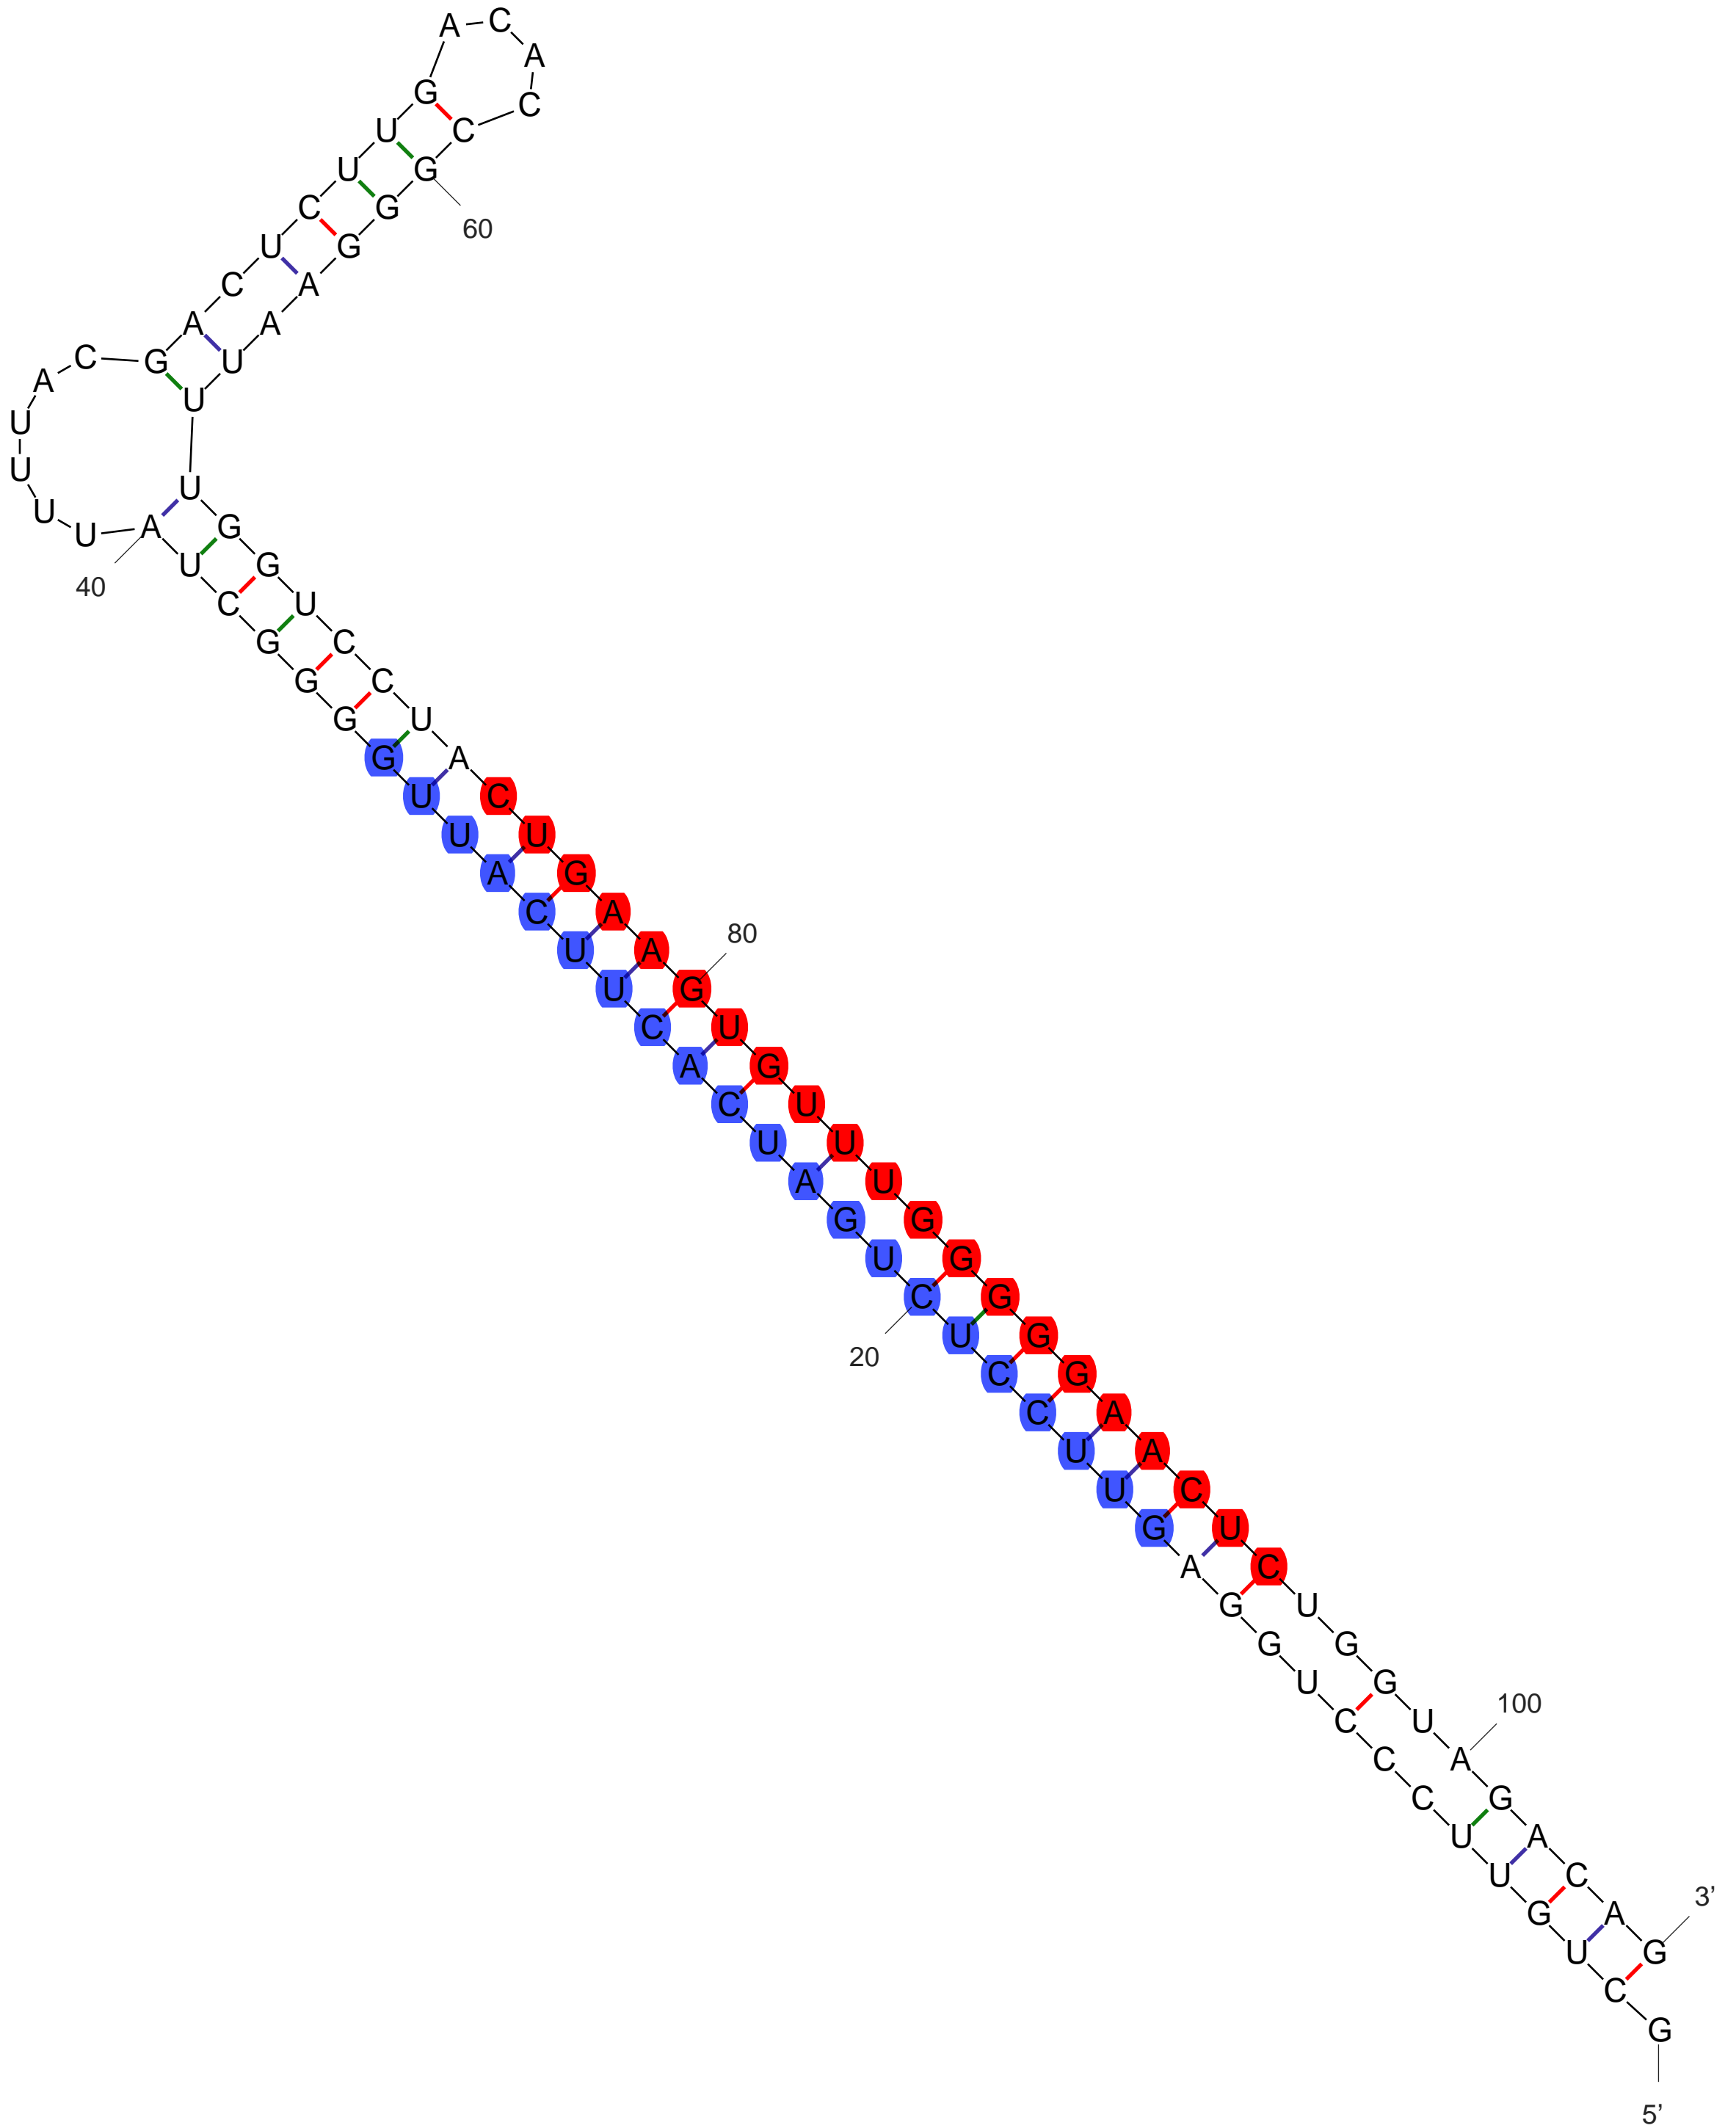

*dG = -51.20 [Initially -51.20] 108-MIR395*



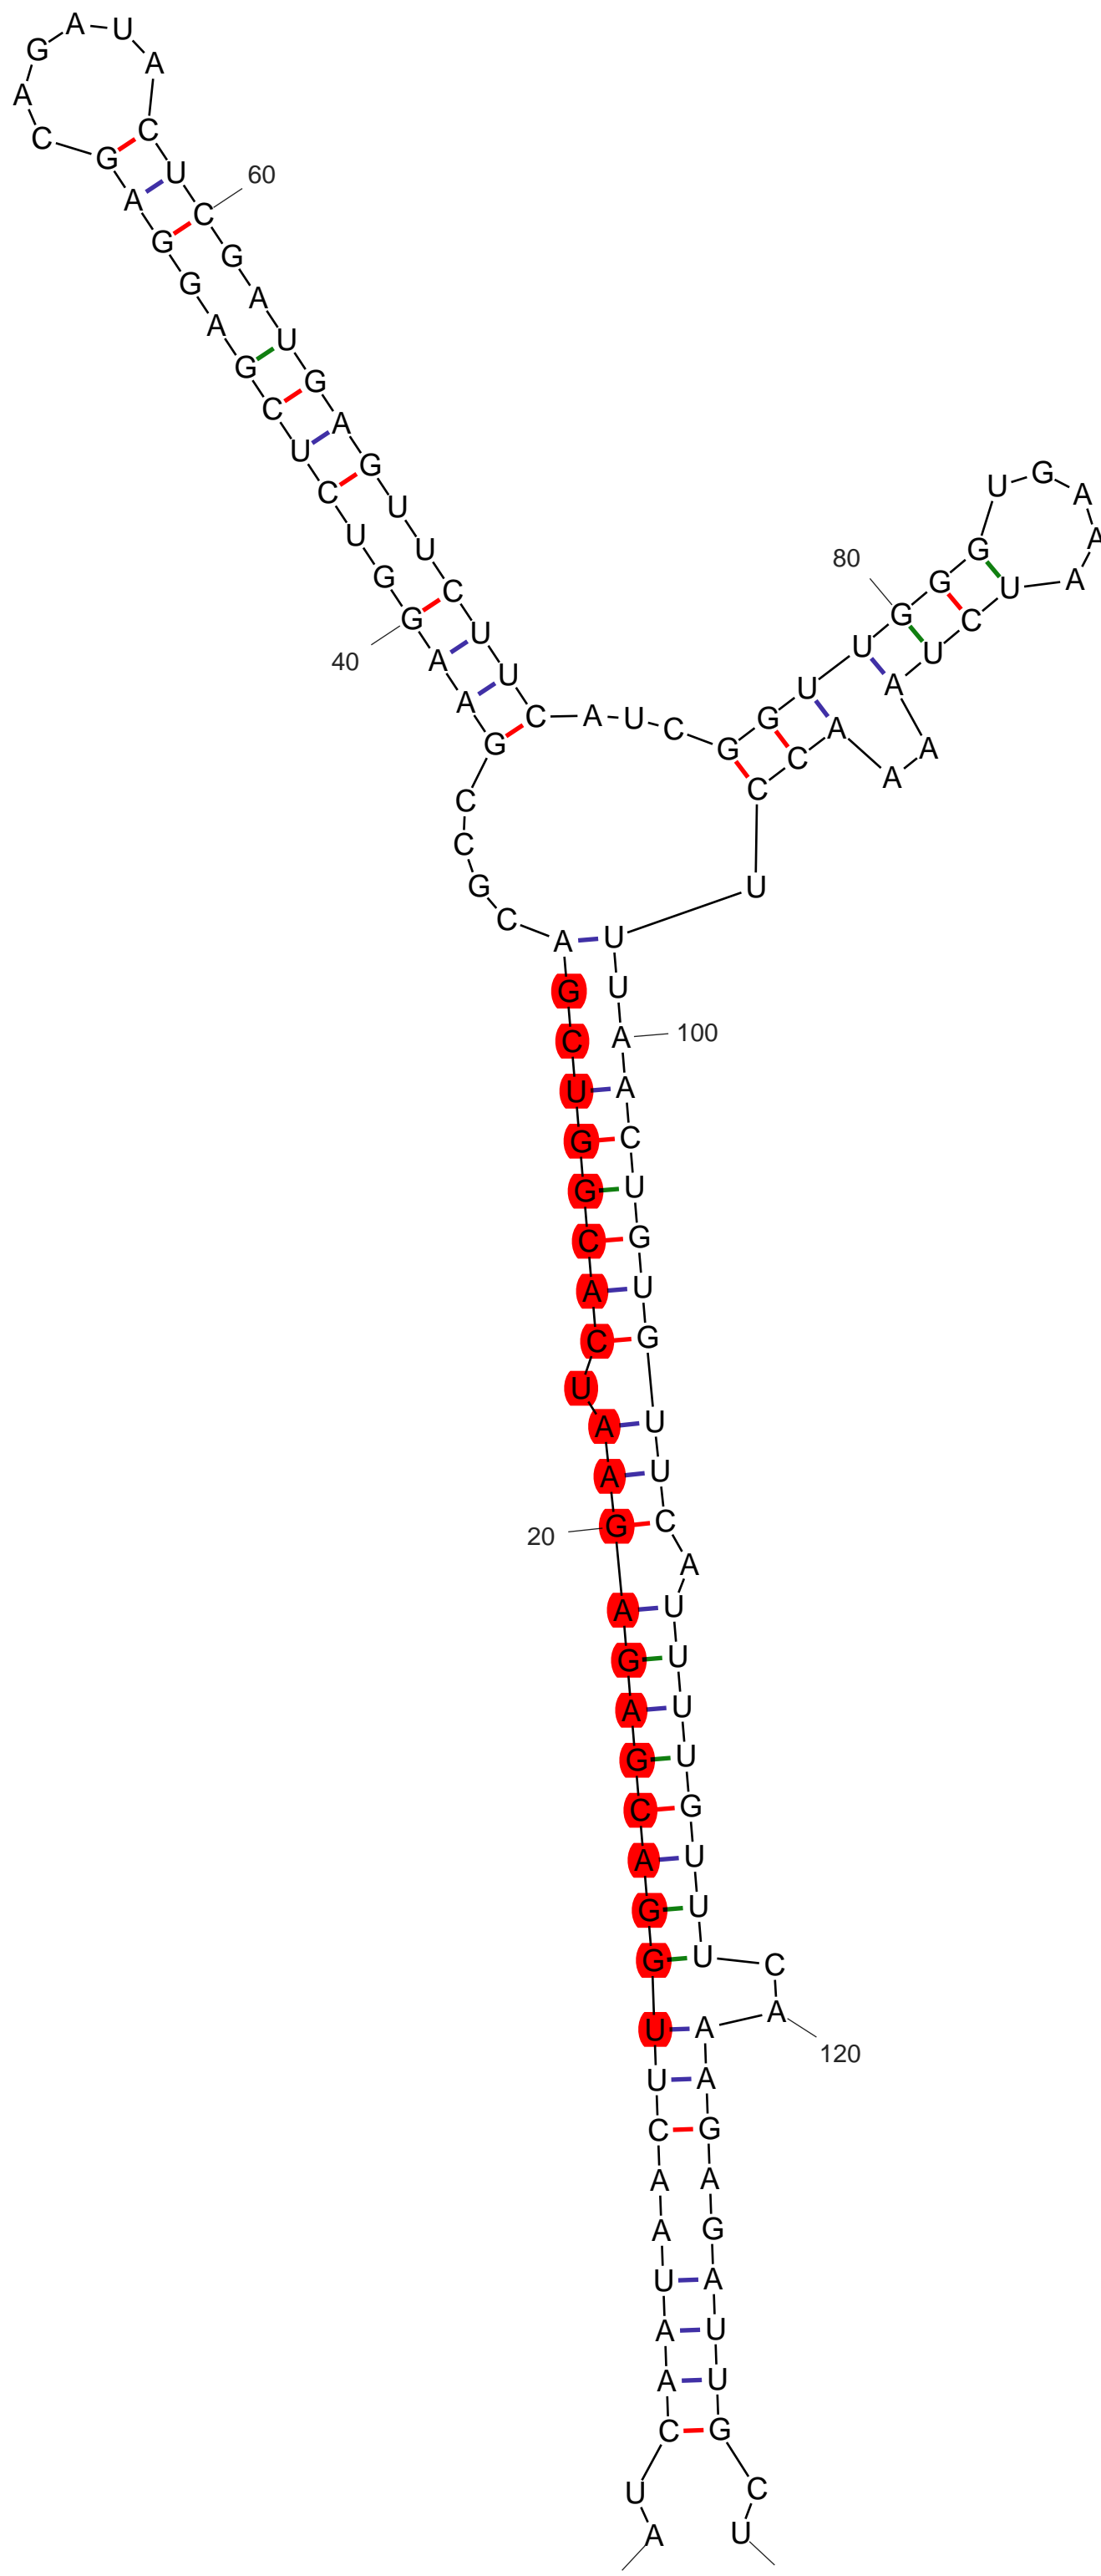

$dG = -32.18$  [Initially  $-34.10$ ] 109-MIR3954

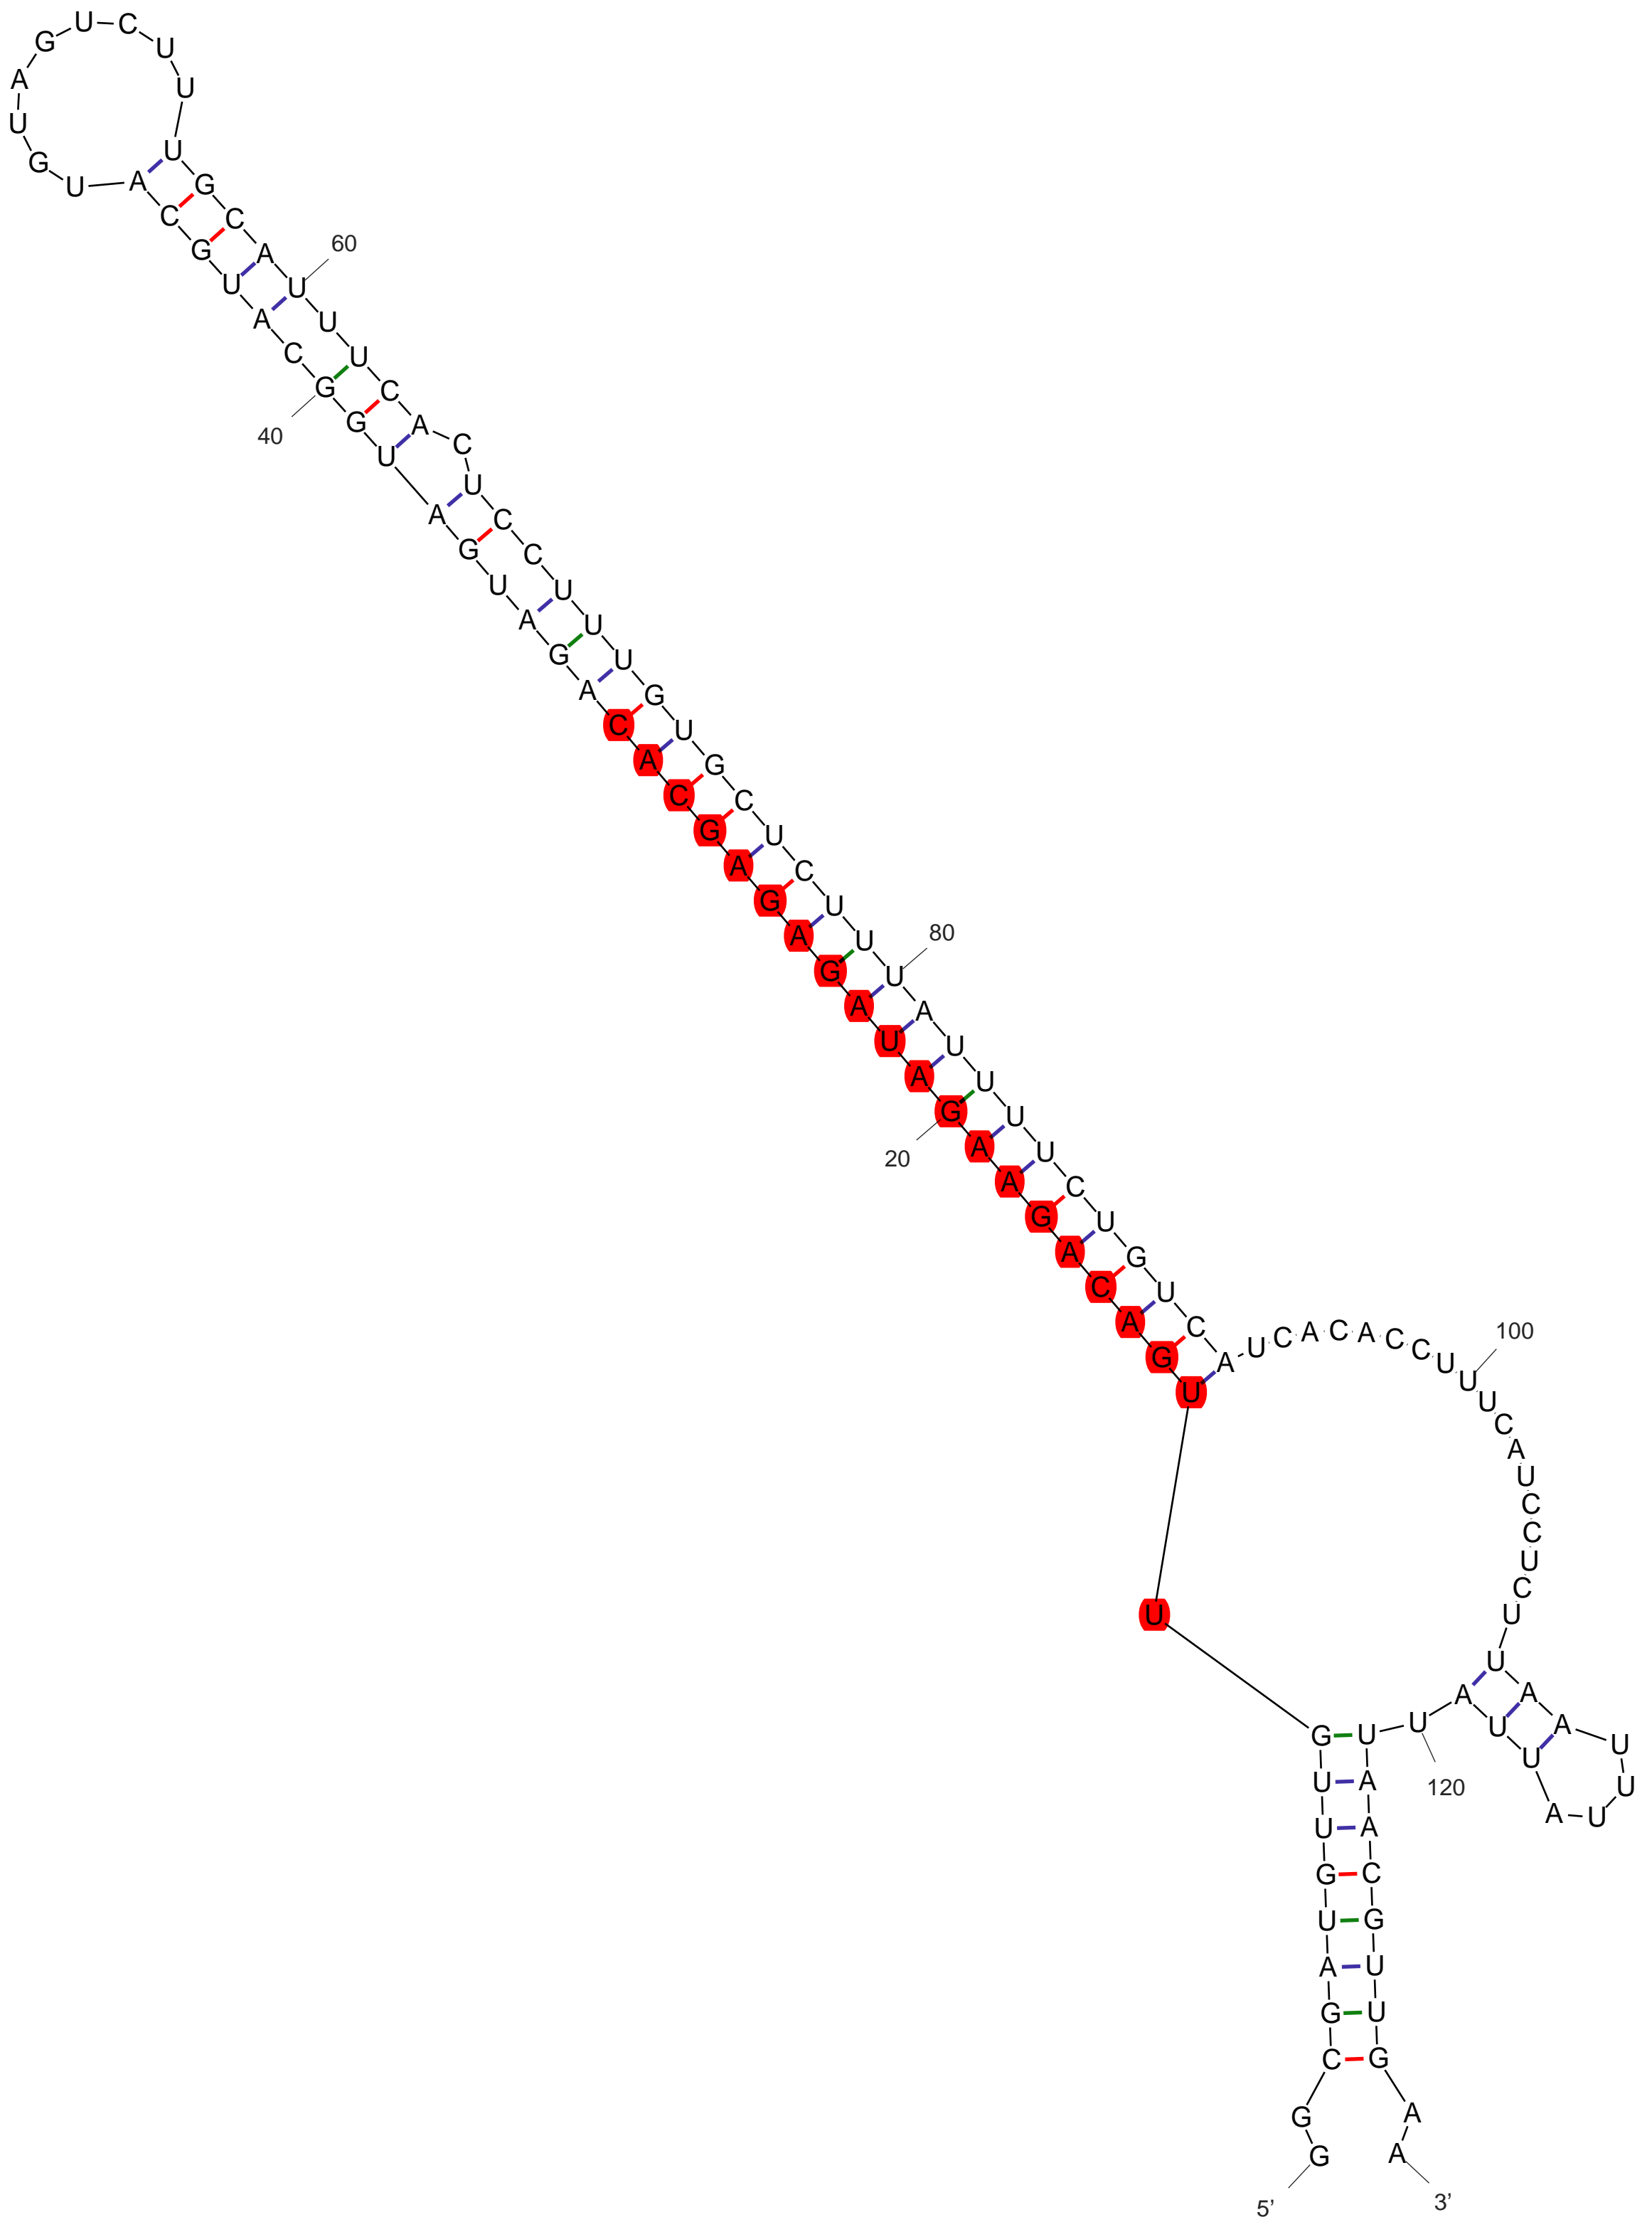

$dG = -43.08$  [Initially -46.30] 10-MIR156-[tcc-MIR156e MI0017457]

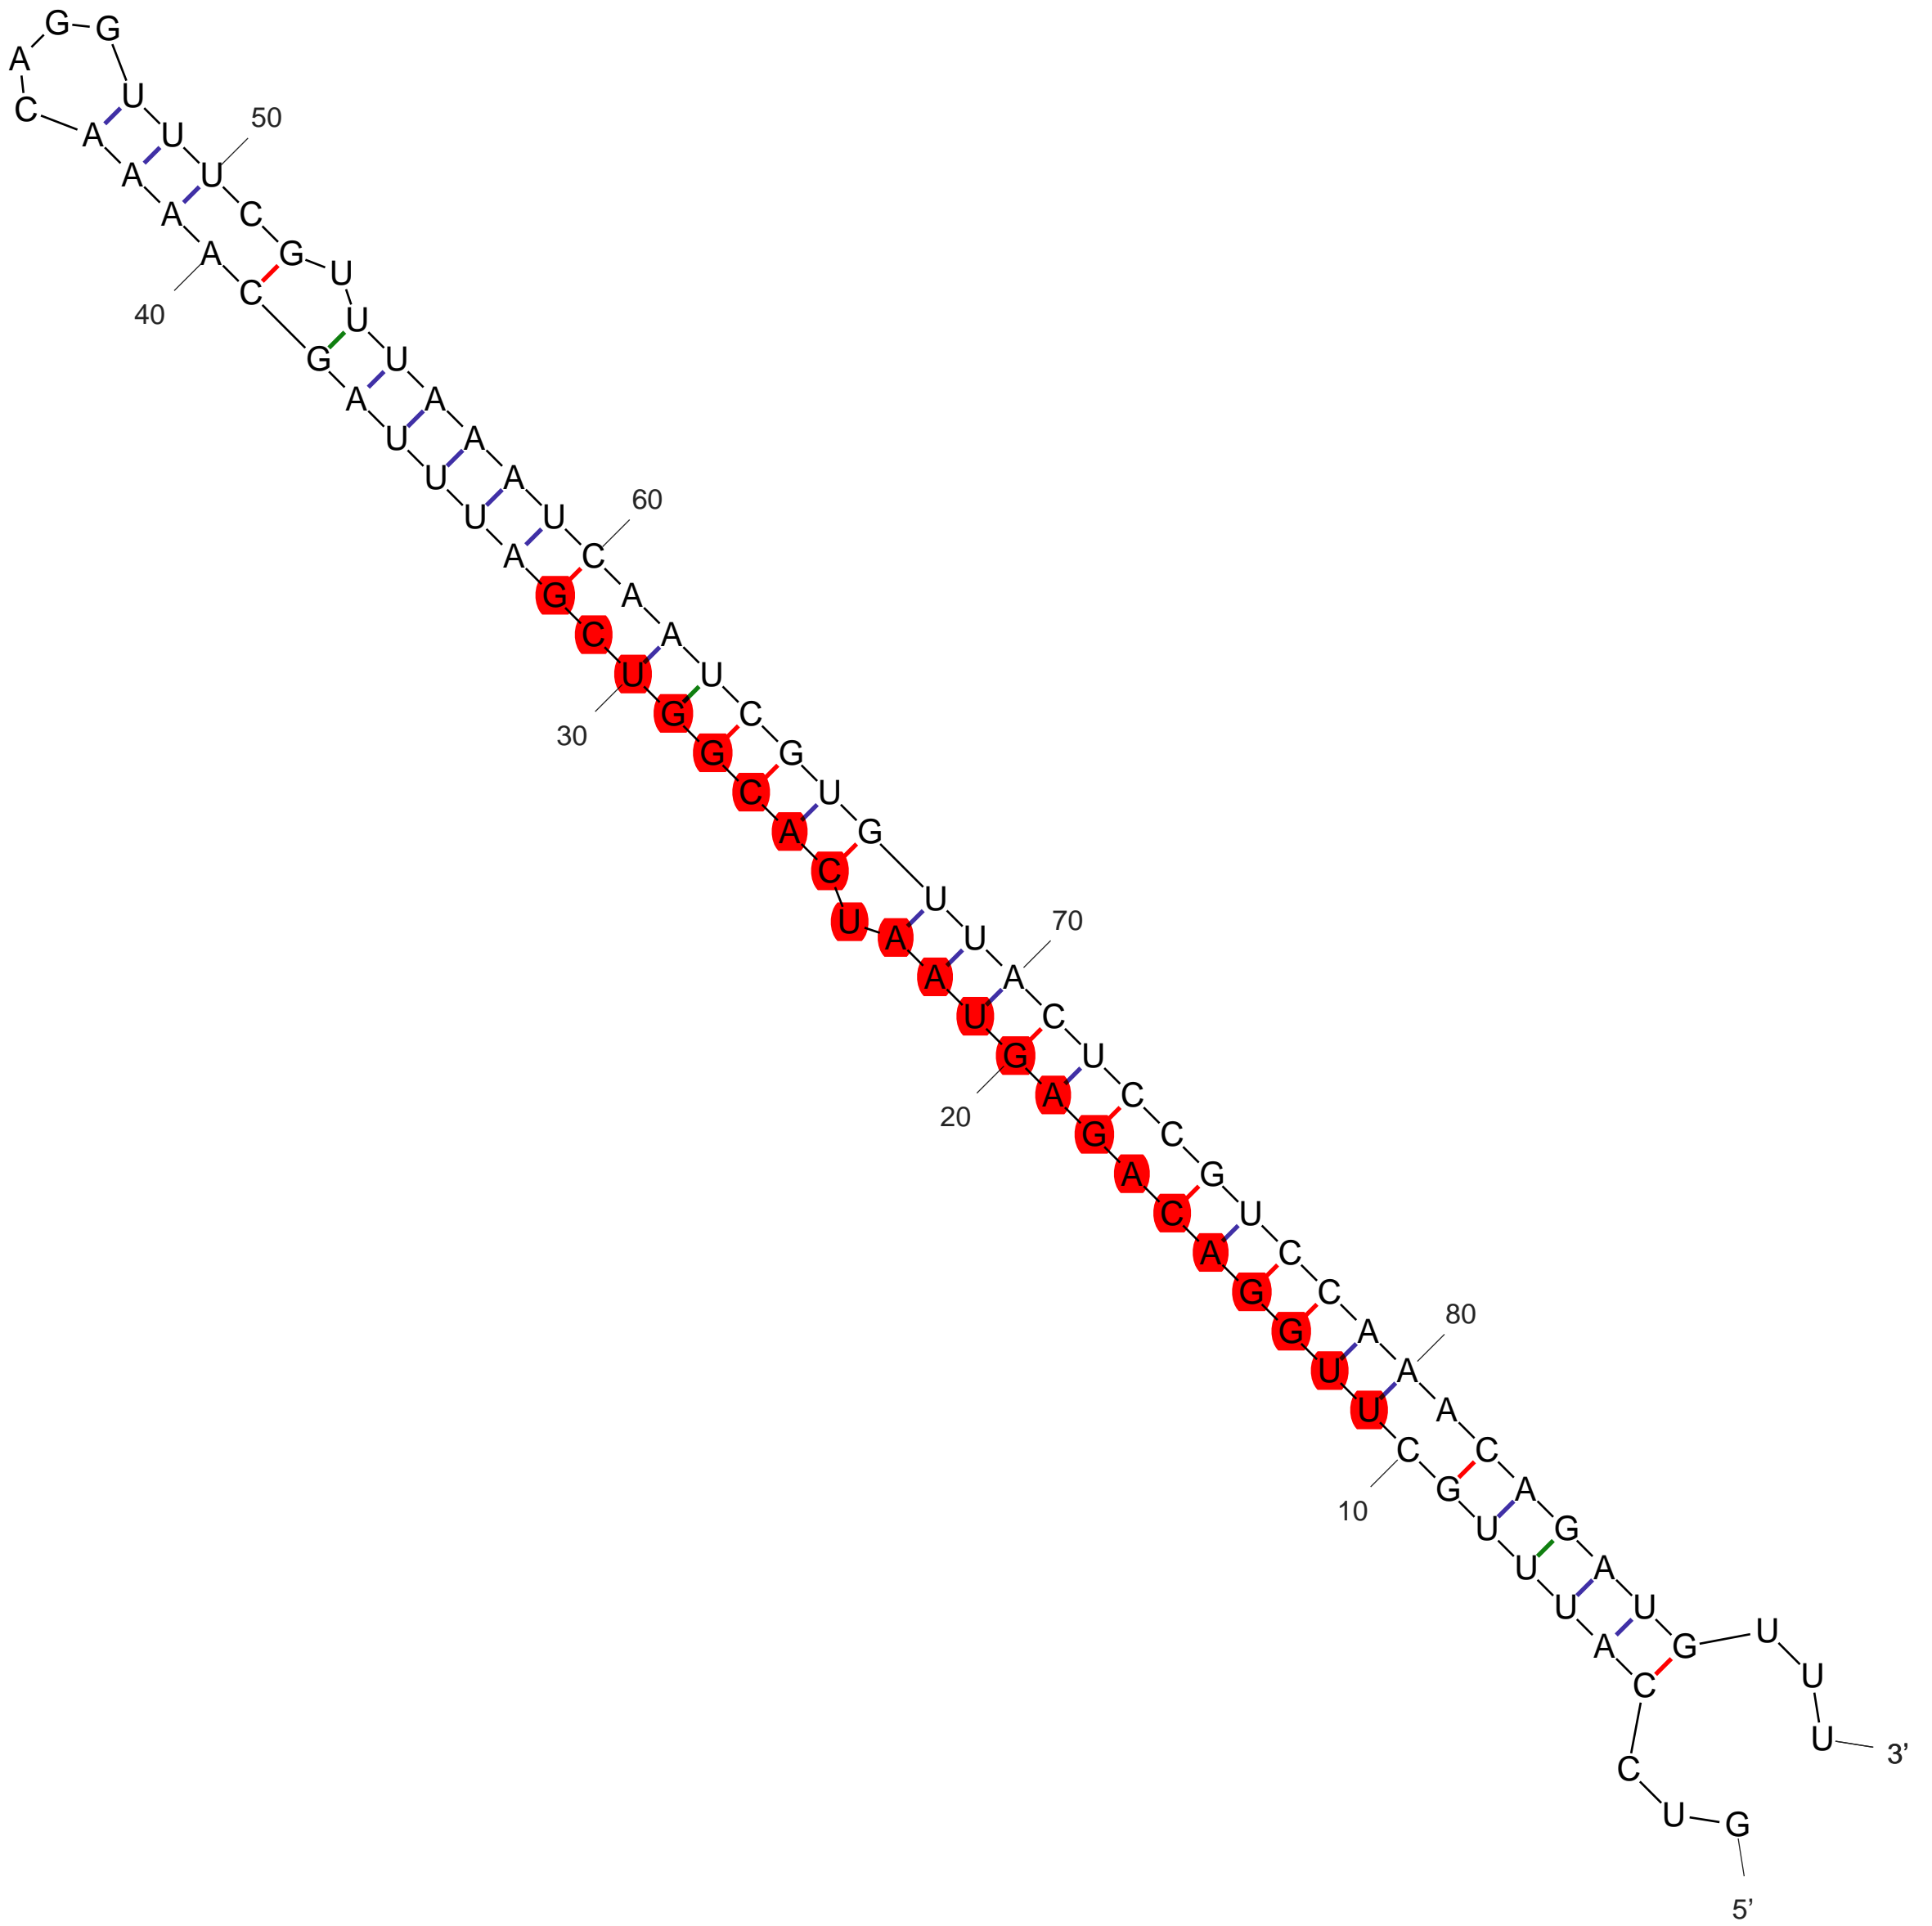

$dG = -35.80$  [Initially -35.80] 110-MIR3954

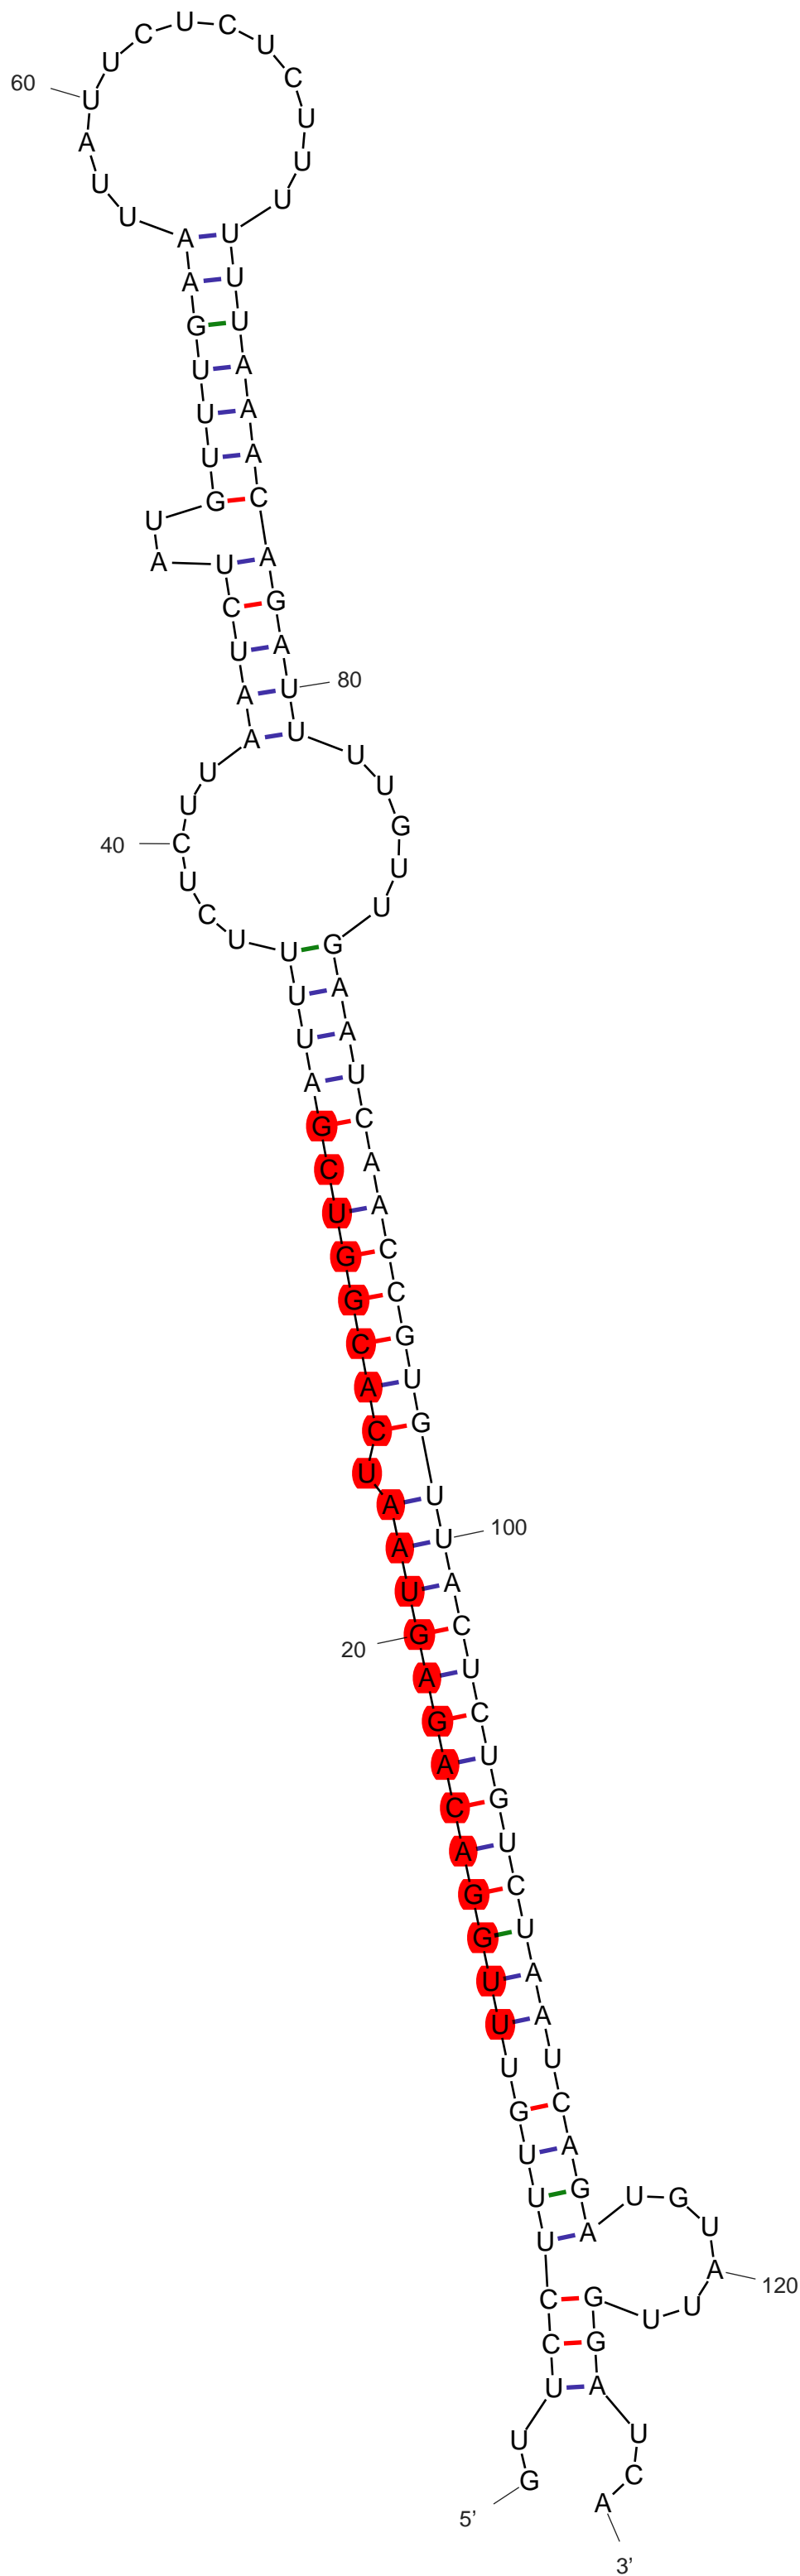

$dG = -42.60$  [Initially -42.60] 111-MIR3954

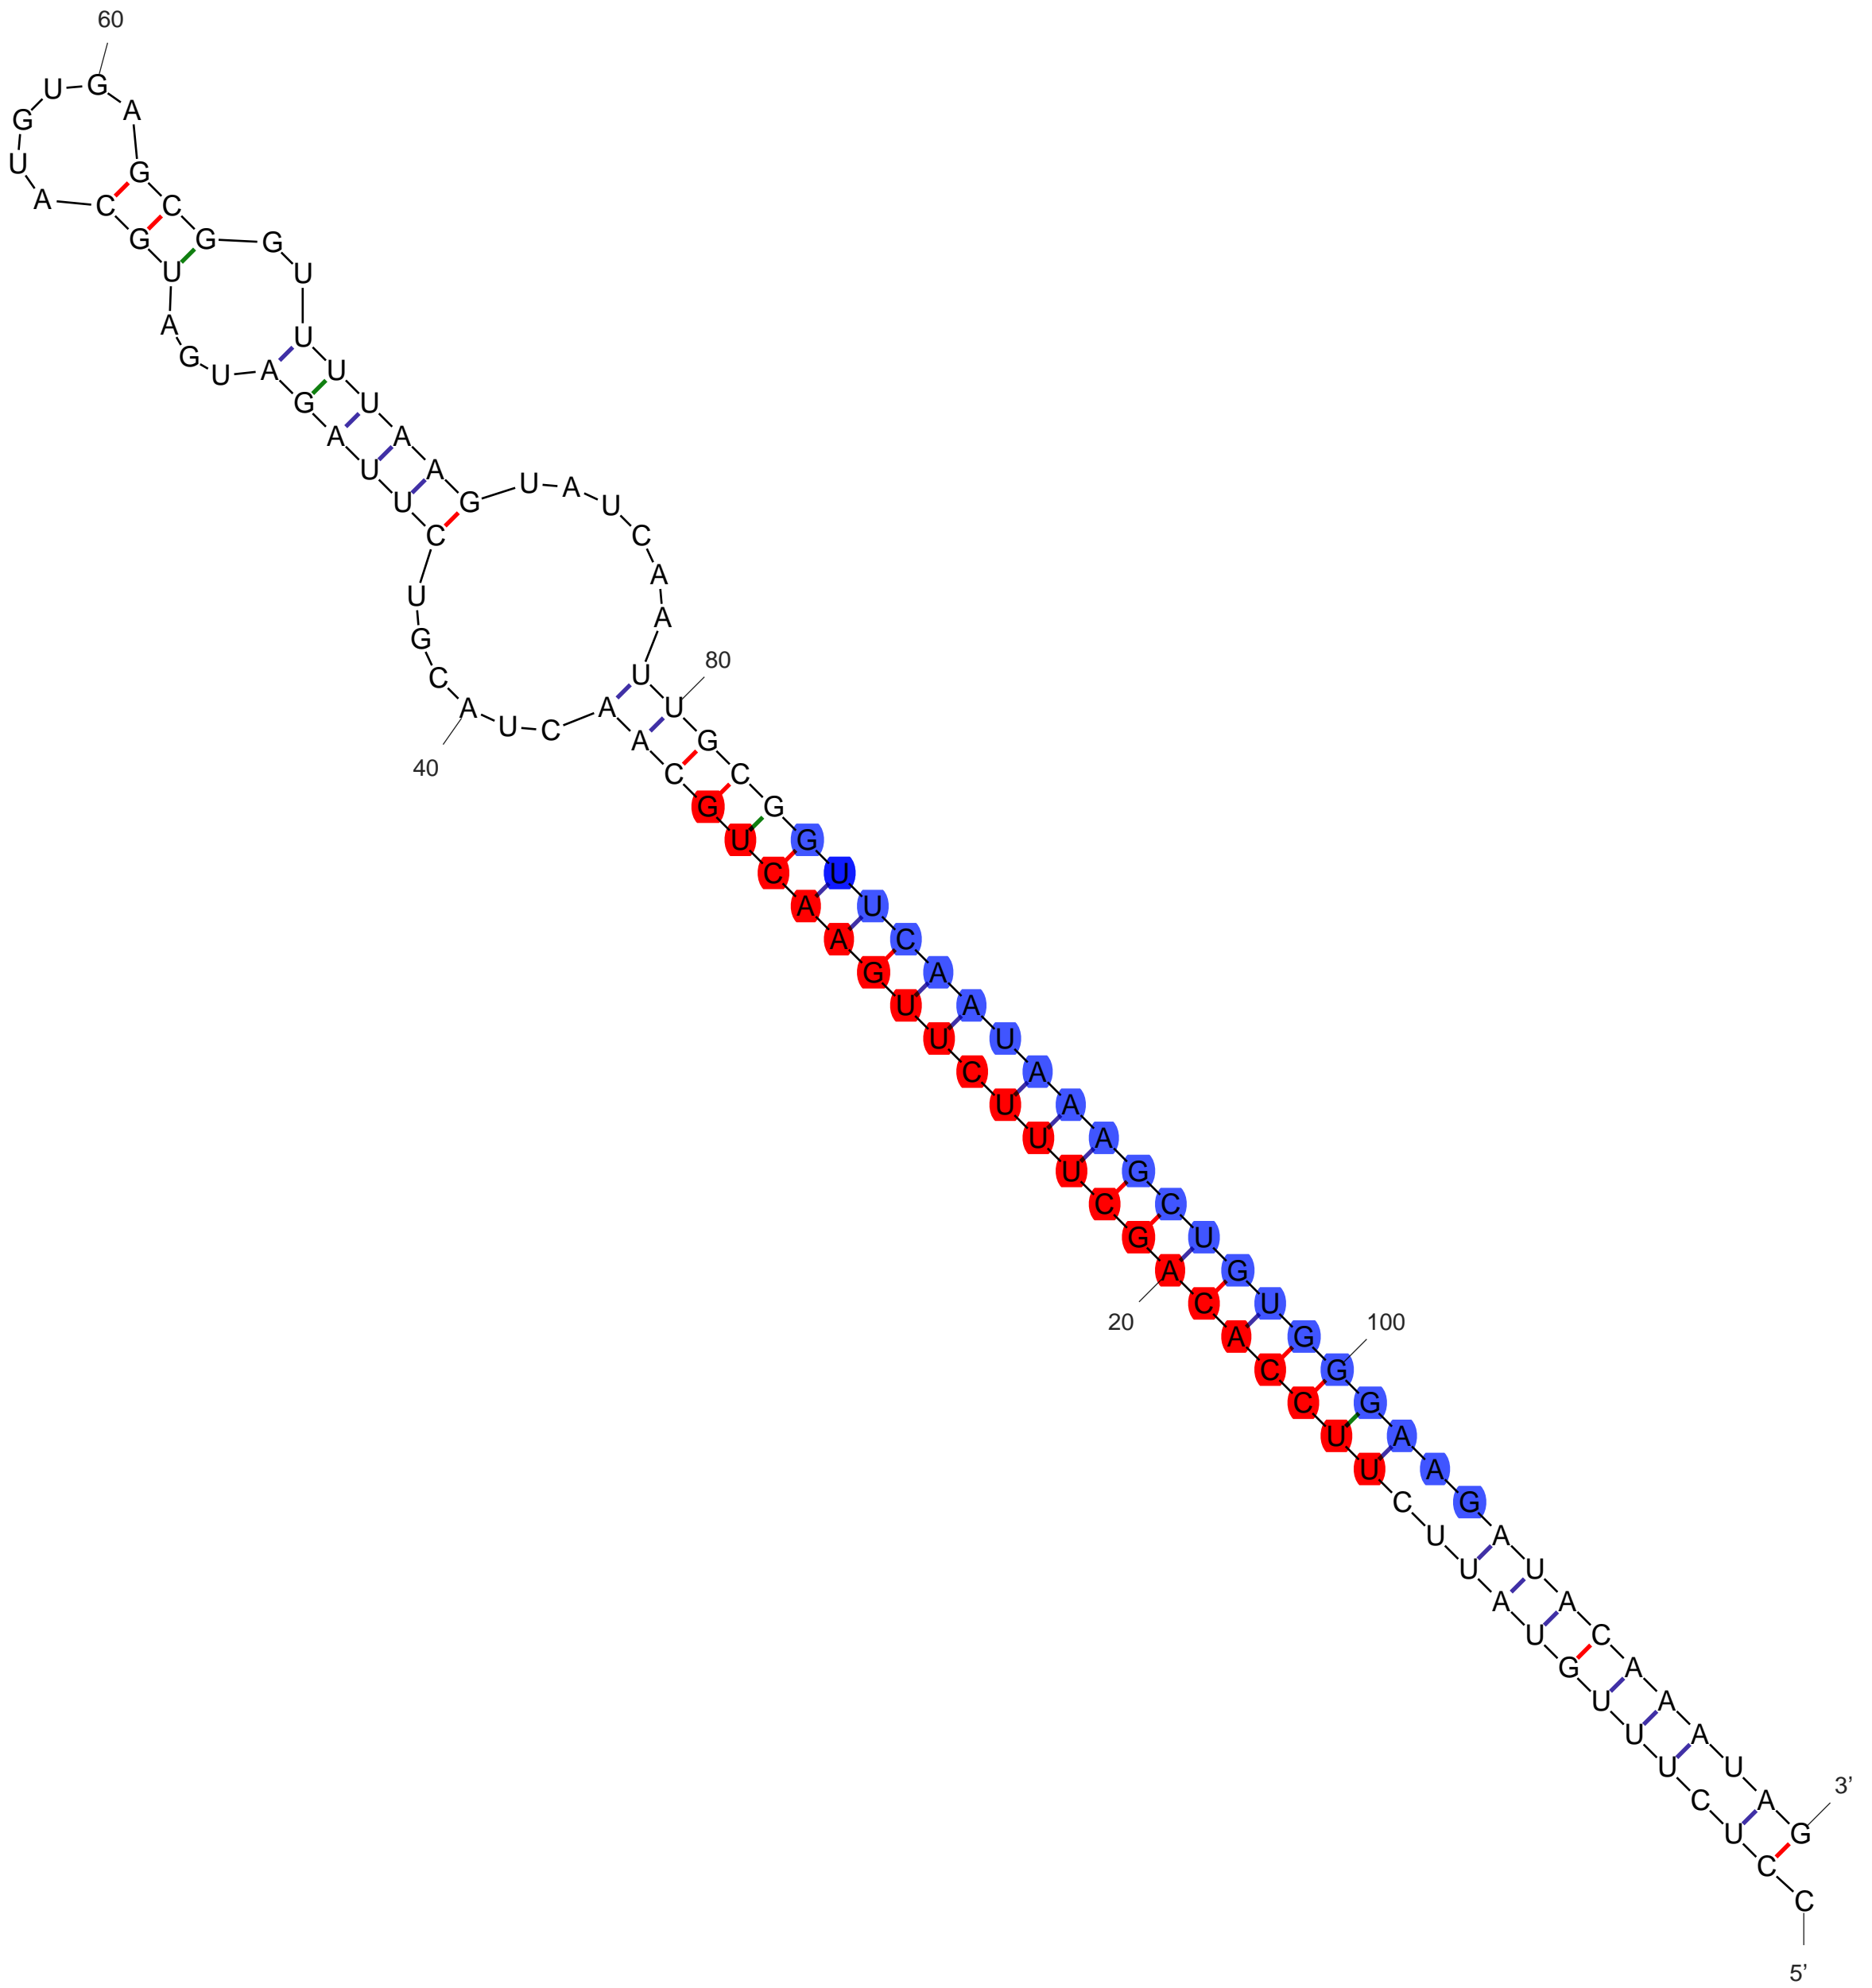

$dG = -50.50$  [Initially -50.50] 112-MIR396

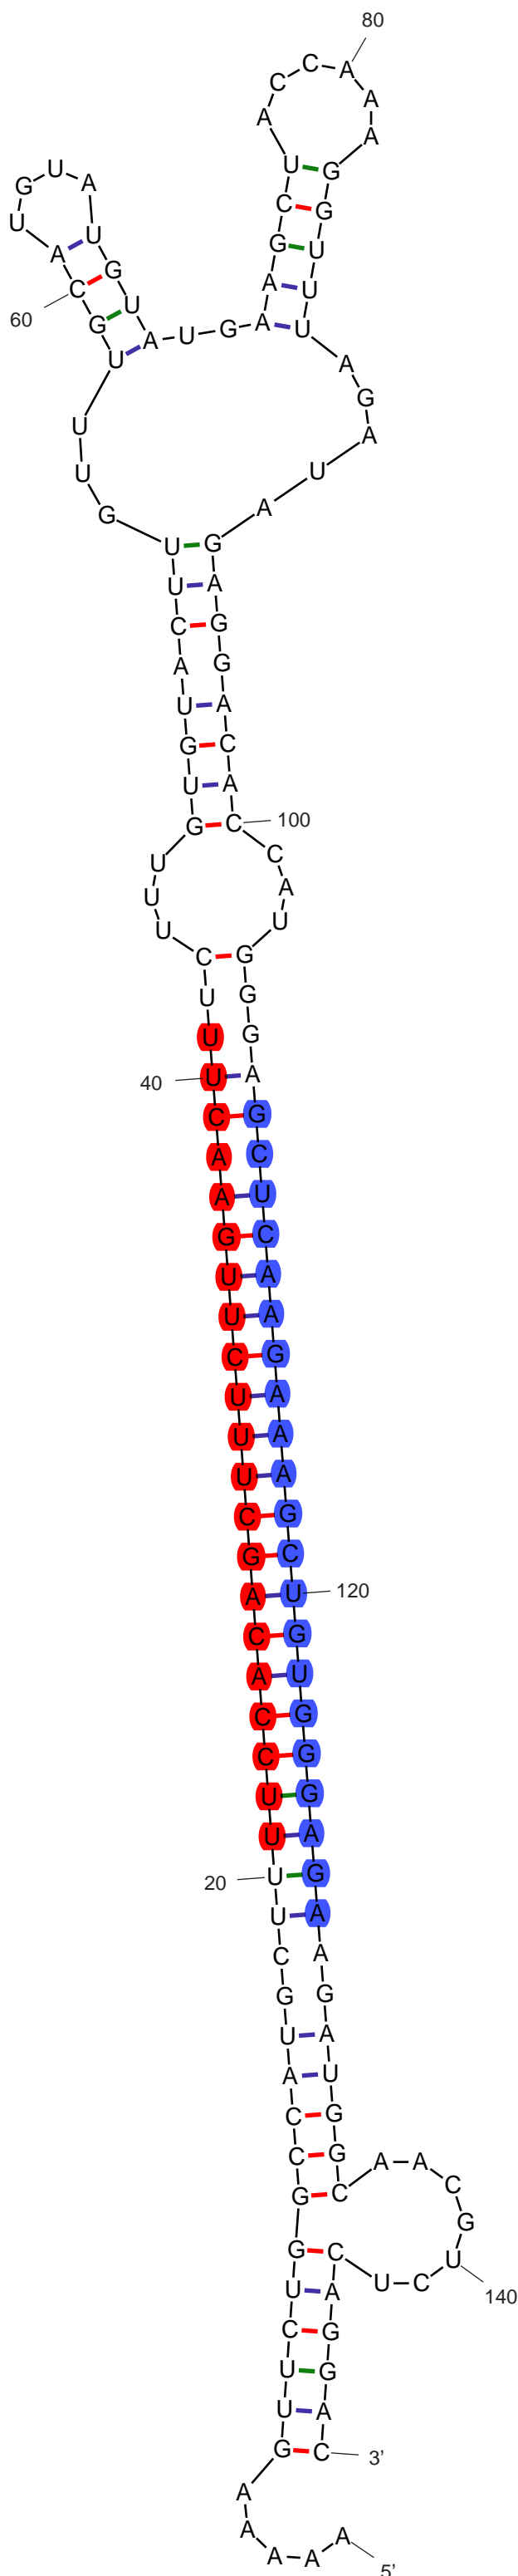

$dG = -53.34$  [Initially -56.70] 113-MIR396

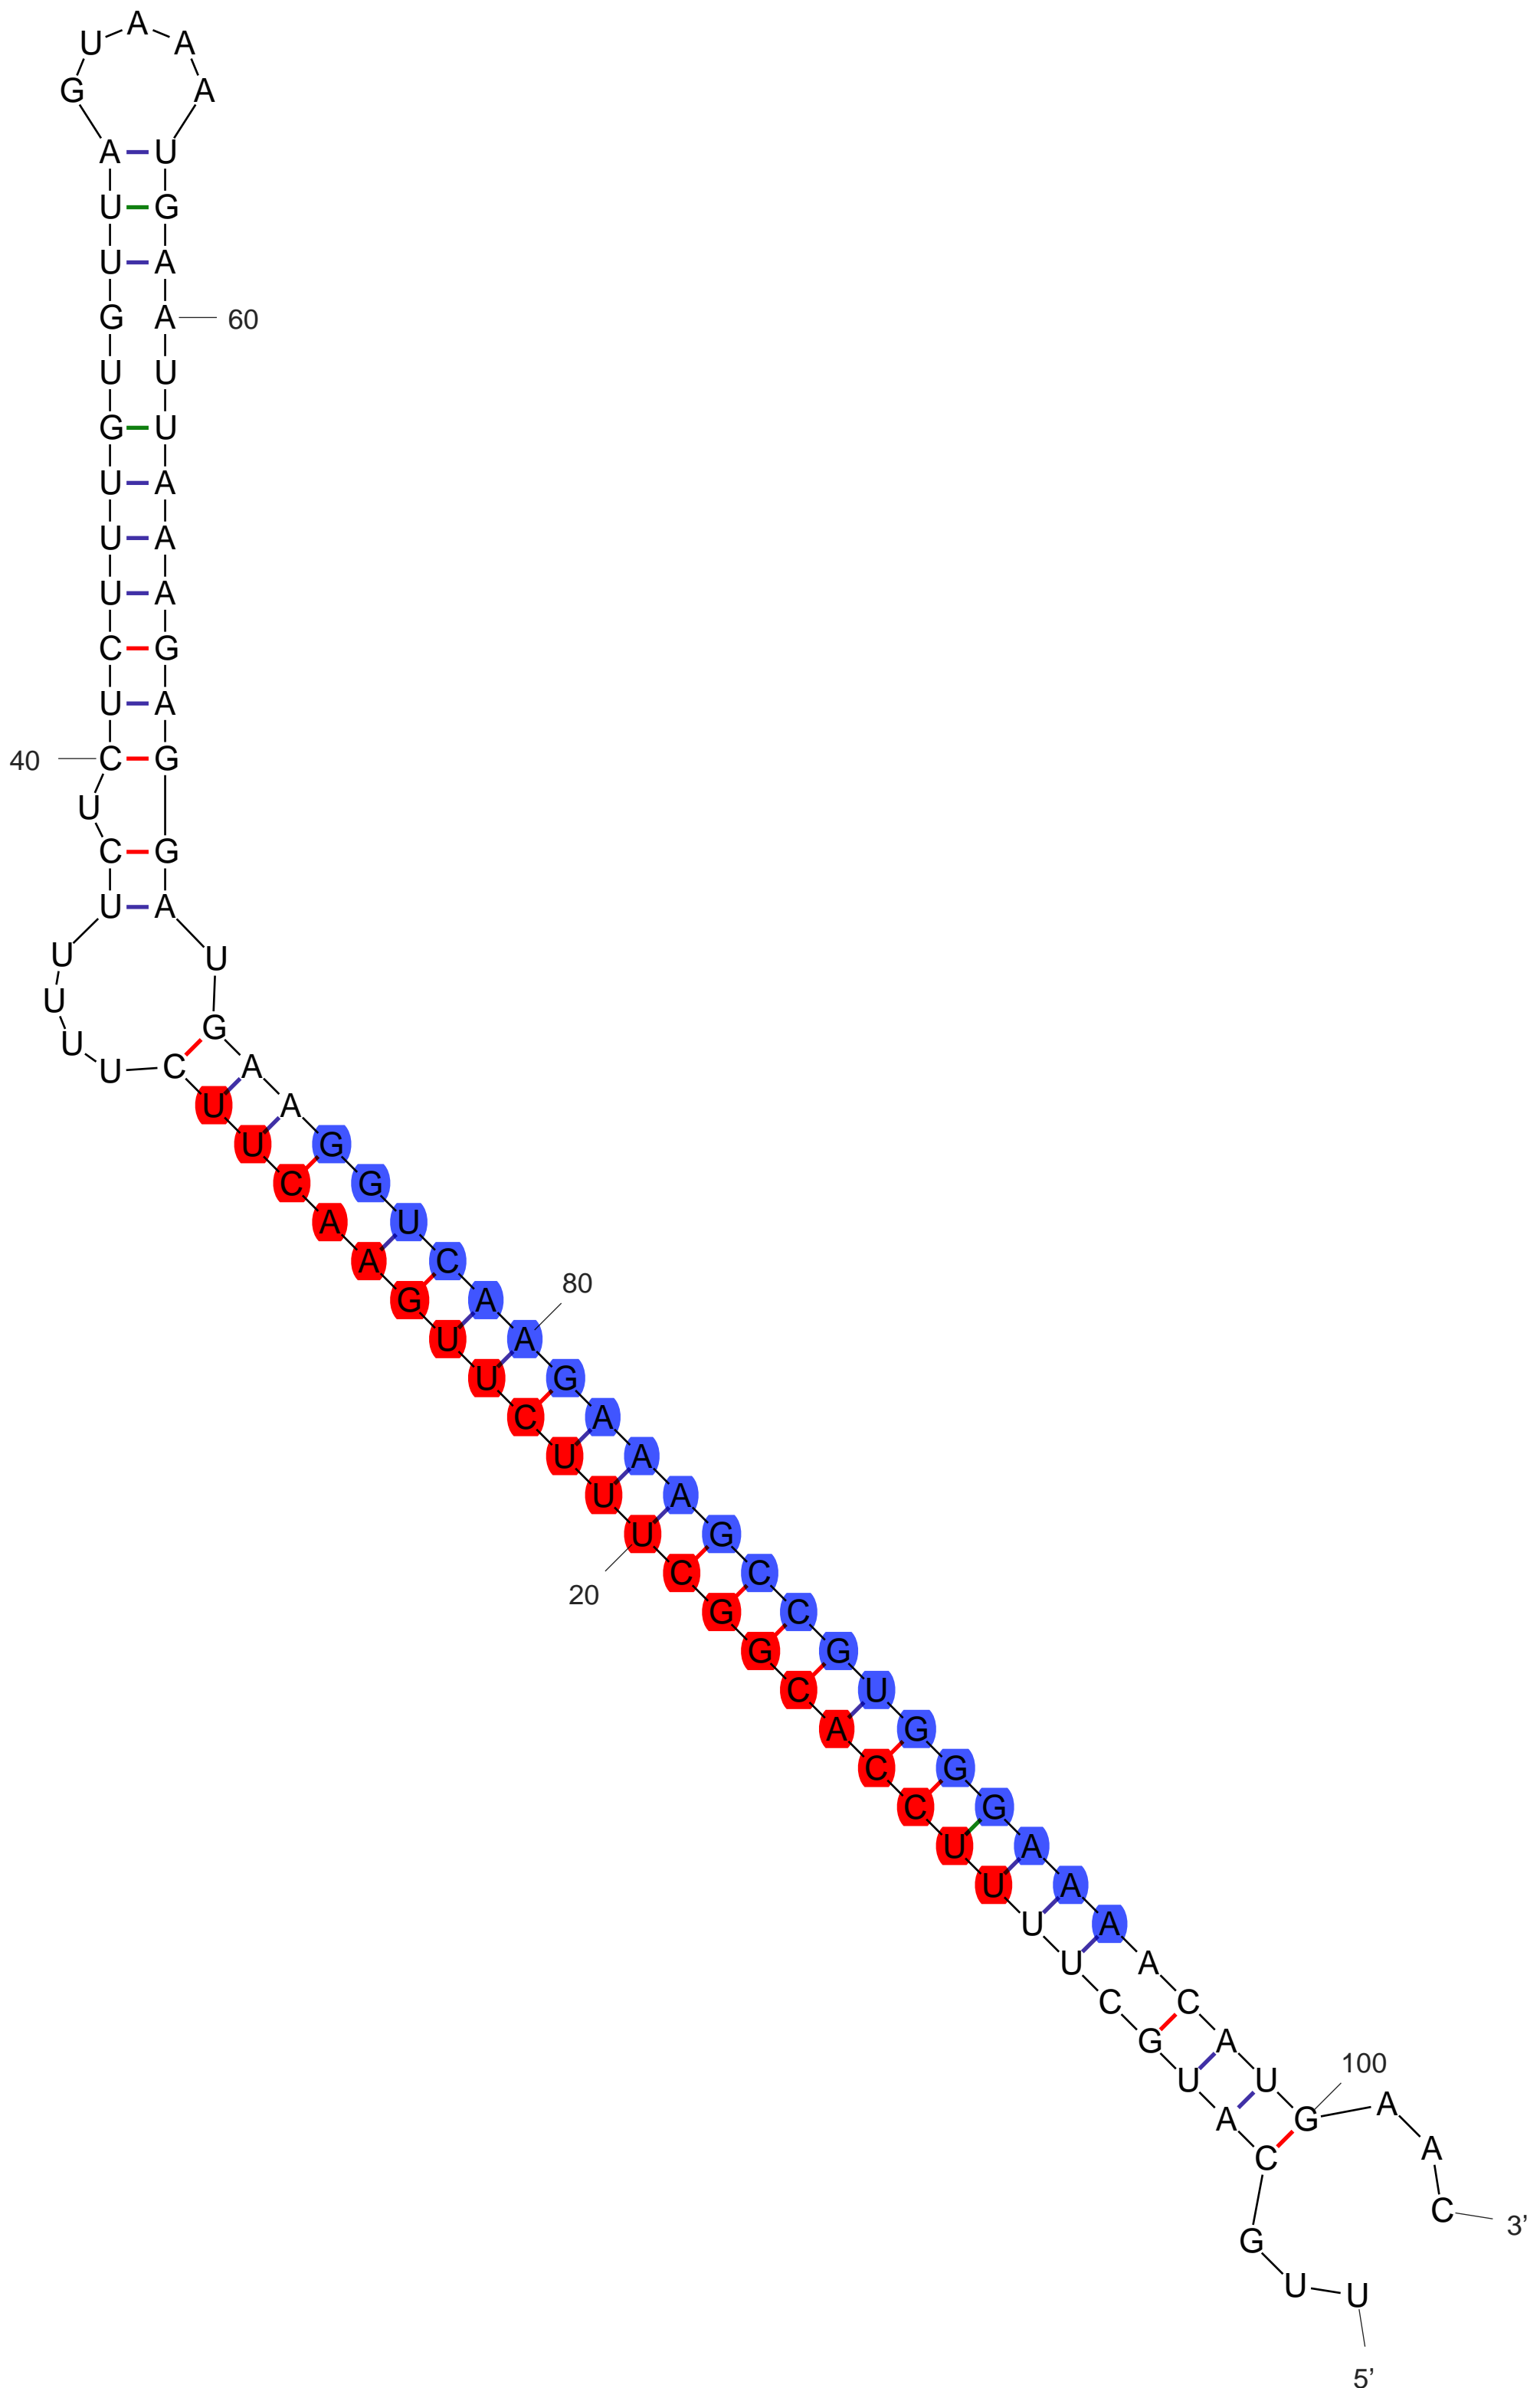

*dG = -47.80 [Initially -47.80] 114-MIR396*

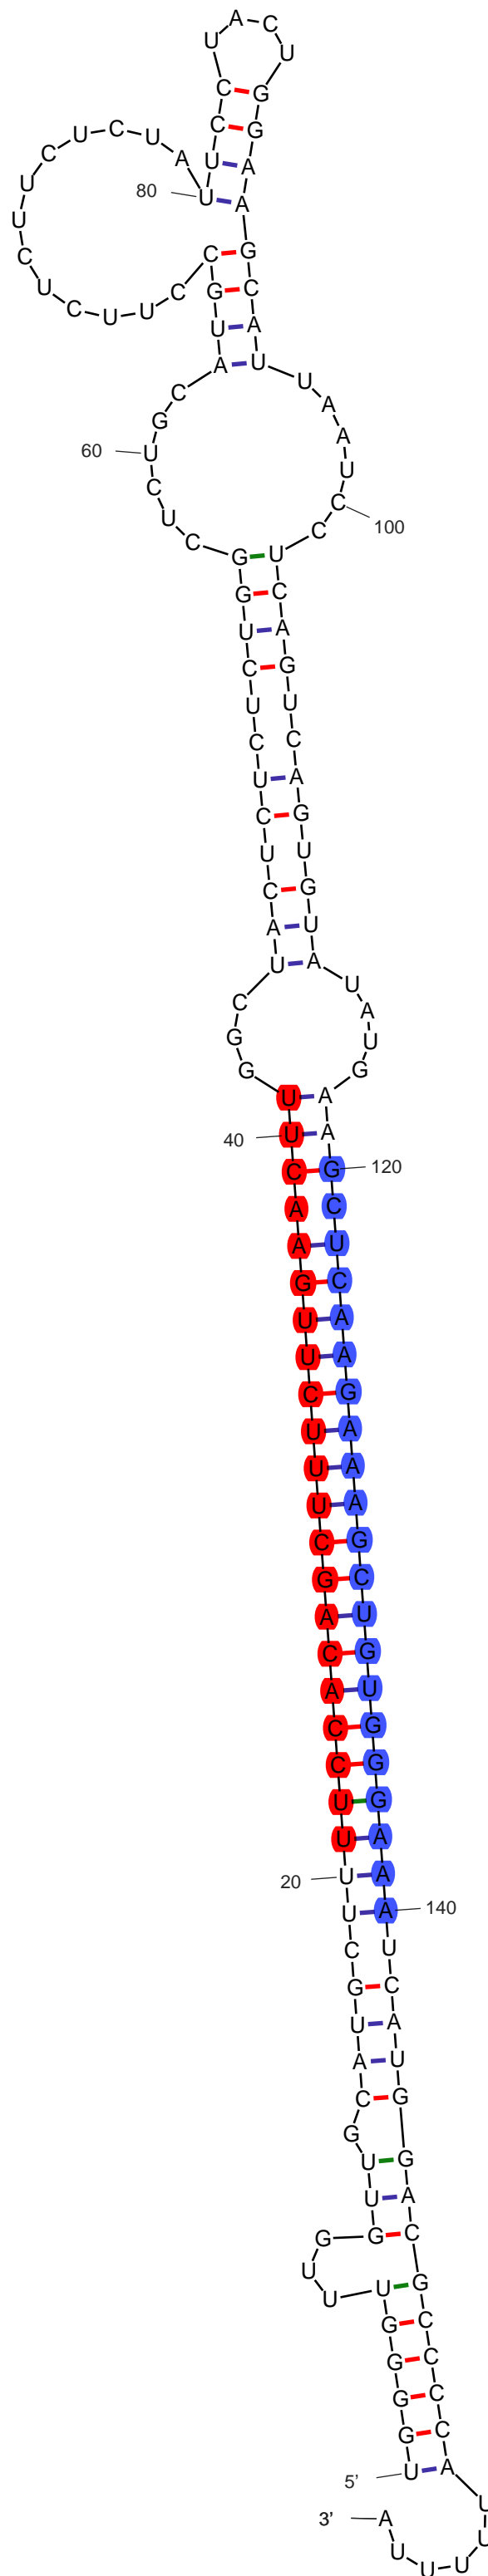

$dG = -58.00$  [Initially -58.00] 115-MIR396



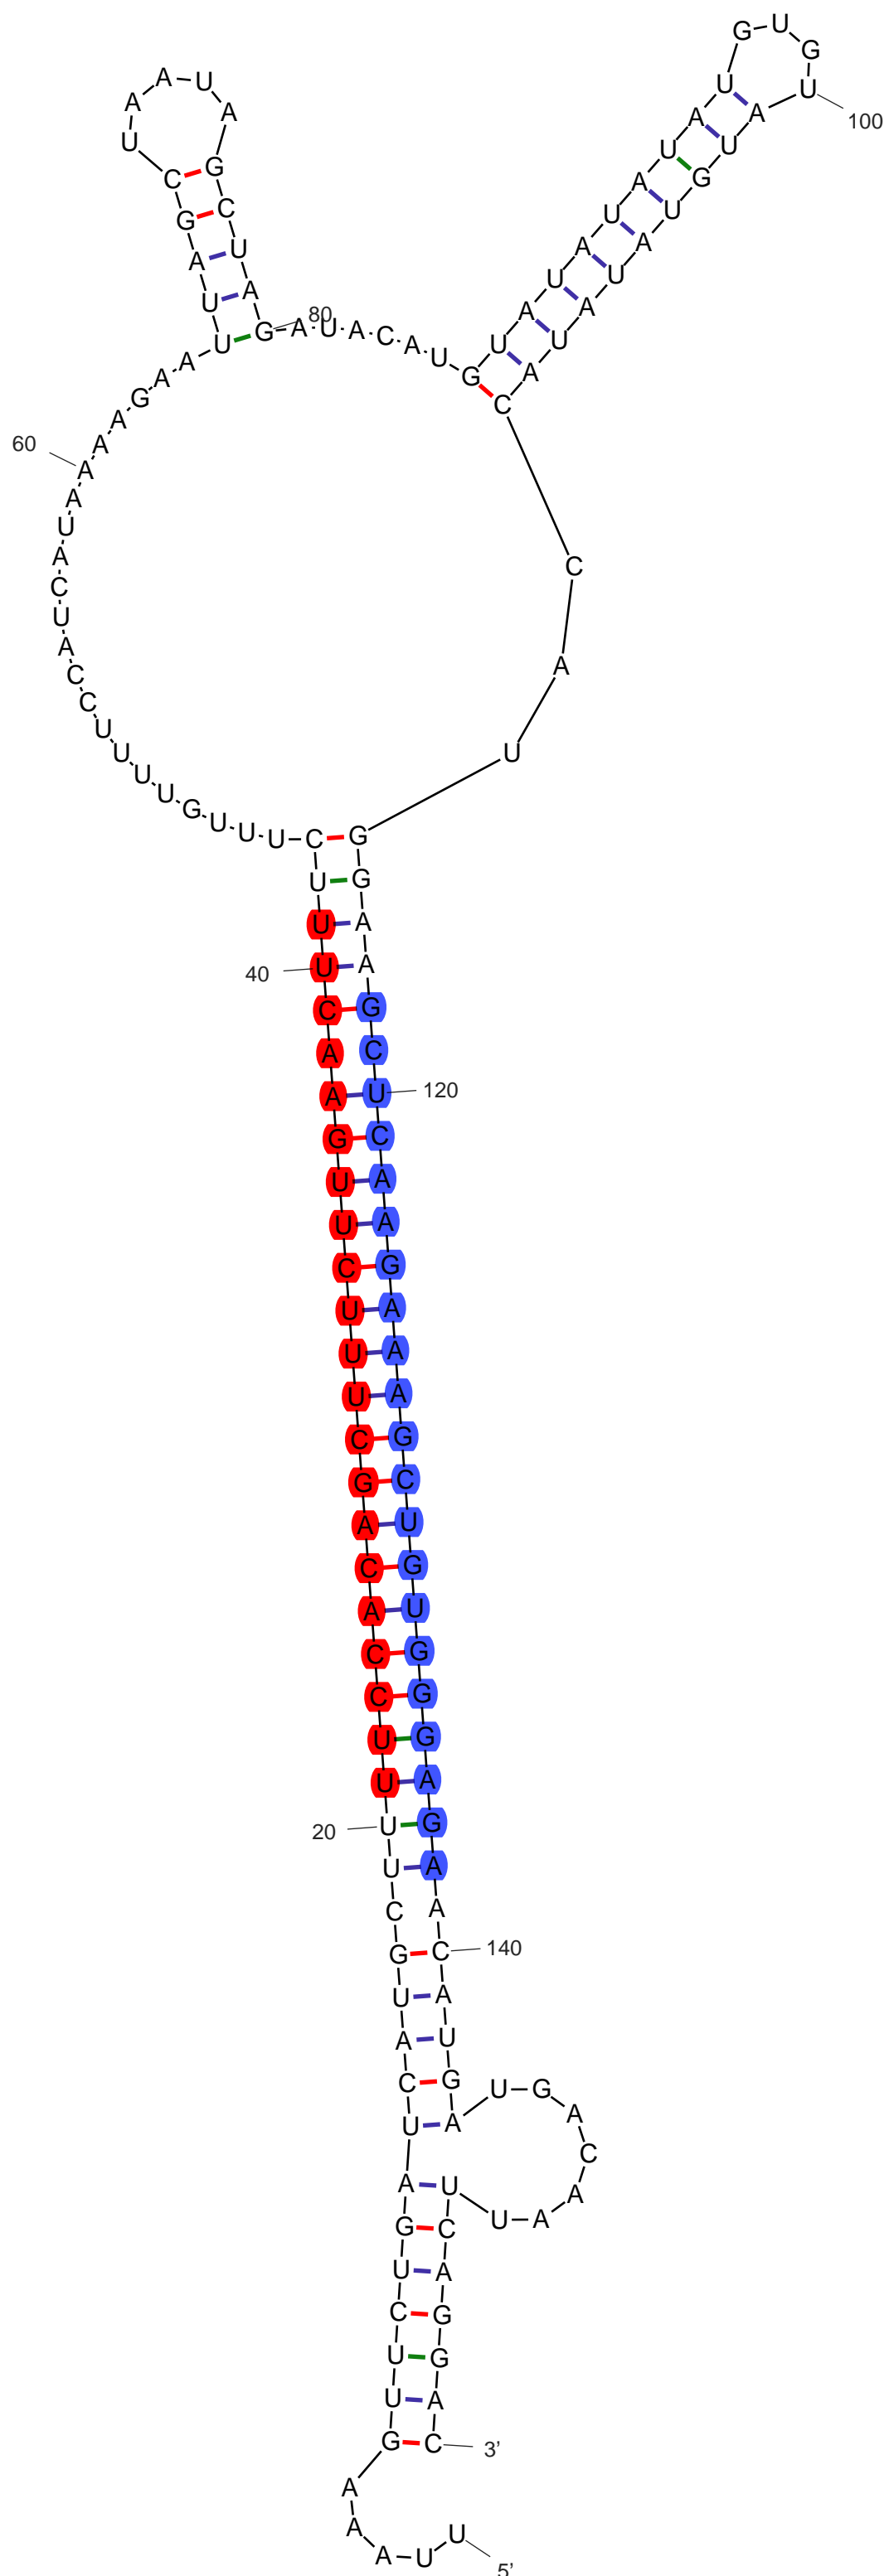

$dG = -53.99$  [Initially -59.10] 117-MIR396

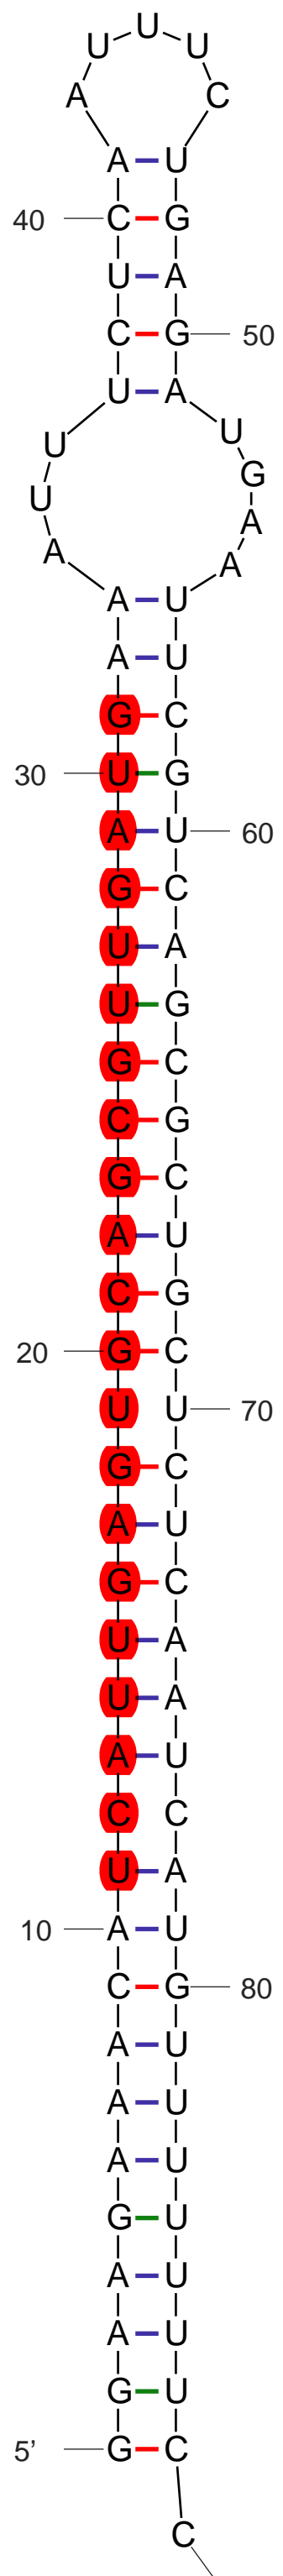

$dG = -48.40$  [Initially  $-48.40$ ] 118-MIR397

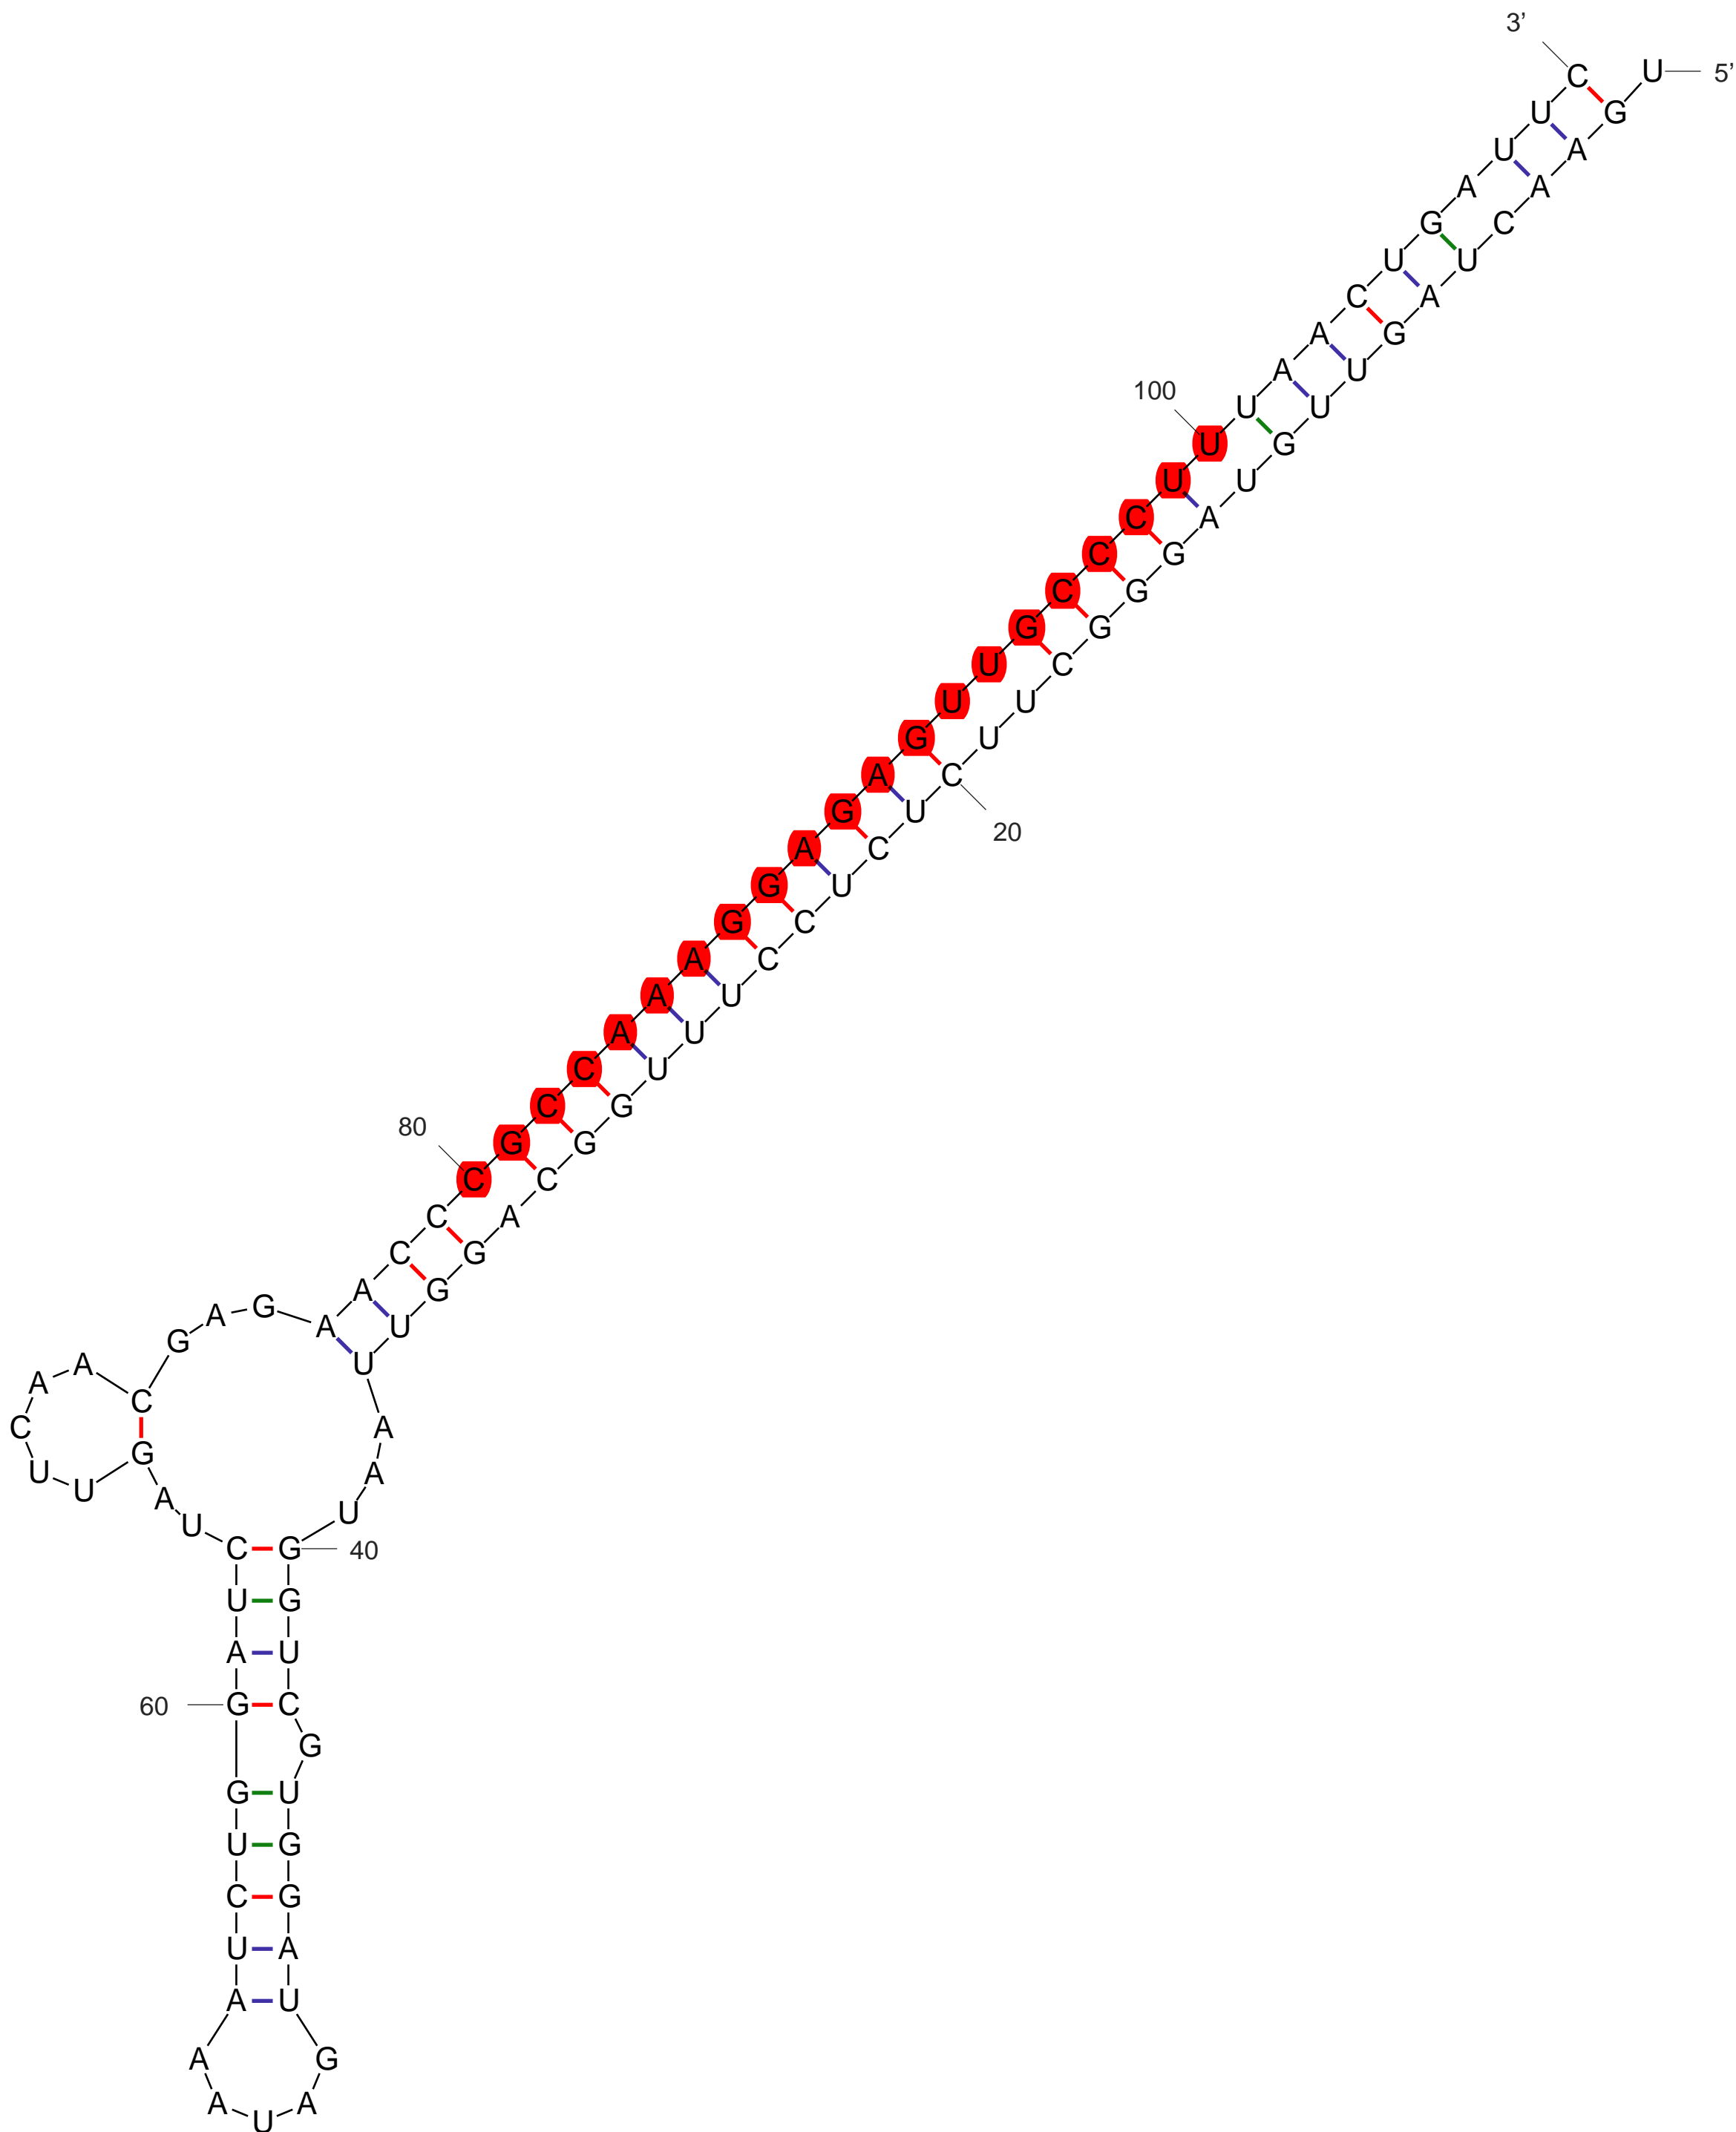

$dG = -46.88$  [Initially  $-49.70$ ] 119-MIR399

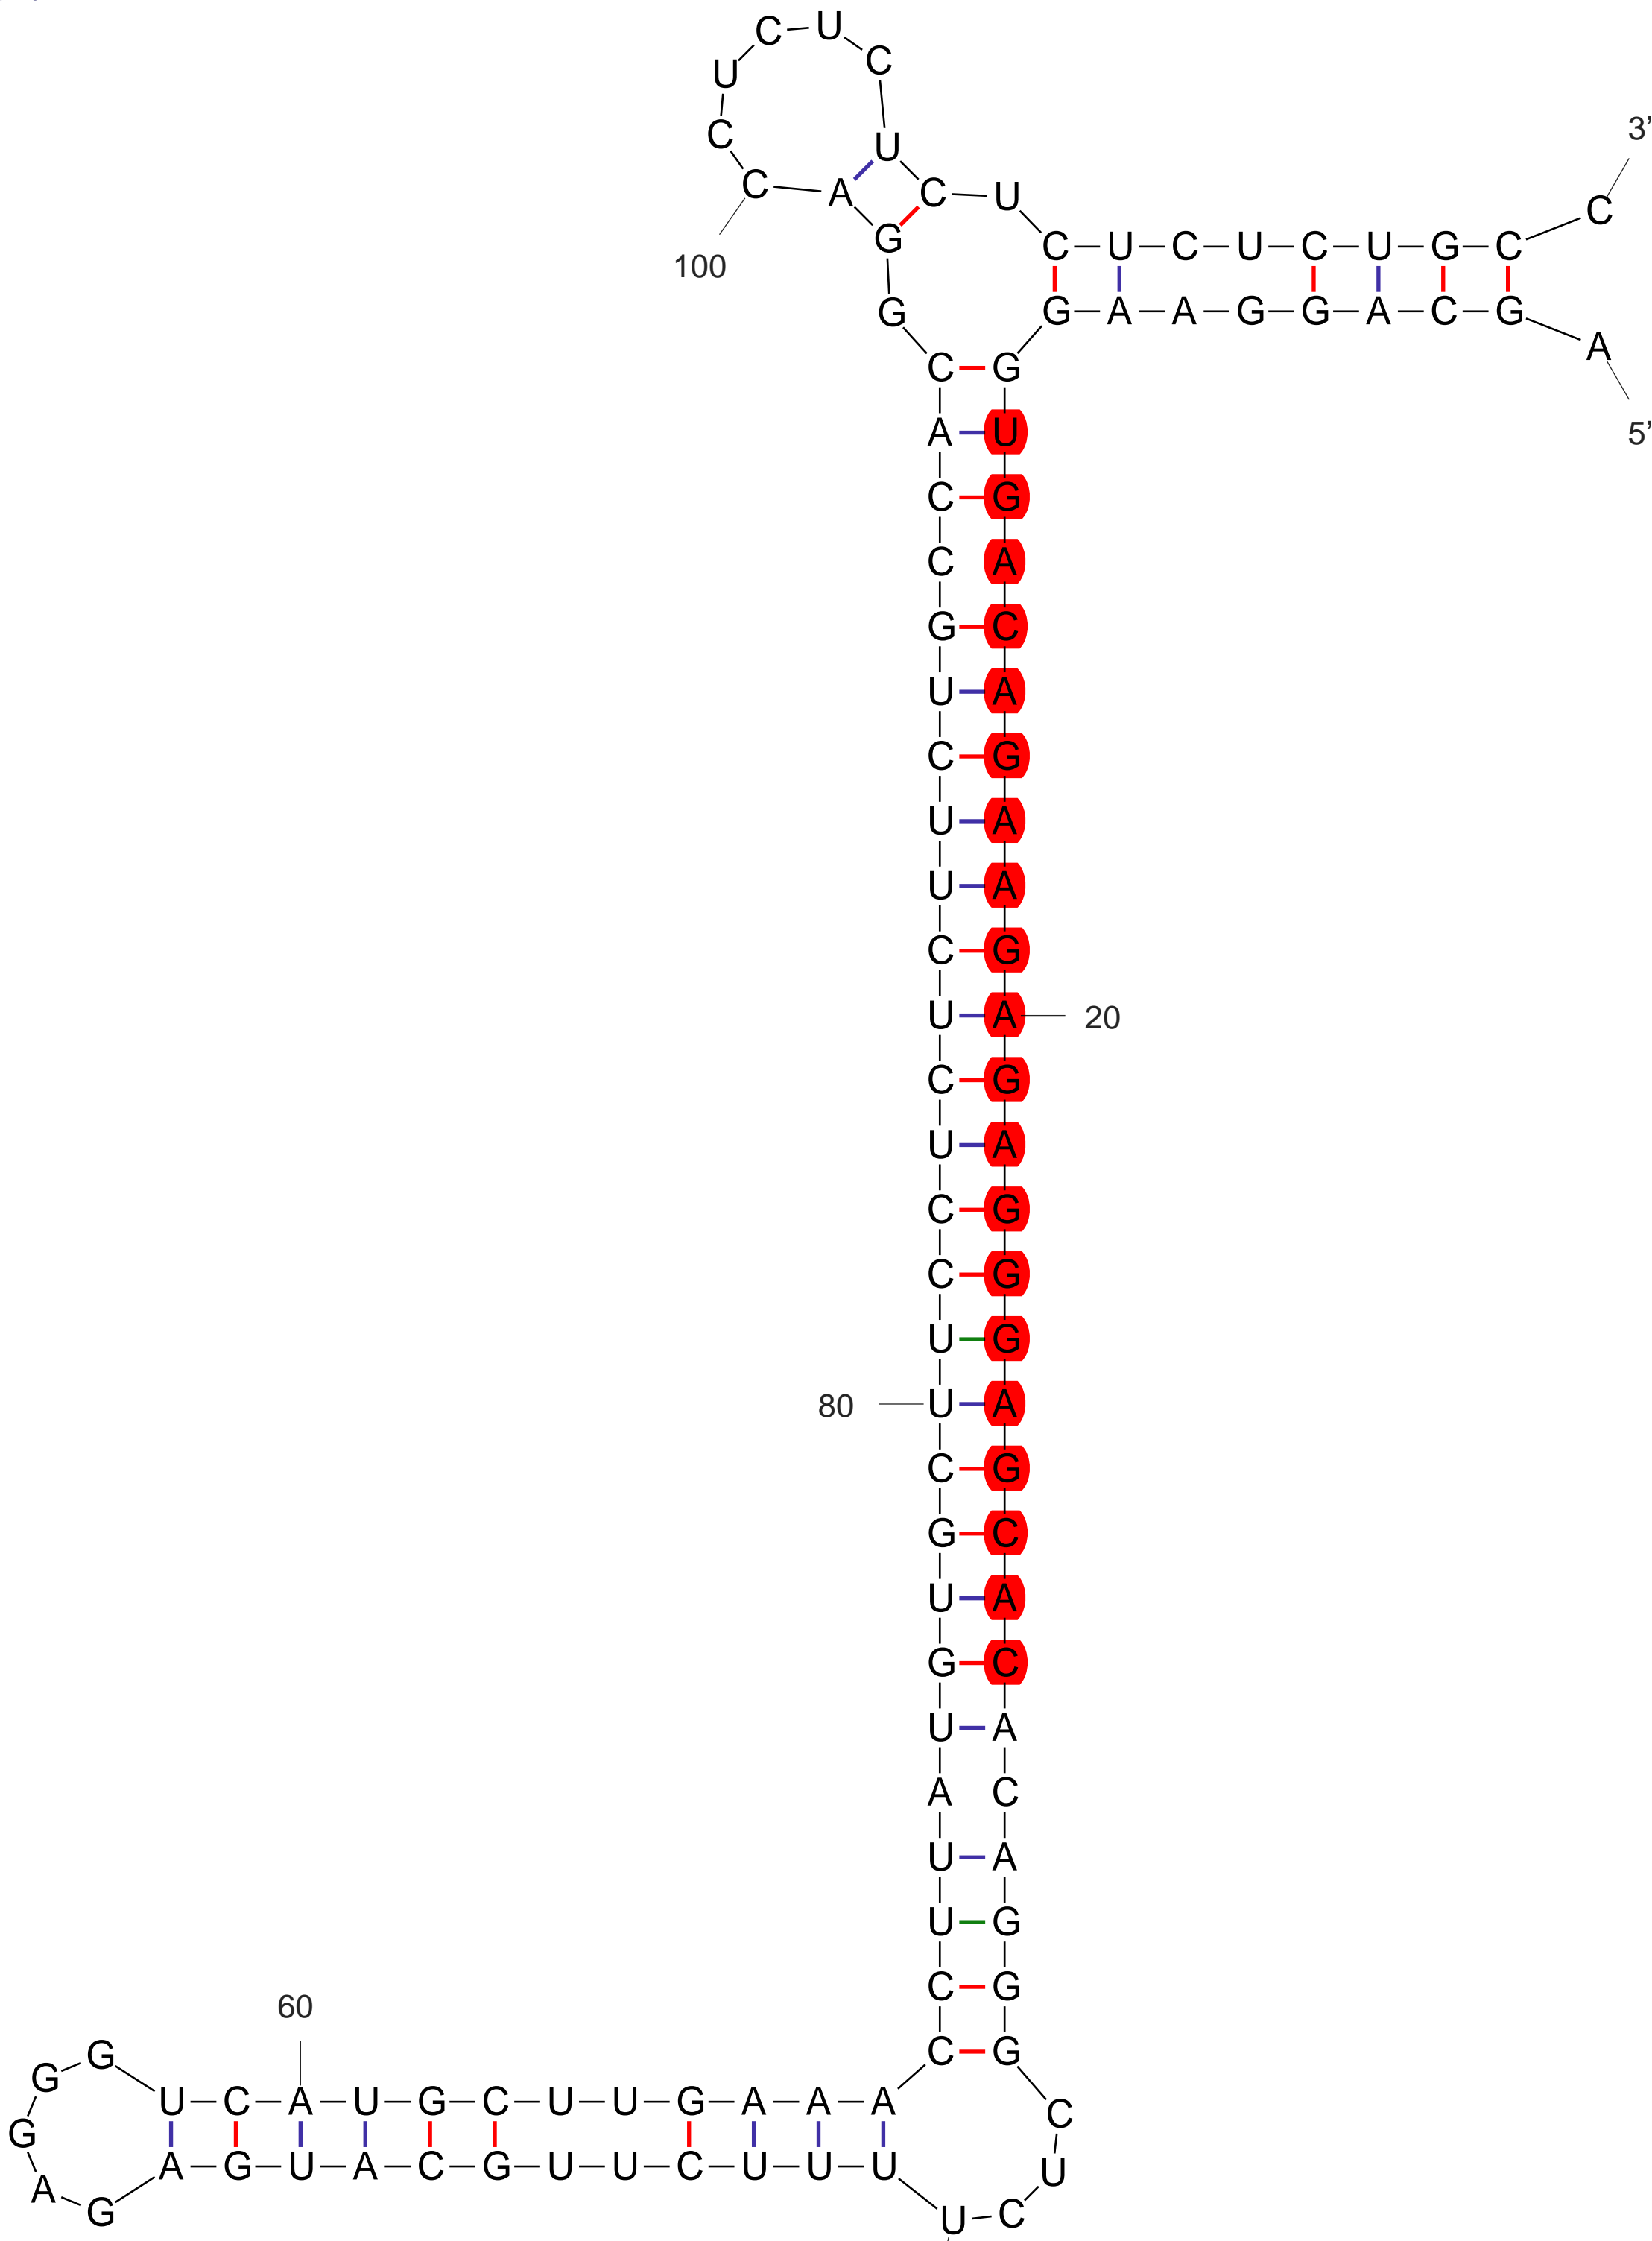

$dG = -56.30$  [Initially -58.30] 11-MIR156-[tcc-MIR156d MI0017456]

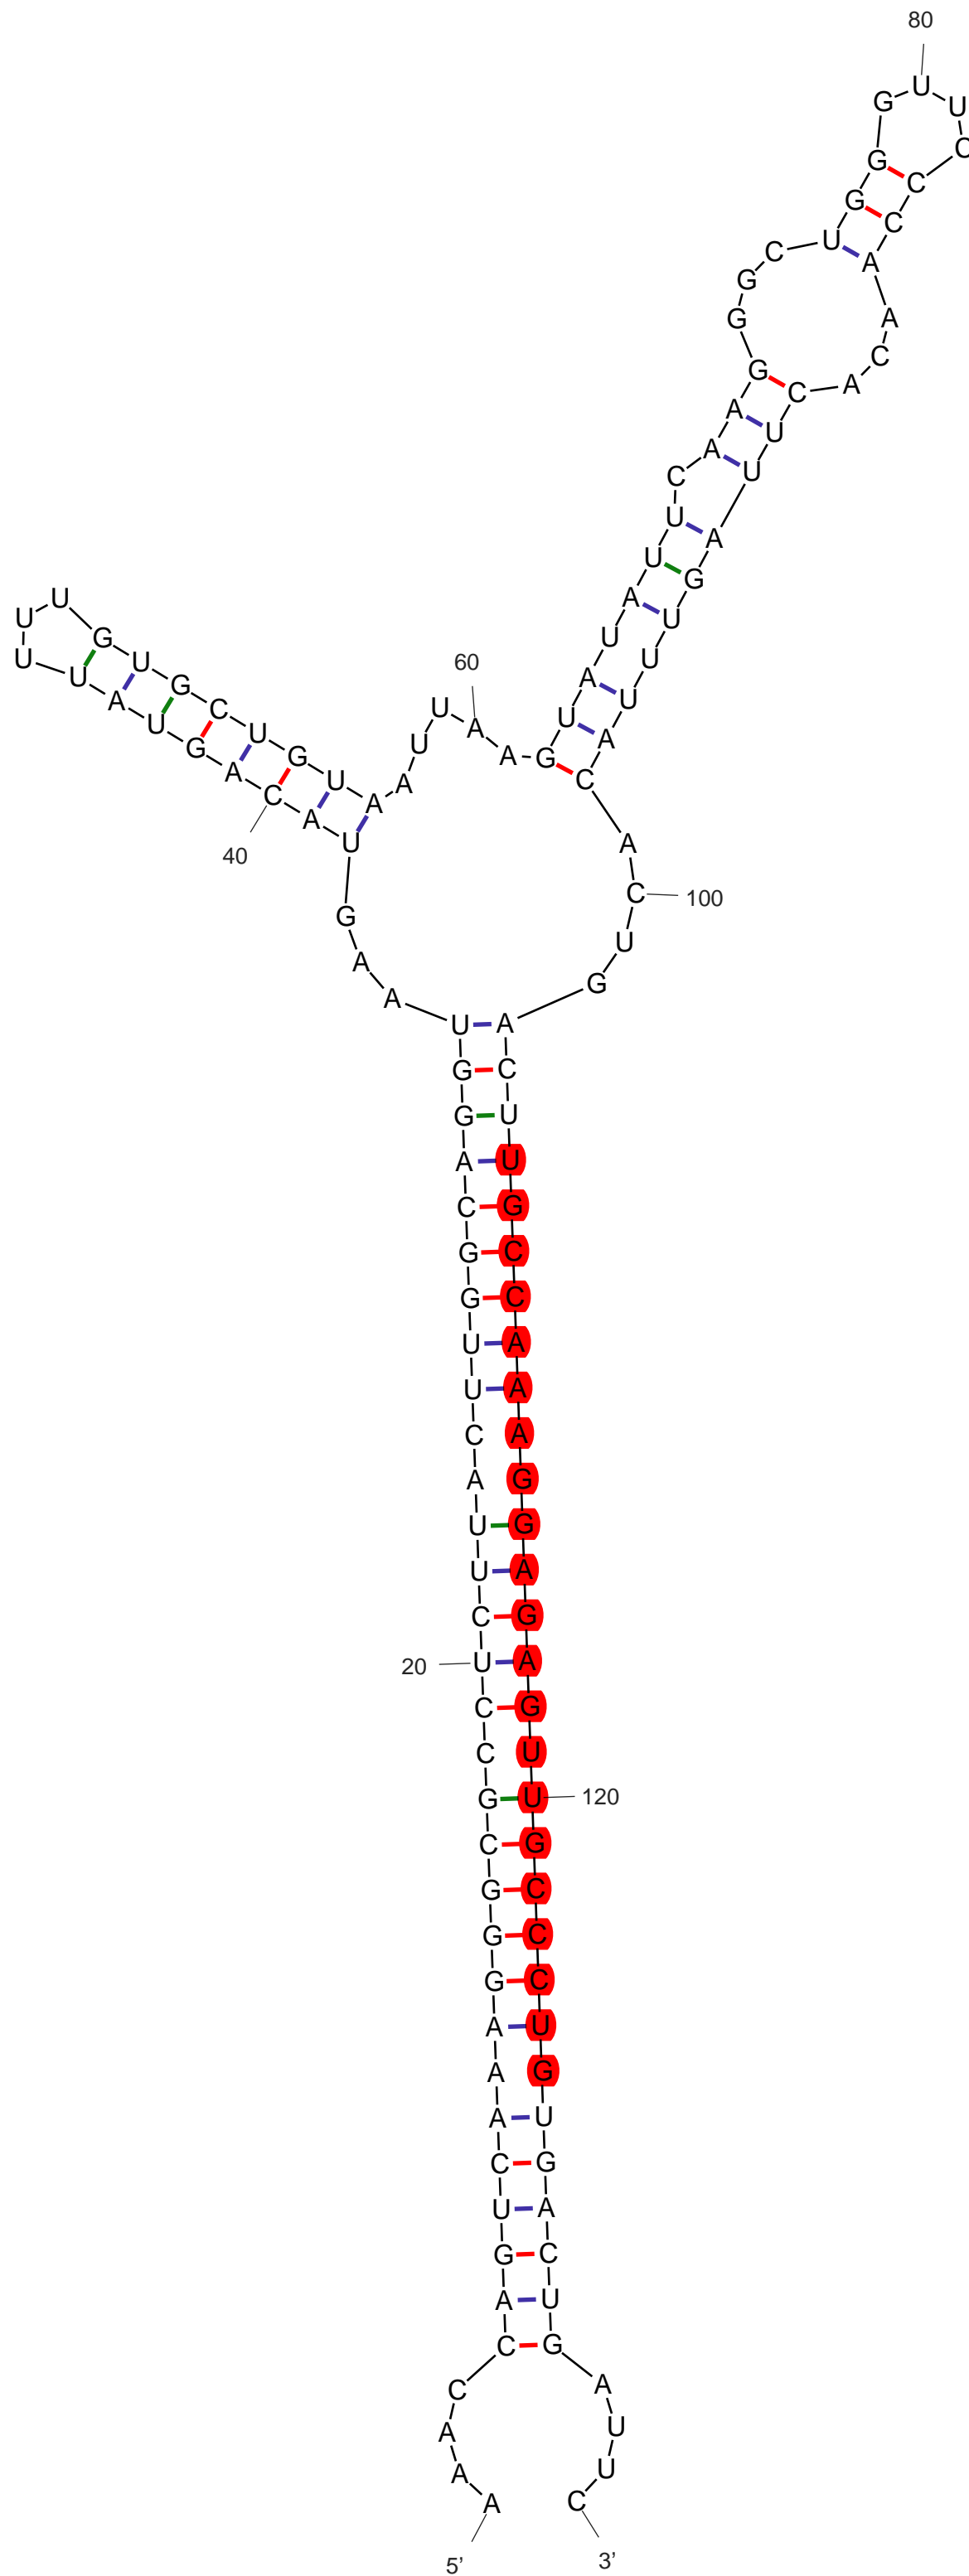

$dG = -52.94$  [Initially  $-56.40$ ] 120-MIR399

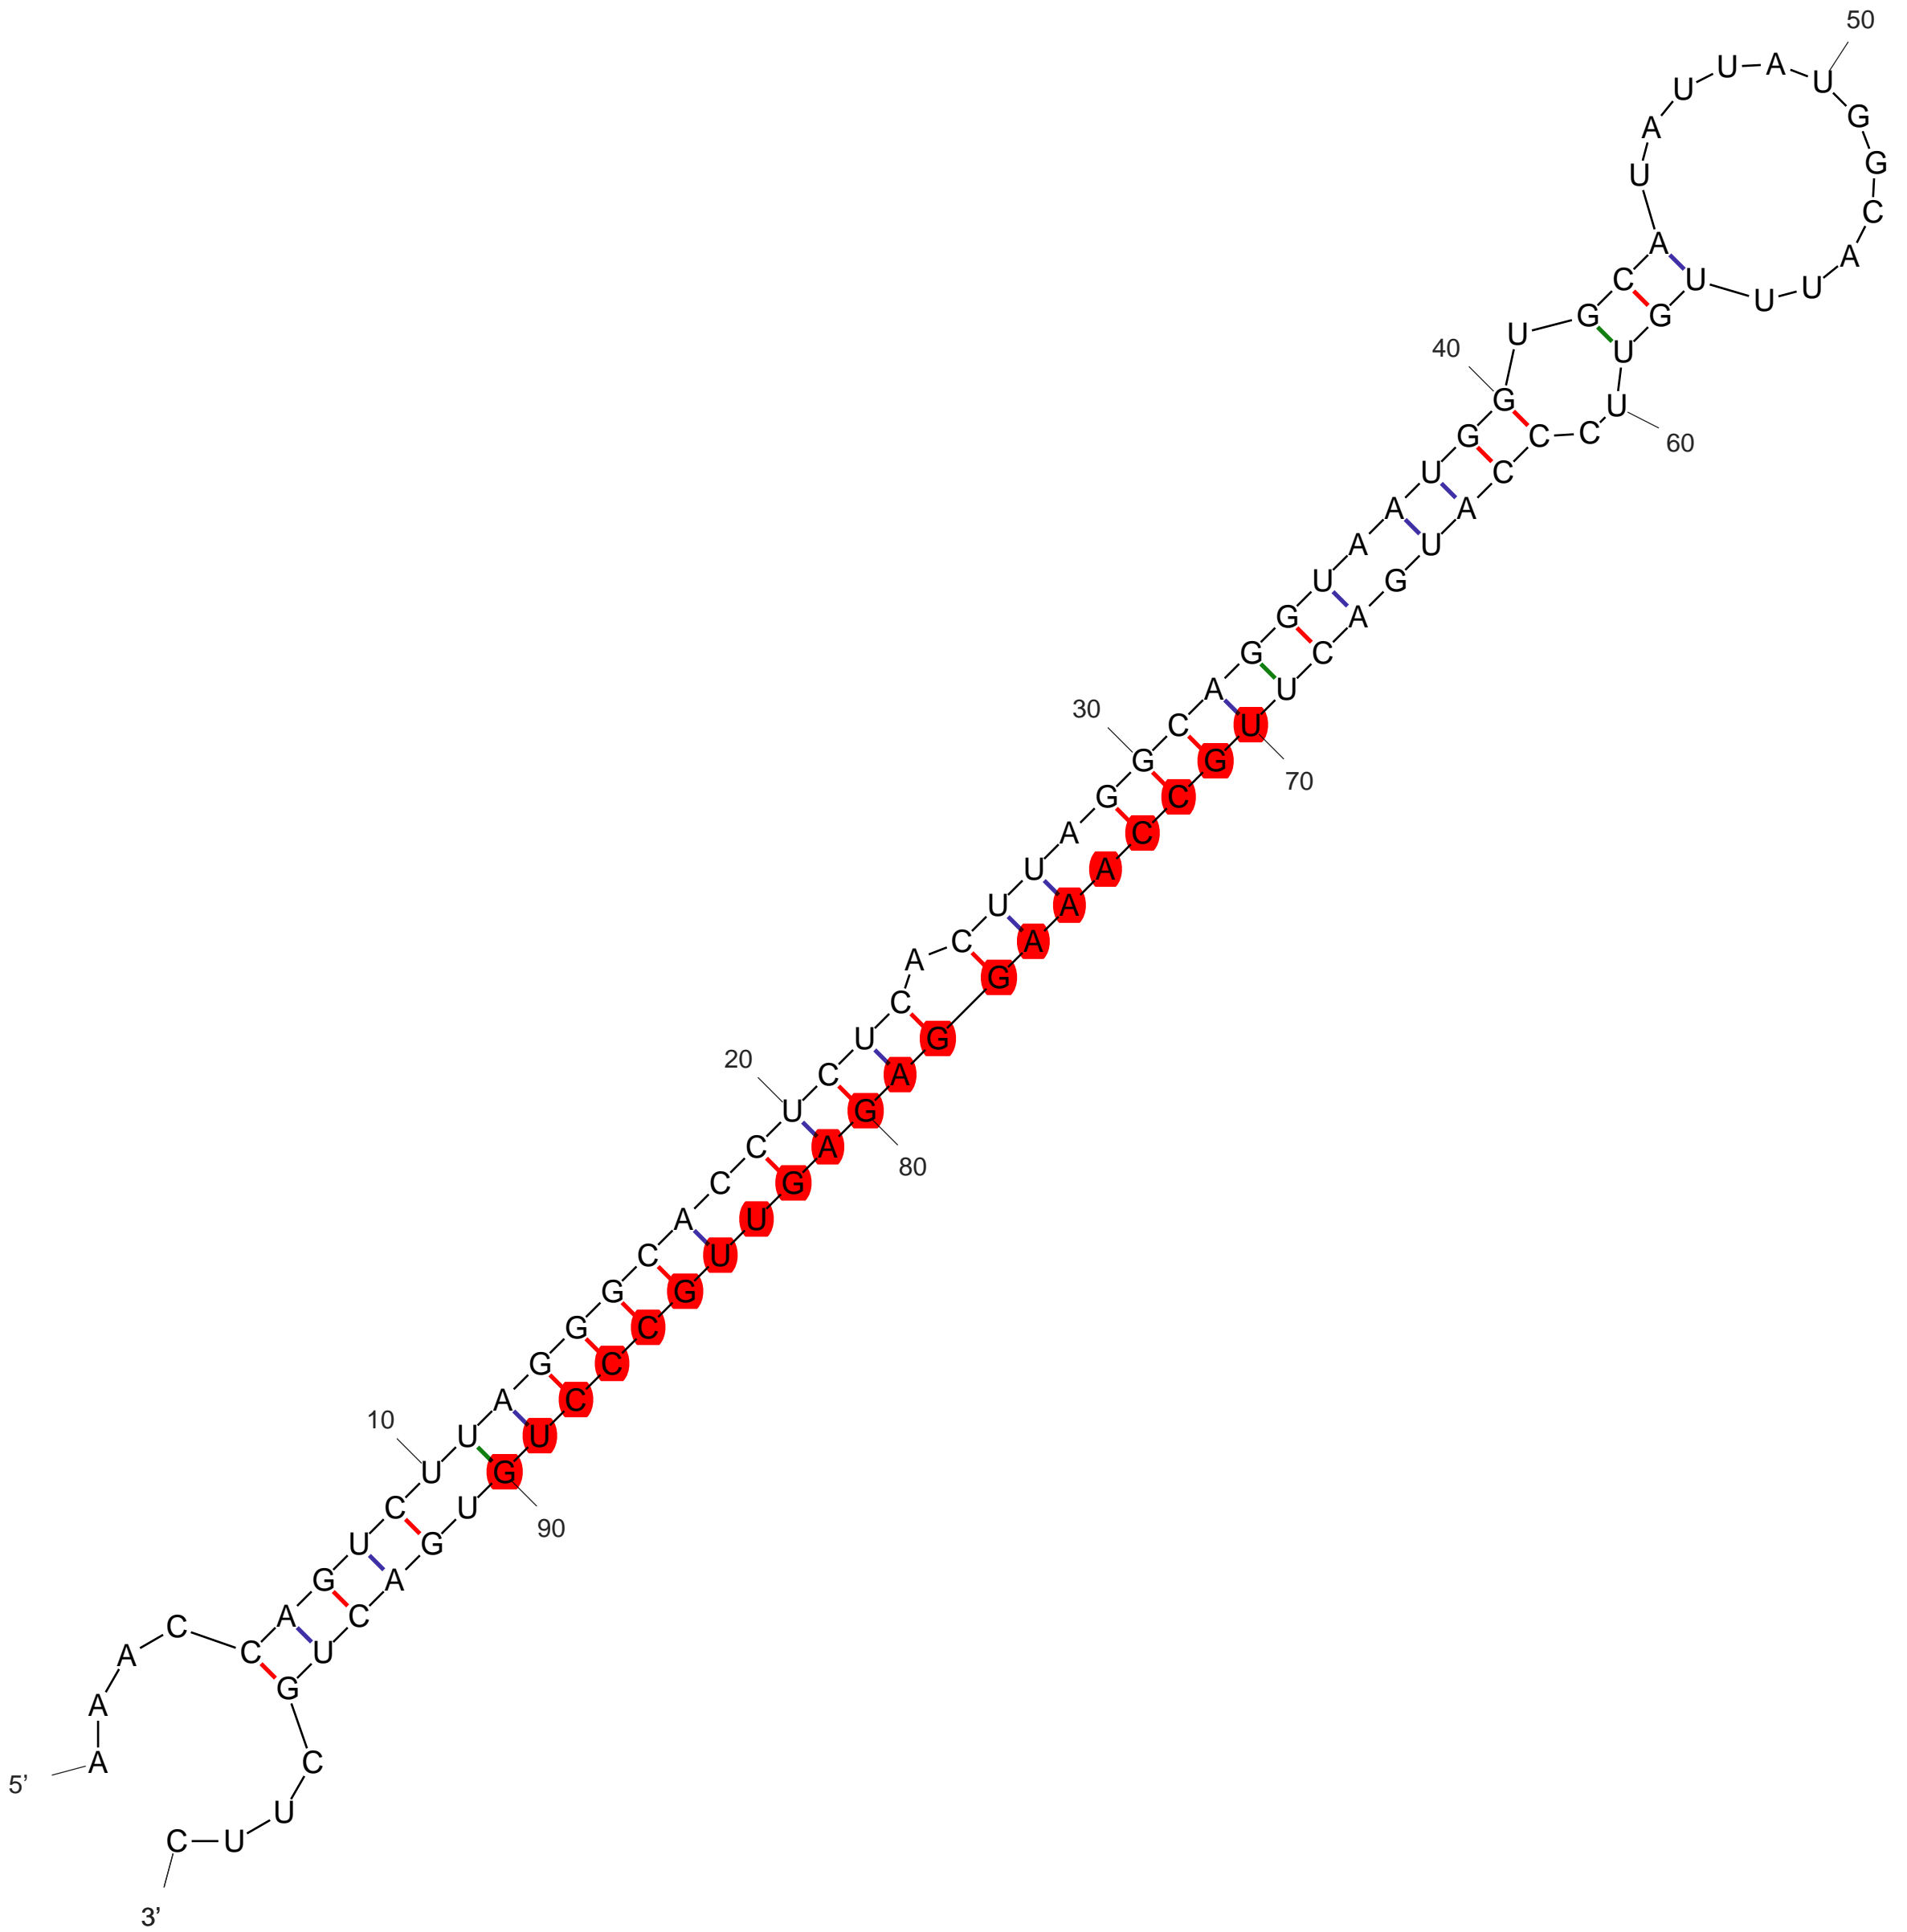

$dG = -47.90$  [Initially -47.90] 121-MIR399

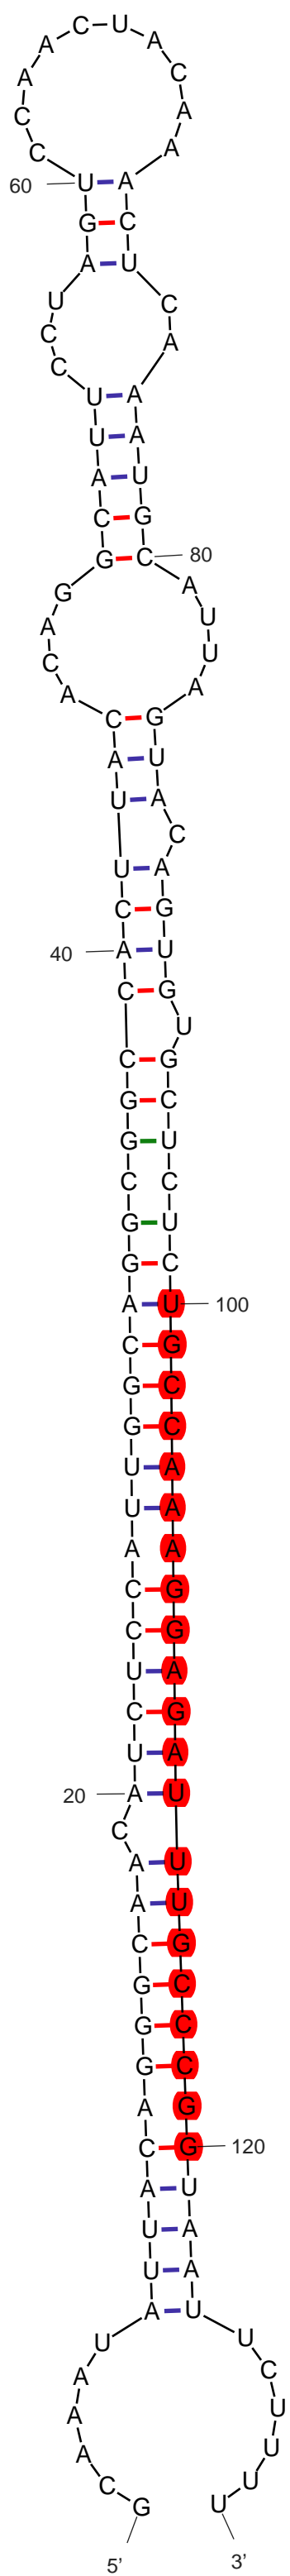

$dG = -51.50$  [Initially  $-51.50$ ] 123-MIR399

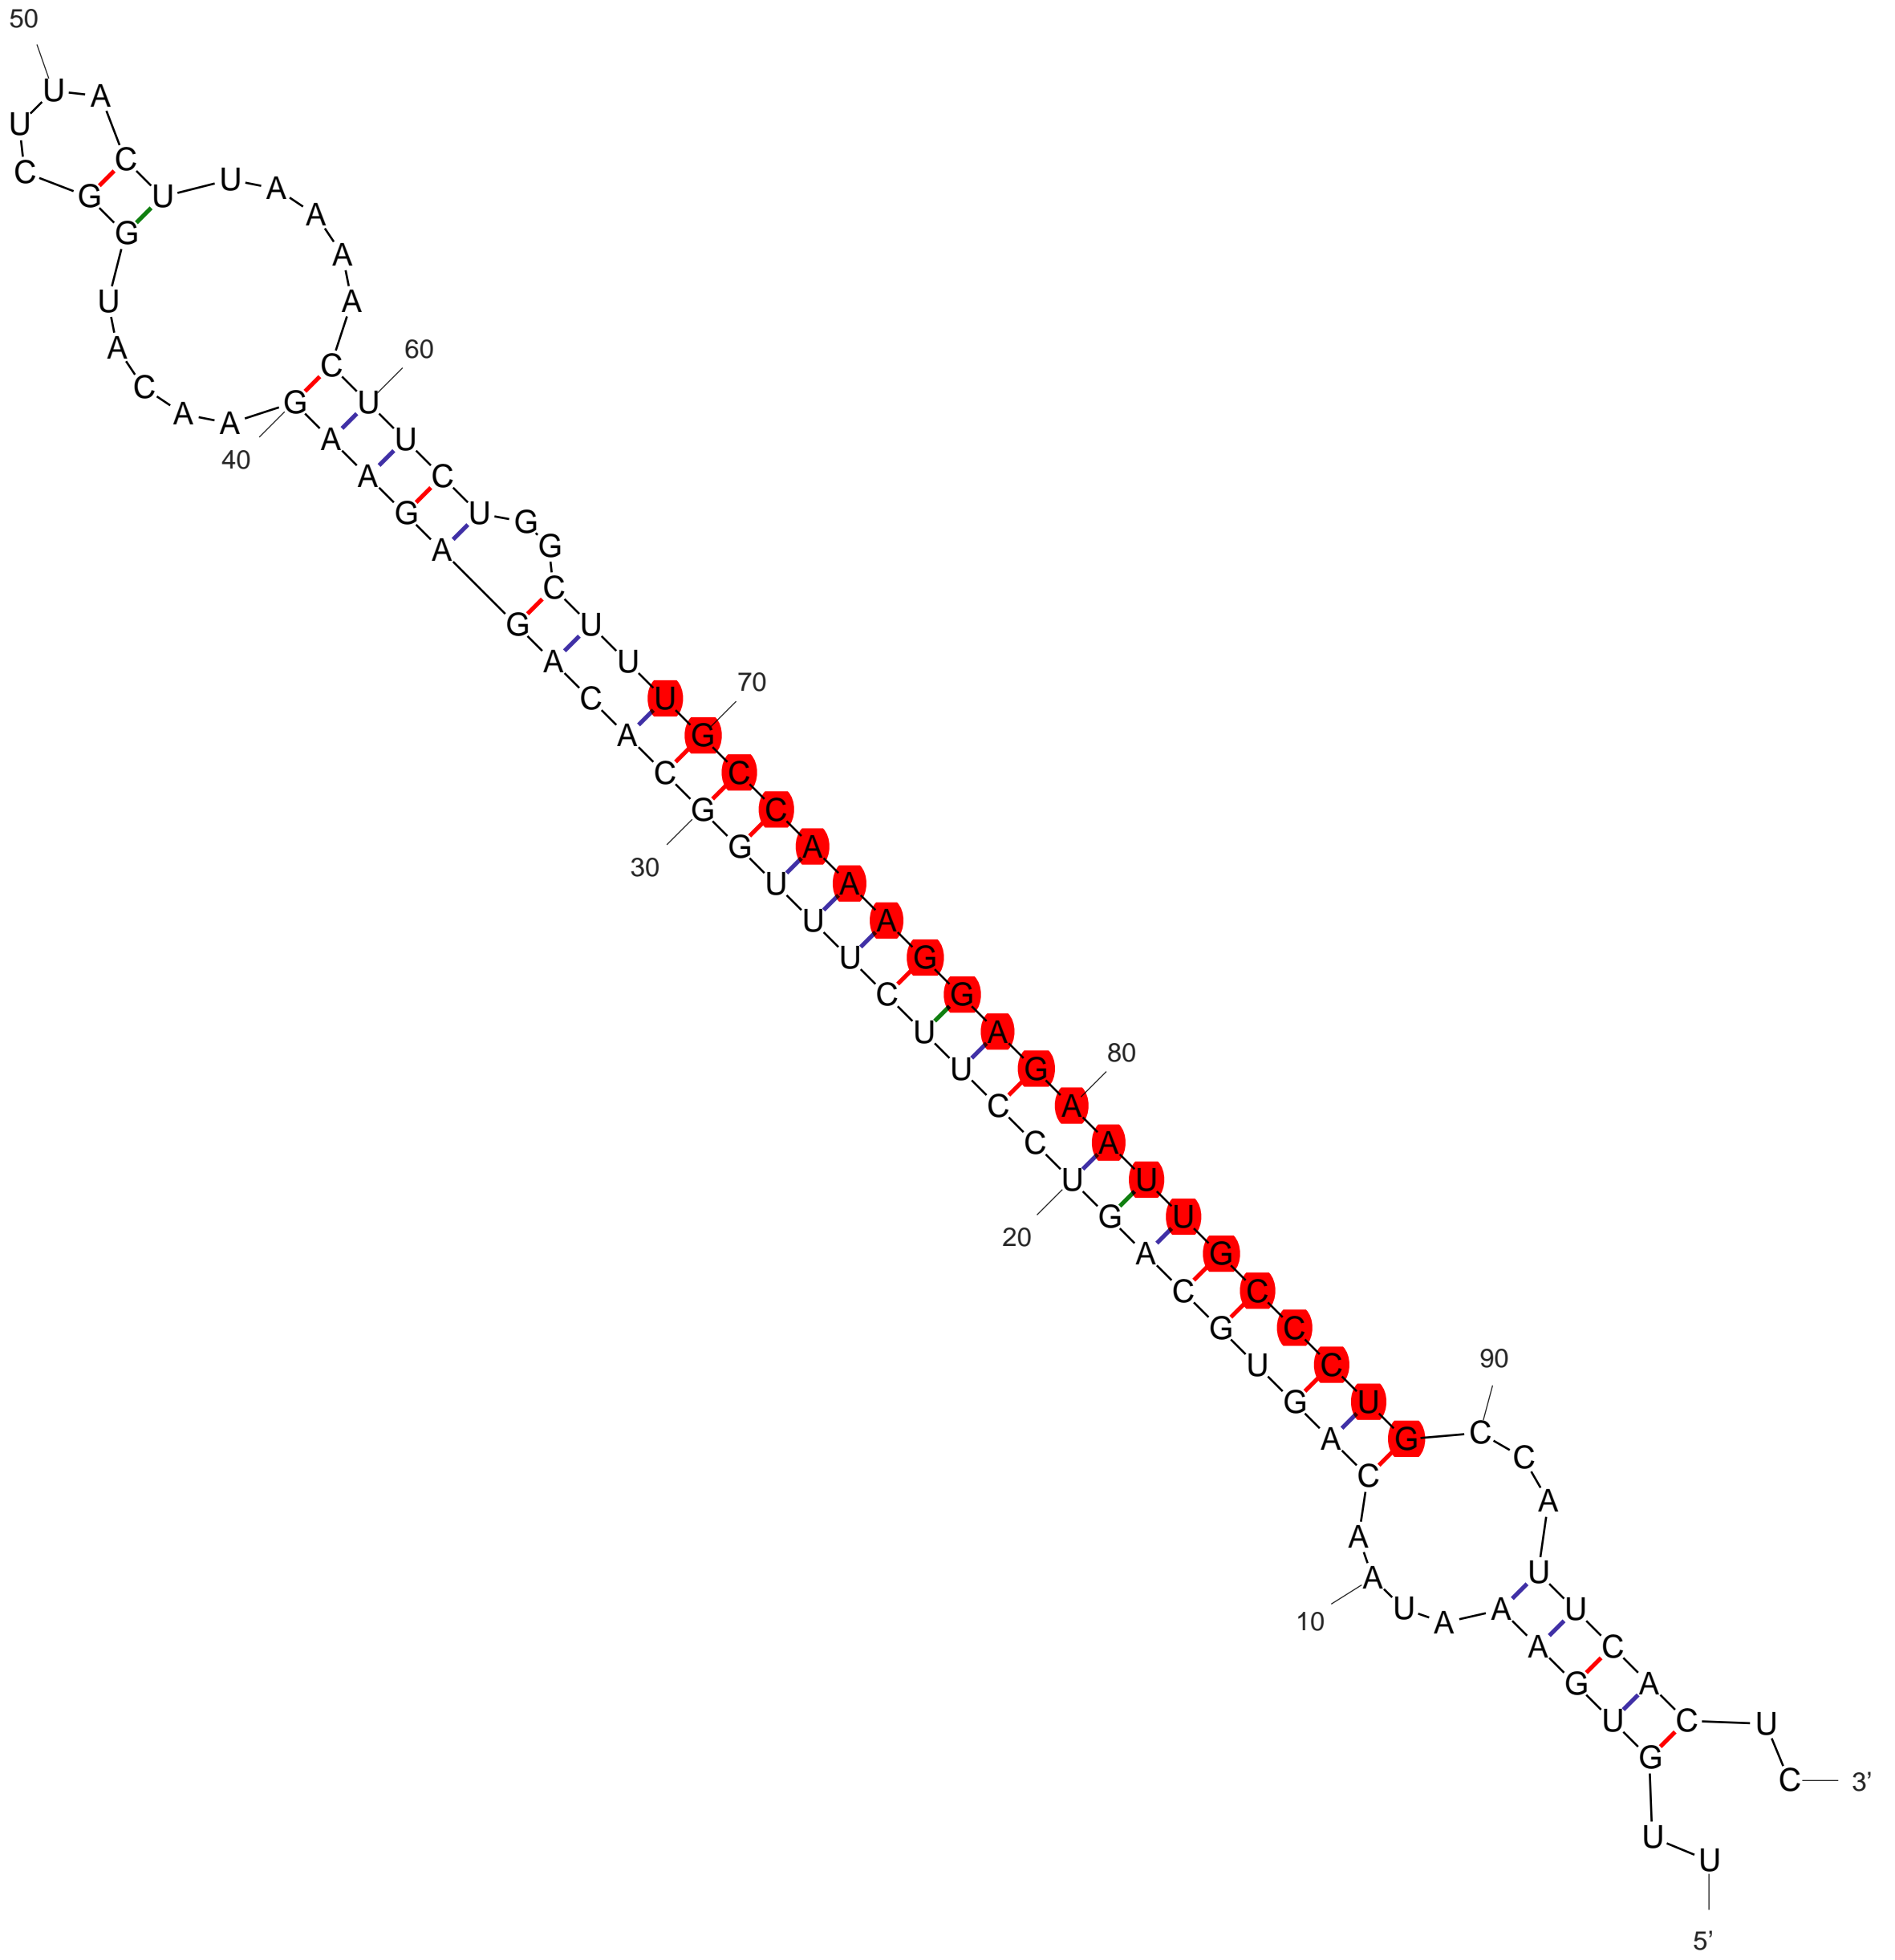



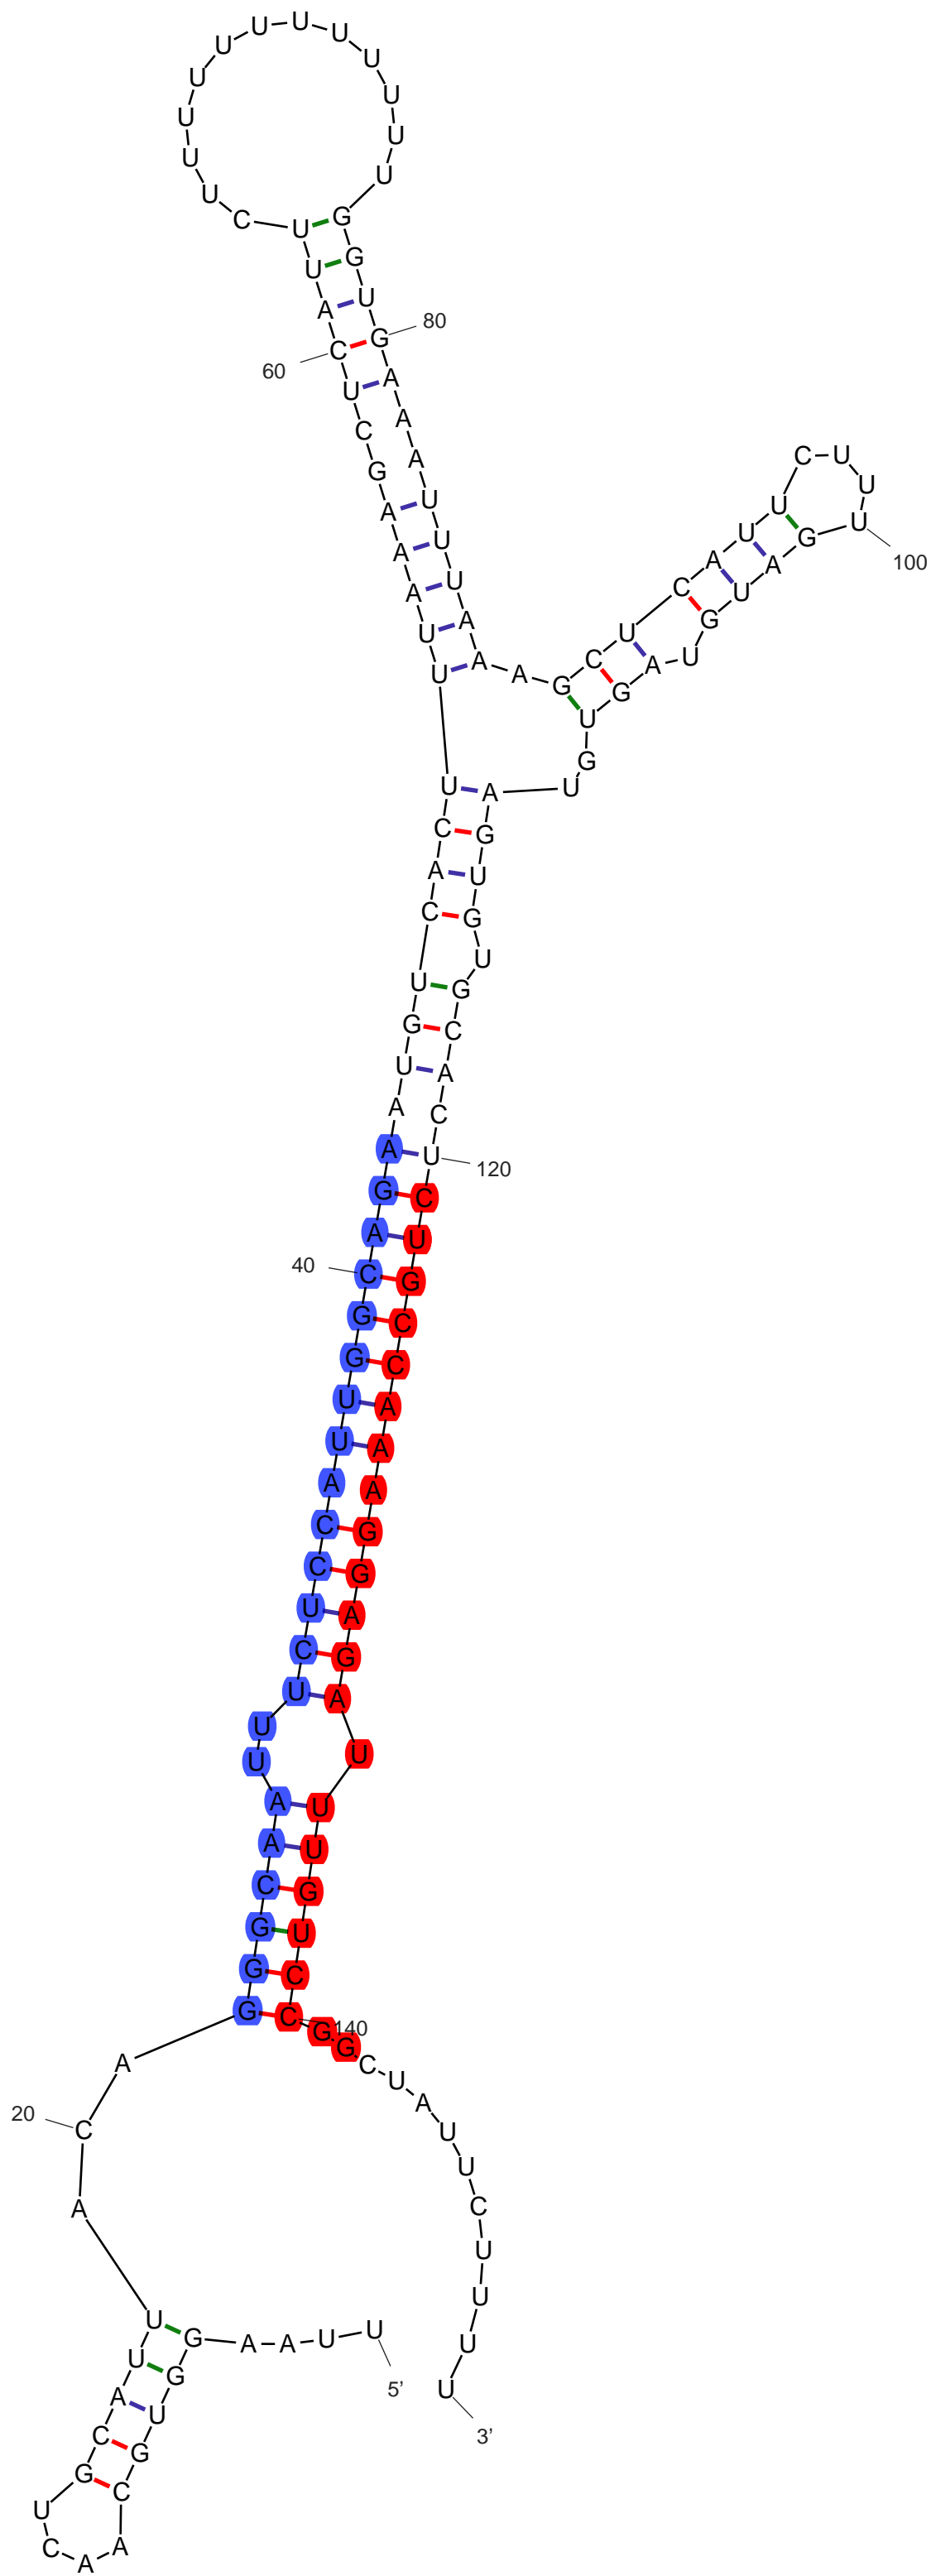

**dG = -45.30 [Initially -45.90] 125-MIR399**

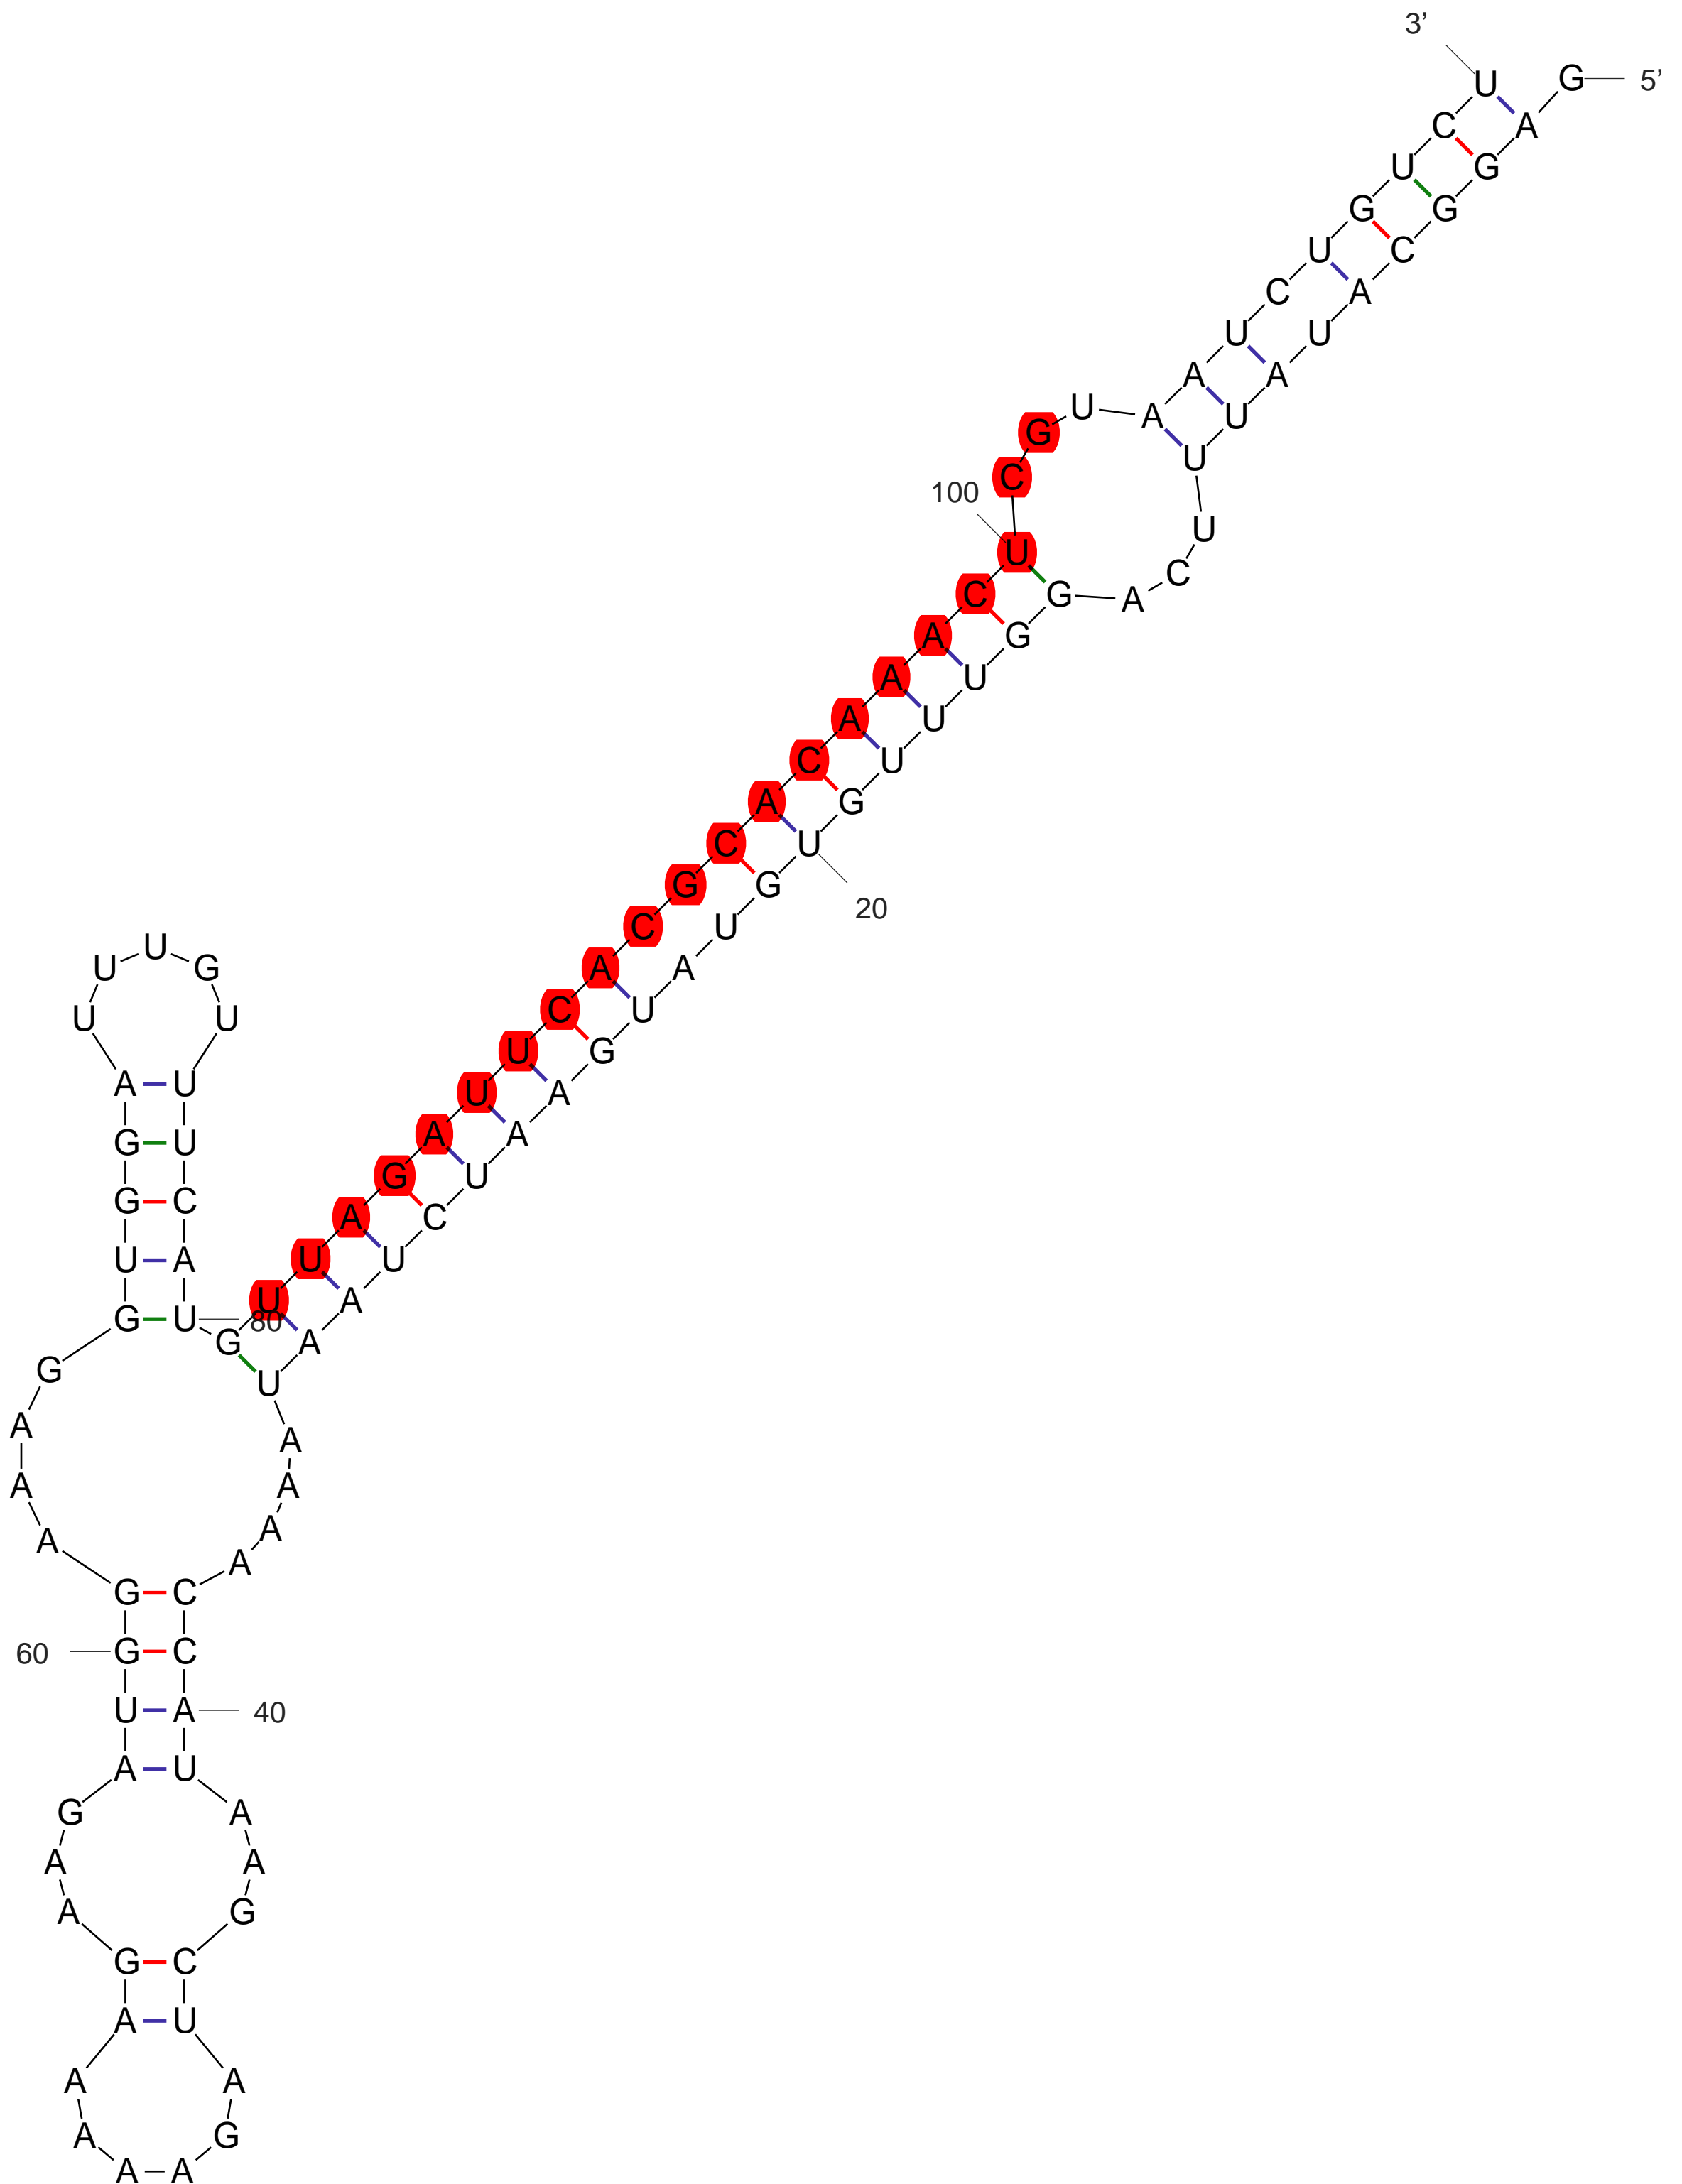

$dG = -33.08$  [Initially -36.20] 126-MIR403-[tcc-MIR403a MI0017528]



$dG = -43.08$  [Initially -46.30] 127-MIR403

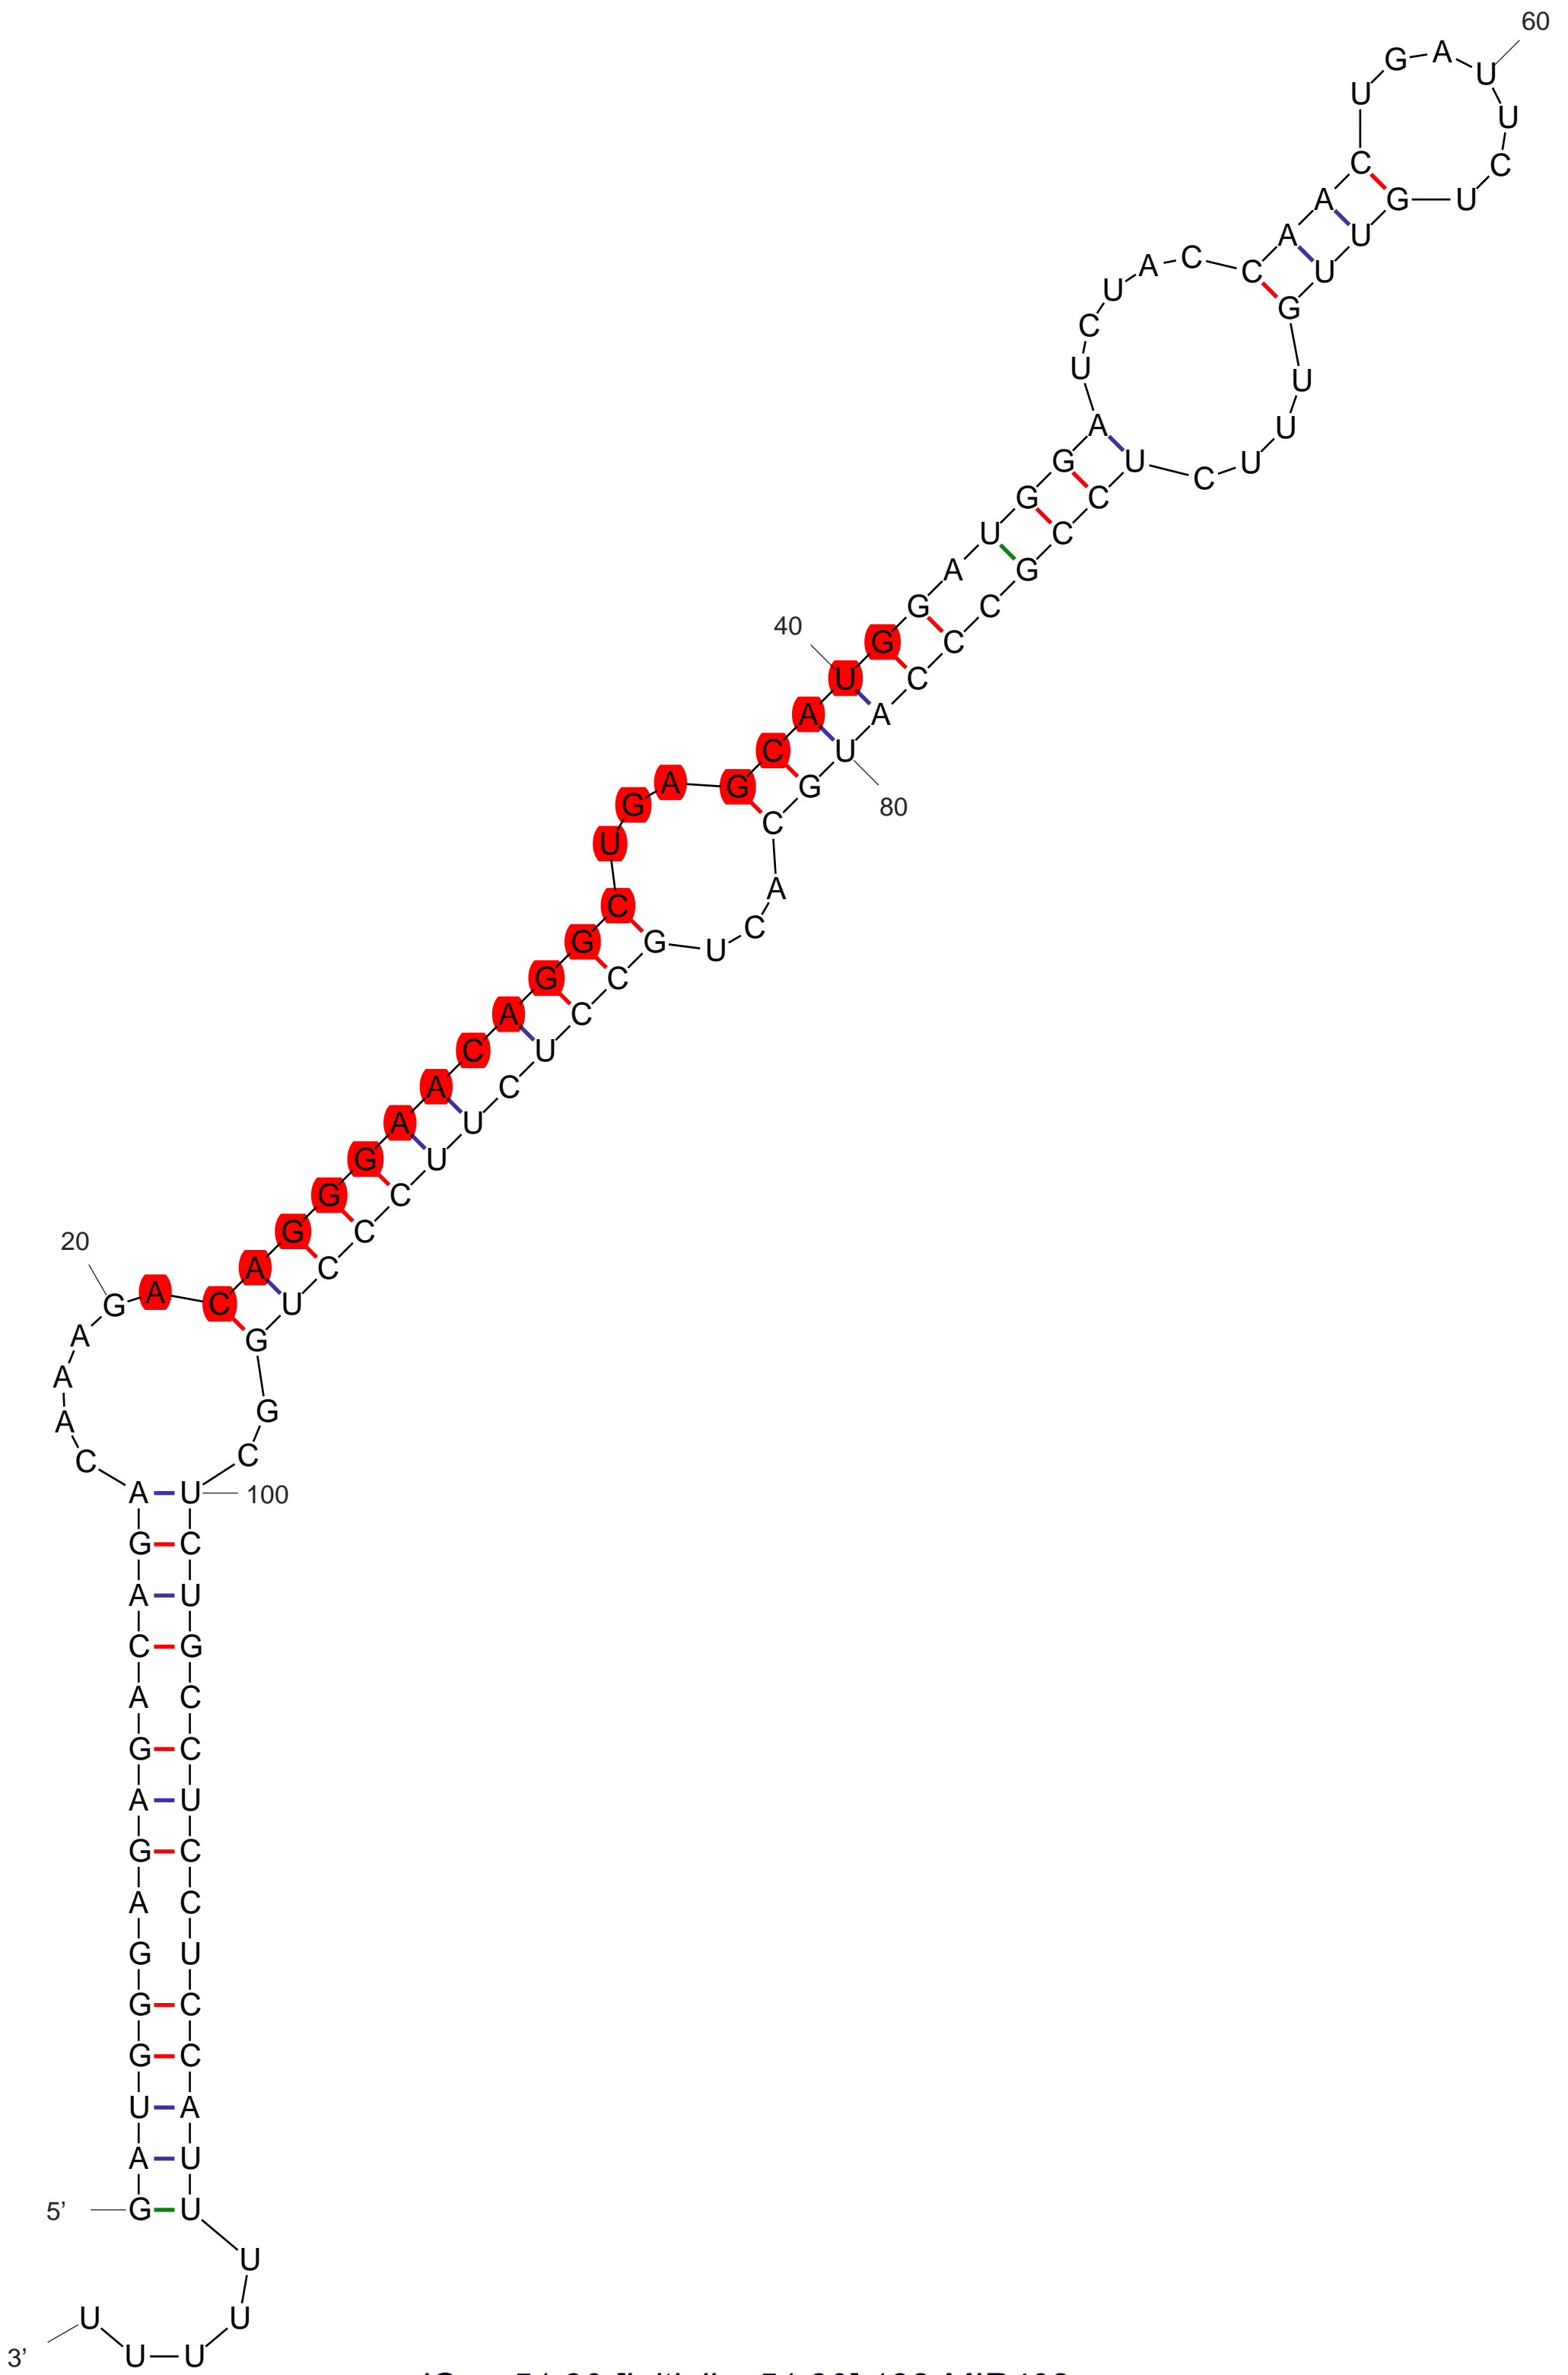

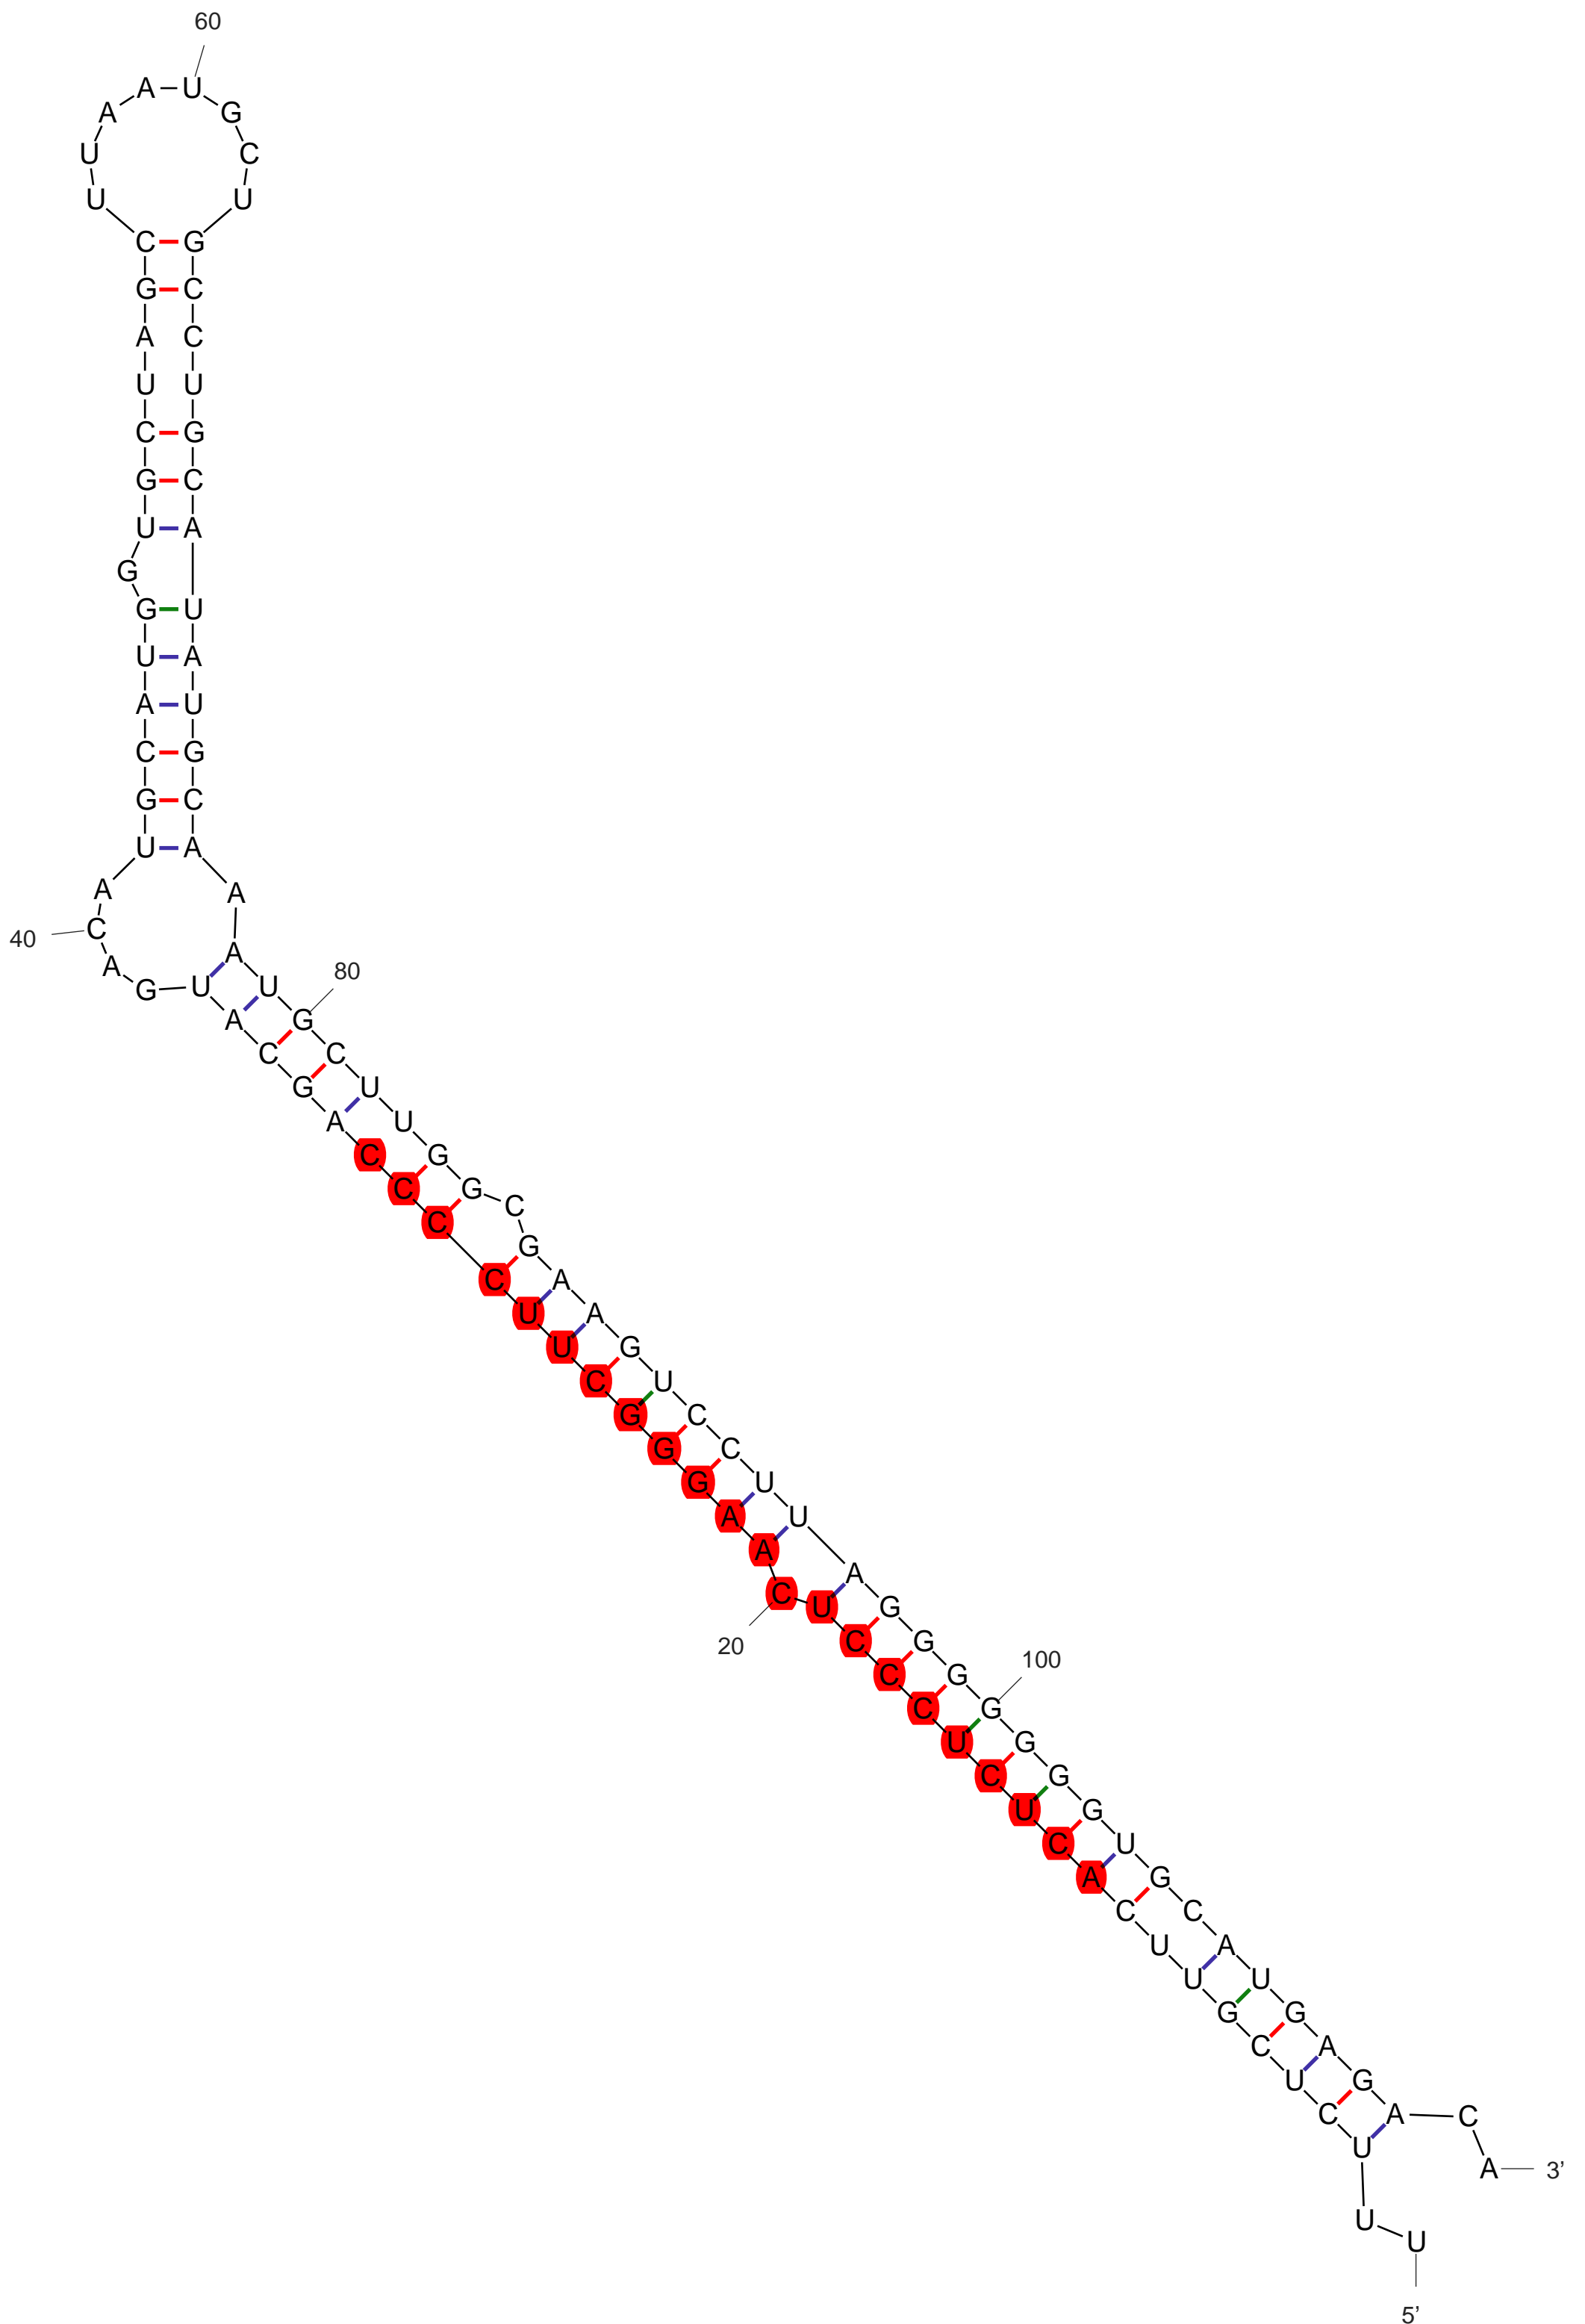

*dG = -60.20 [Initially -60.20] 129-MIR477*

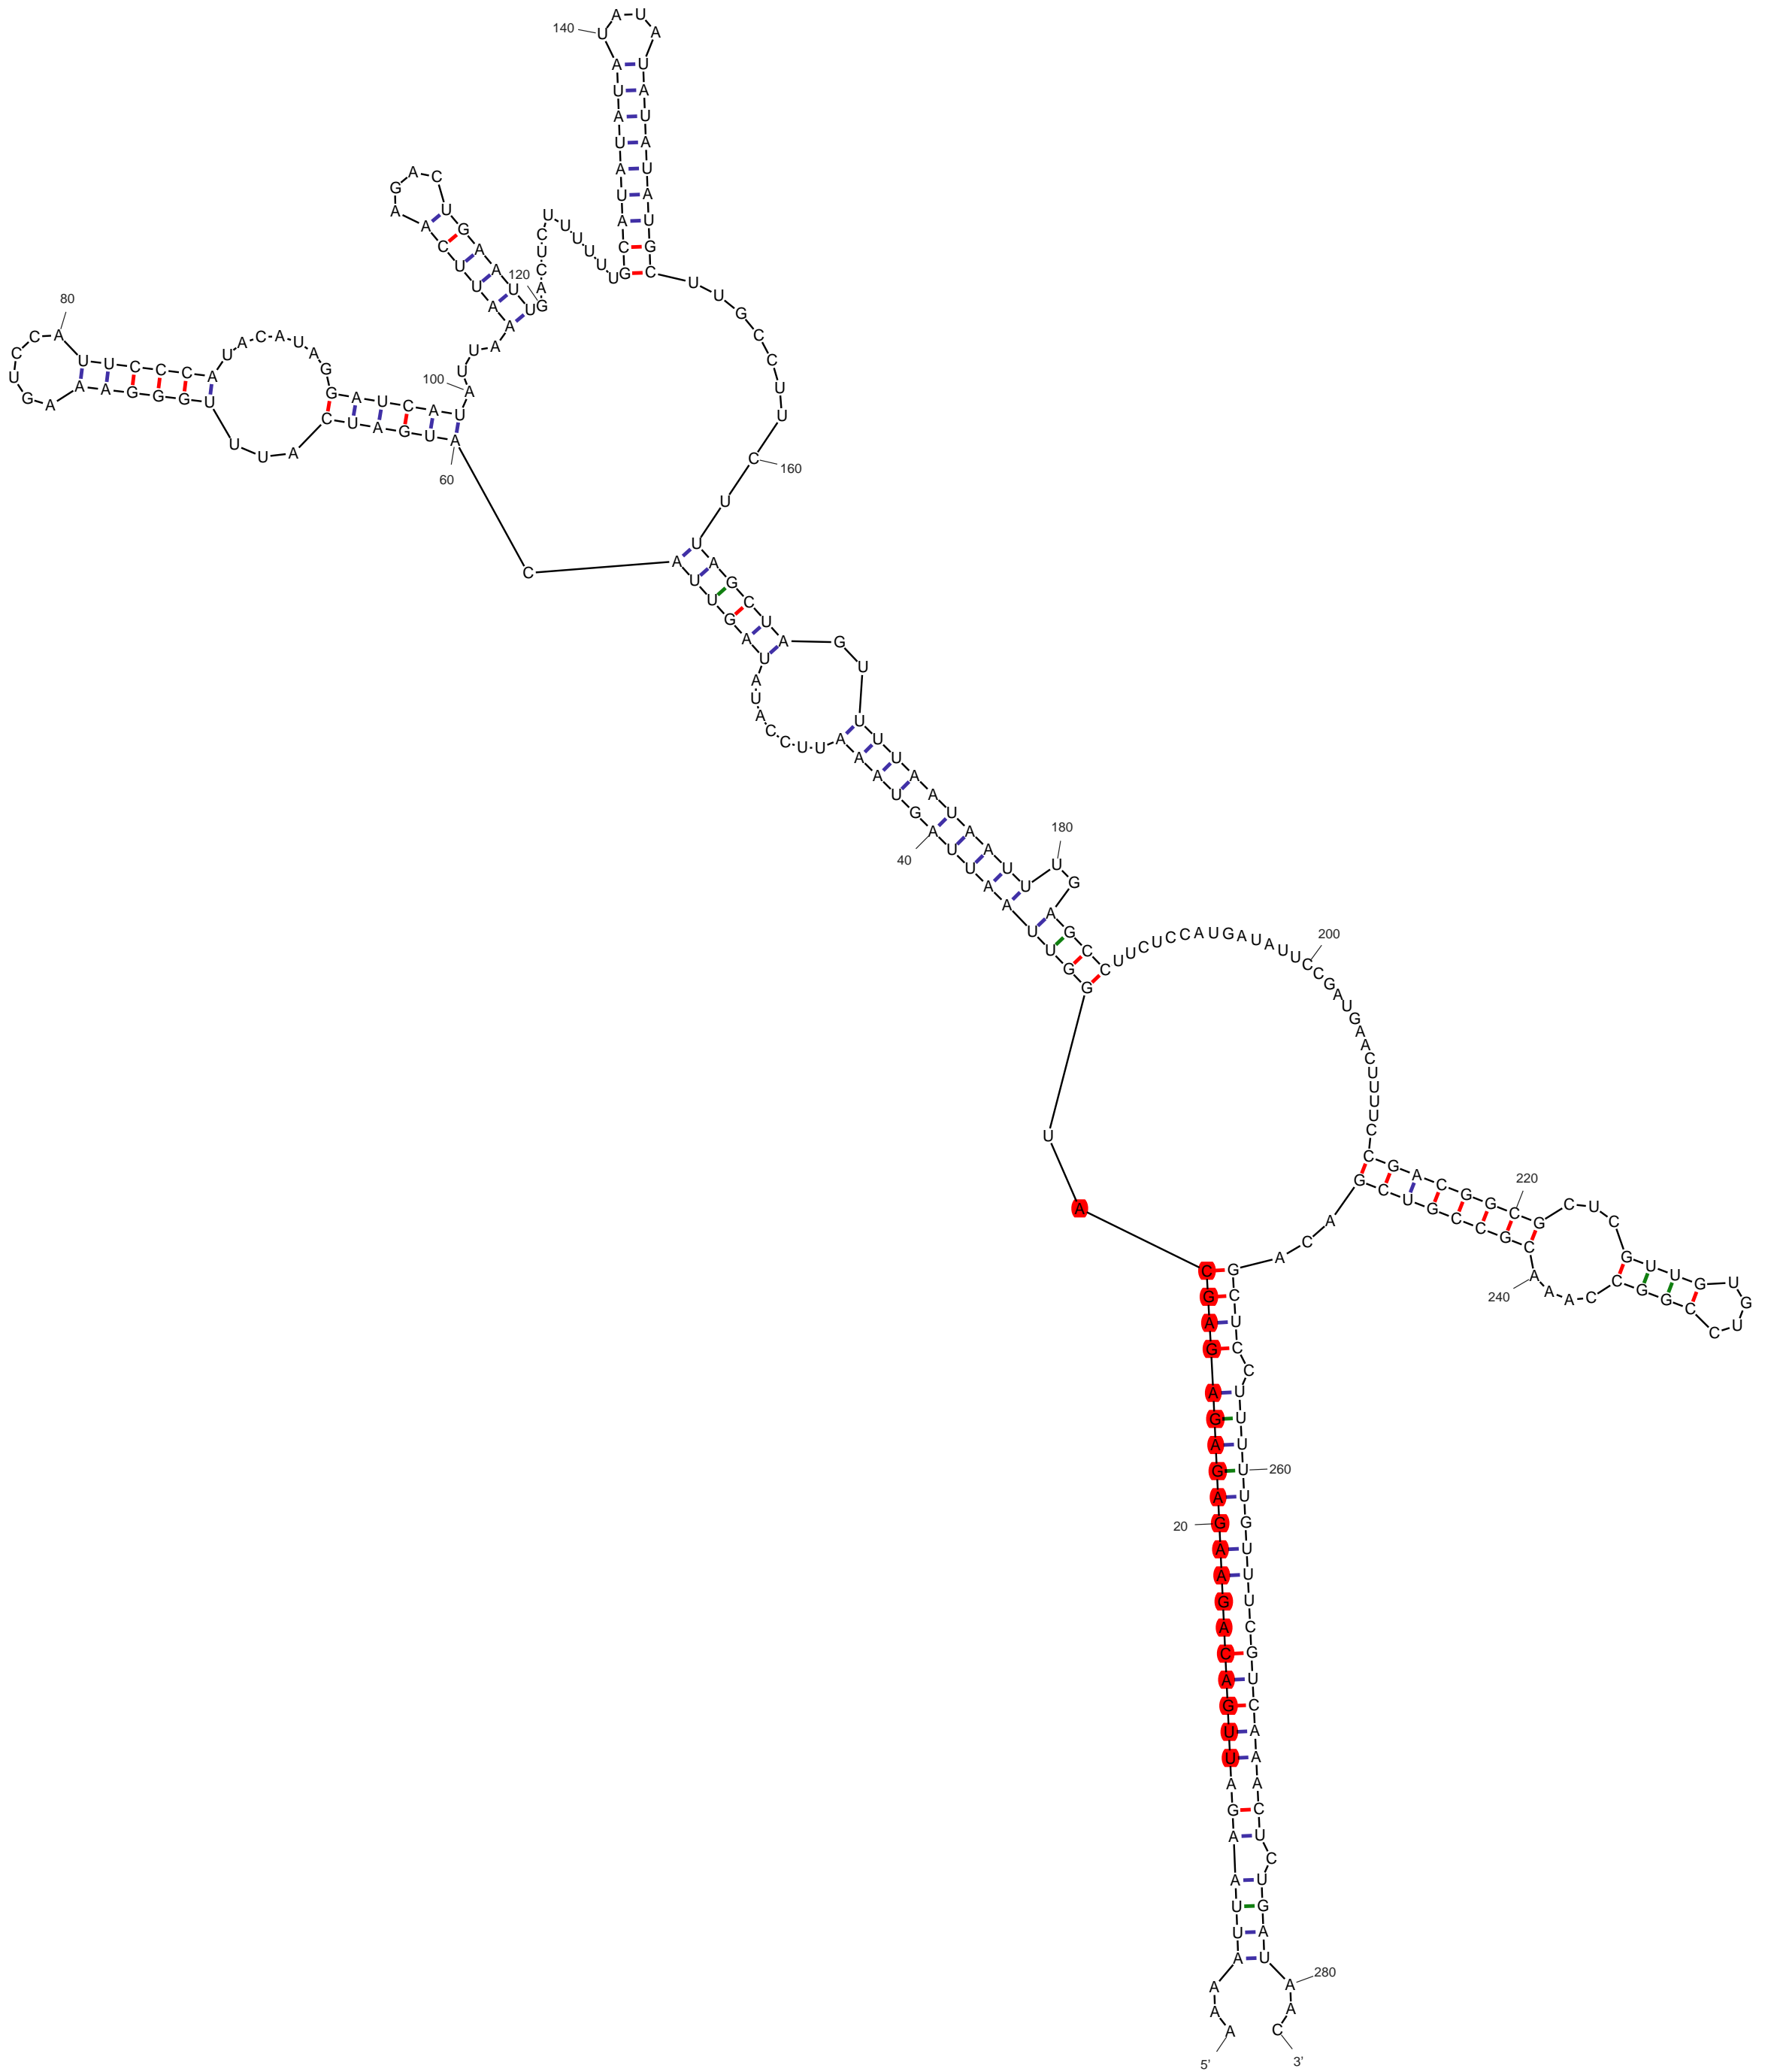

$dG = -59.95$  [Initially  $-67.70$ ] 12-MIR156

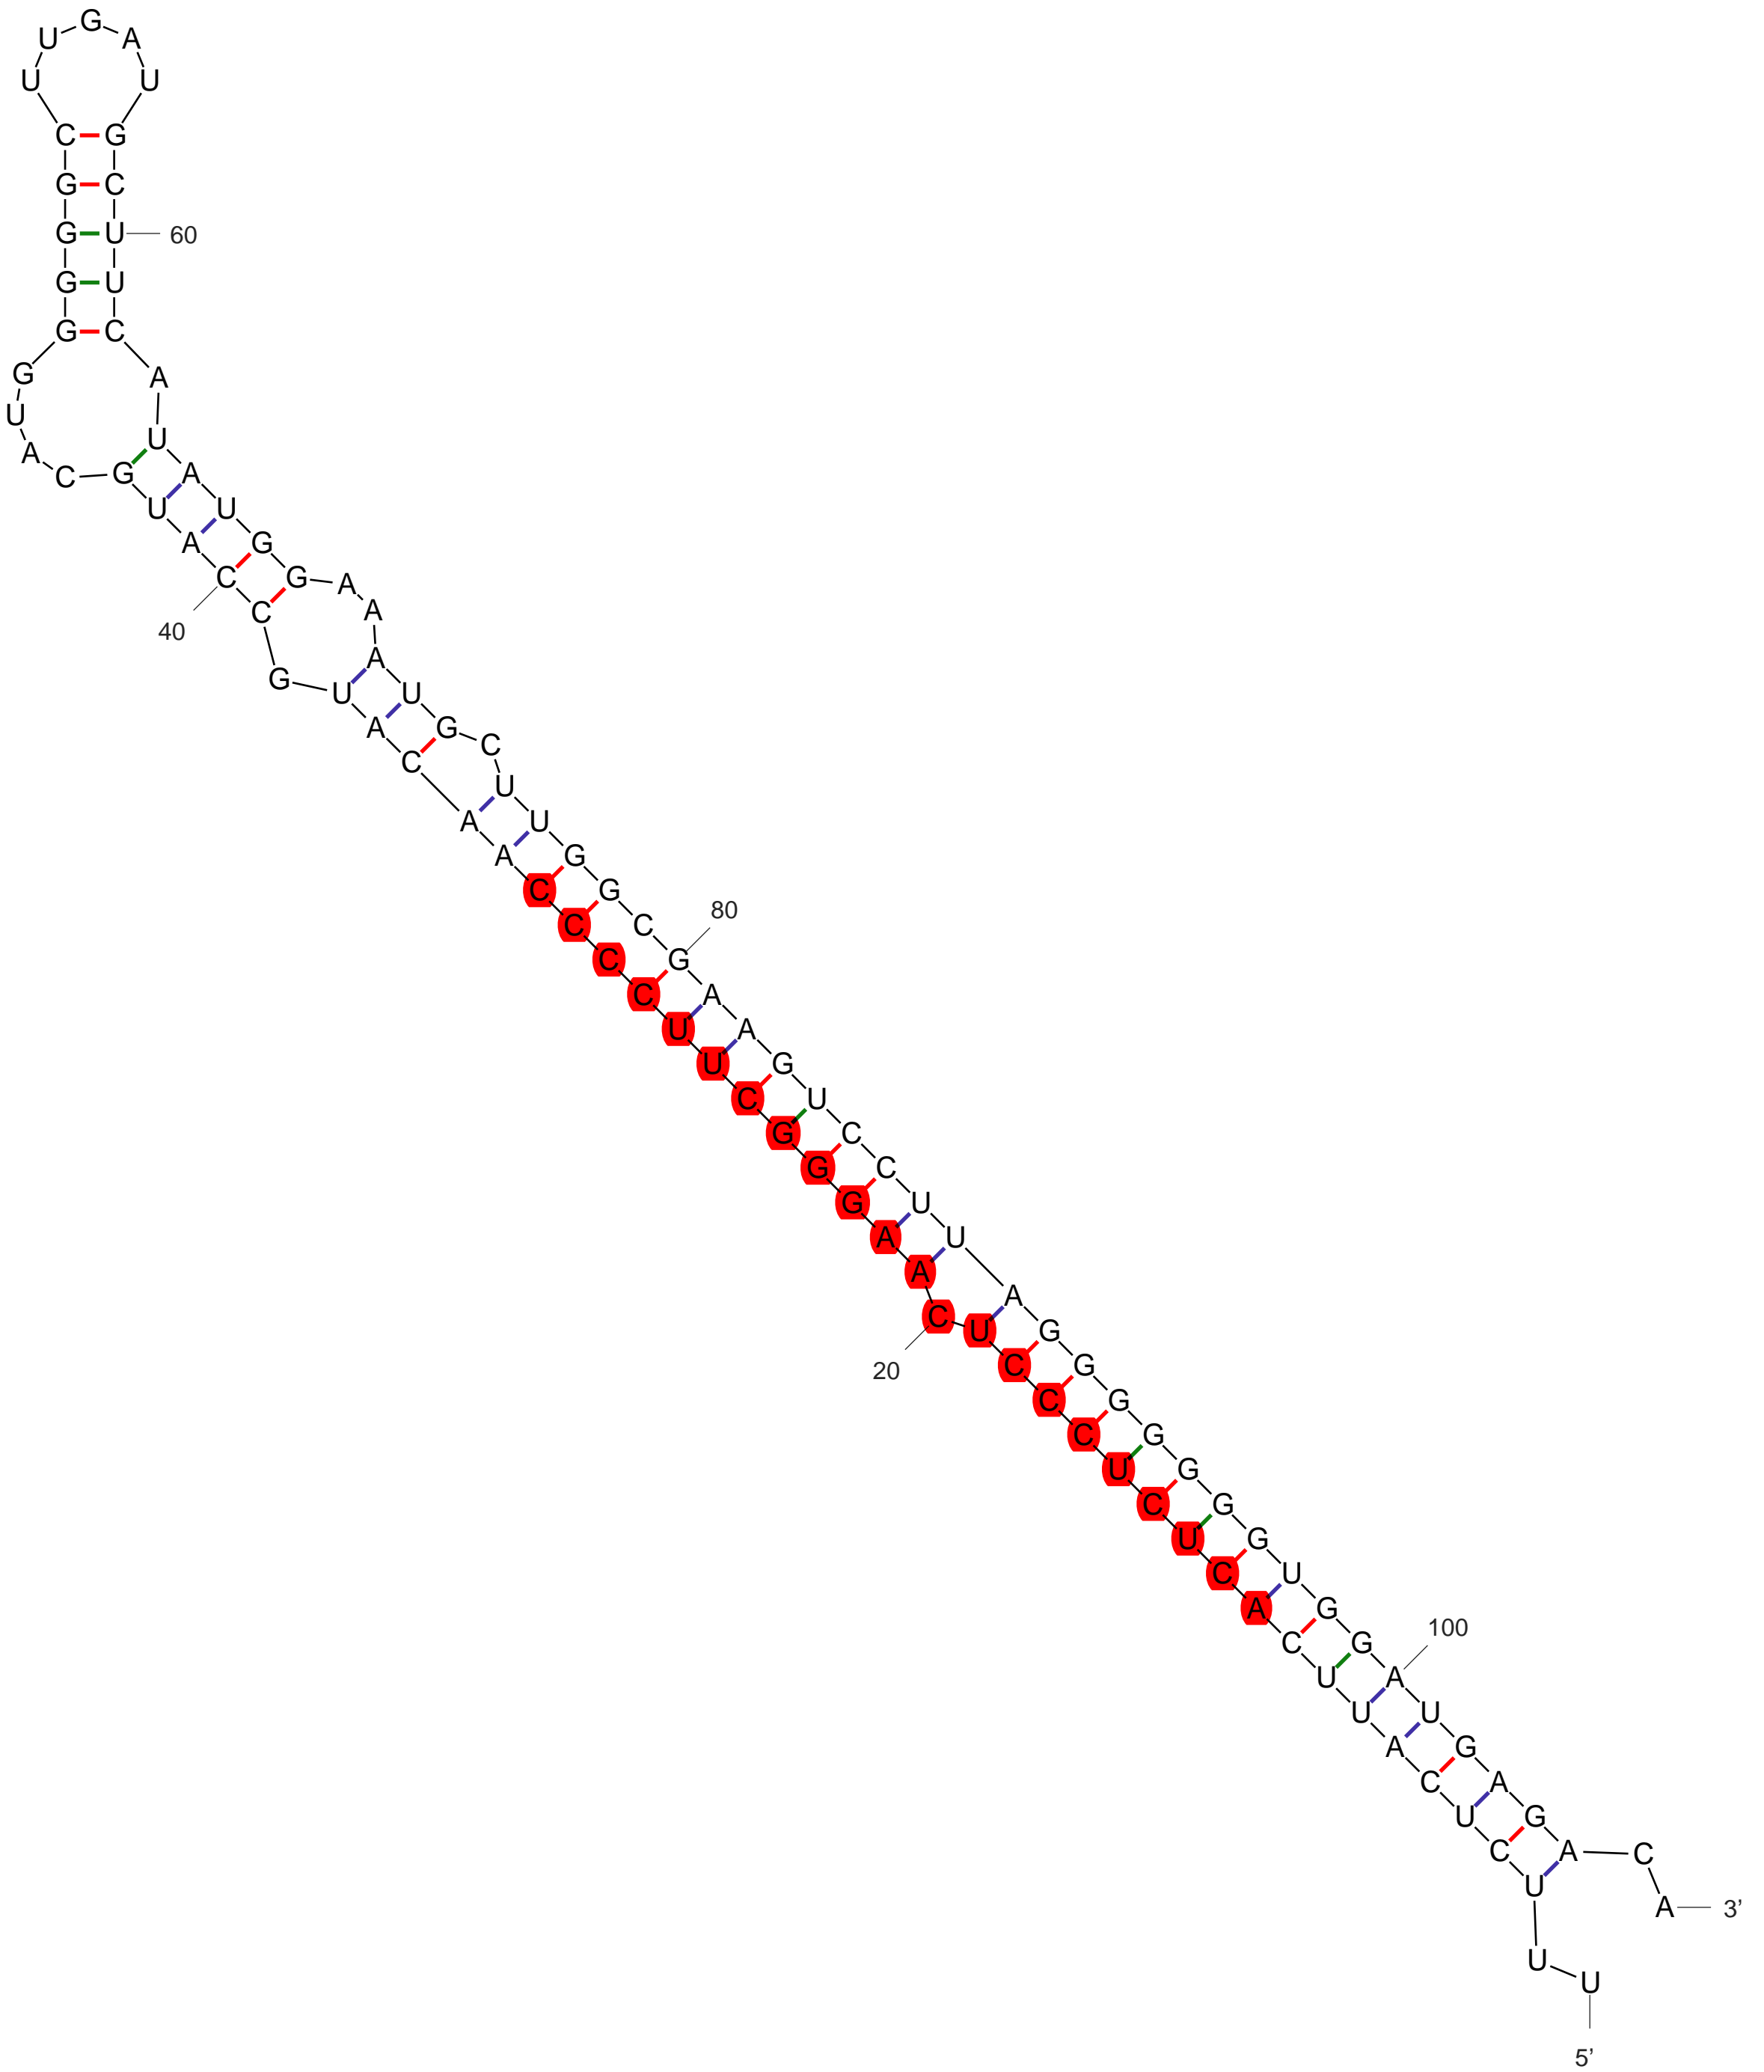

$dG = -58.80$  [Initially -58.80] 130-MIR477

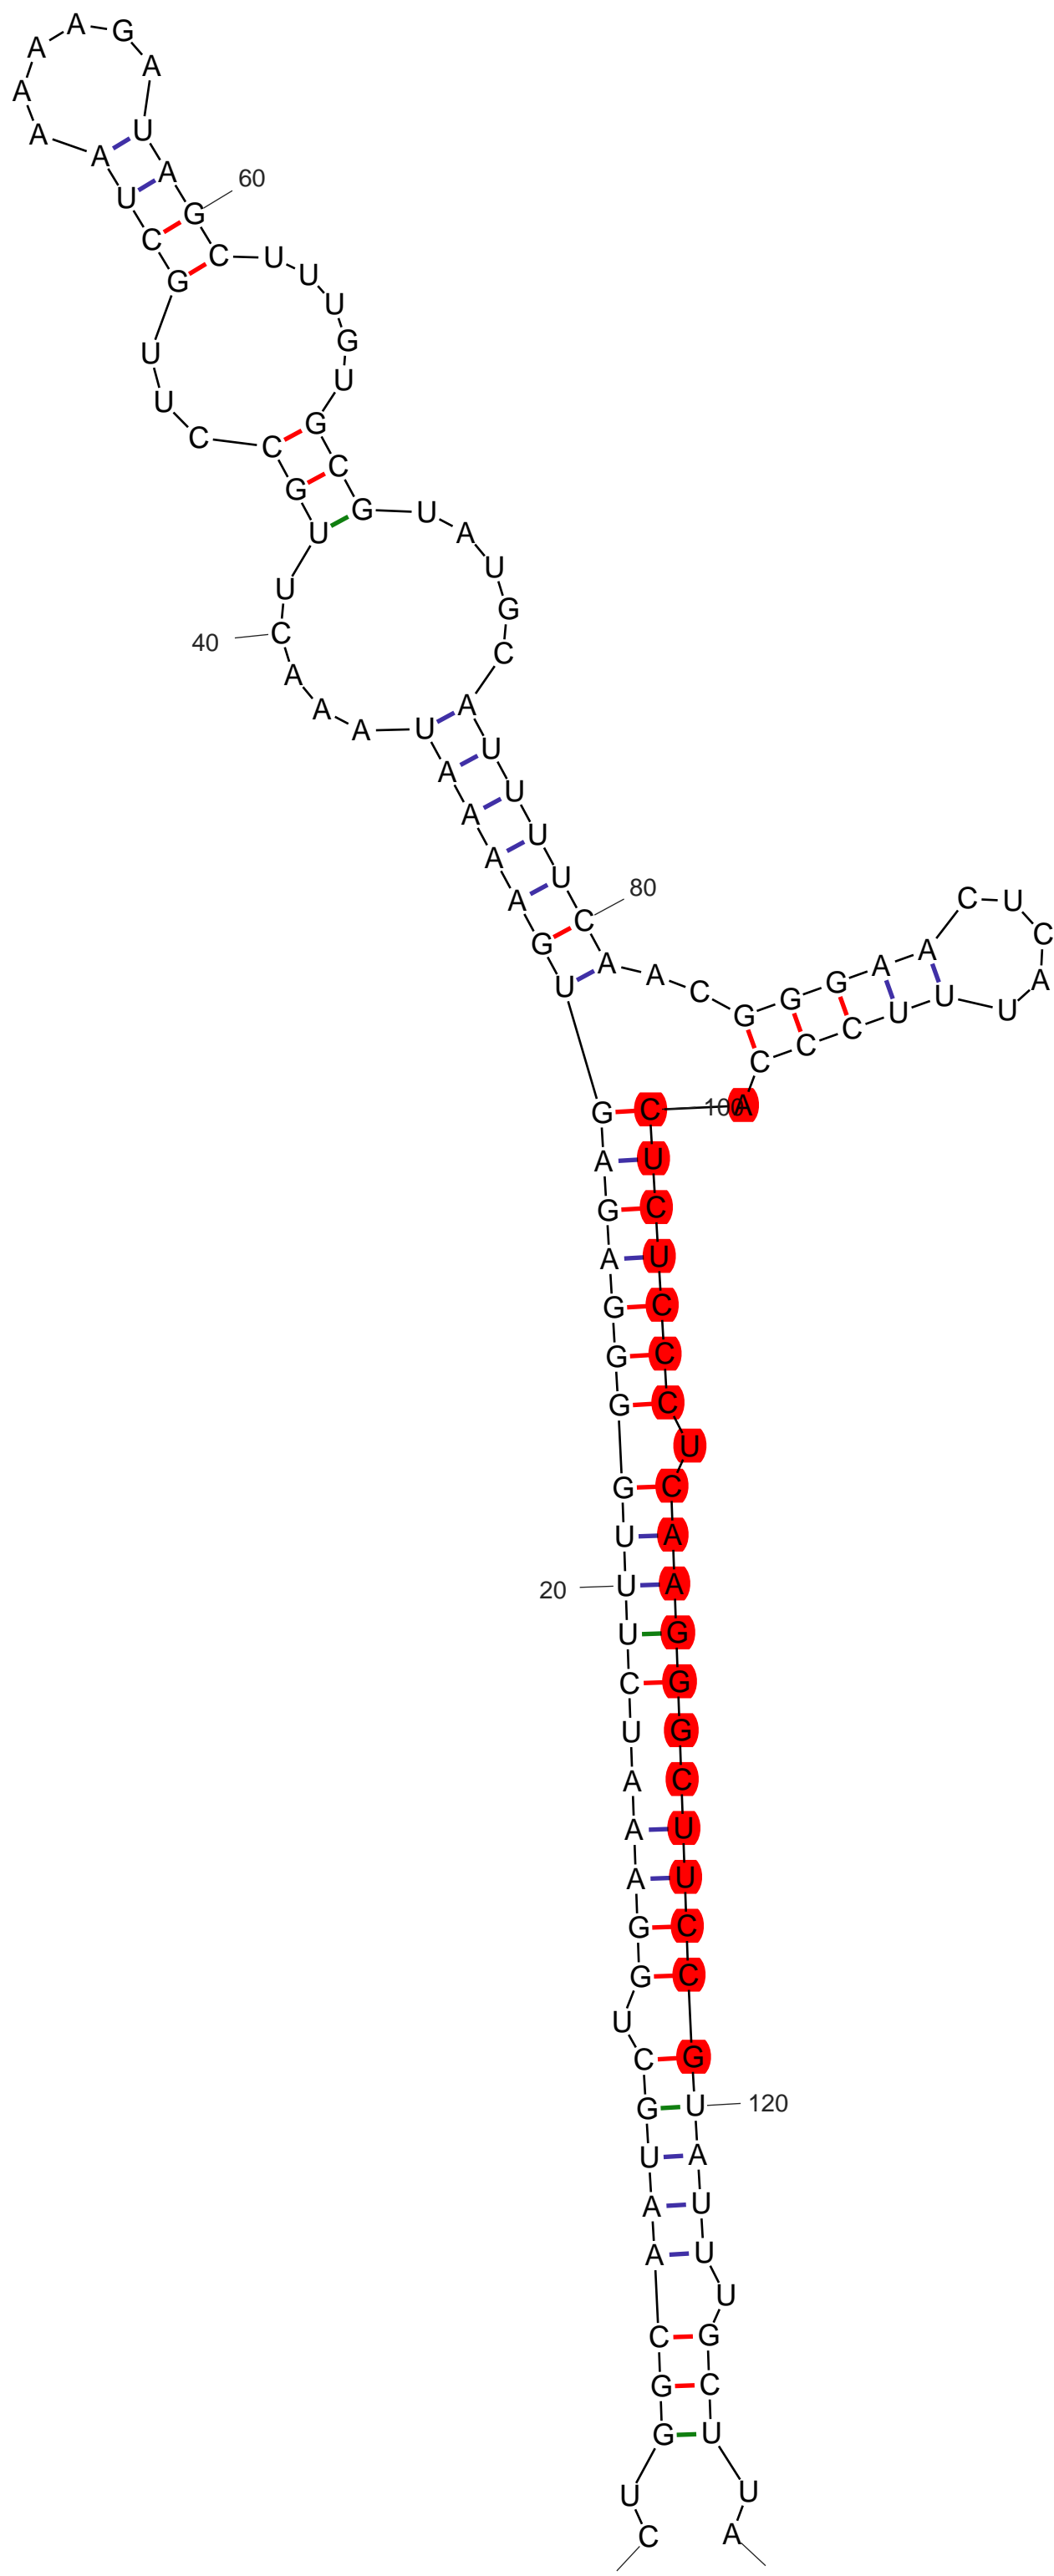

$dG = -44.50$  [Initially  $-47.10$ ] 131-MIR477



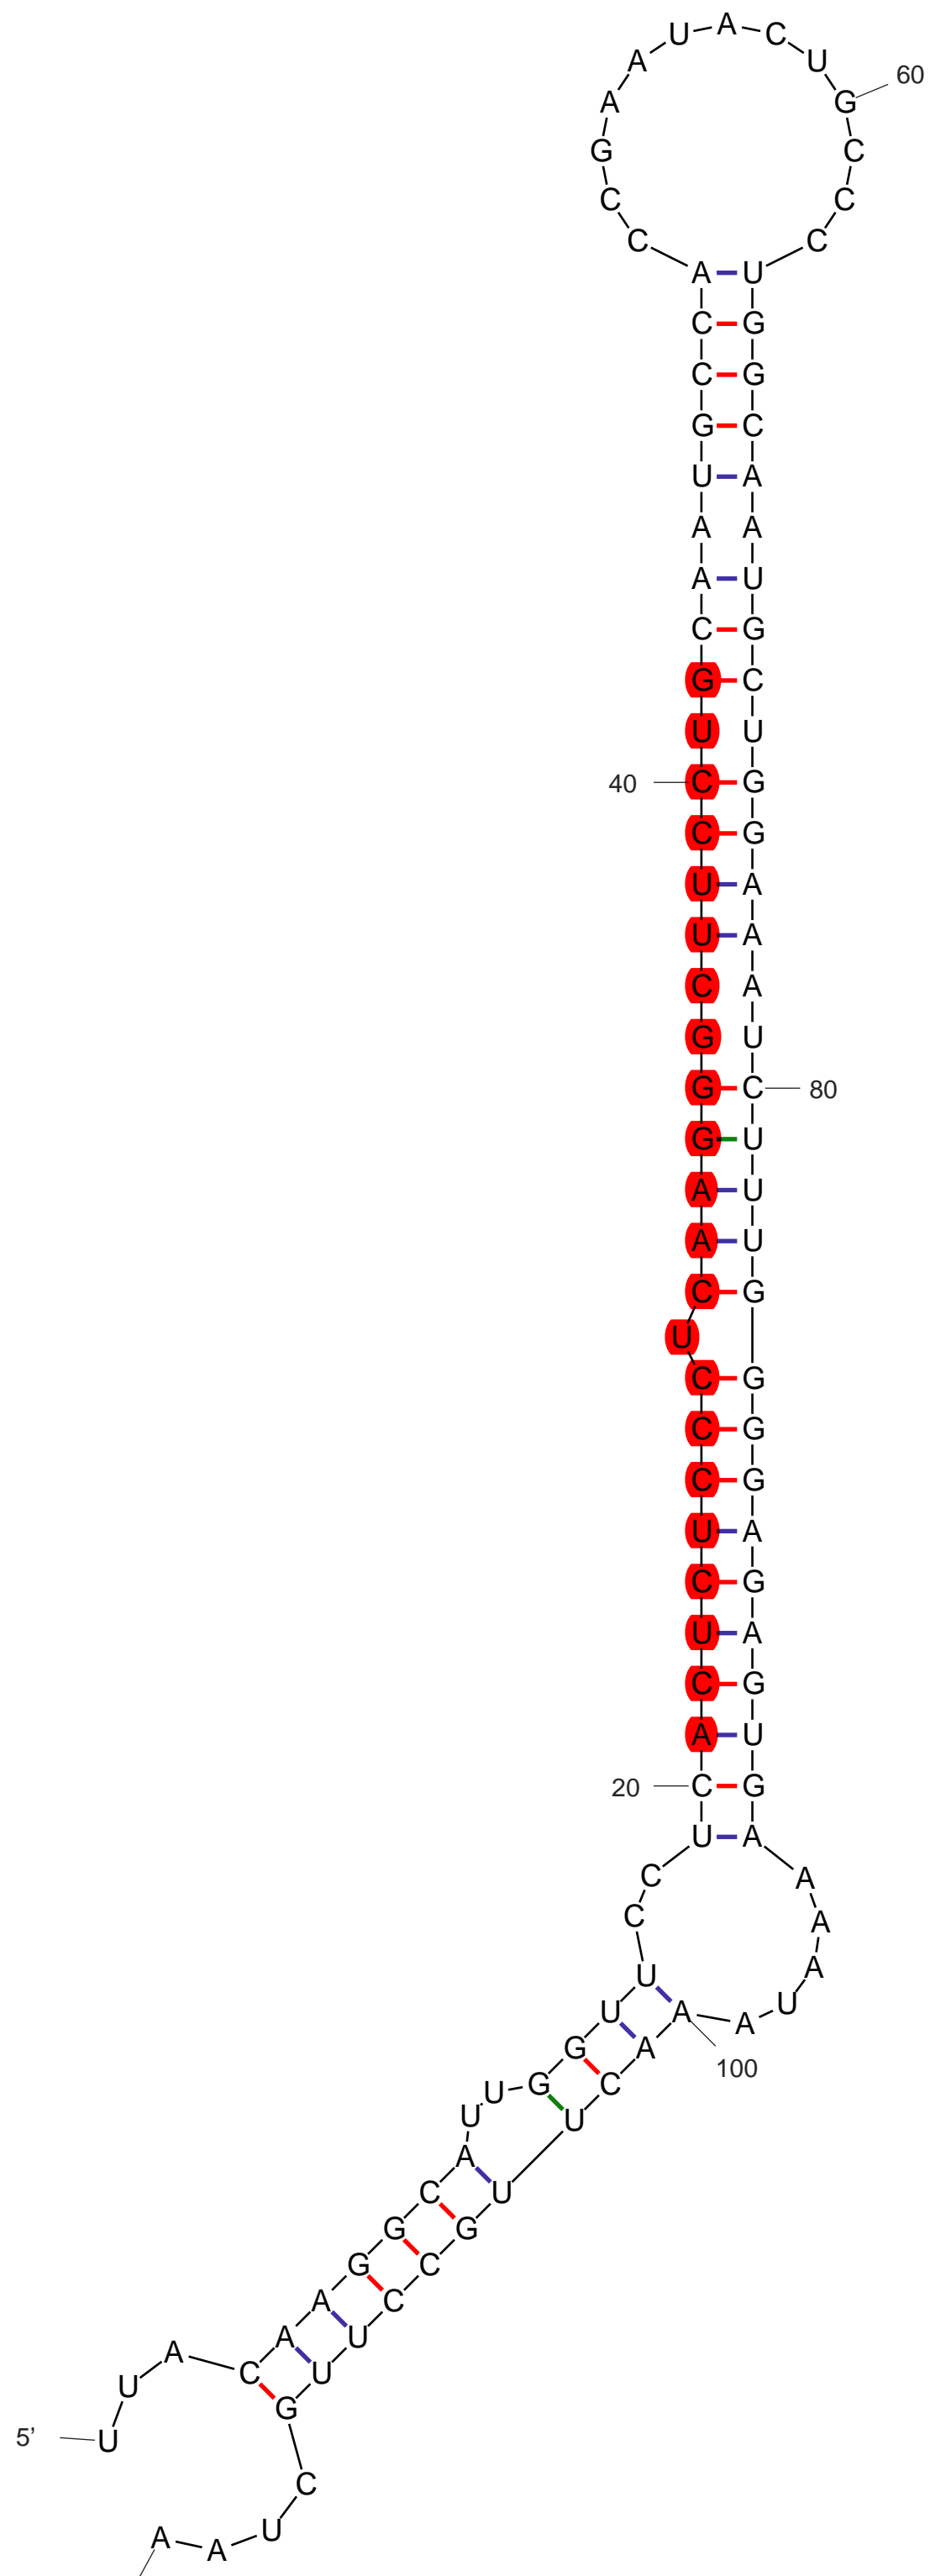

dG = -53.70 [Initially -53.70] 132-MIR477

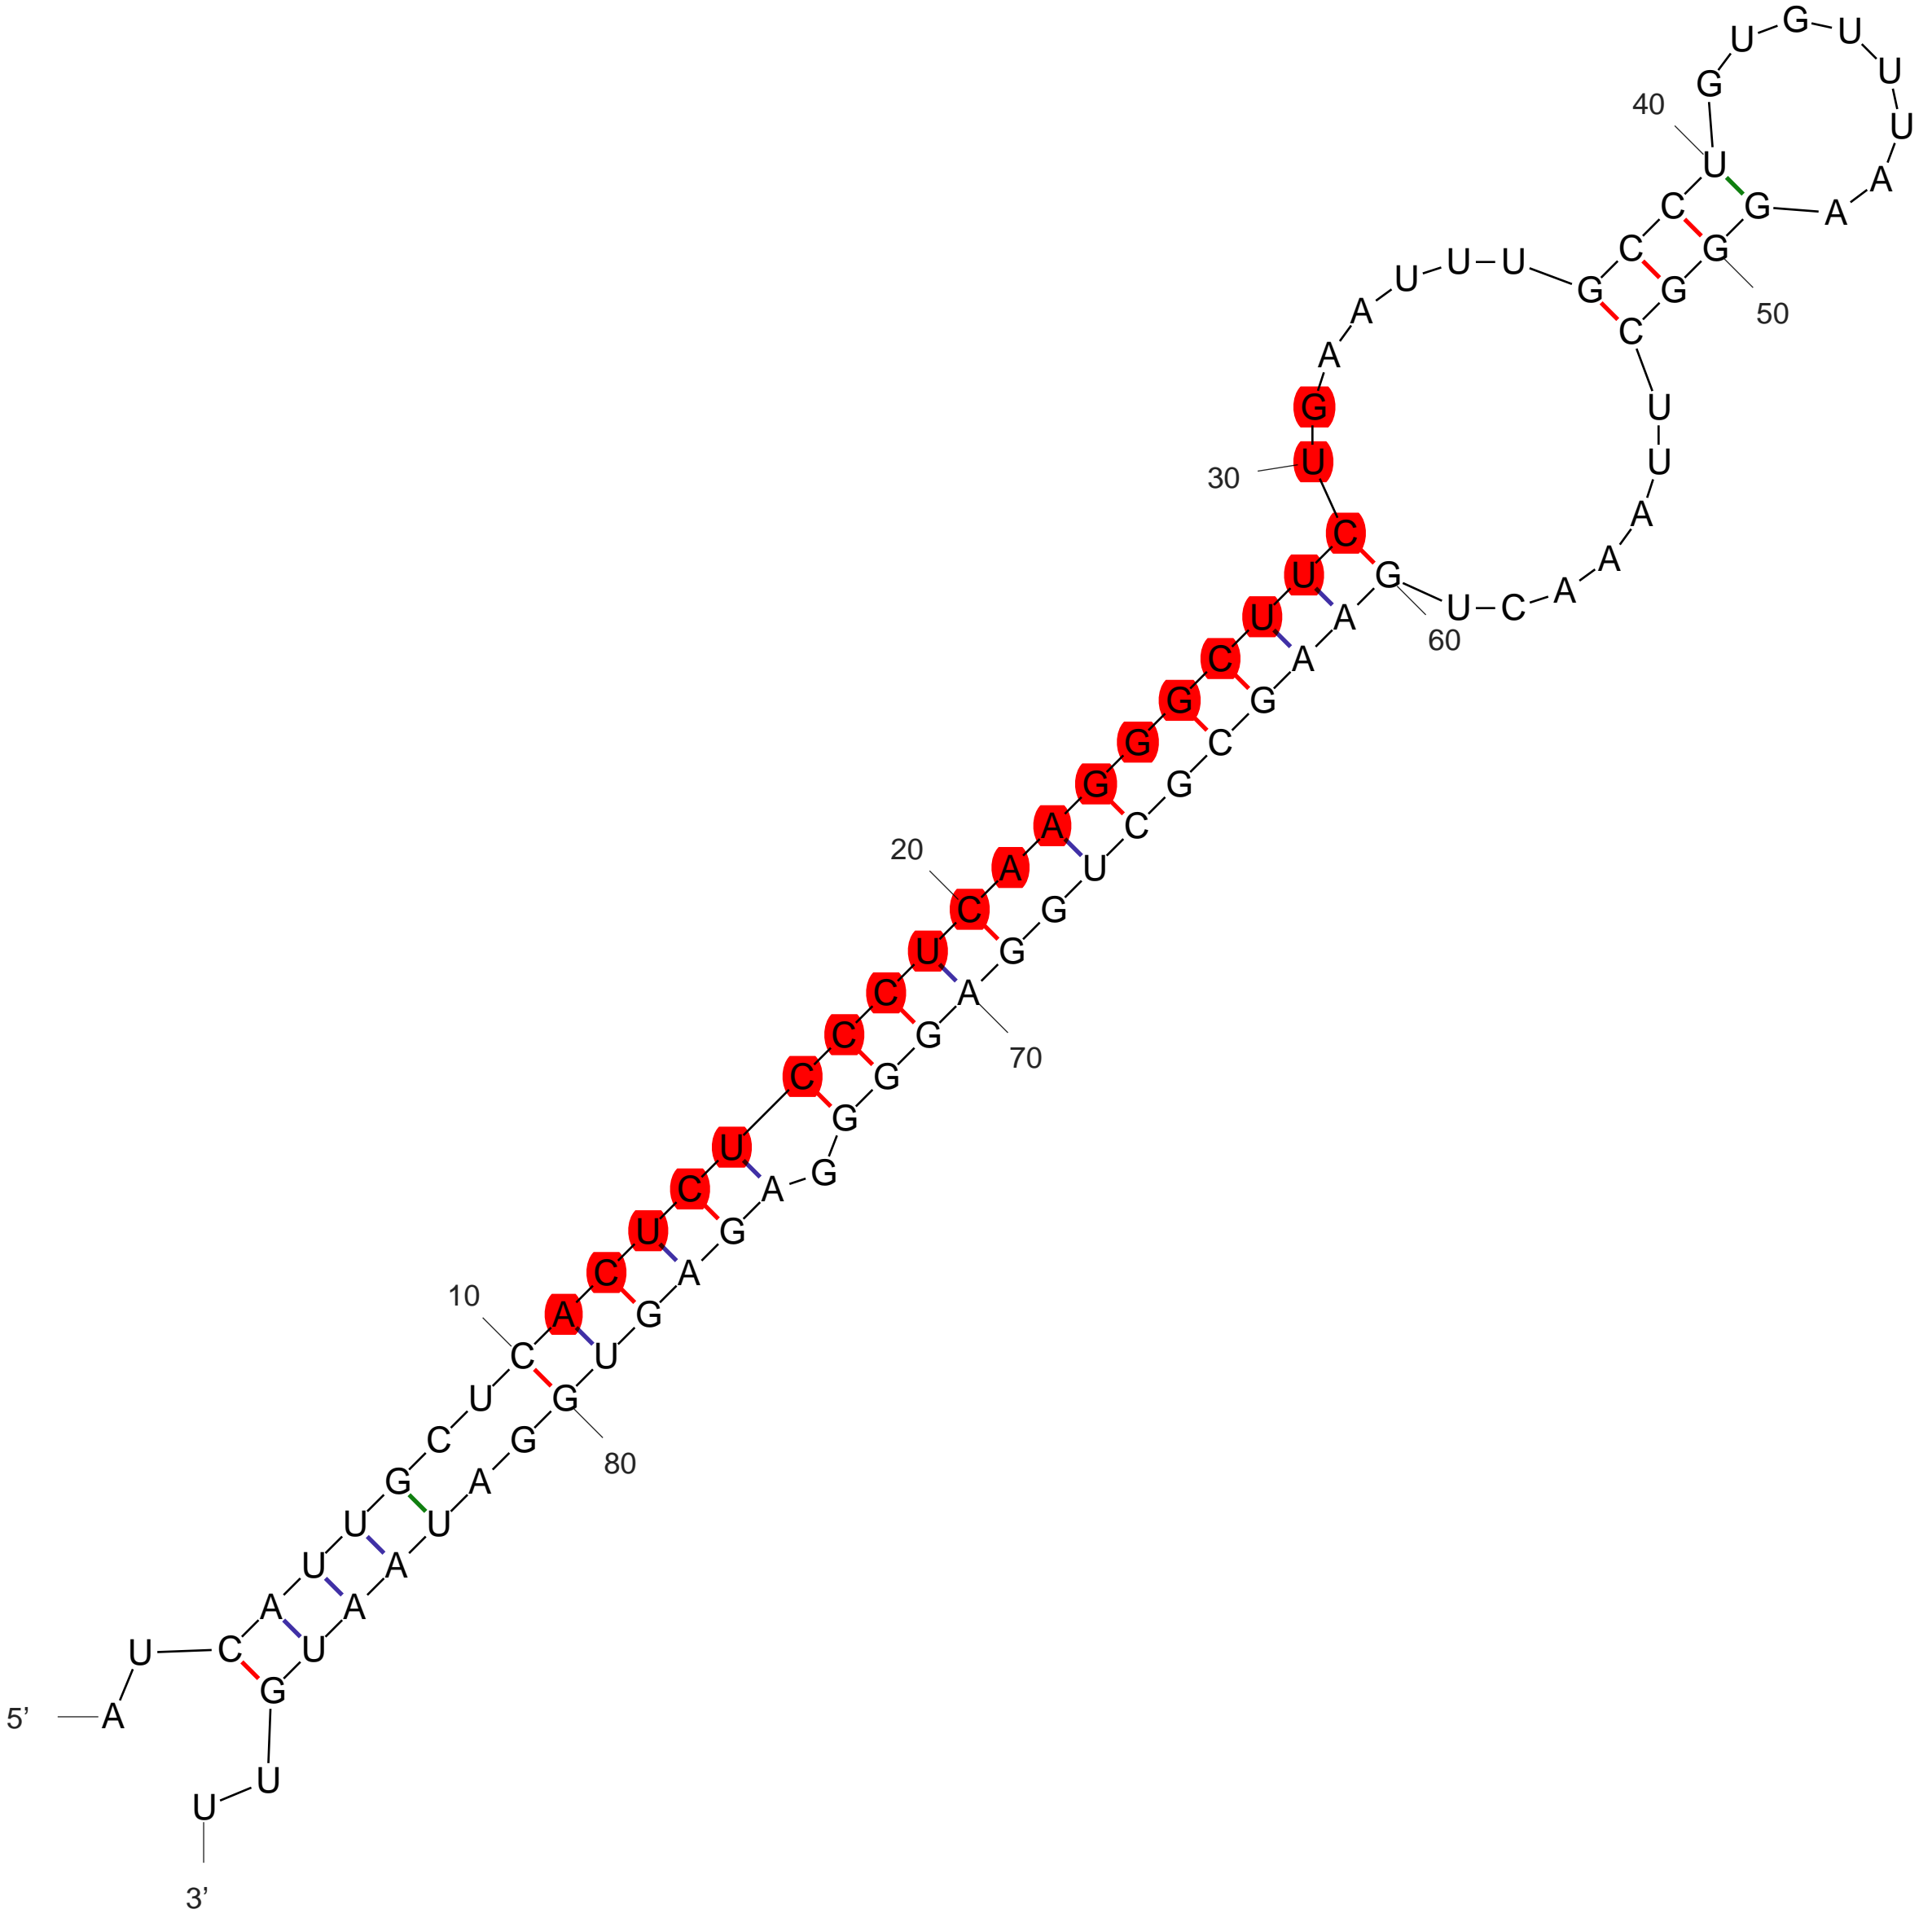

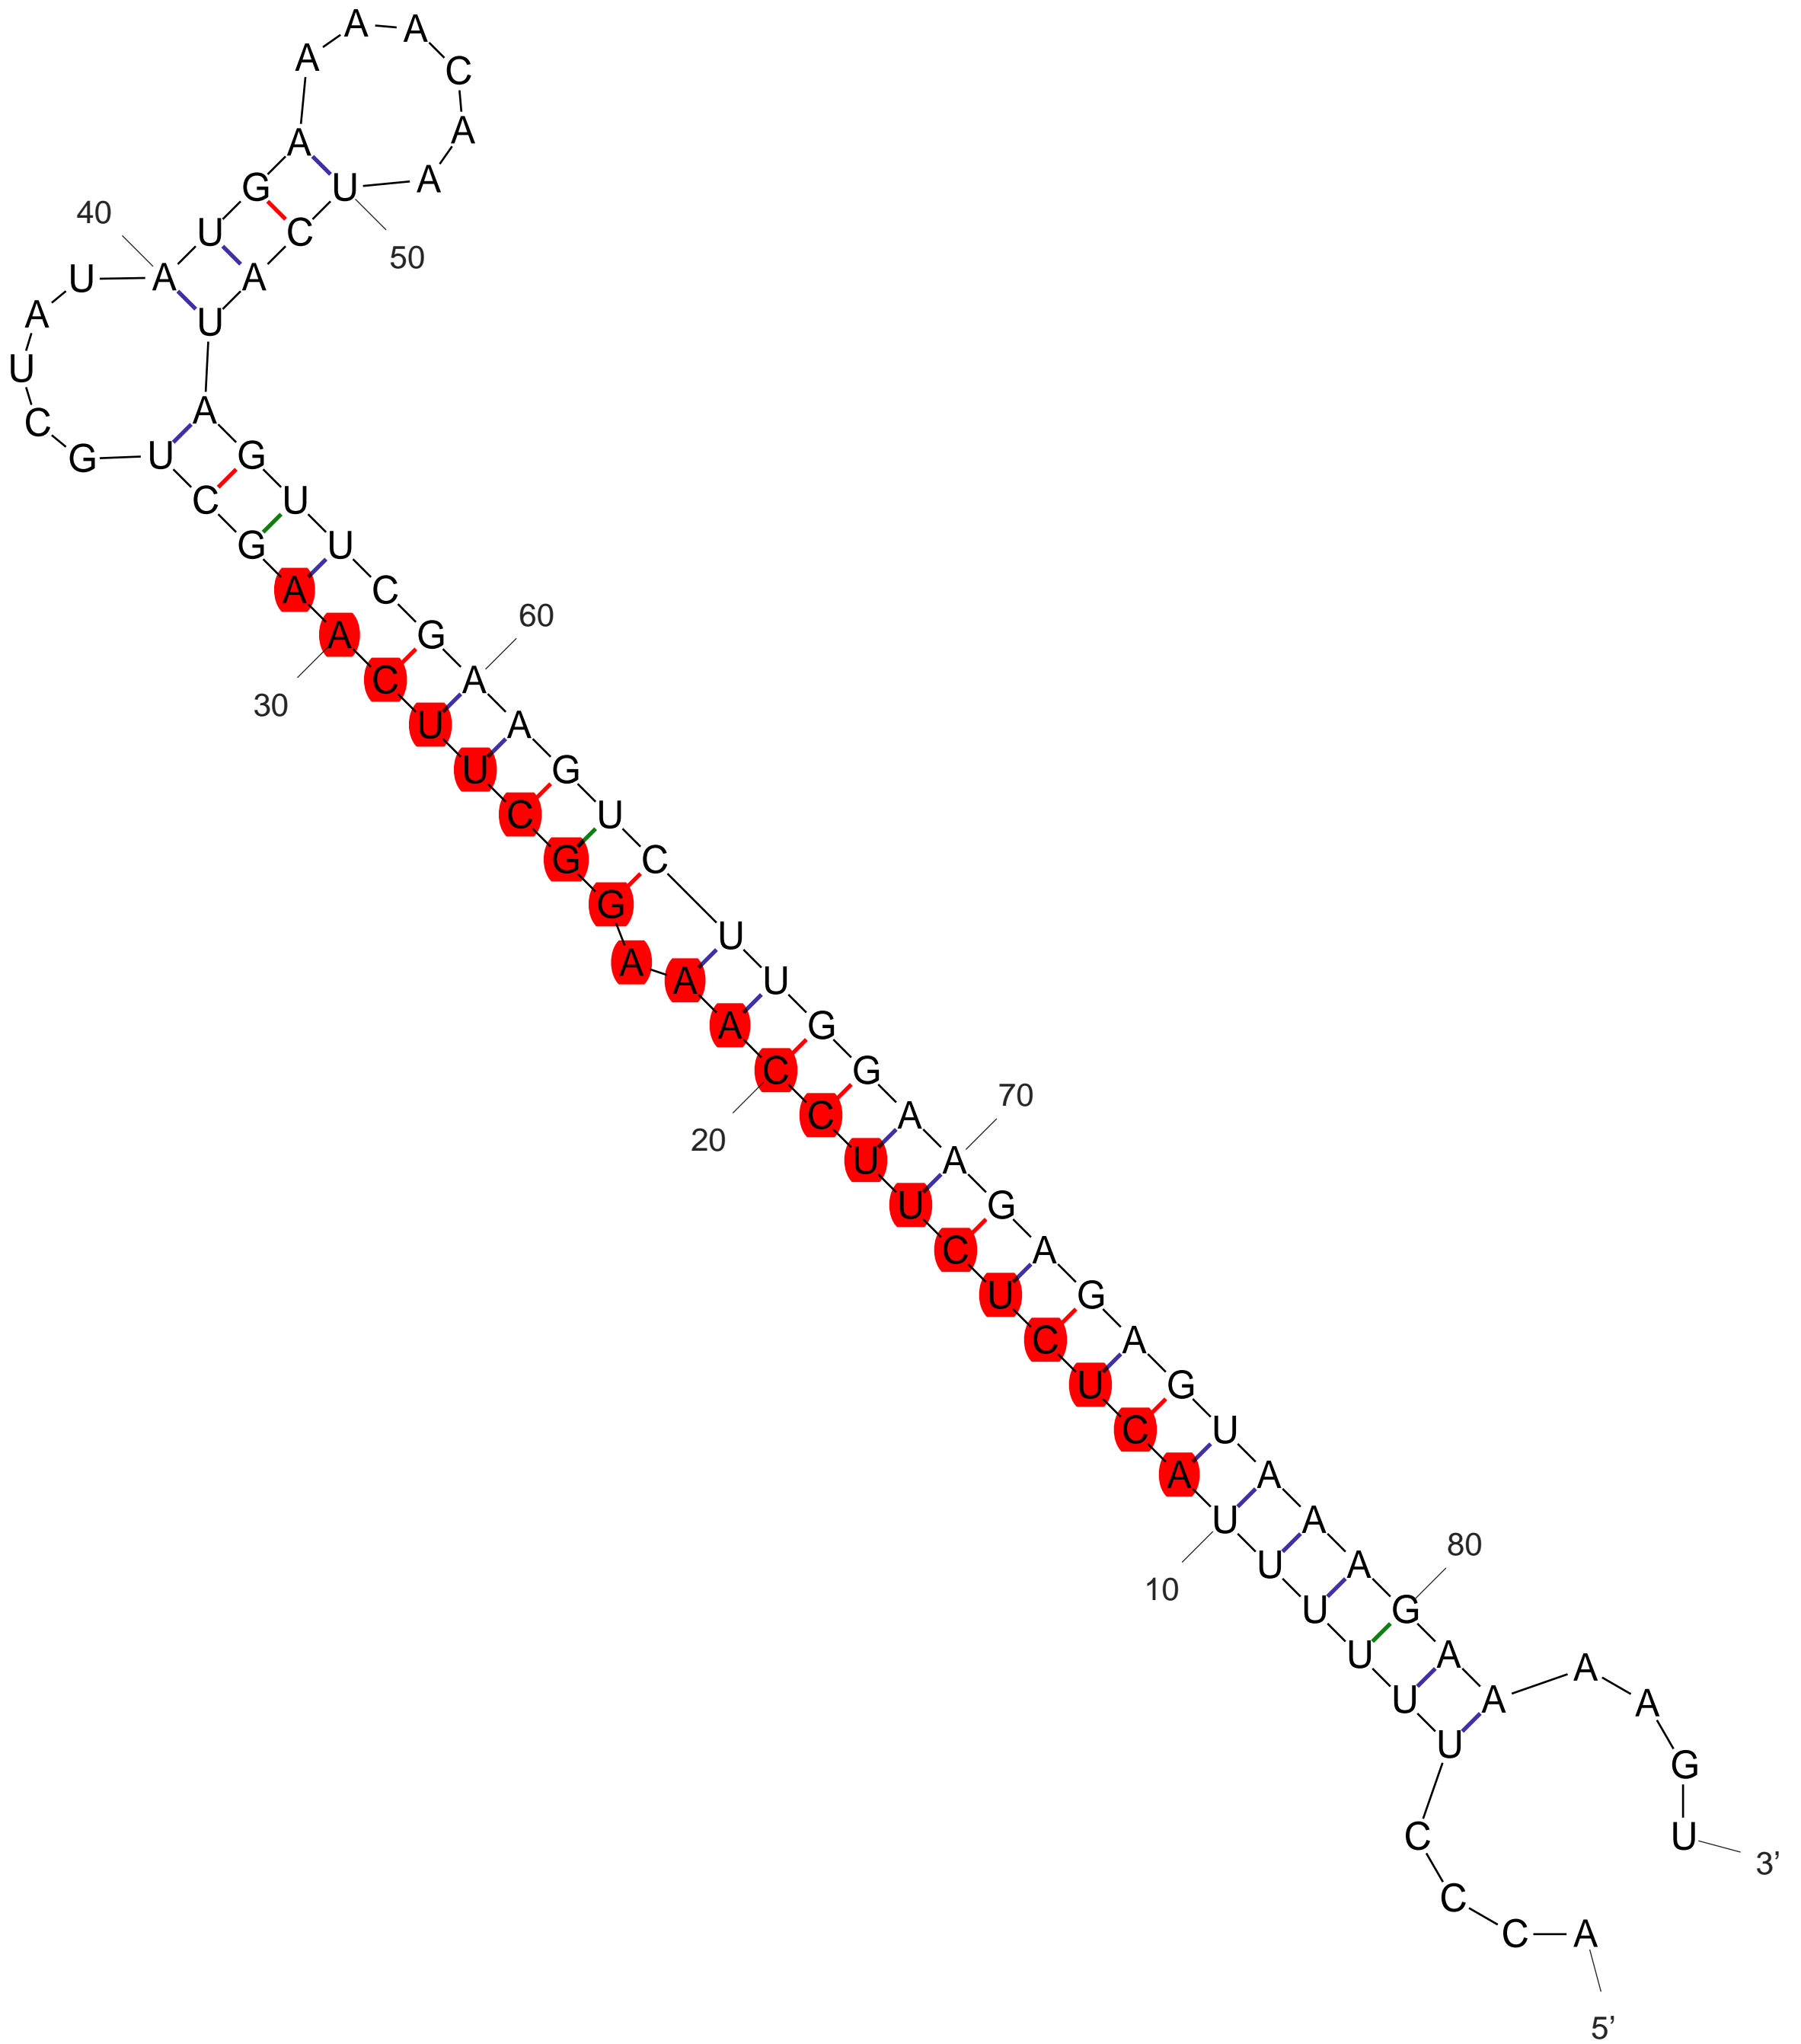

*dG = -36.50 [Initially -36.50] 134-MIR477*

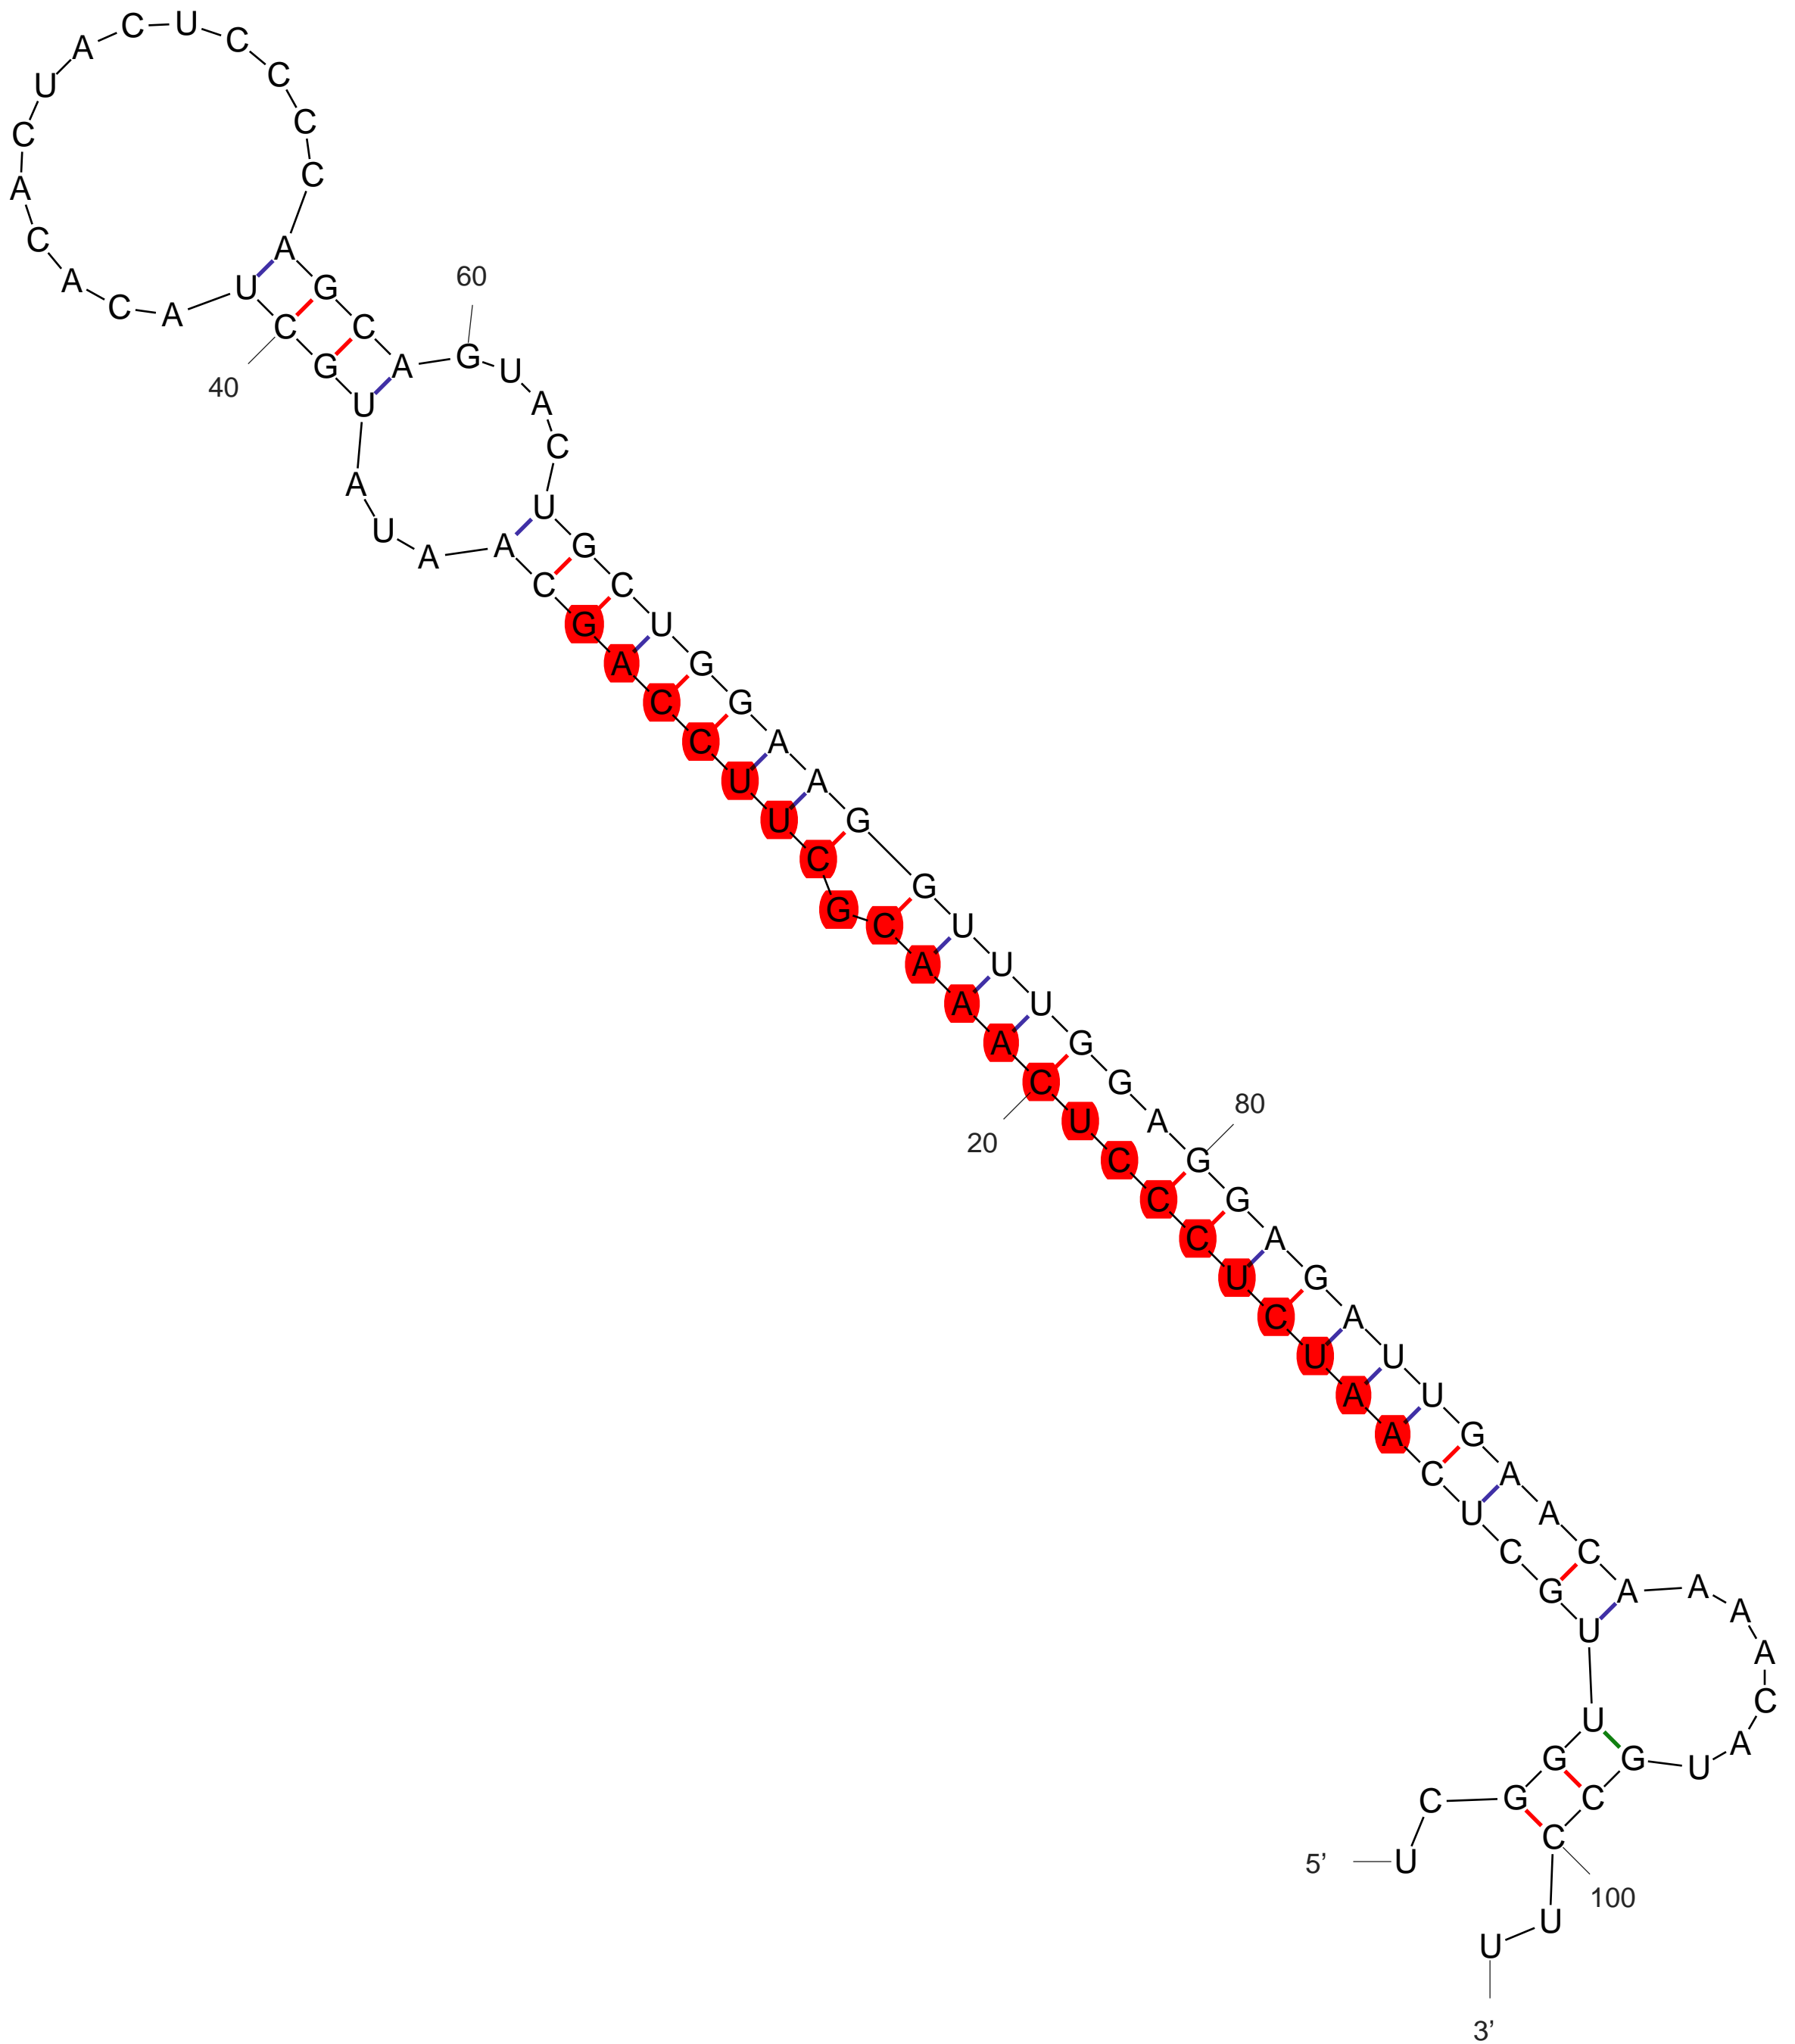

$dG = -43.10$  [Initially -43.10] 135-MIR477

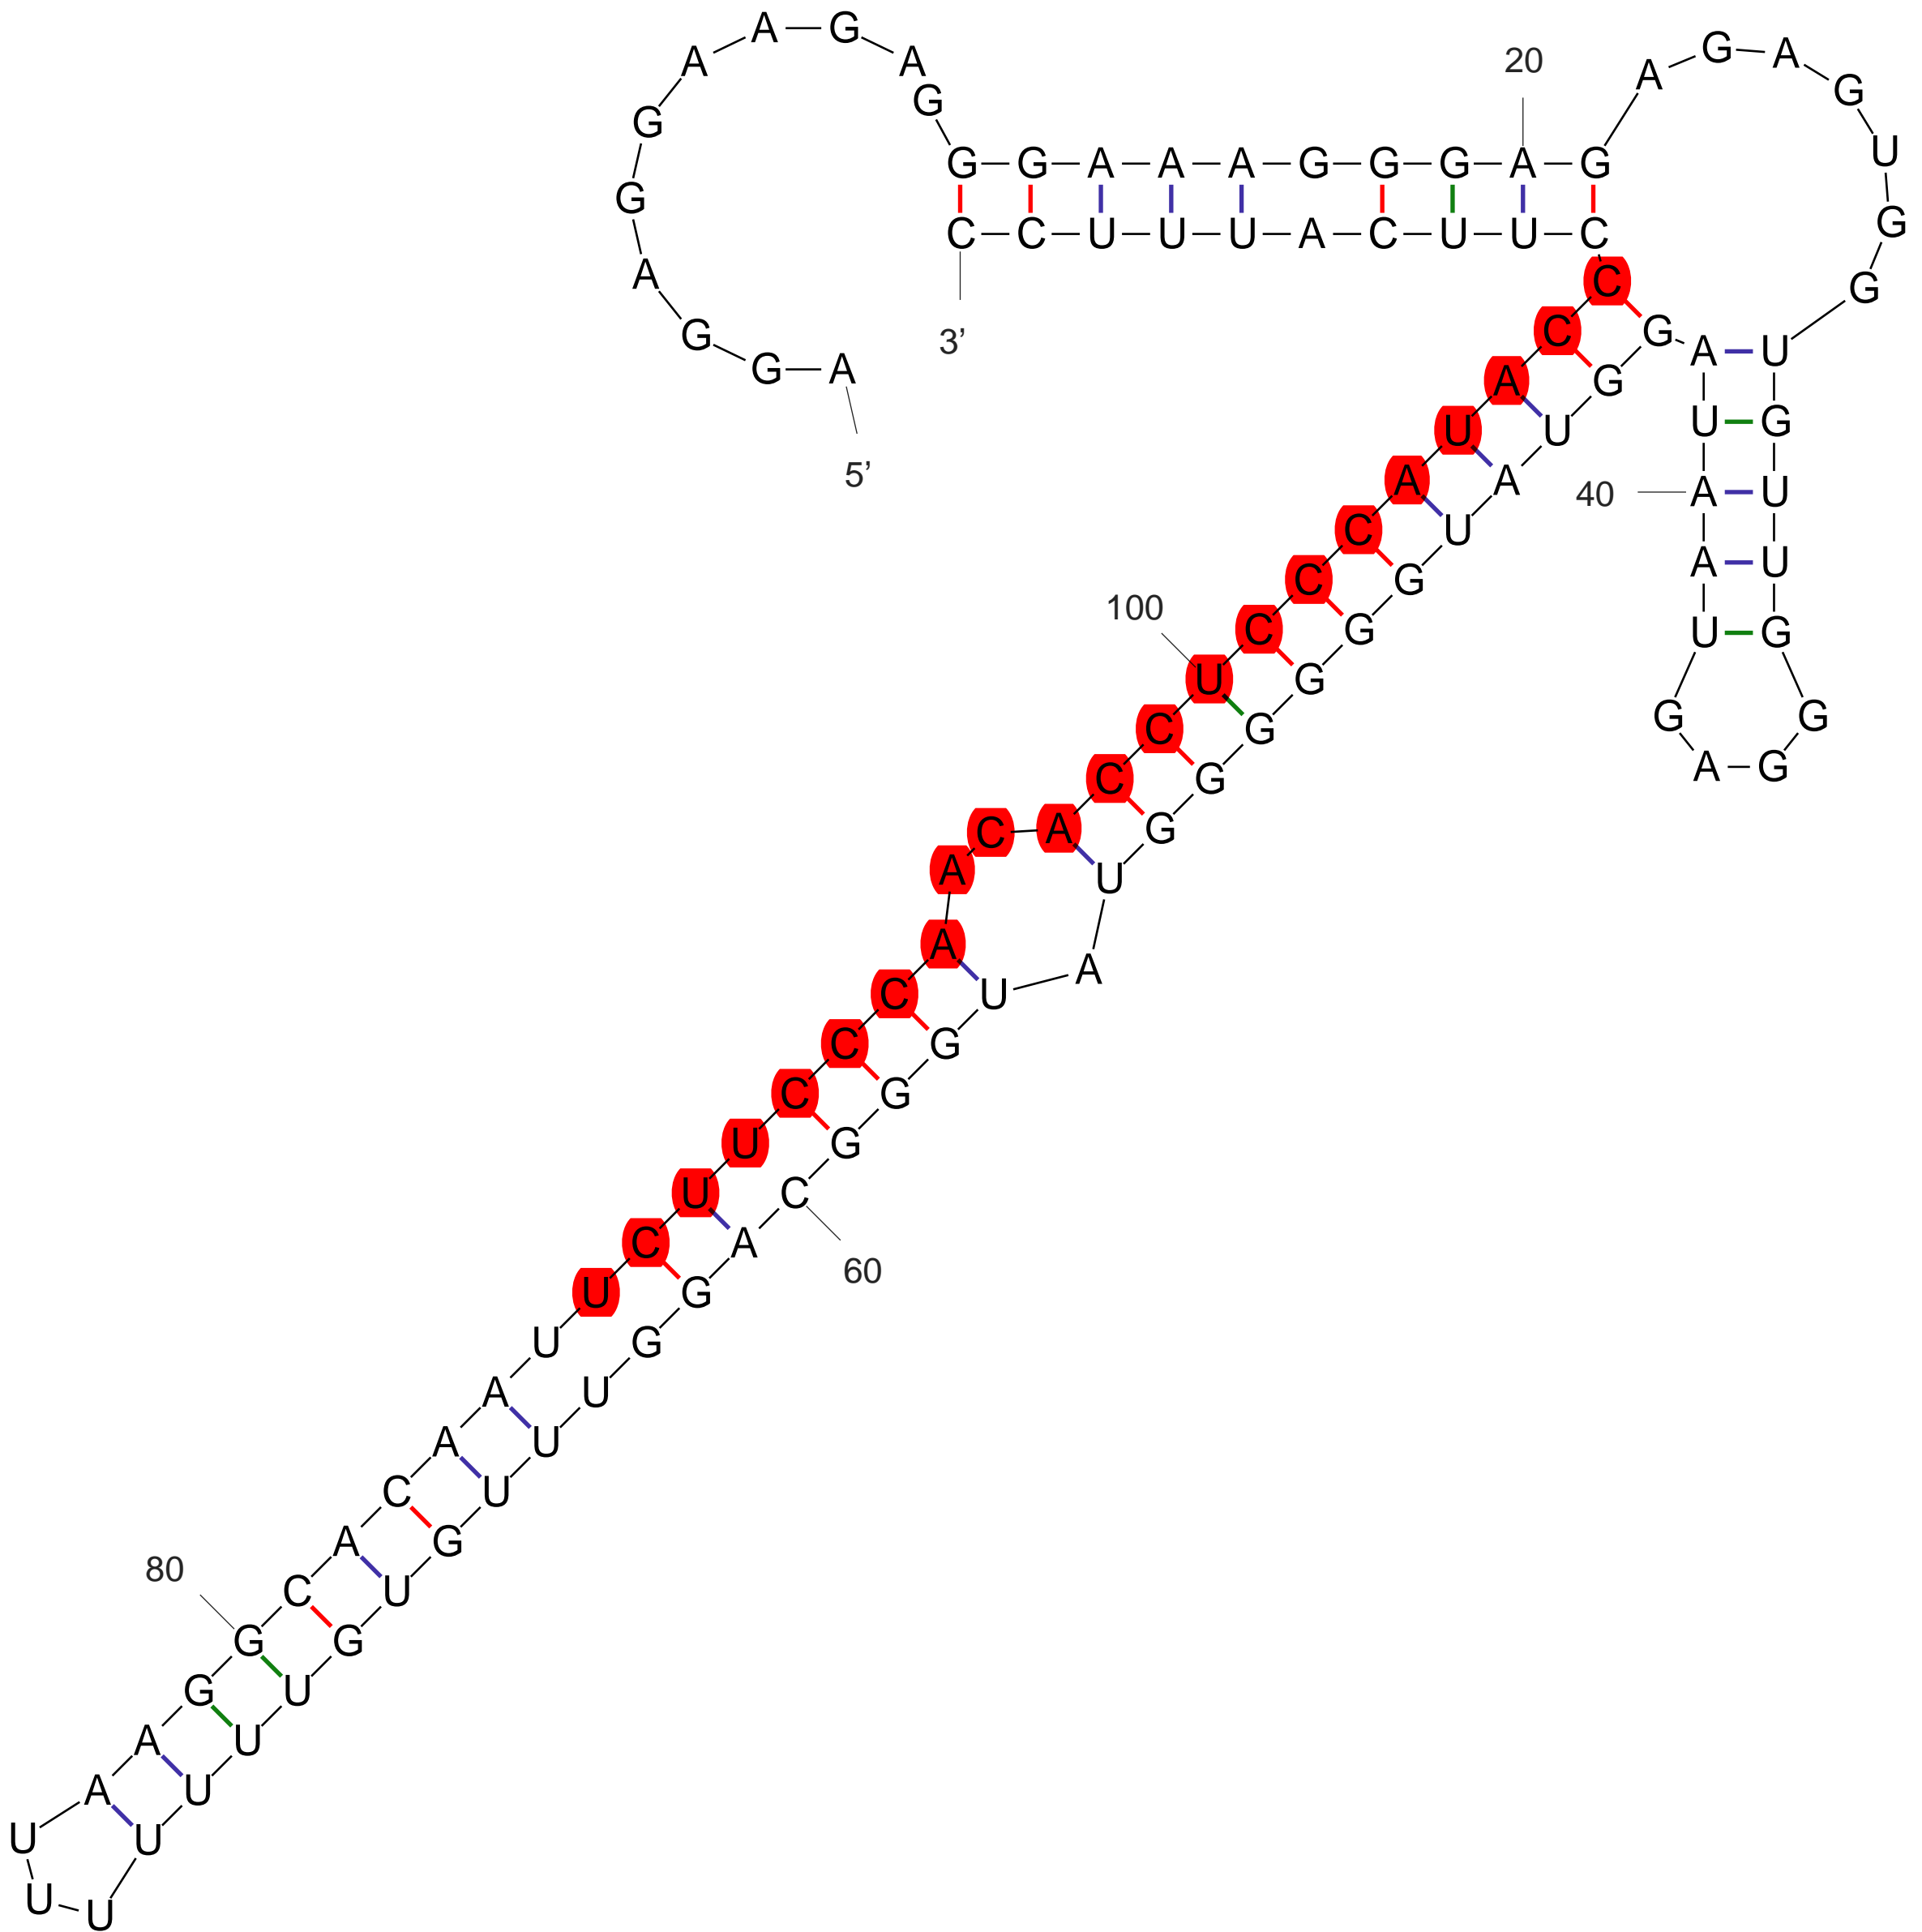

$dG = -42.93$  [Initially -43.70] 136-MIR482

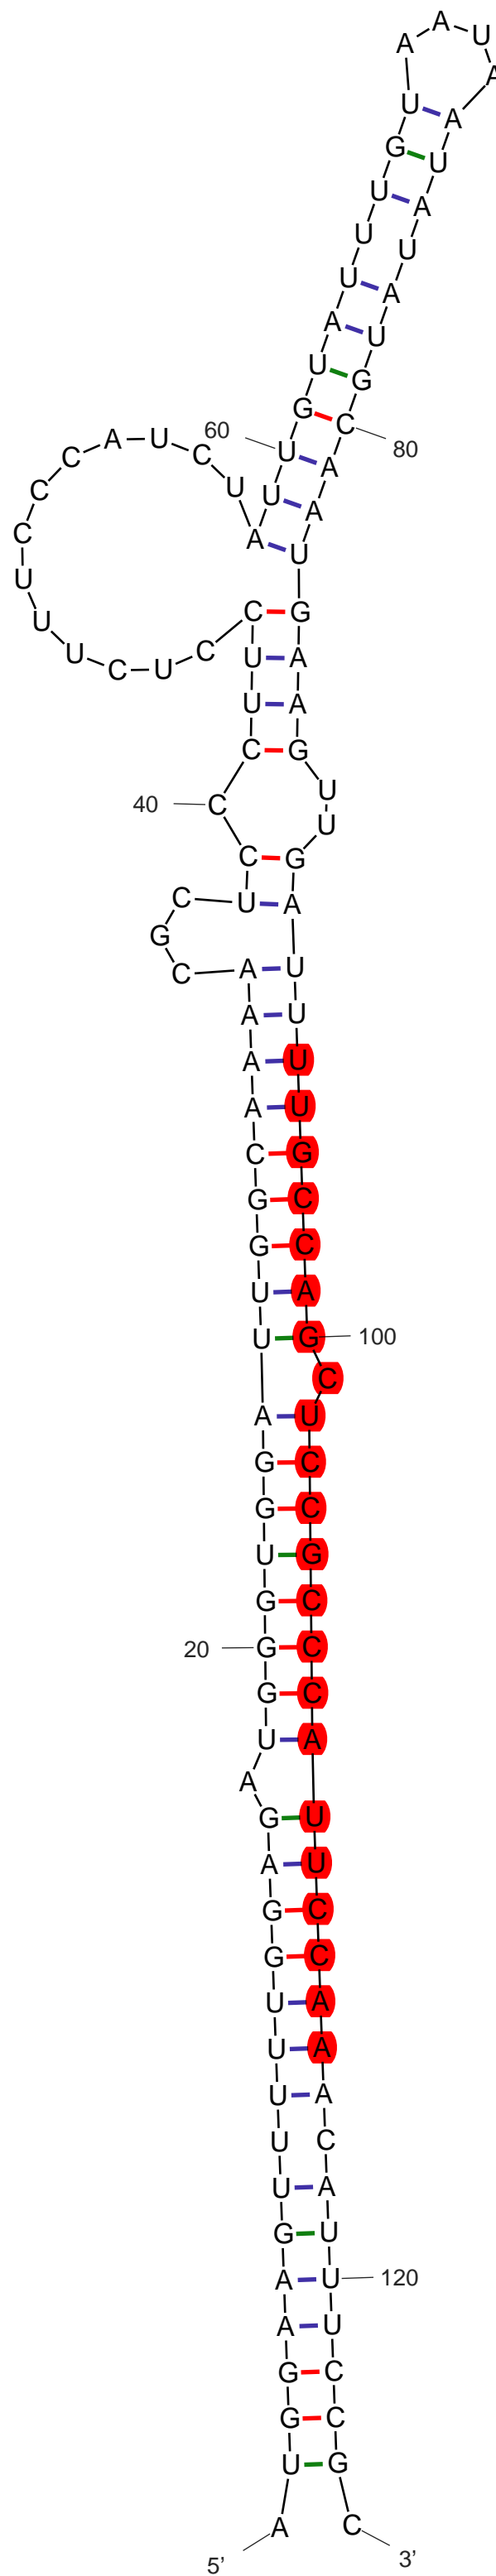

$dG = -46.70$  [Initially  $-46.70$ ] 137-MIR482

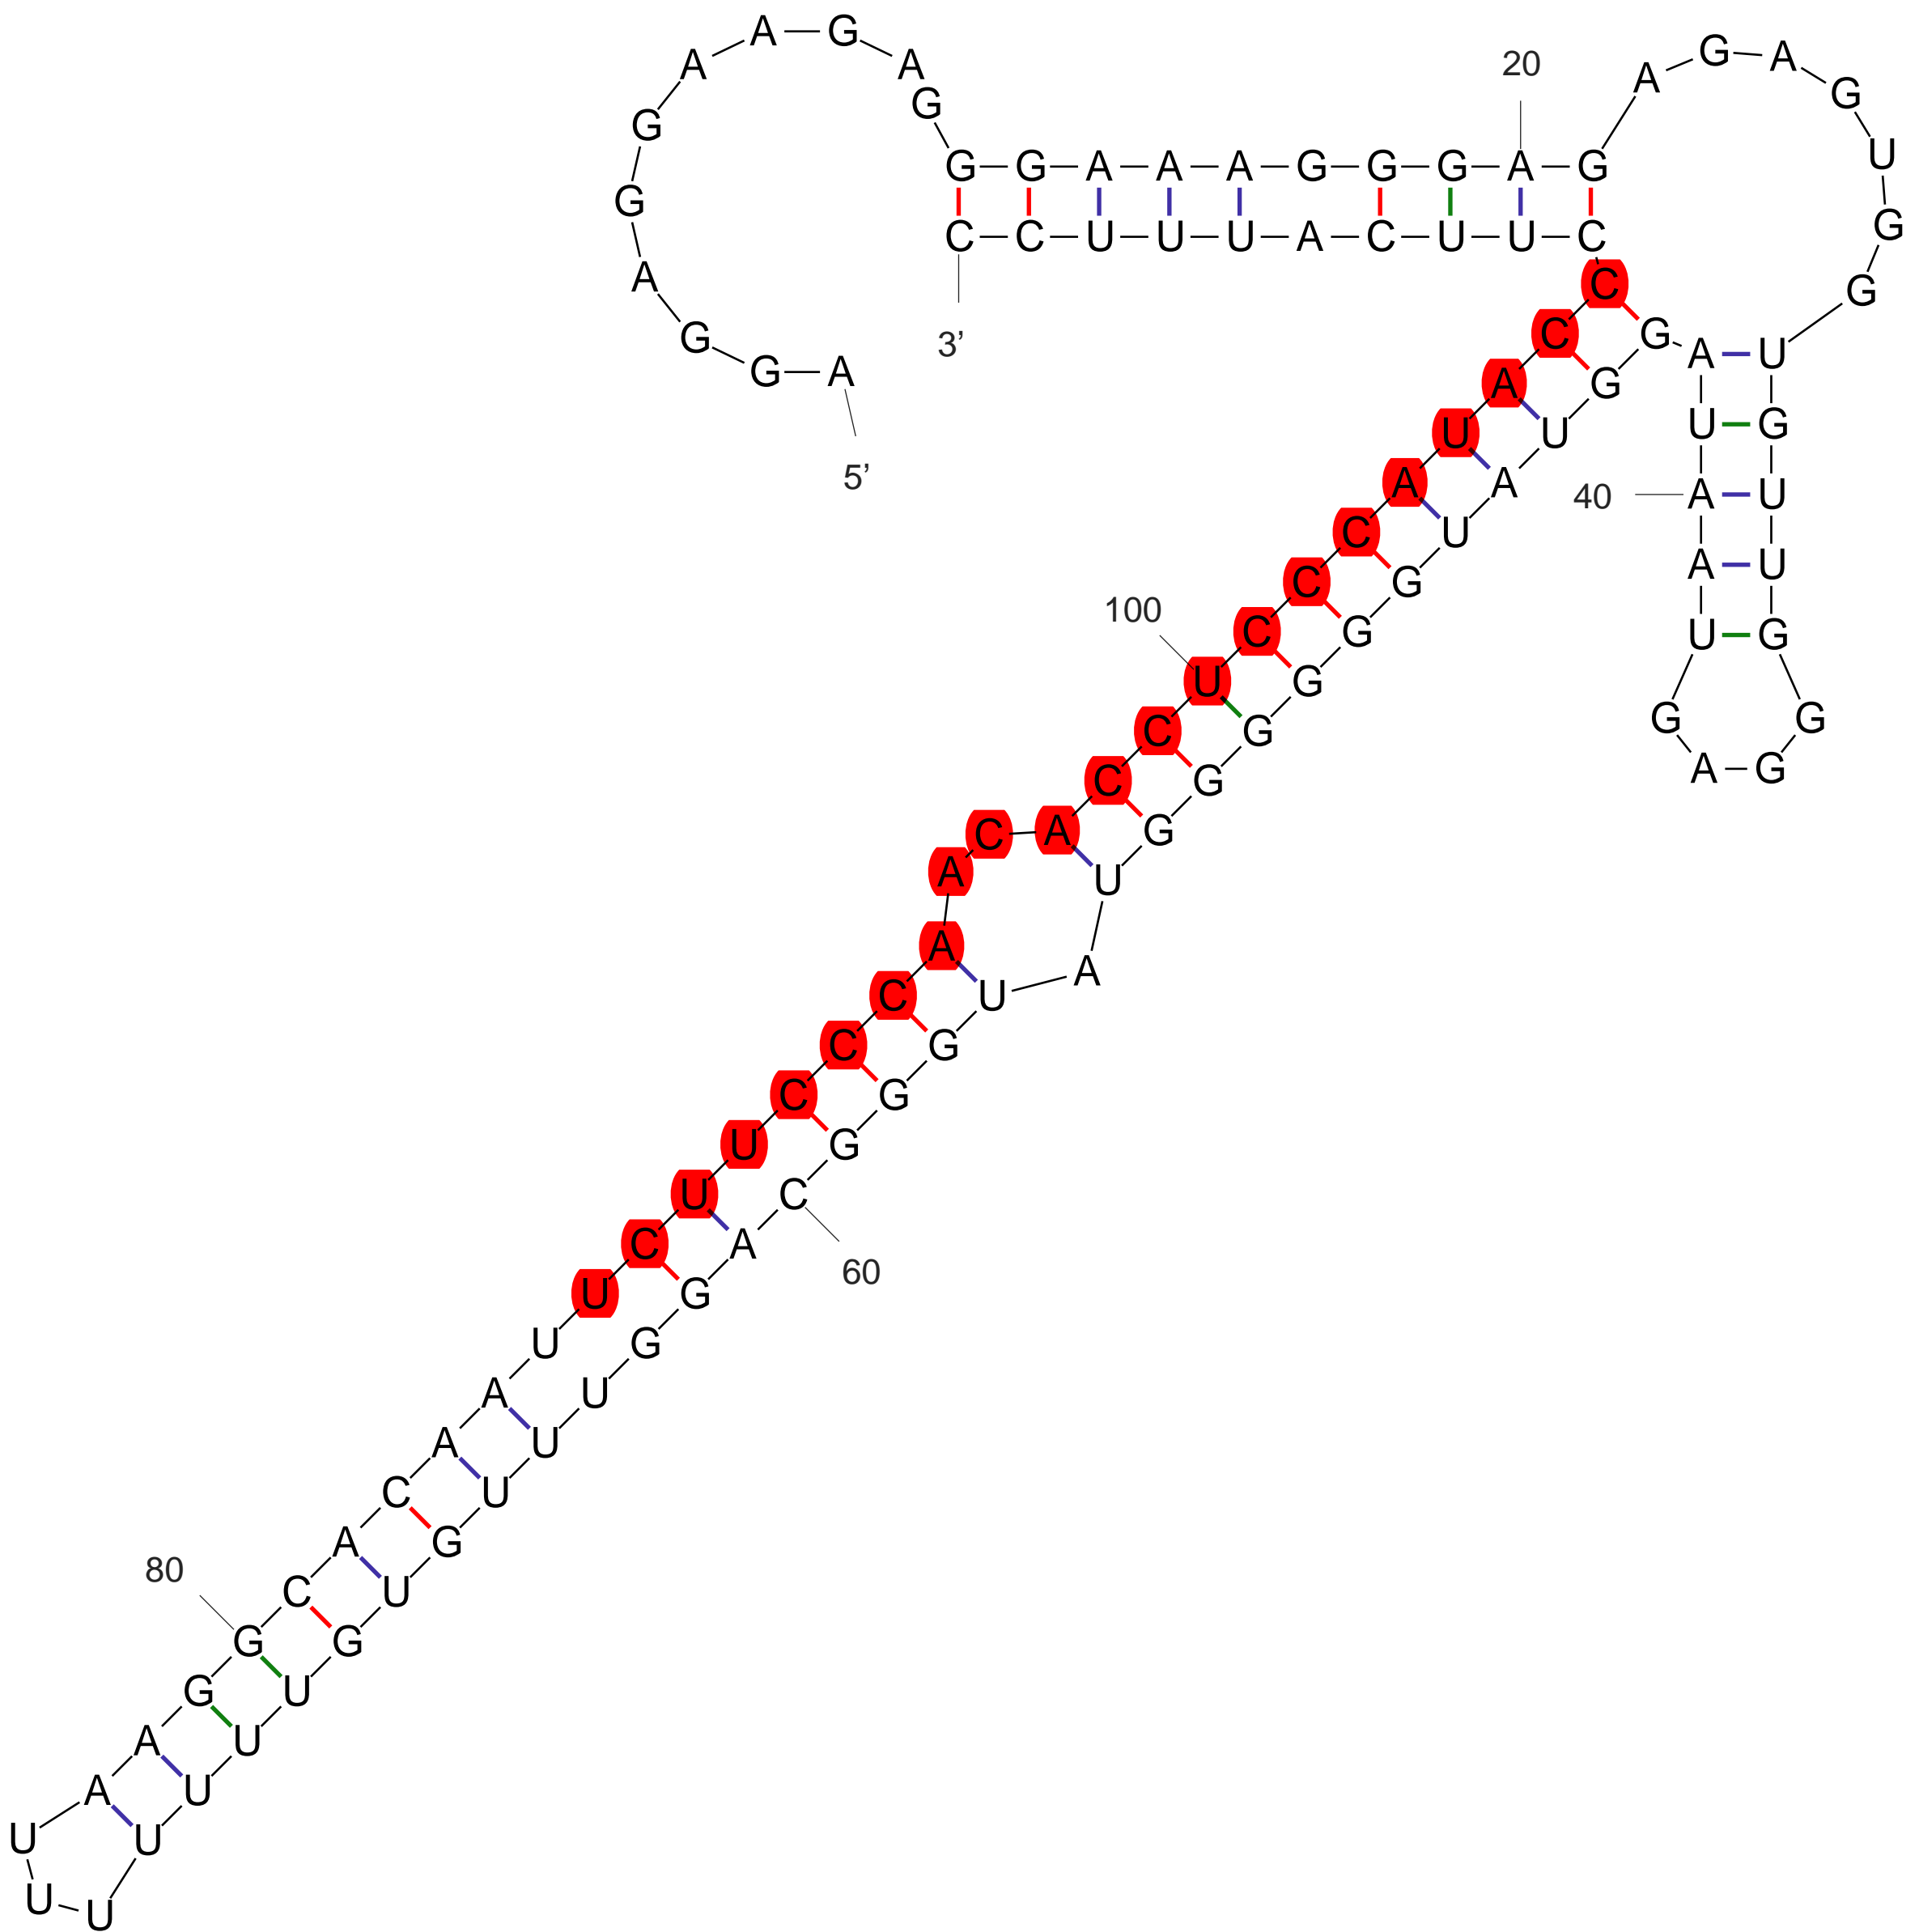

$dG = -42.93$  [Initially -43.70] 138-MIR482



$dG = -46.70$  [Initially  $-46.70$ ] 139-MIR482



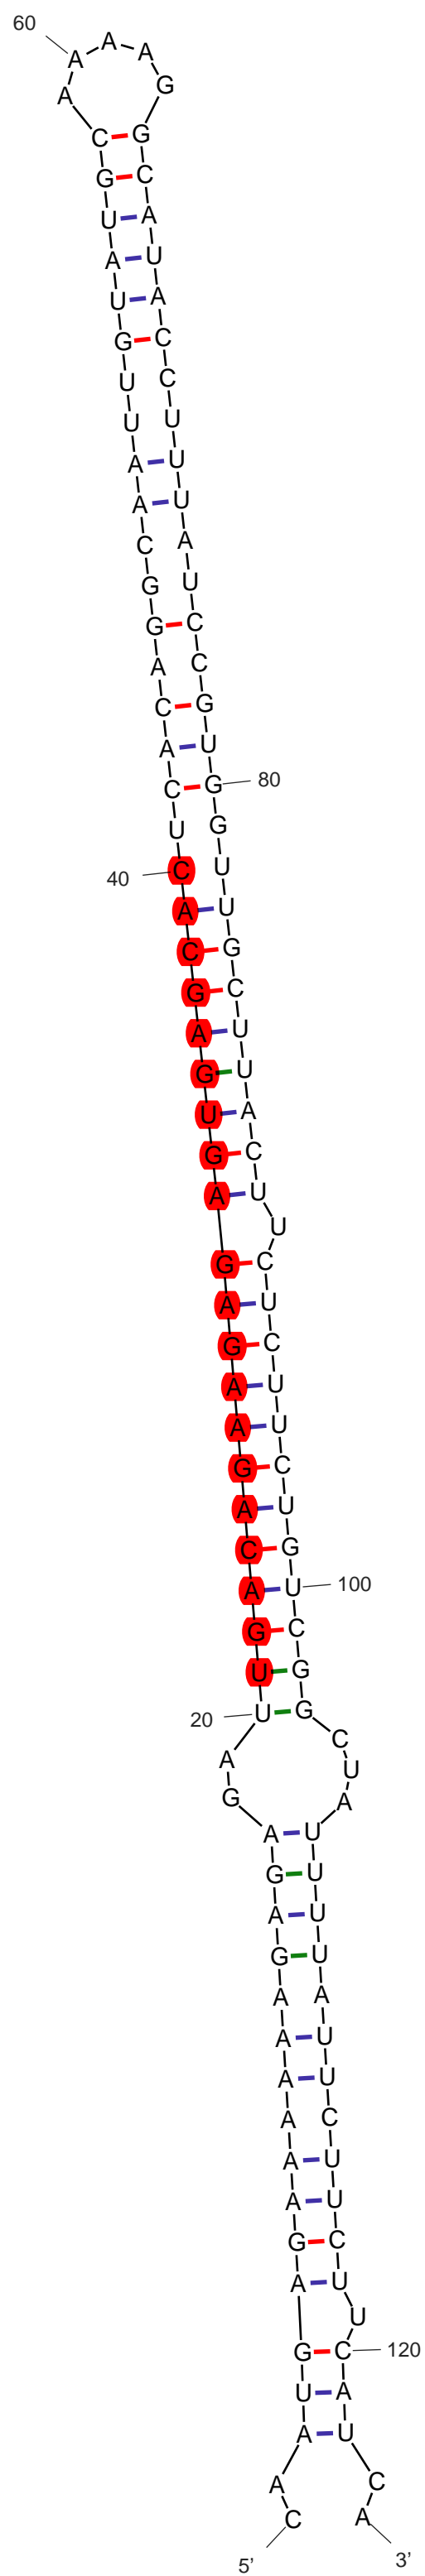

$dG = -48.80$  [Initially  $-48.80$ ] 13-MIR156

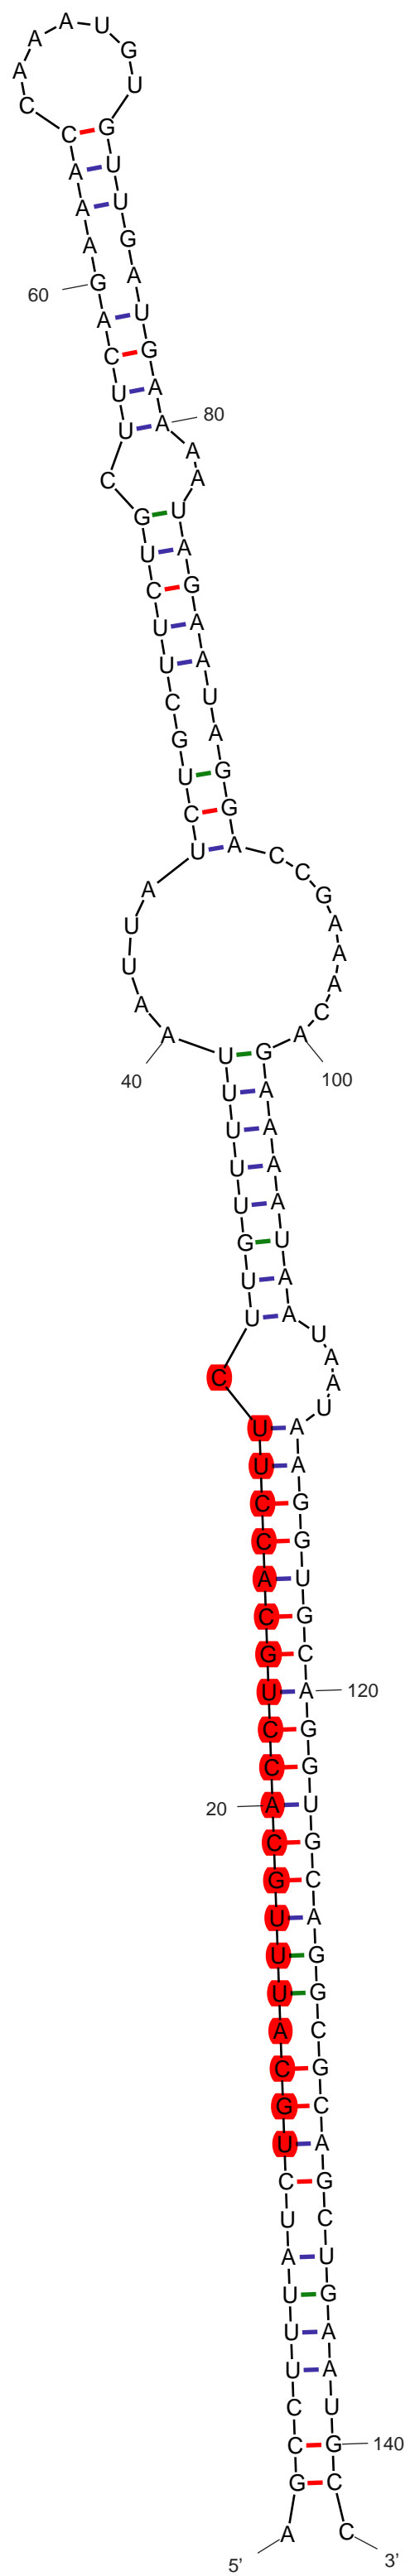

$dG = -48.80$  [Initially  $-48.80$ ] 148-MIR530

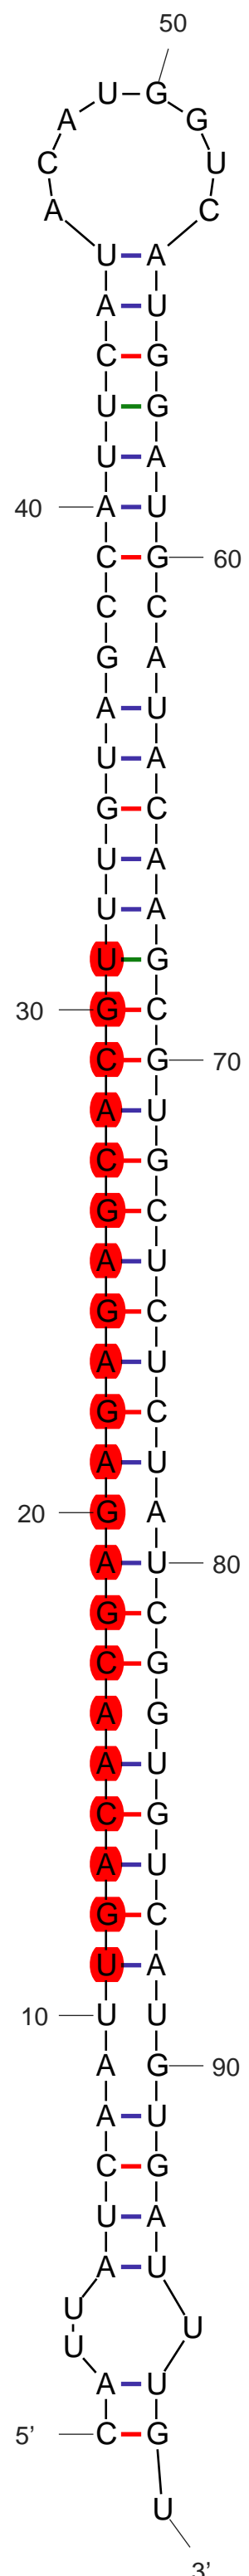

$dG = -47.30$  [Initially -47.30] 149-MIR535-[tcc-MIR535 MI0017532]



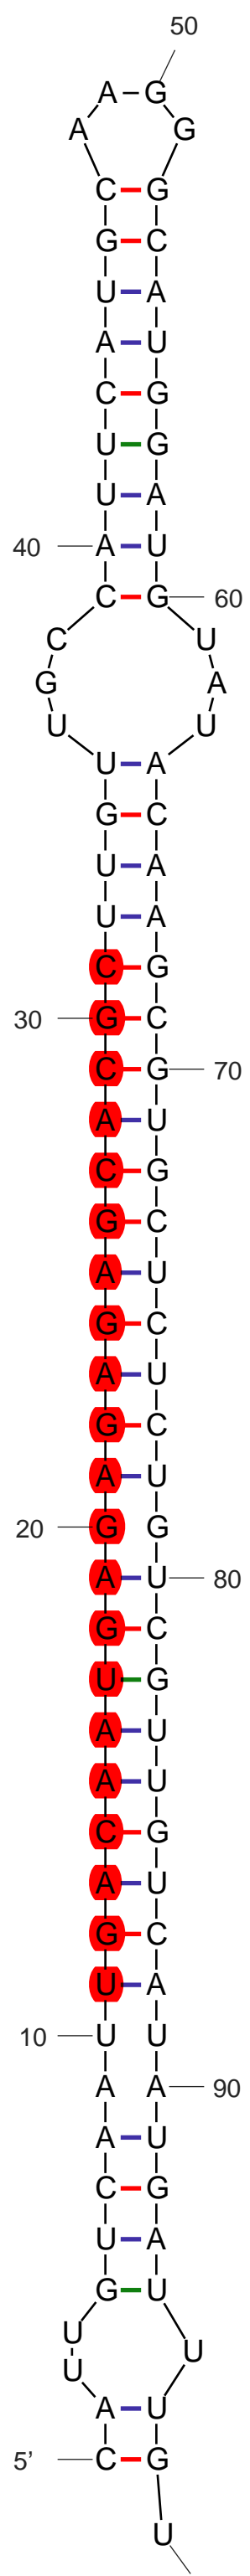

$dG = -58.90$  [Initially -58.90] 150-MIR535-[tcc-MIR535 MI0017532]

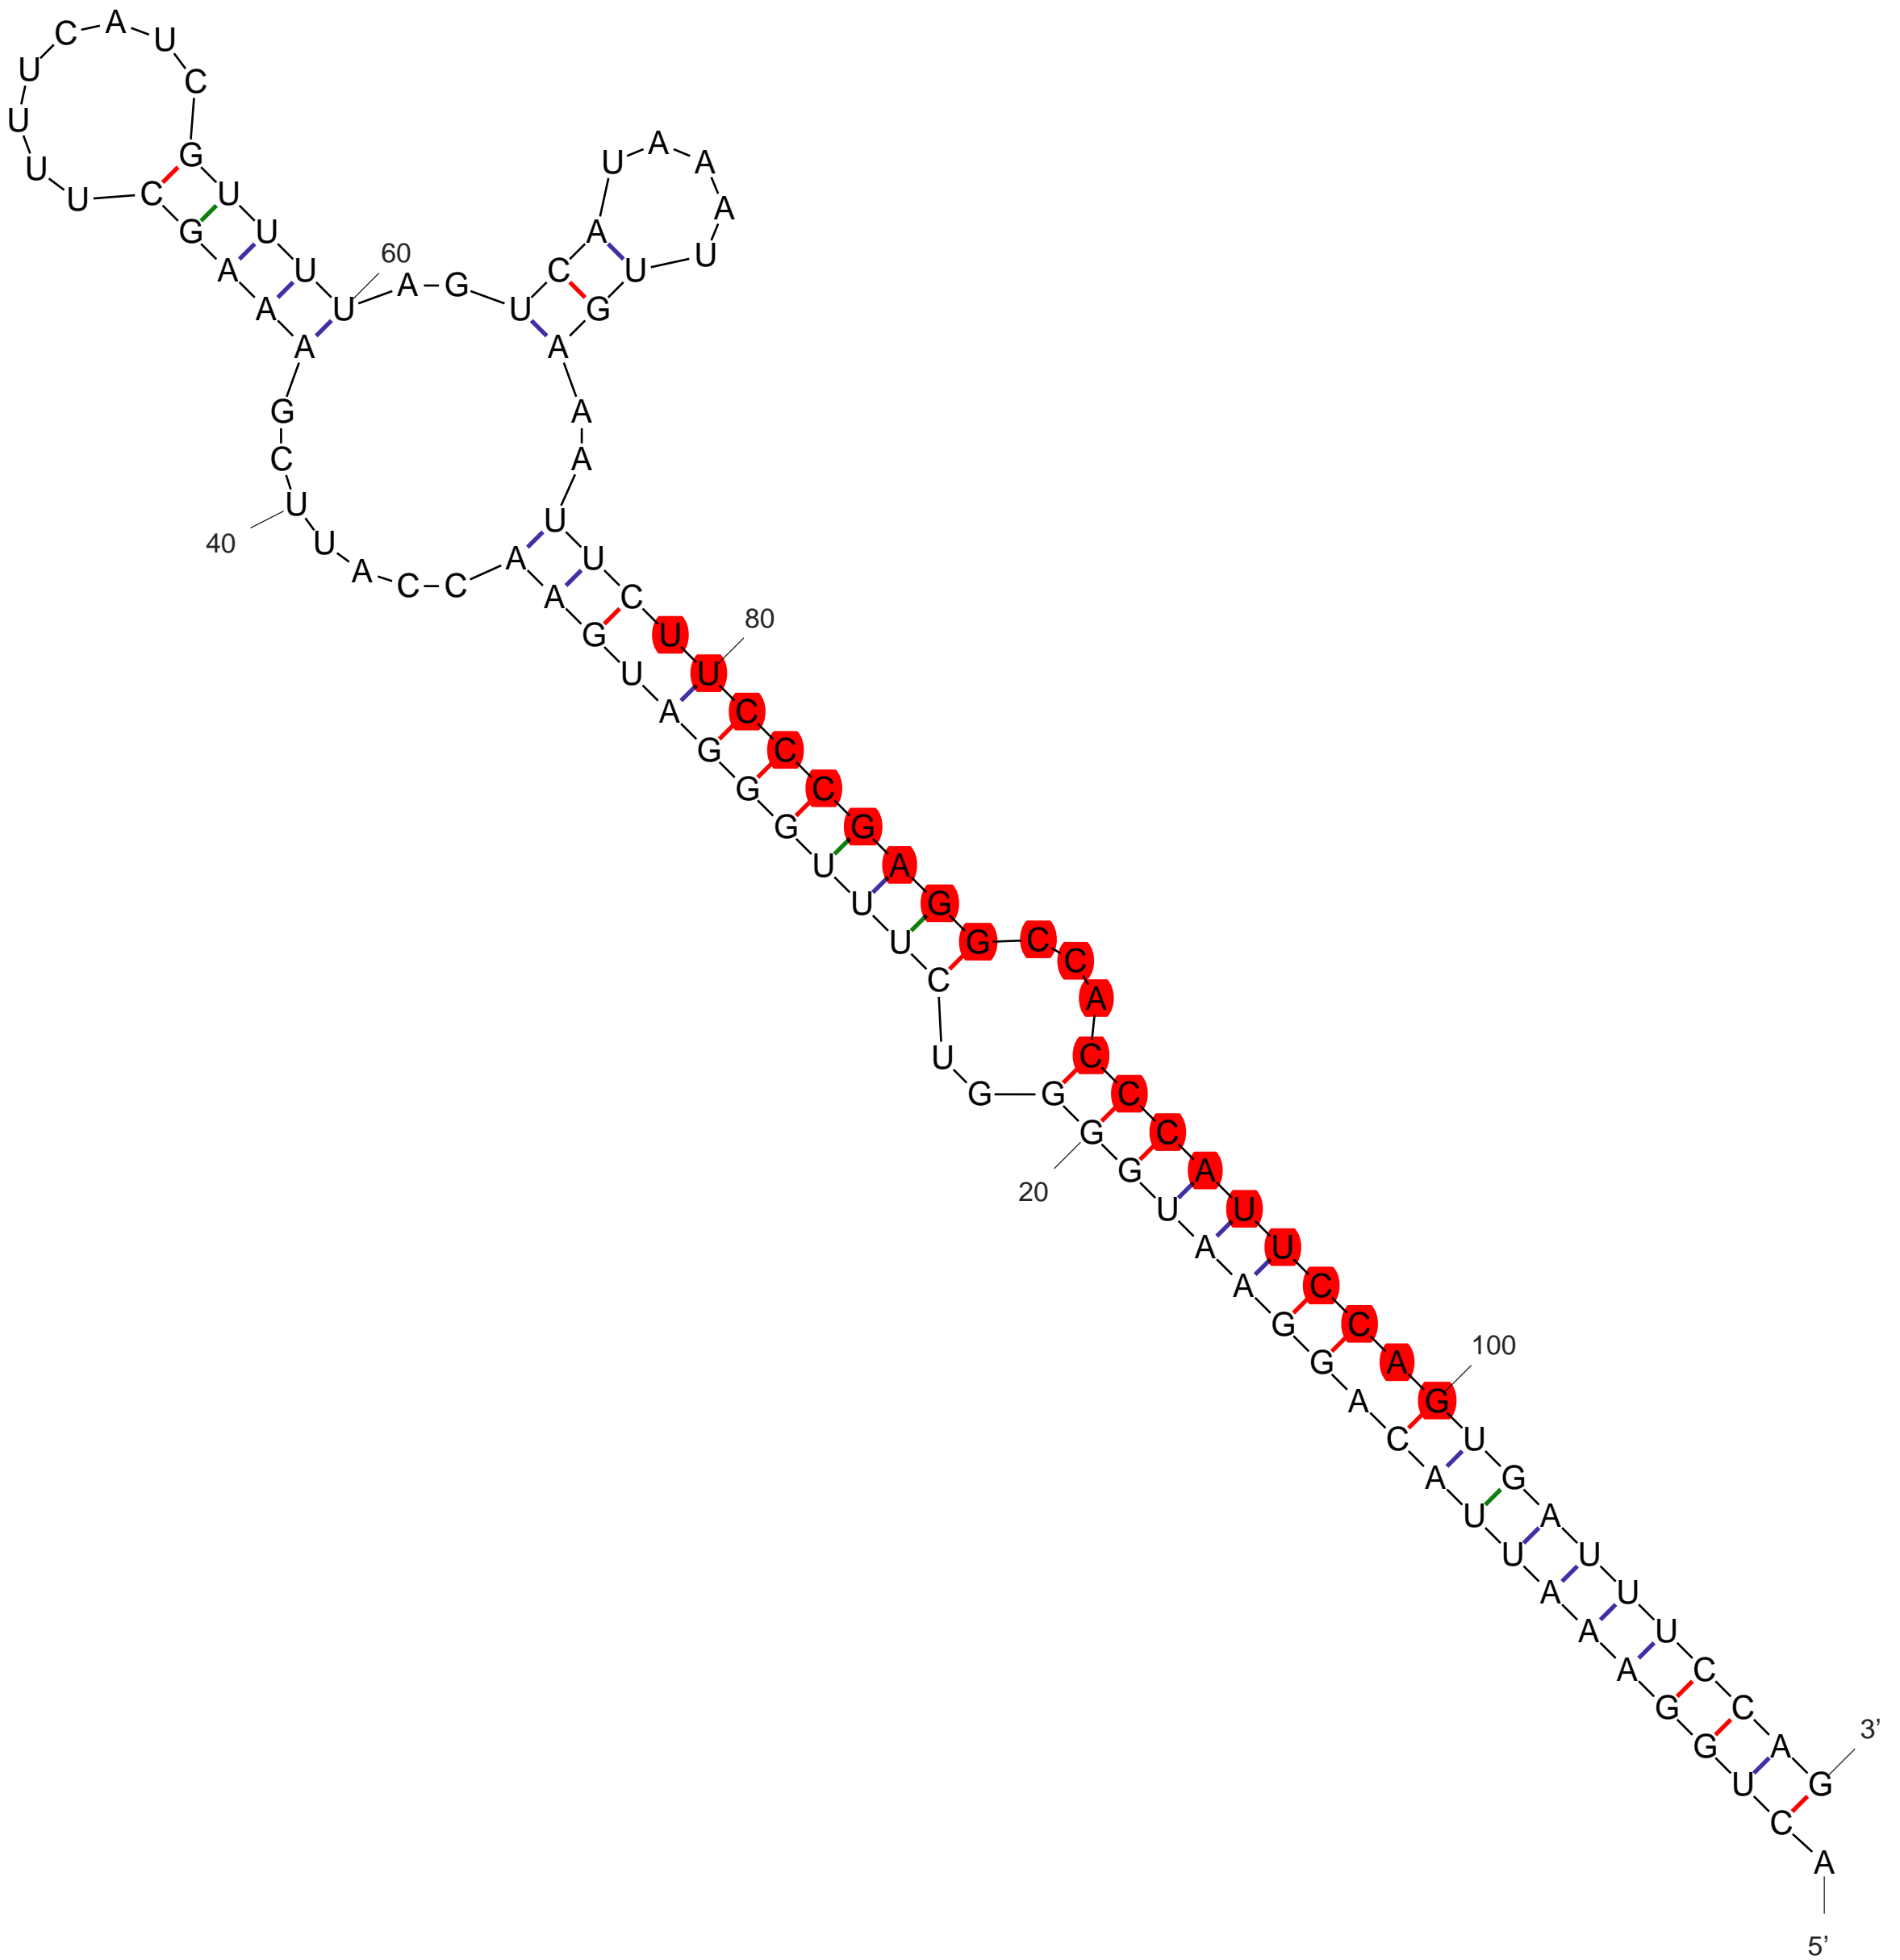

$dG = -42.63$  [Initially -46.00] 151-MIR6118

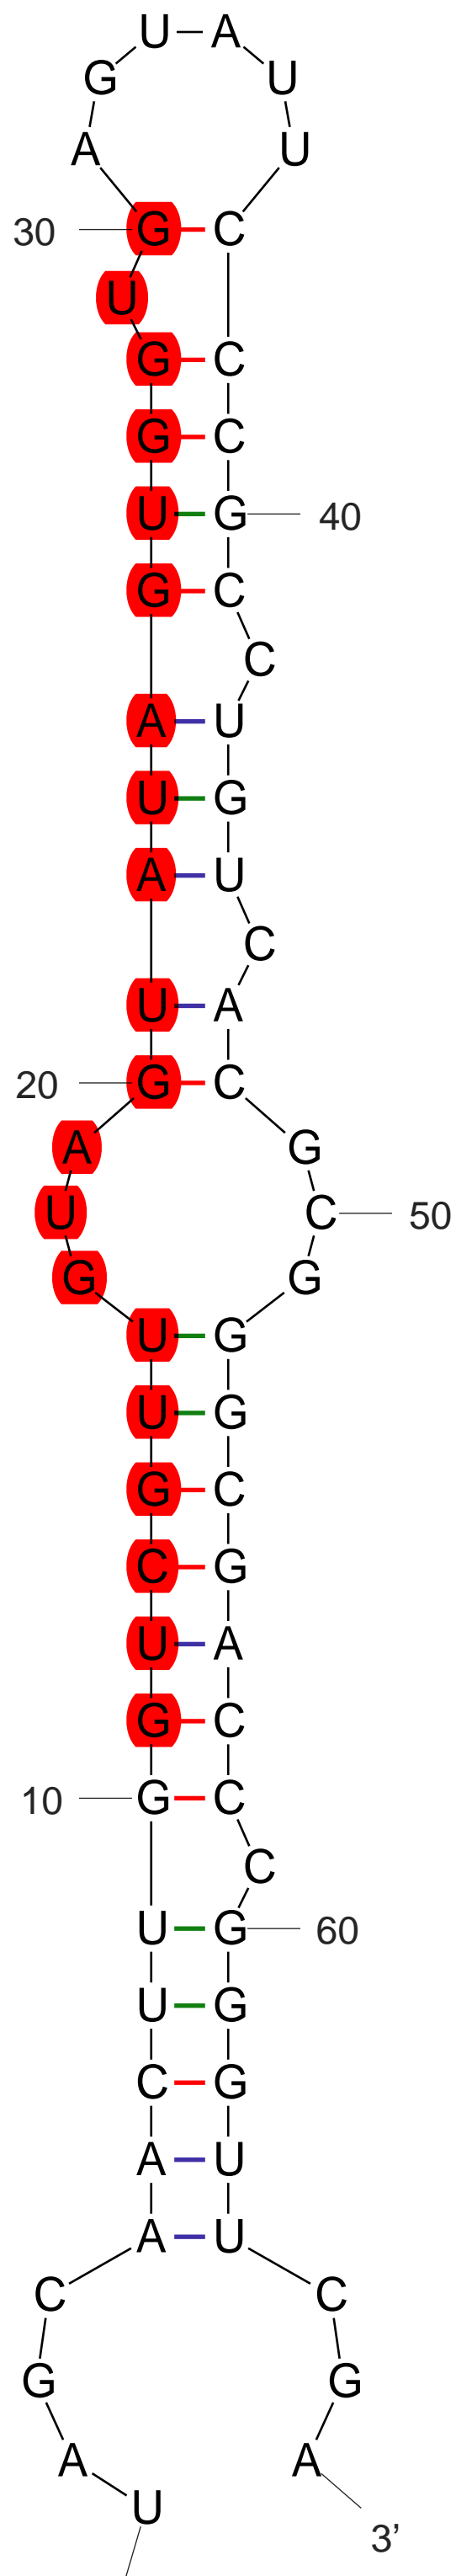

5'  
dG = -18.70 [Initially -18.70] 152-MIR6300

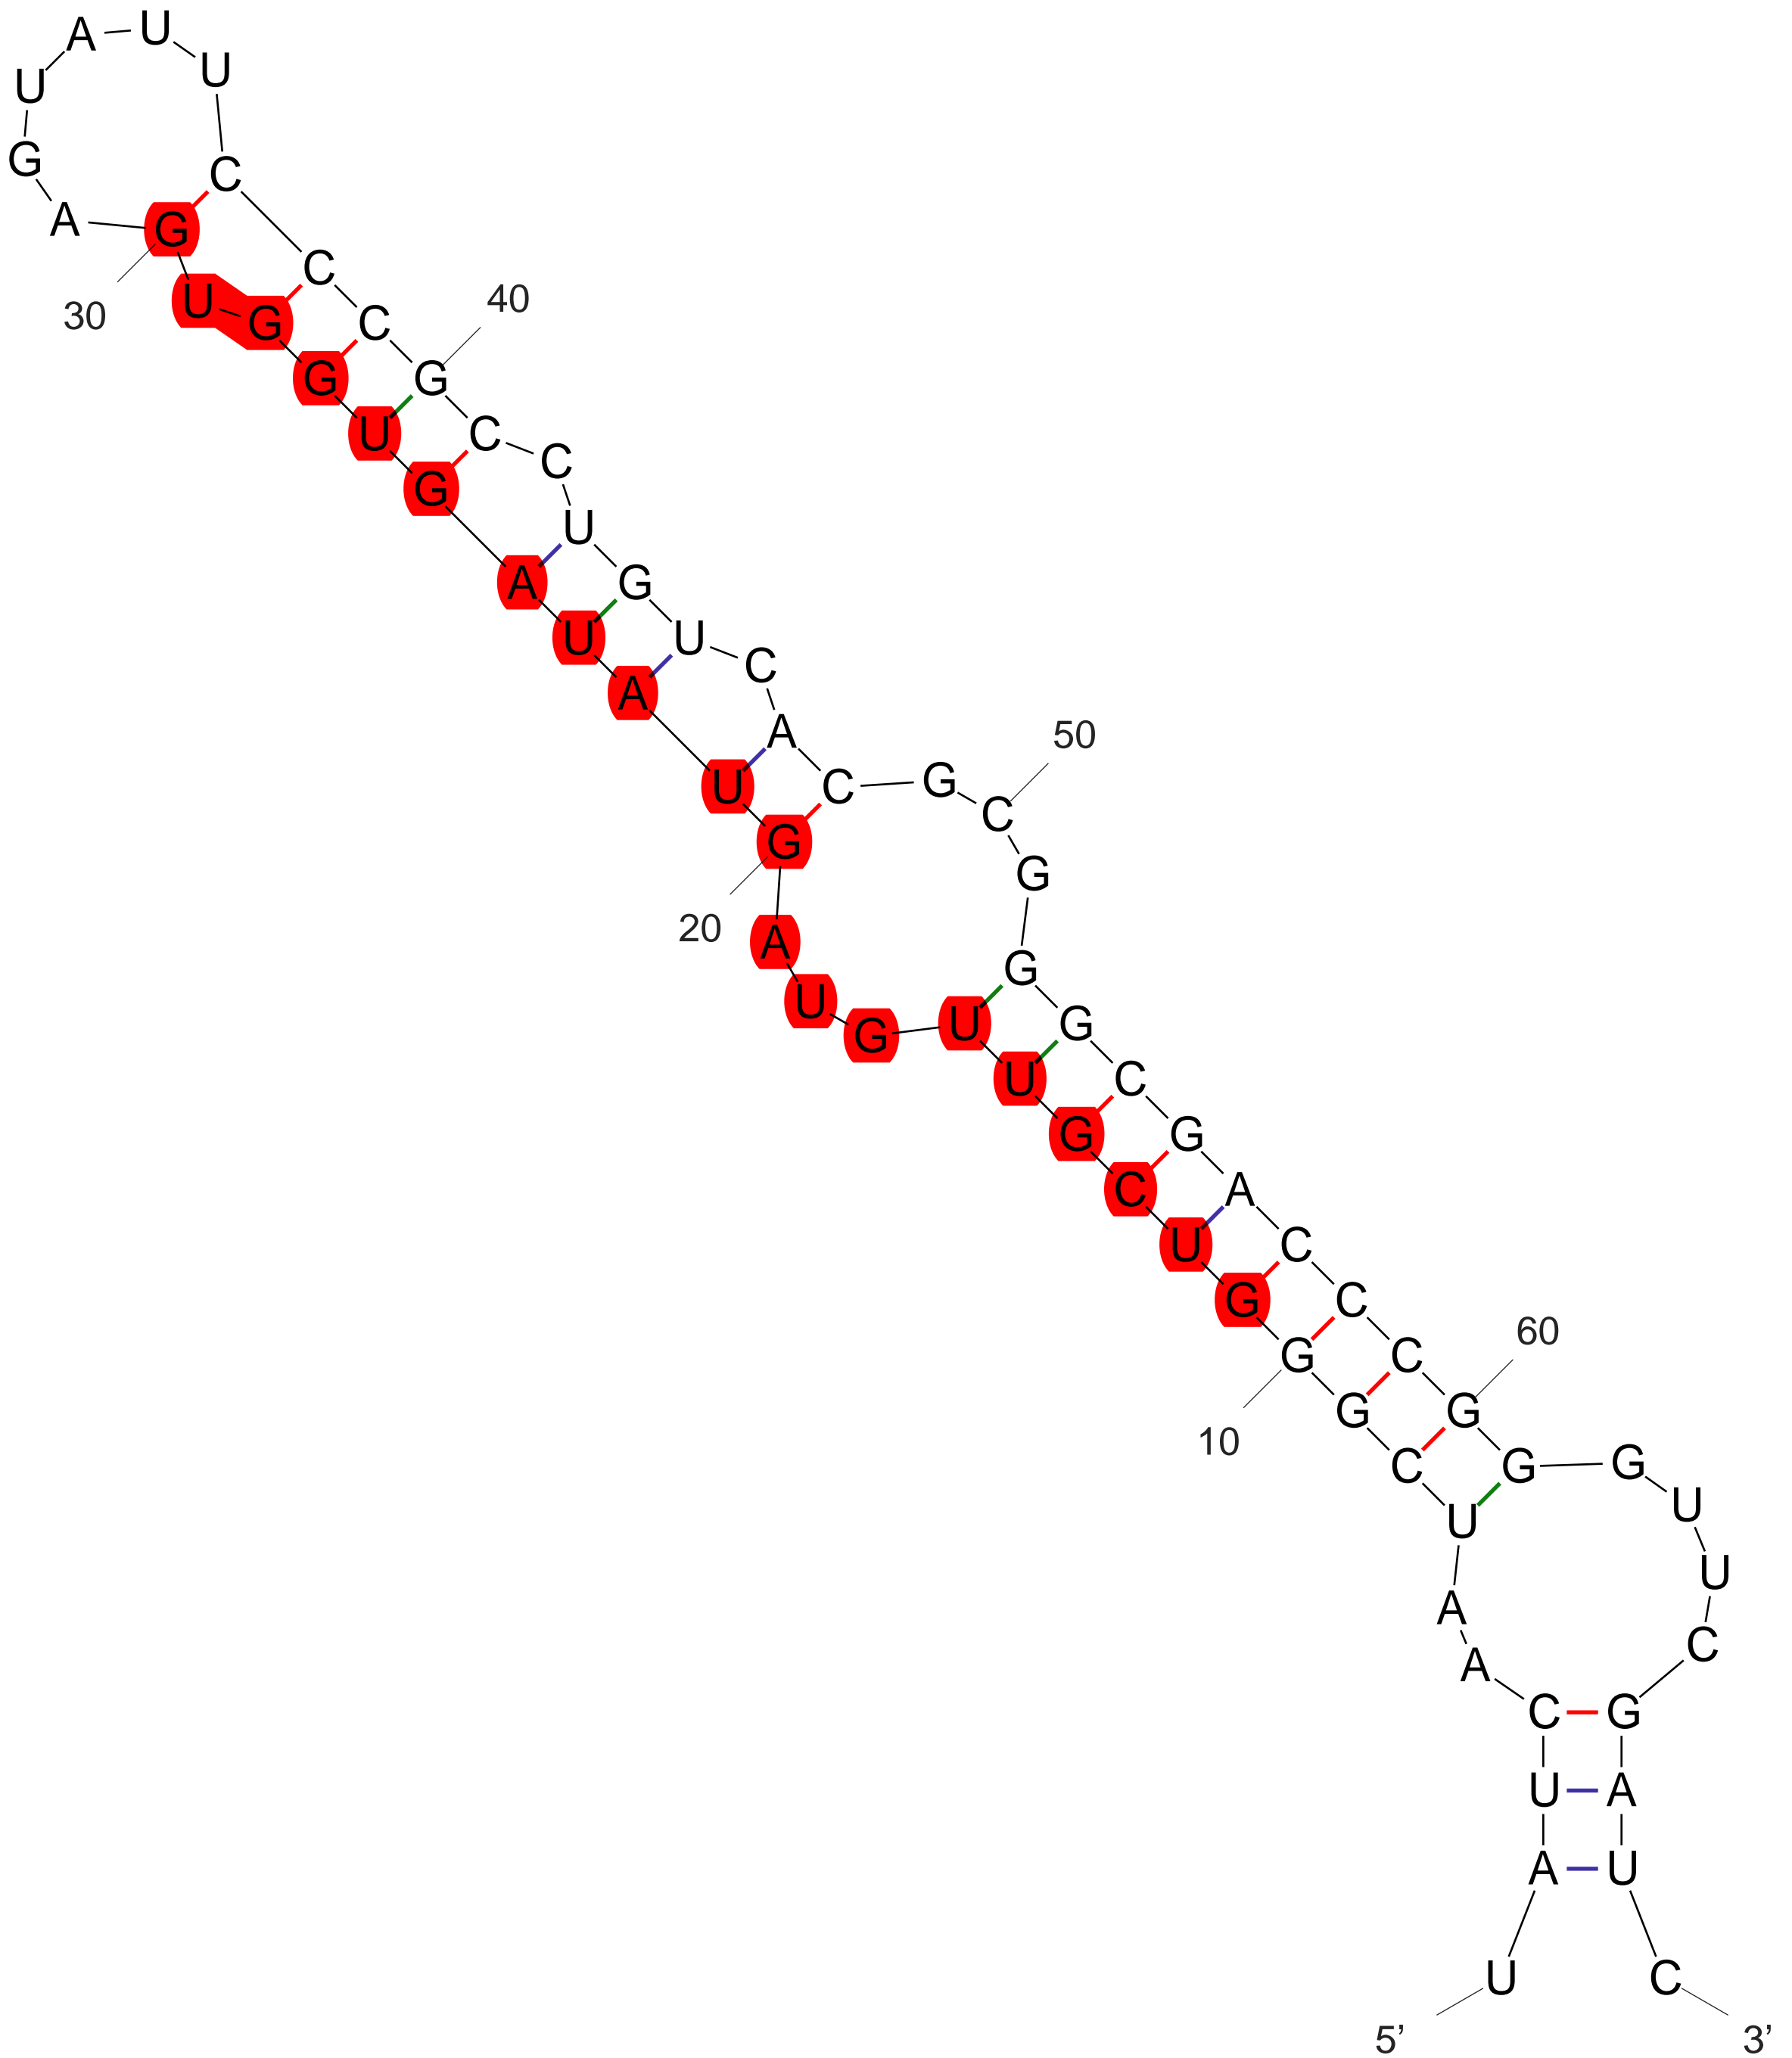

$dG = -23.40$  [Initially -23.40] 153-MIR6300



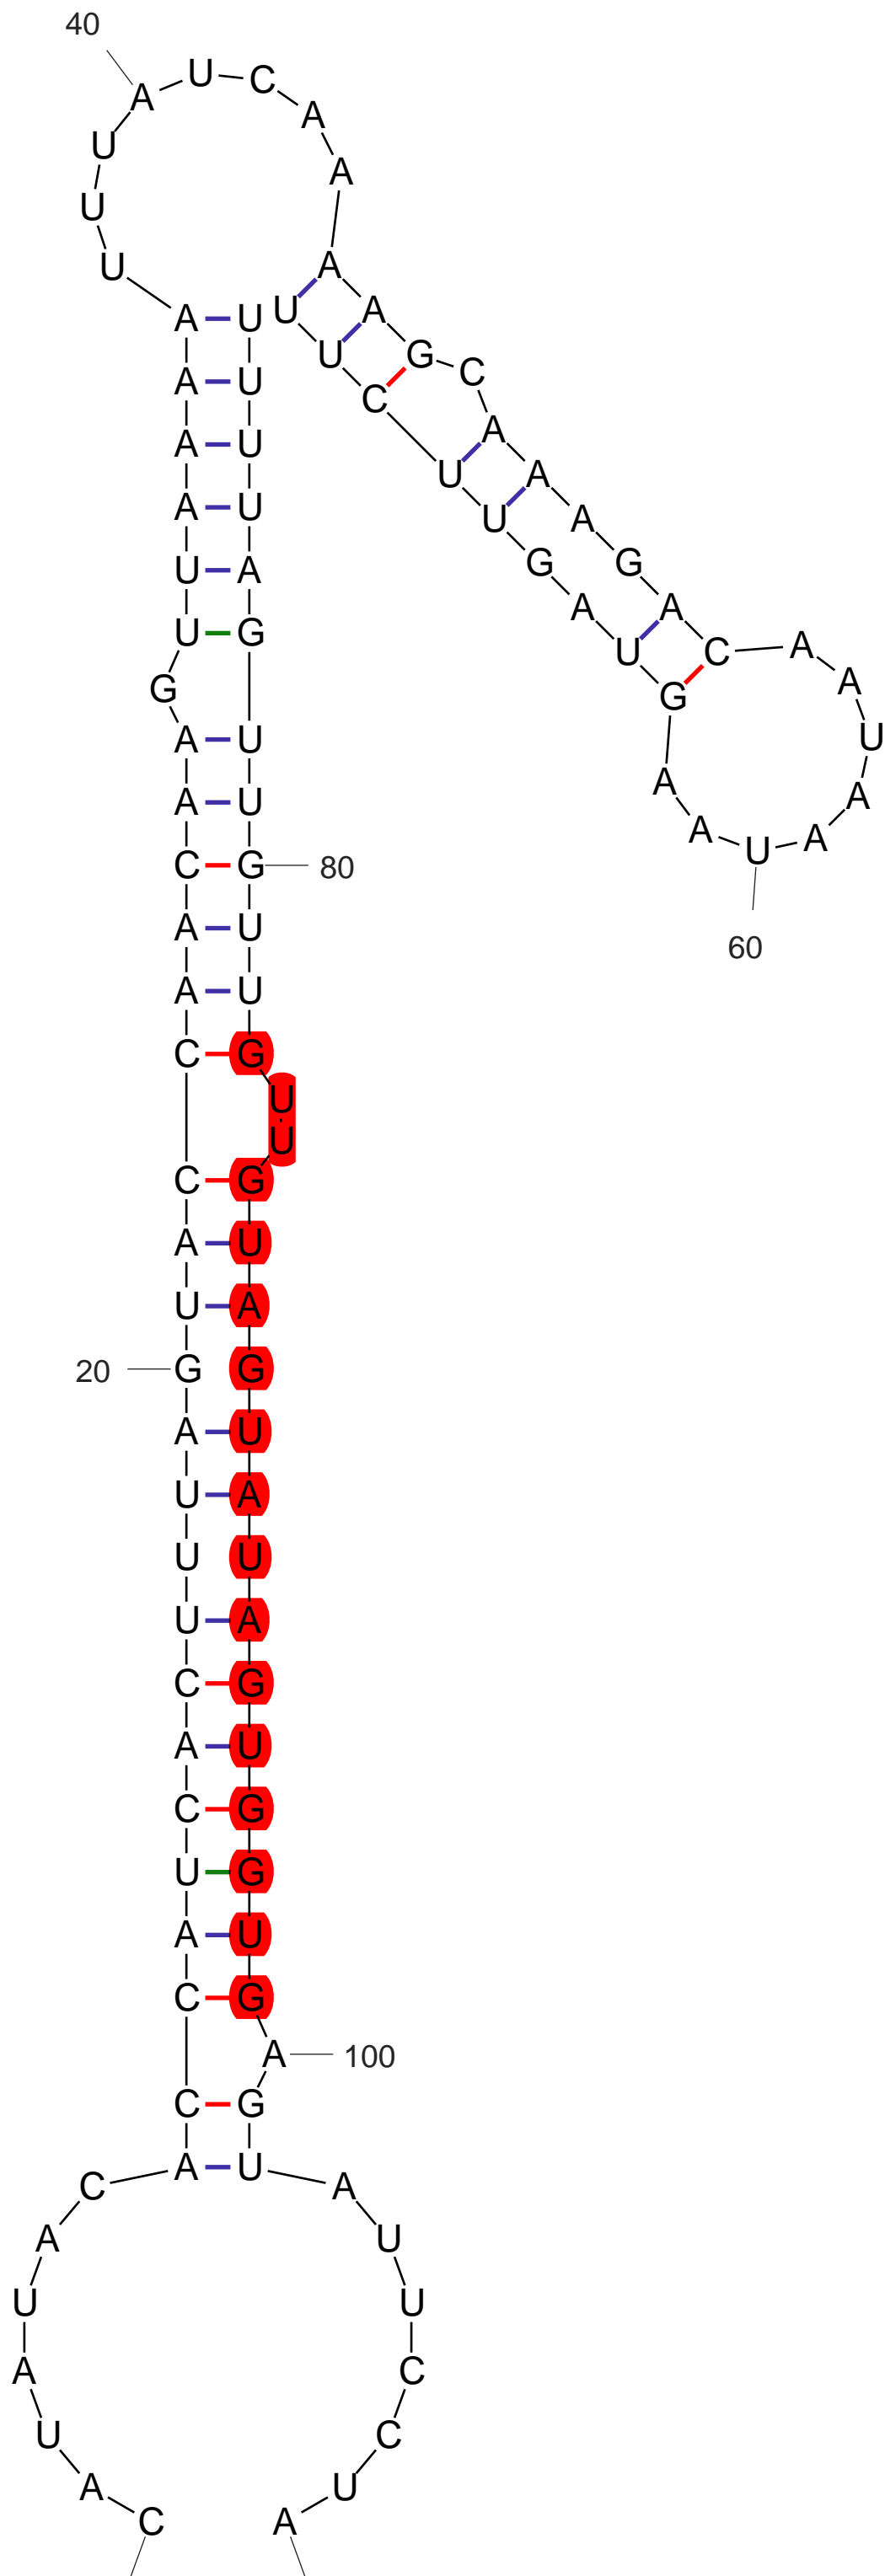

dG = -19.30 [Initially -19.30] 154-MIR6300

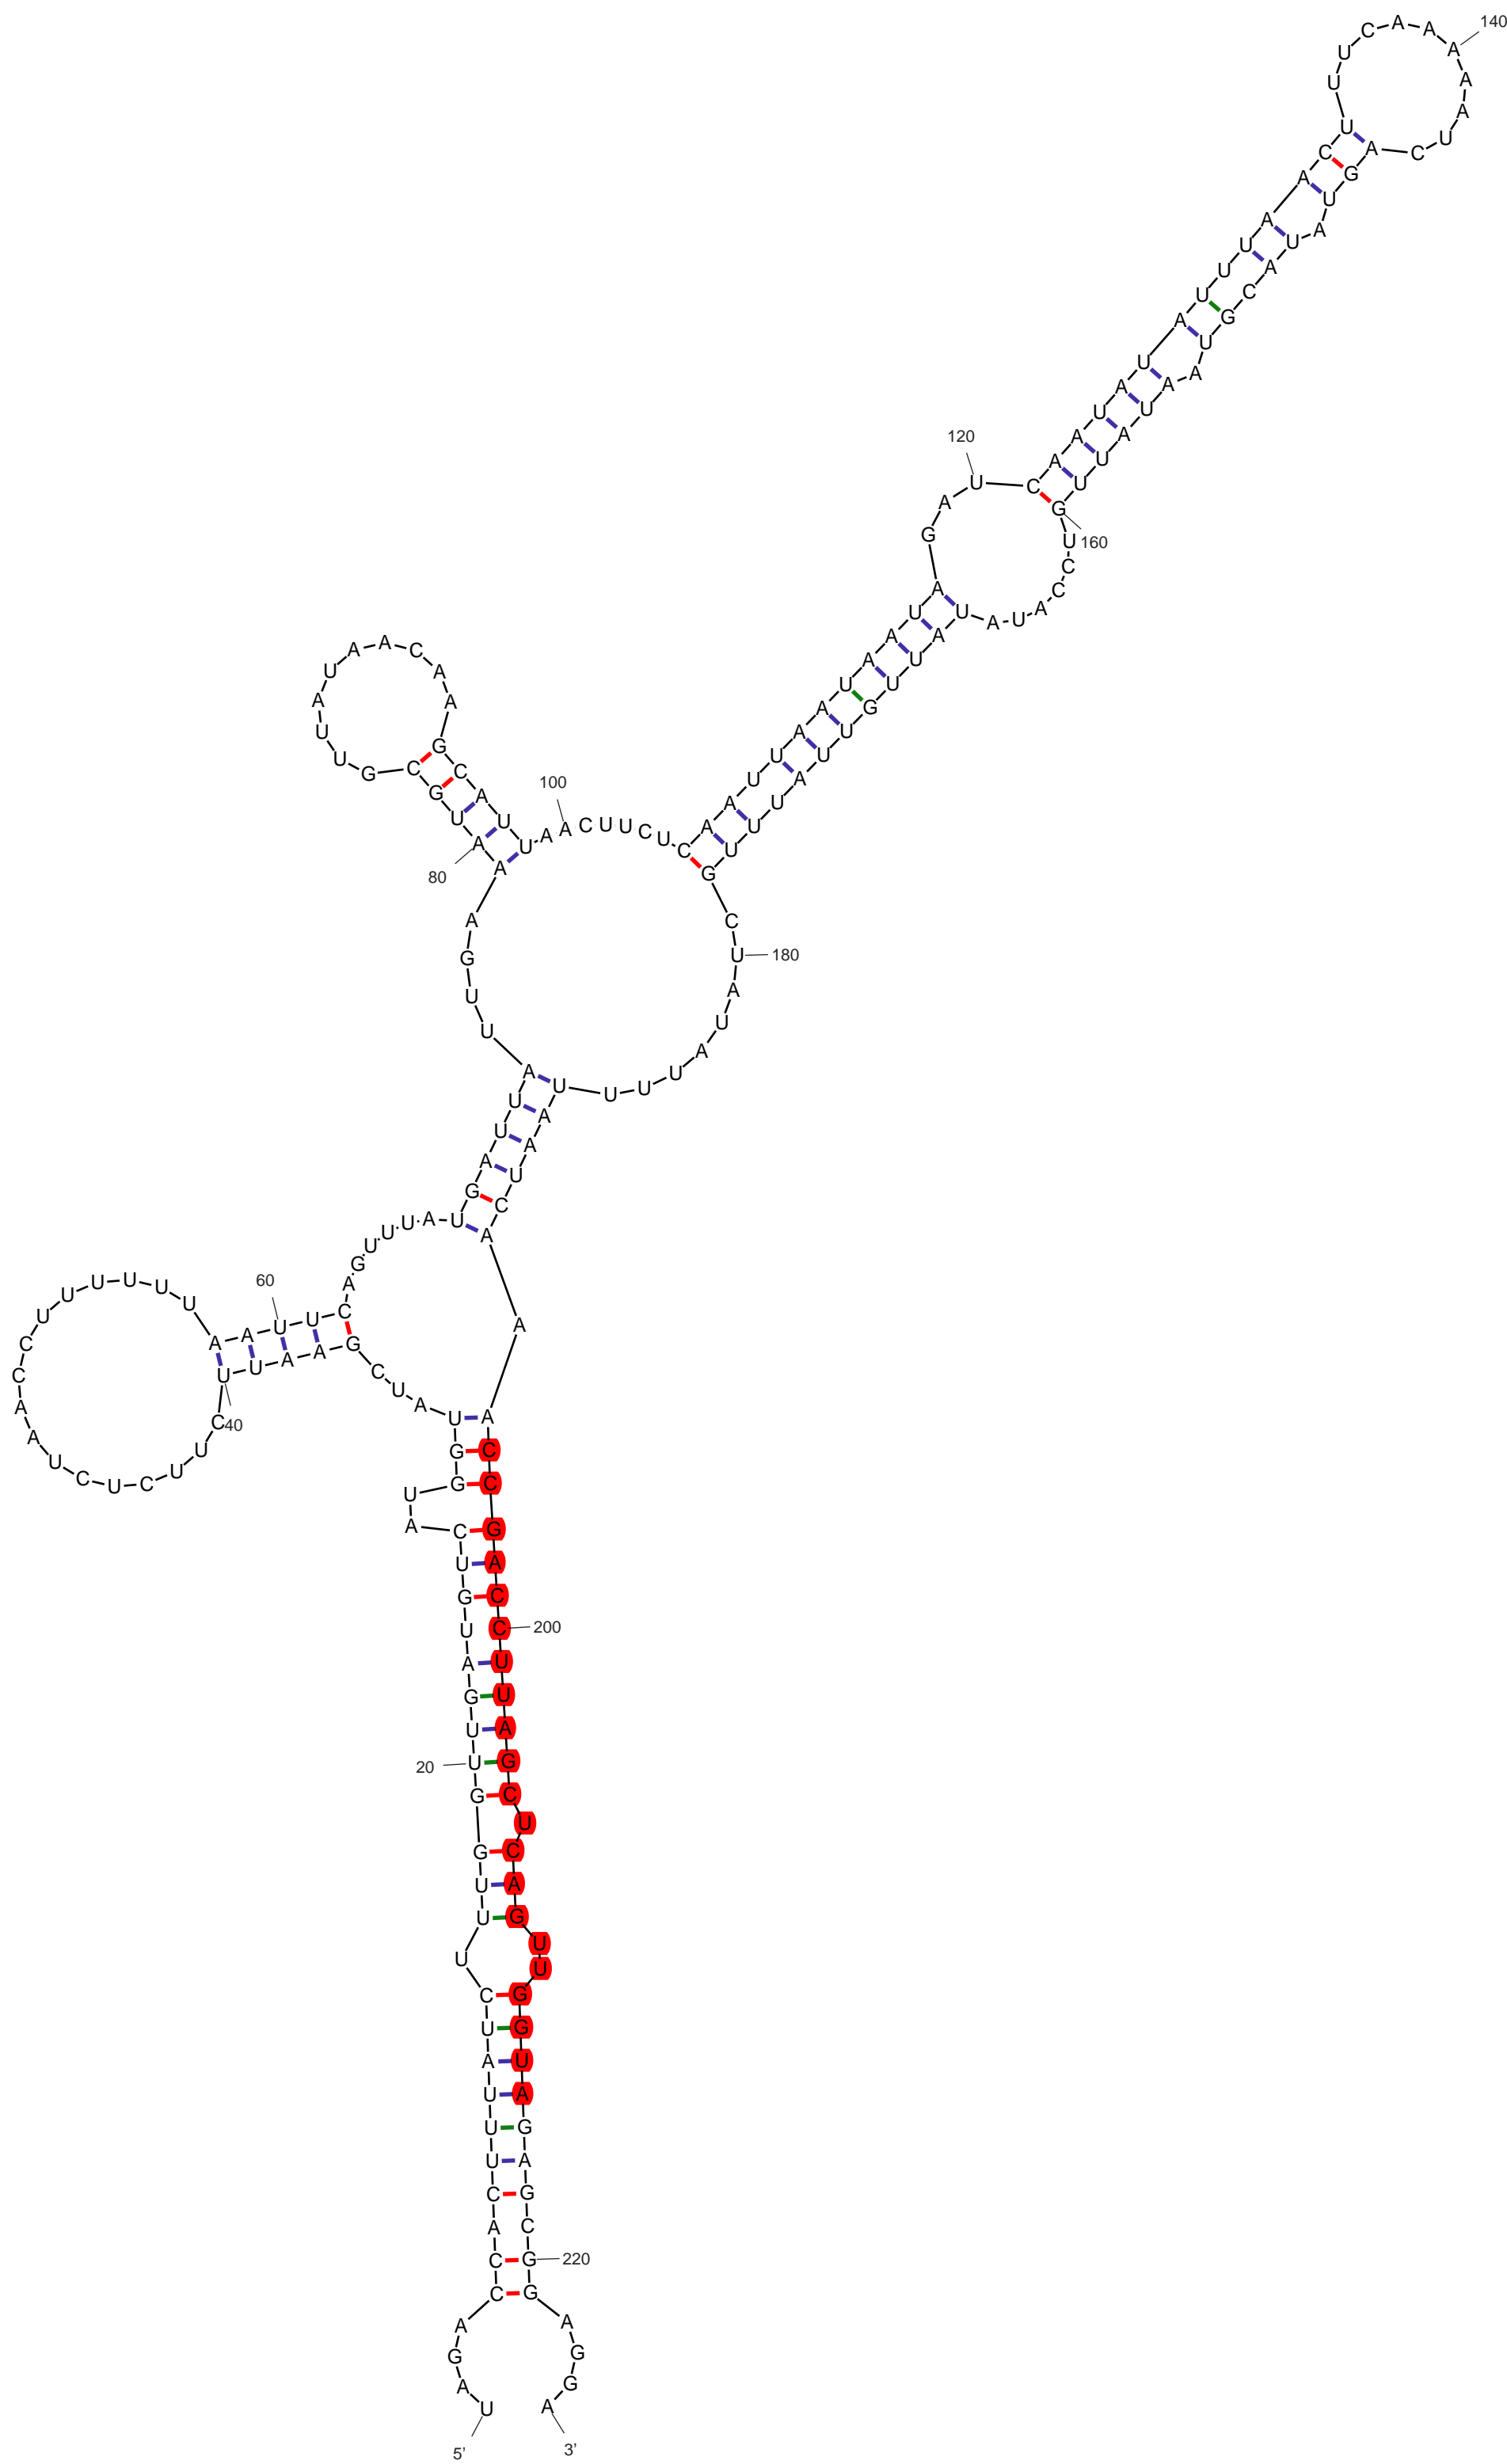

**dG = -29.57 [Initially -36.30] 155-MIR6478**

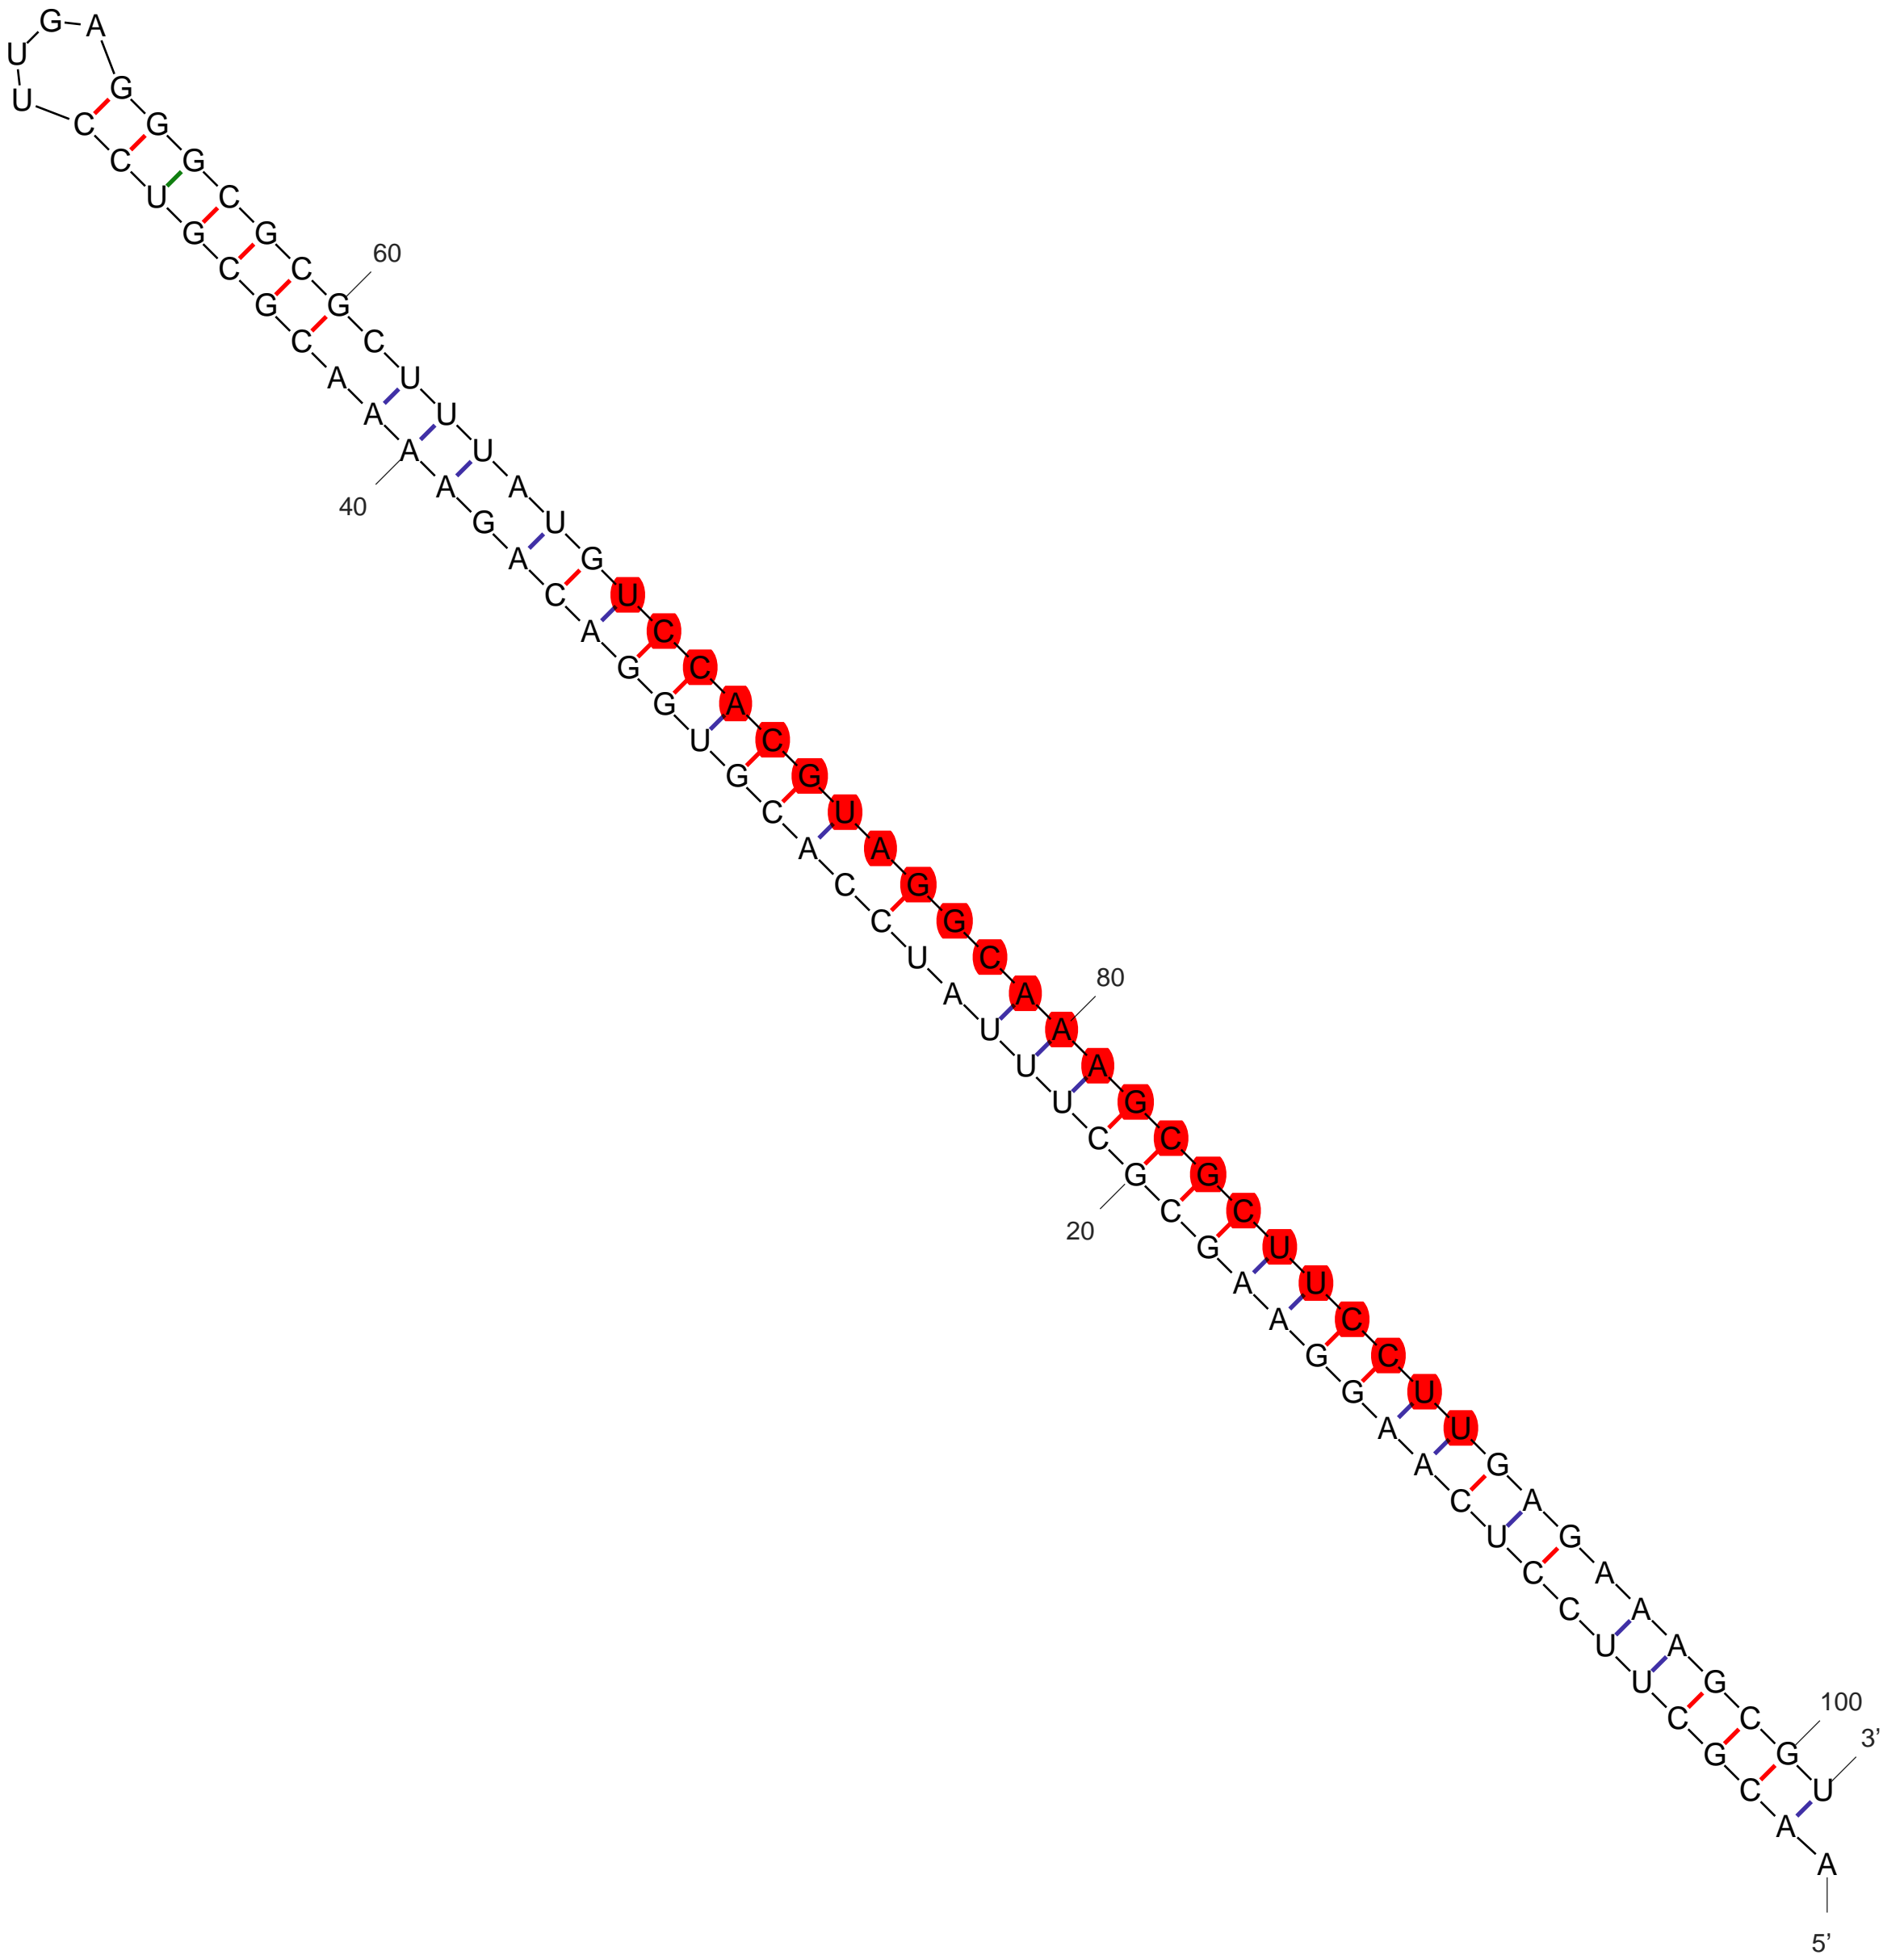

*dG = -70.10 [Initially -70.10] 156-MIR7486*

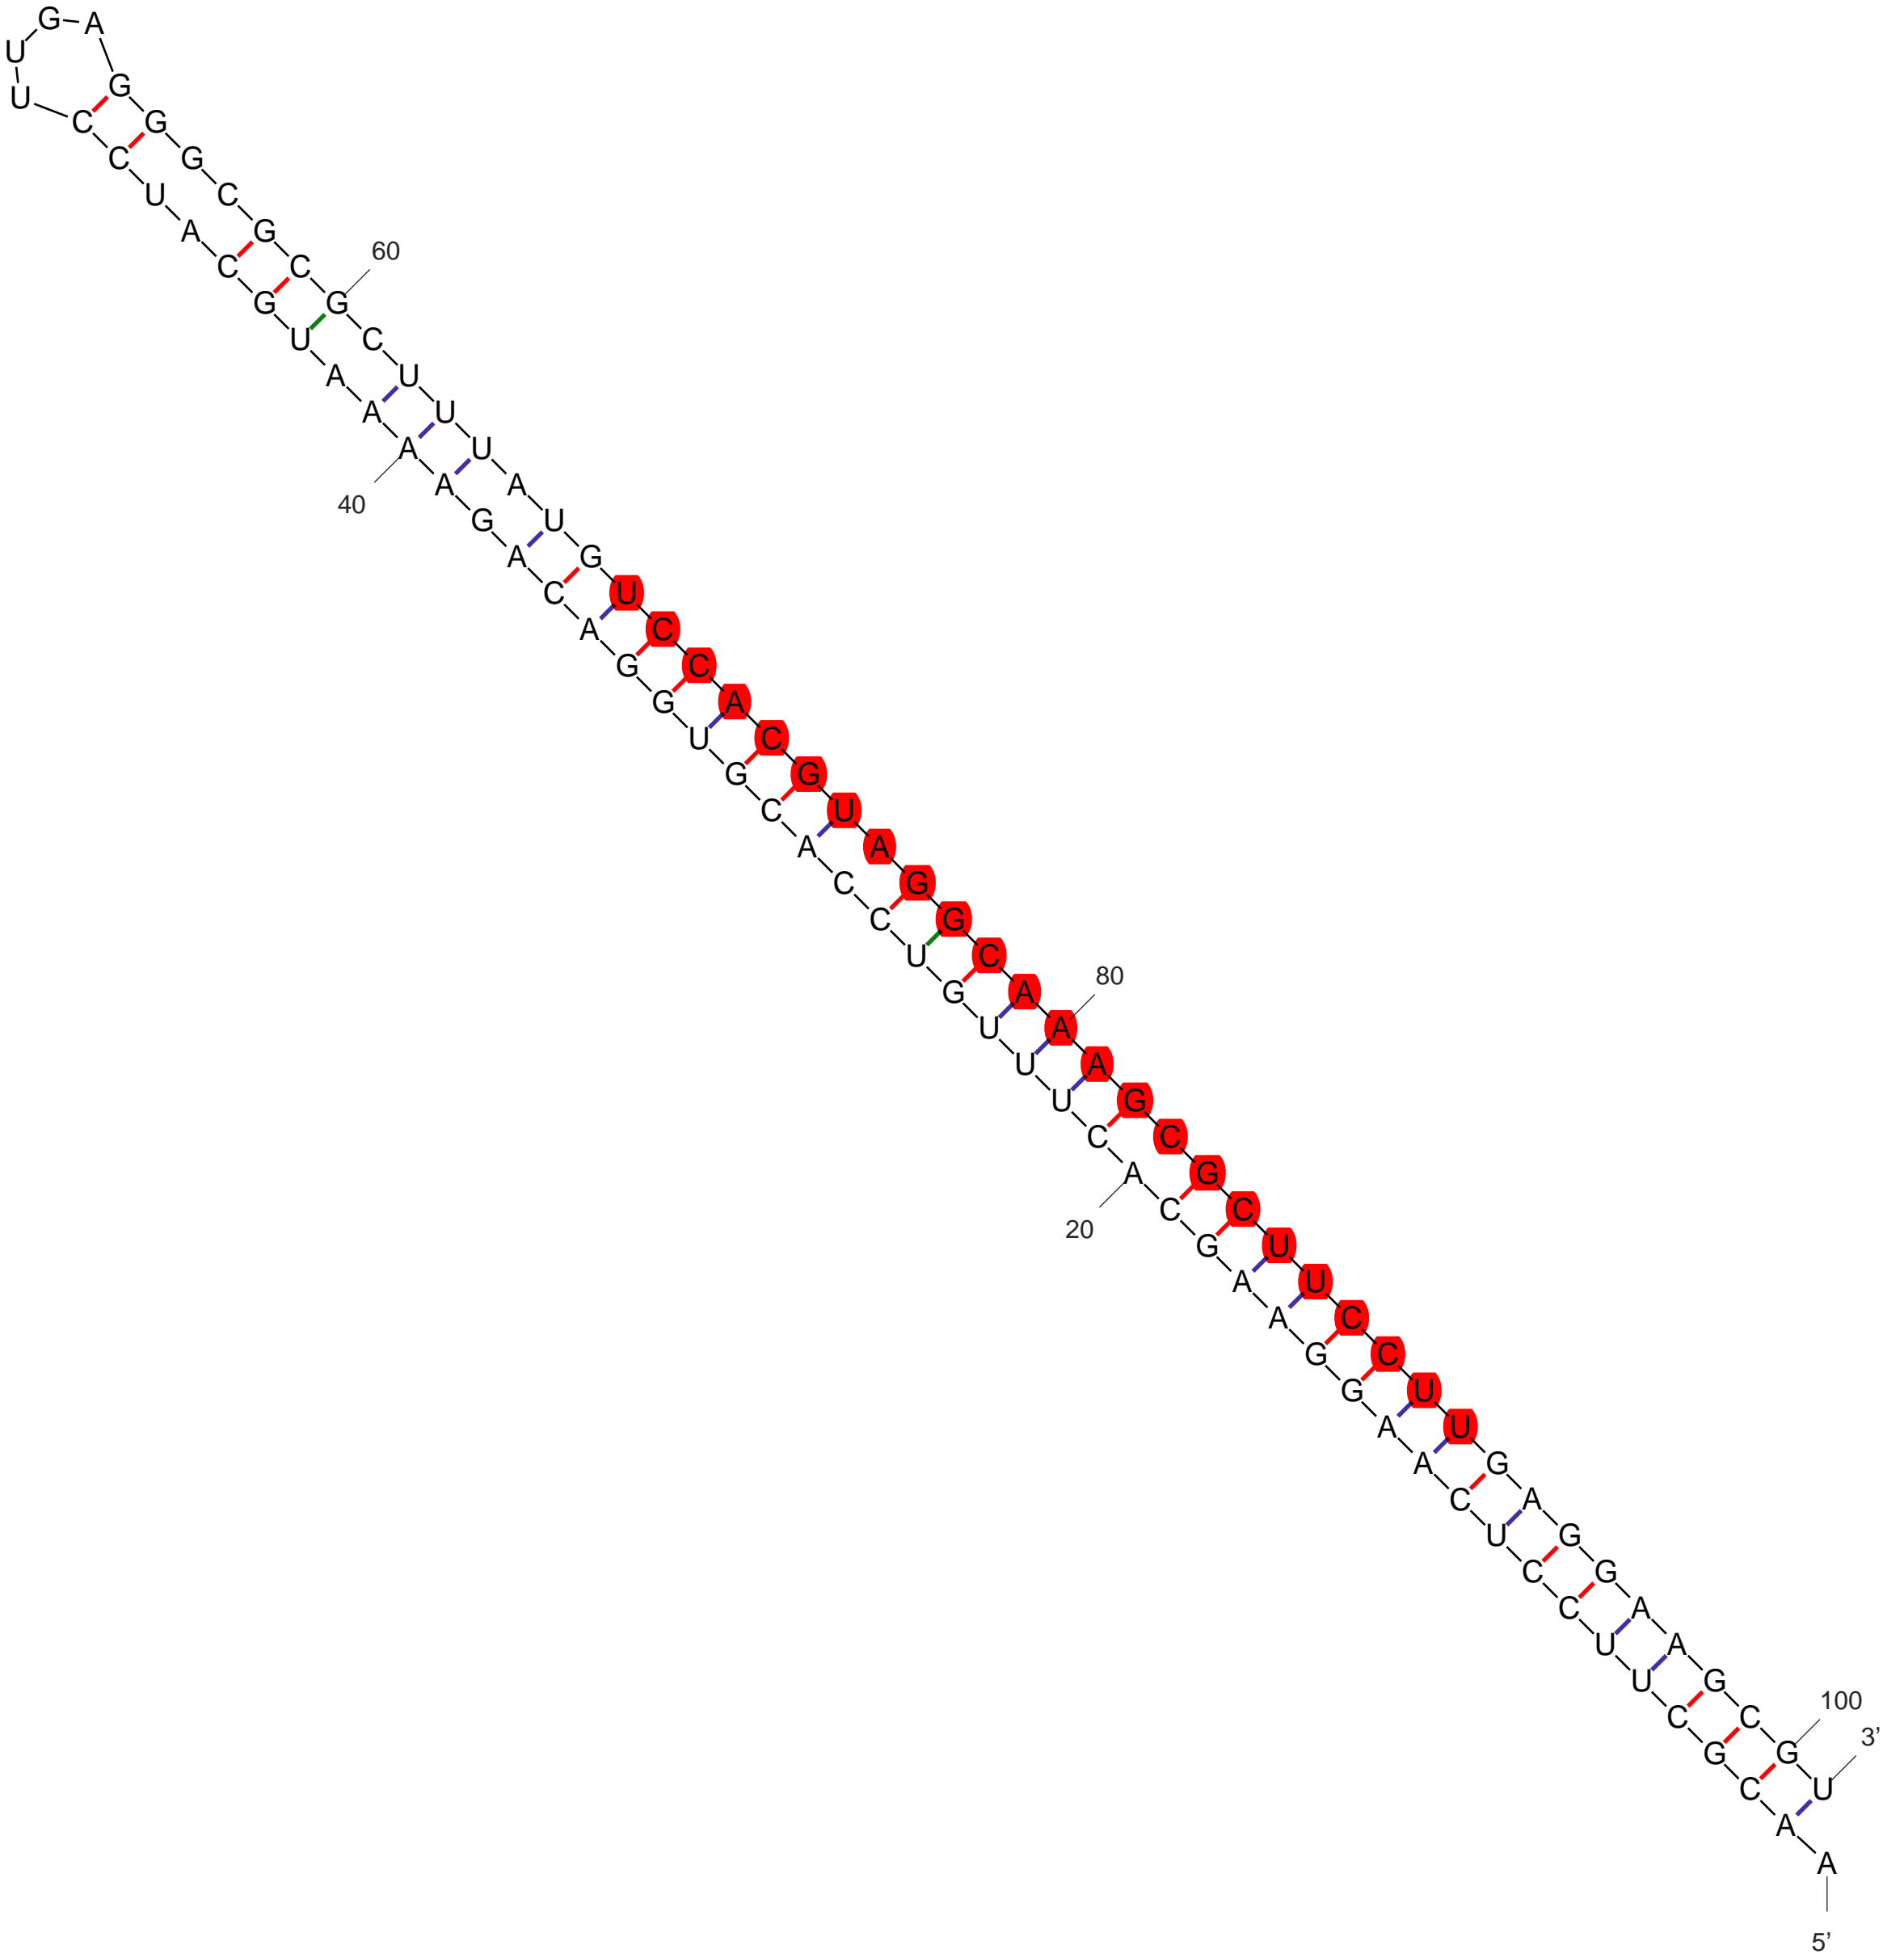

$dG = -69.60$  [Initially -69.60] 157-MIR7486

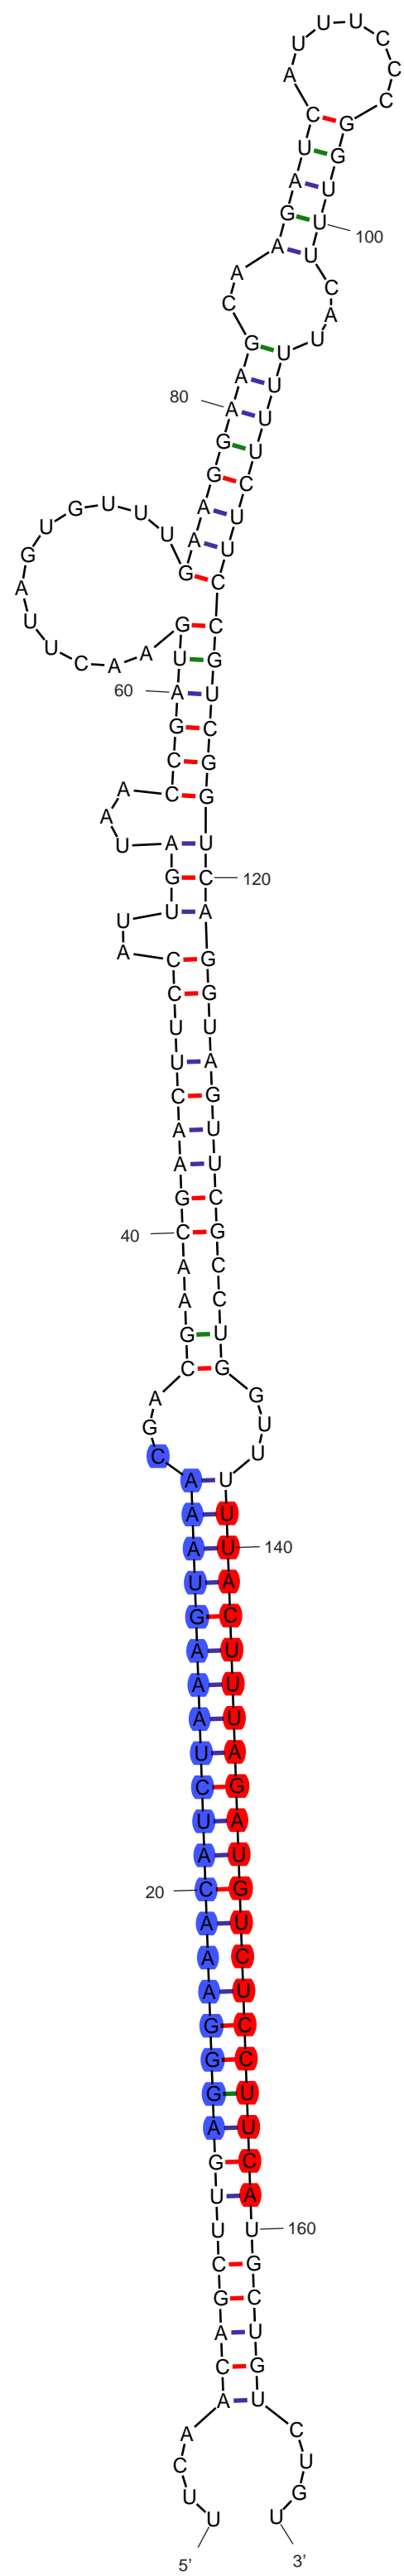

$dG = -60.20$  [Initially  $-60.20$ ] 158-MIR7495

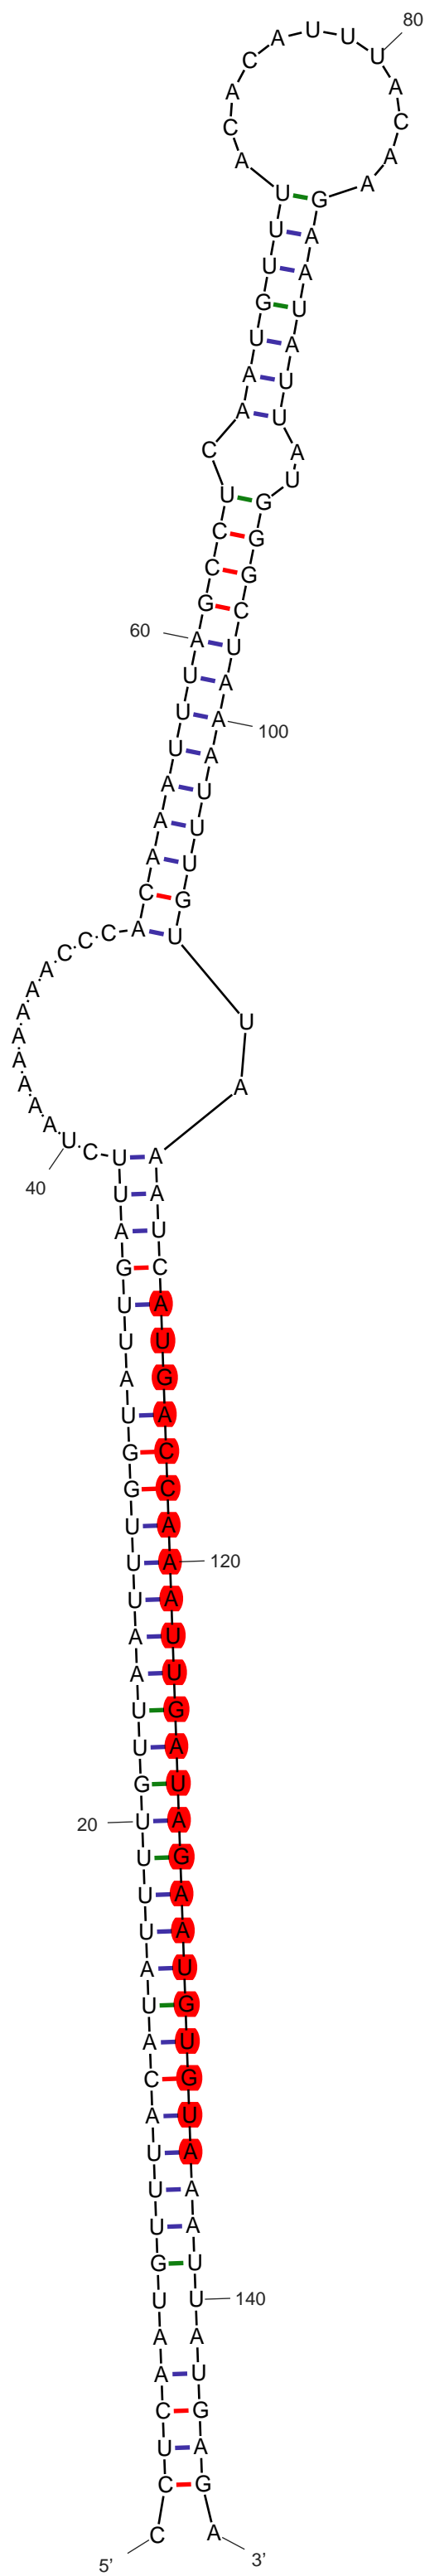

$dG = -50.90$  [Initially -50.90] 159-MIR7496

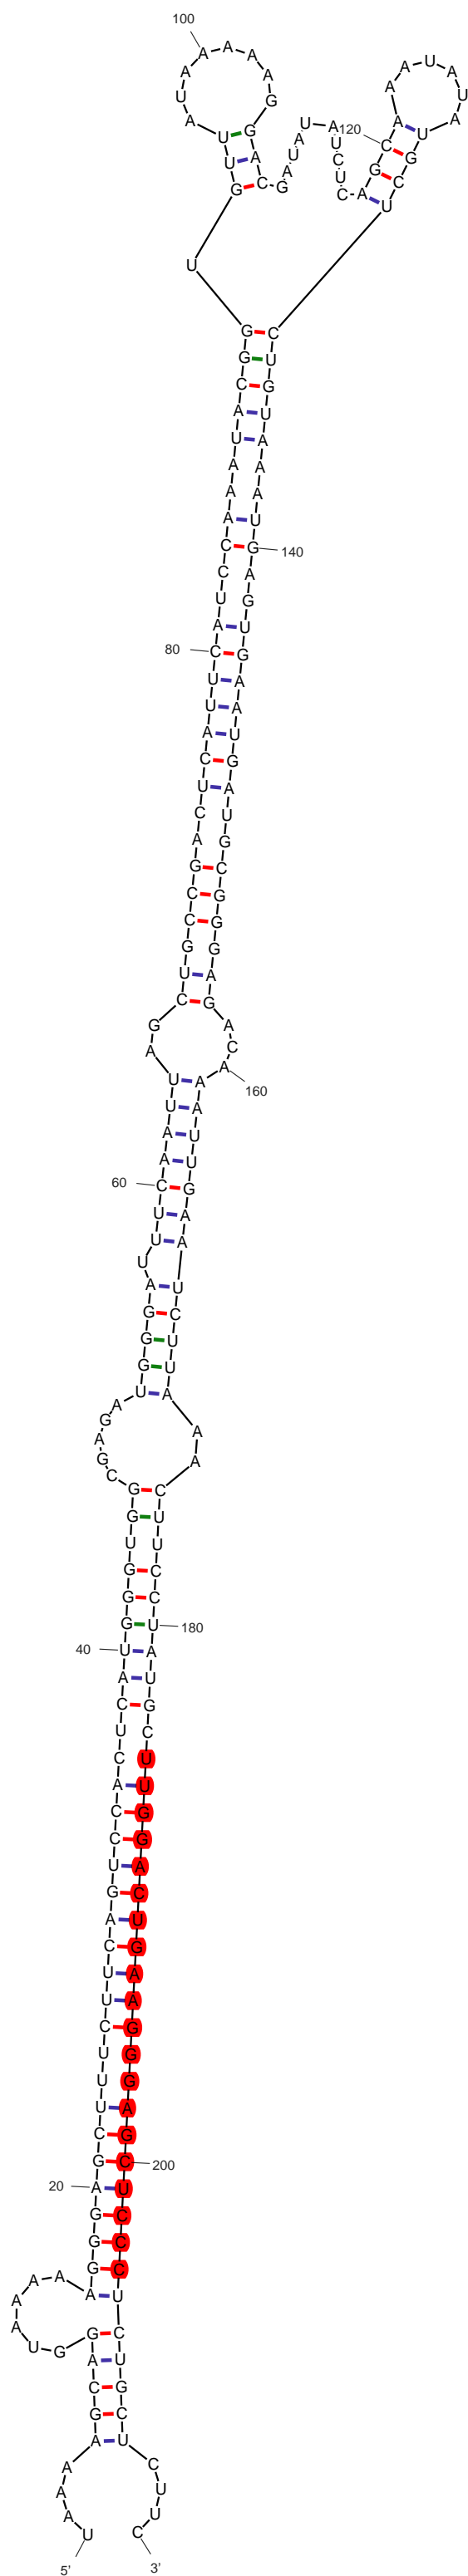

$dG = -82.63$  [Initially  $-84.60$ ] 15-MIR159-[ctr-MIR319 MI0013303]

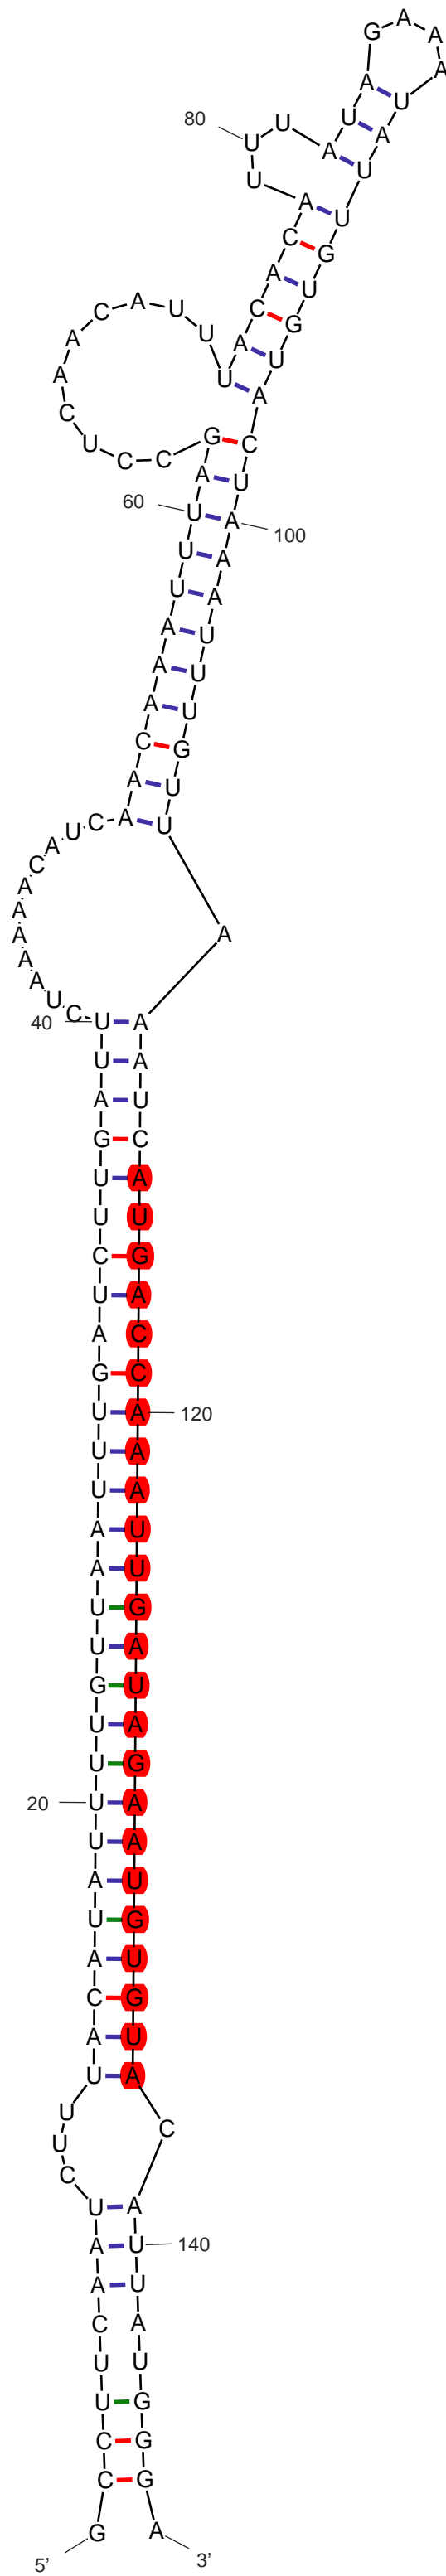

***dG = -38.30 [Initially -38.30] 160-MIR7496***



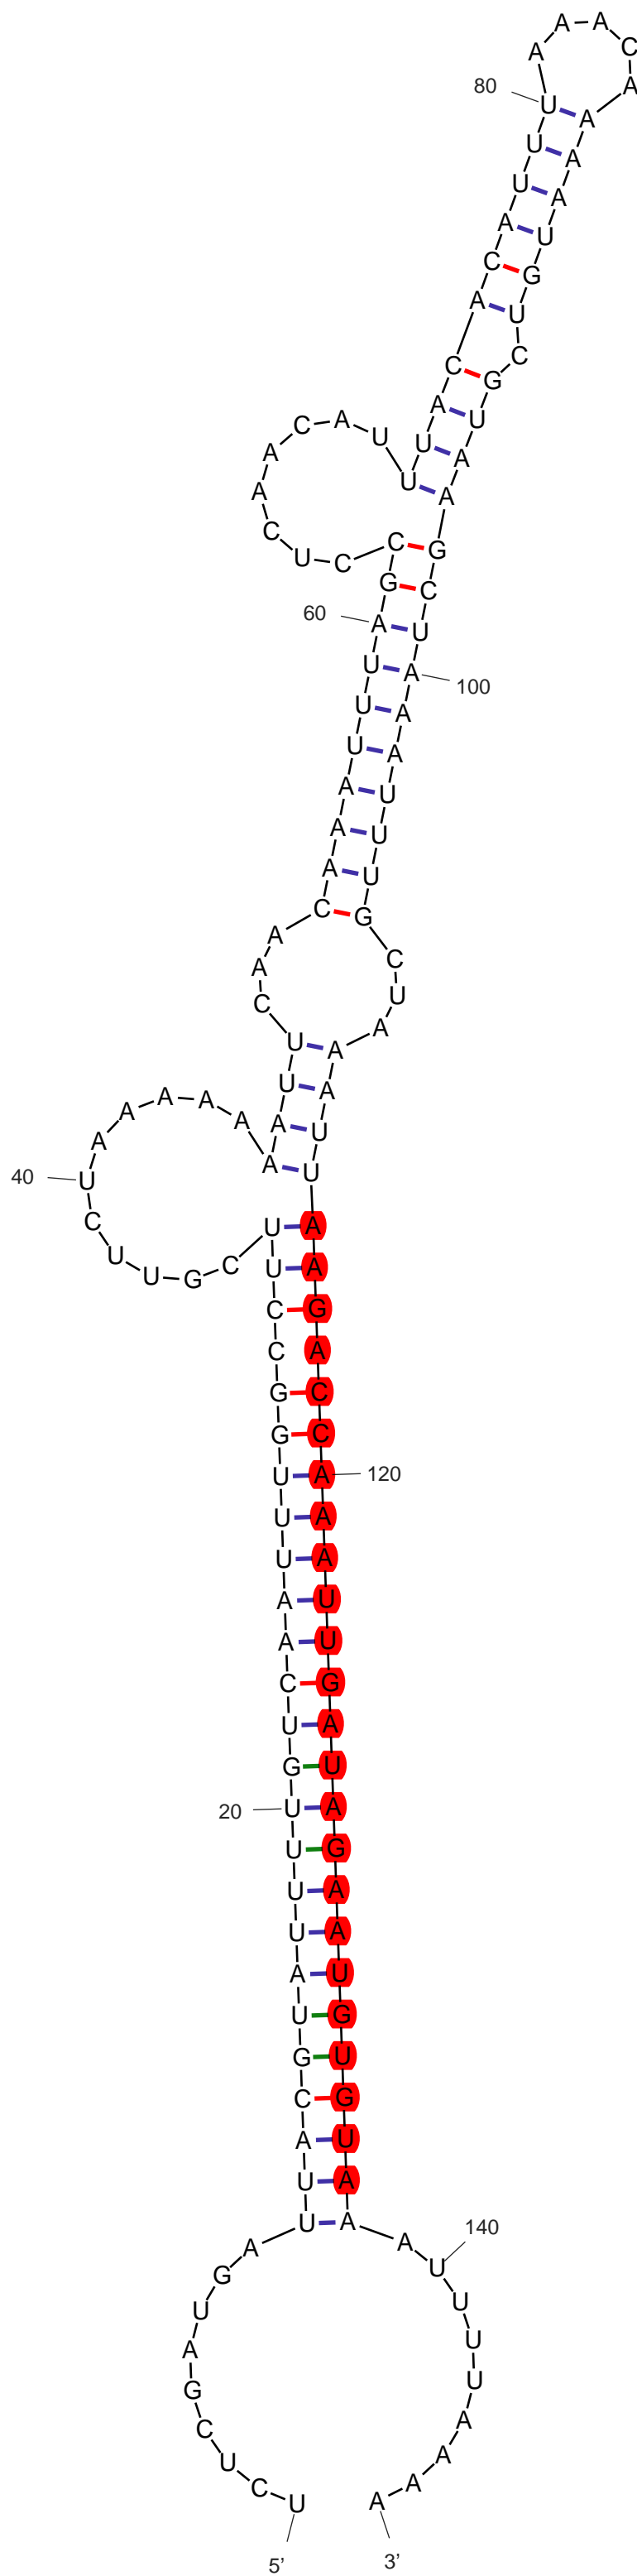

$dG = -36.10$  [Initially  $-36.10$ ] 161-MIR7496

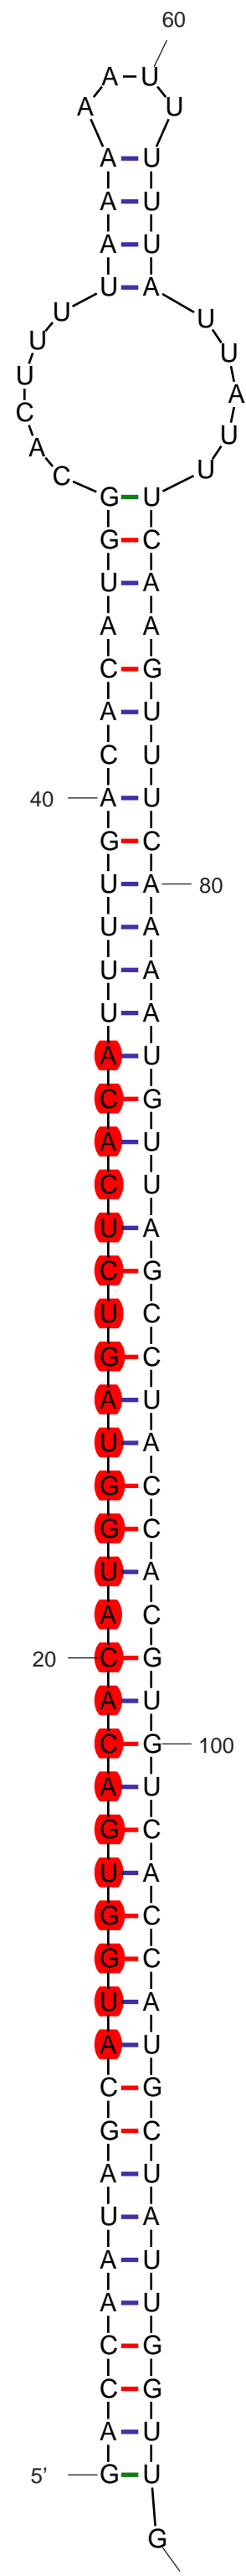

$dG = -59.20$  [Initially -59.20] 163-MIR7498

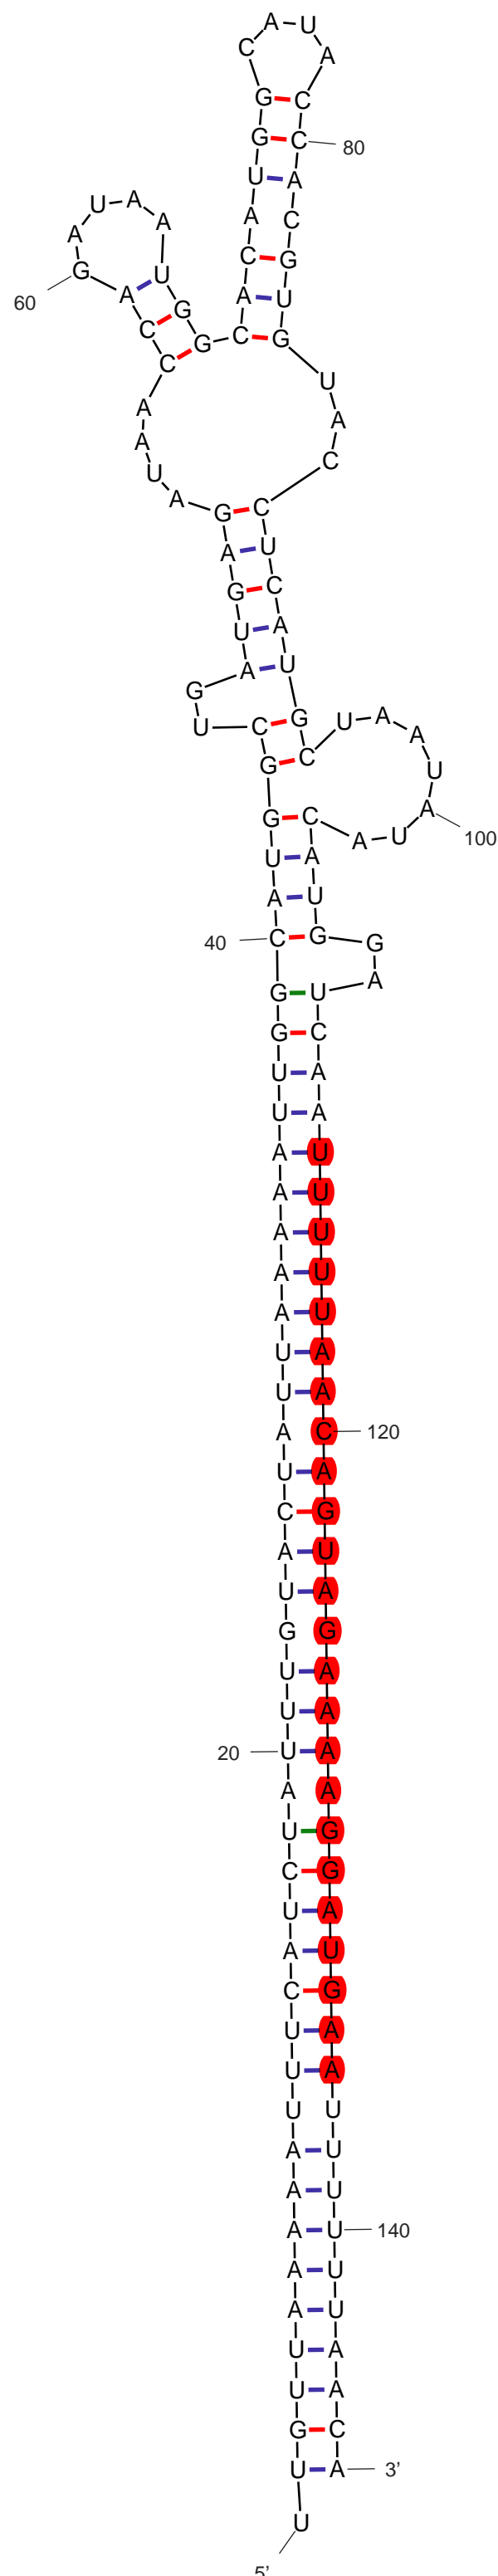

$dG = -42.93$  [Initially  $-43.50$ ] 164-MIR7502

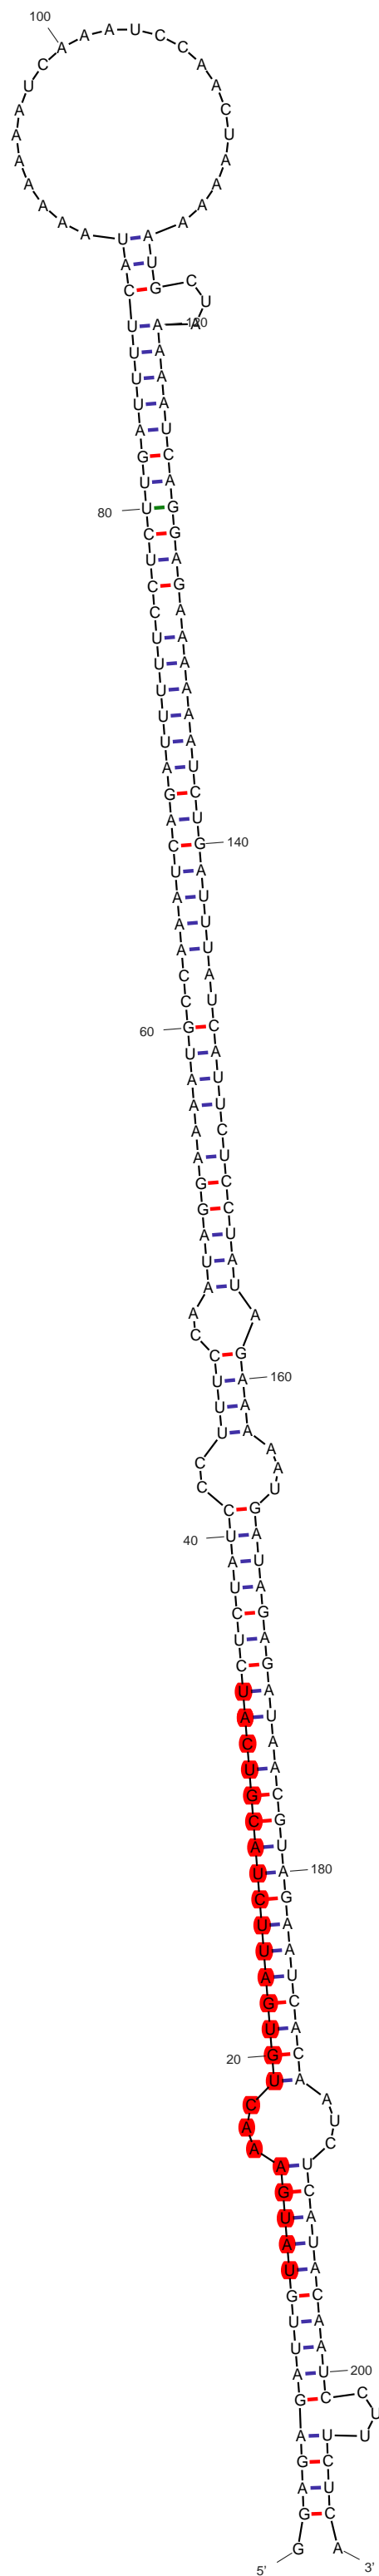

$dG = -86.30$  [Initially  $-86.30$ ] 165-MIR7504a

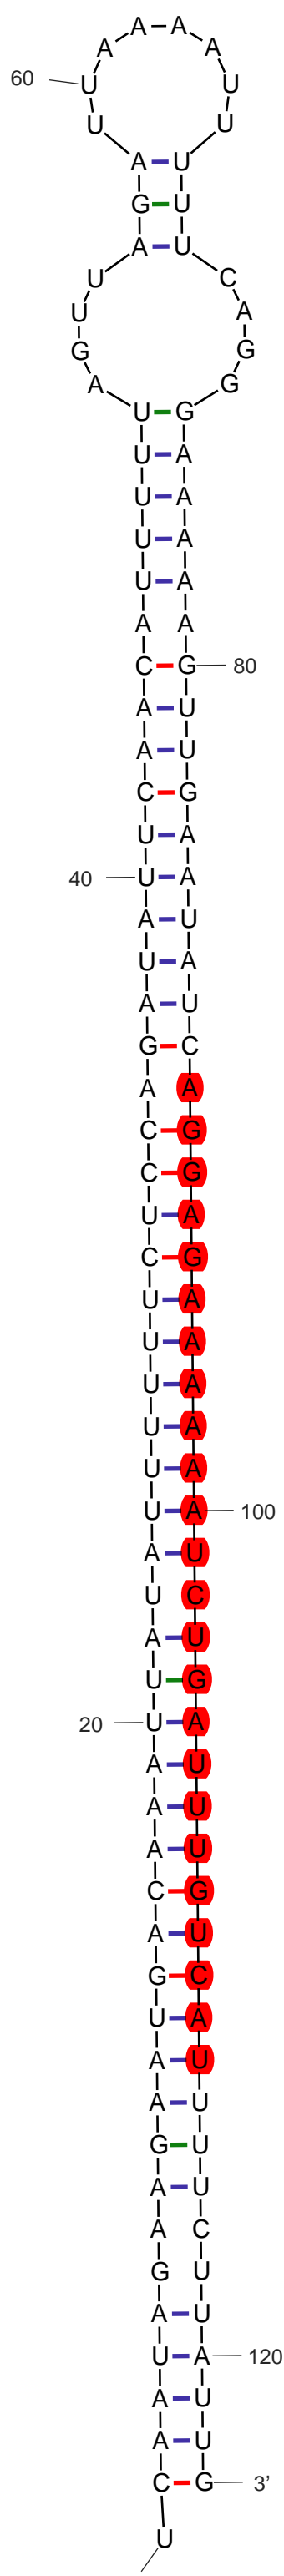

$dG = -47.60$  [Initially  $-47.60$ ] 166-MIR7504b

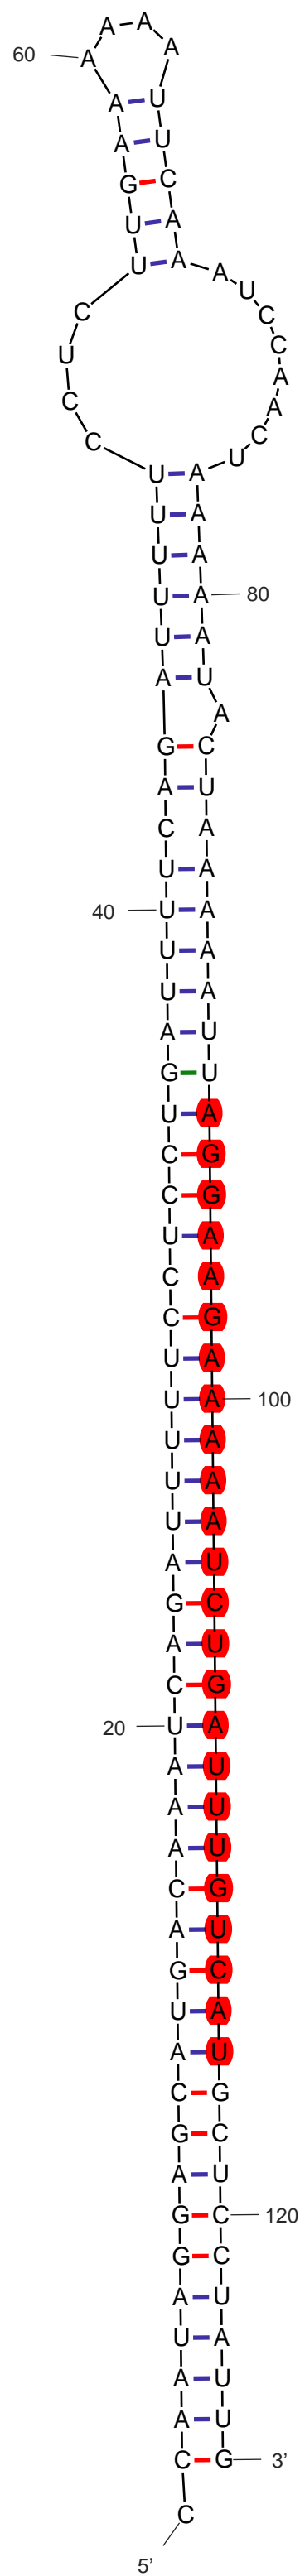

$dG = -61.40$  [Initially  $-61.40$ ] 167-MIR75047b

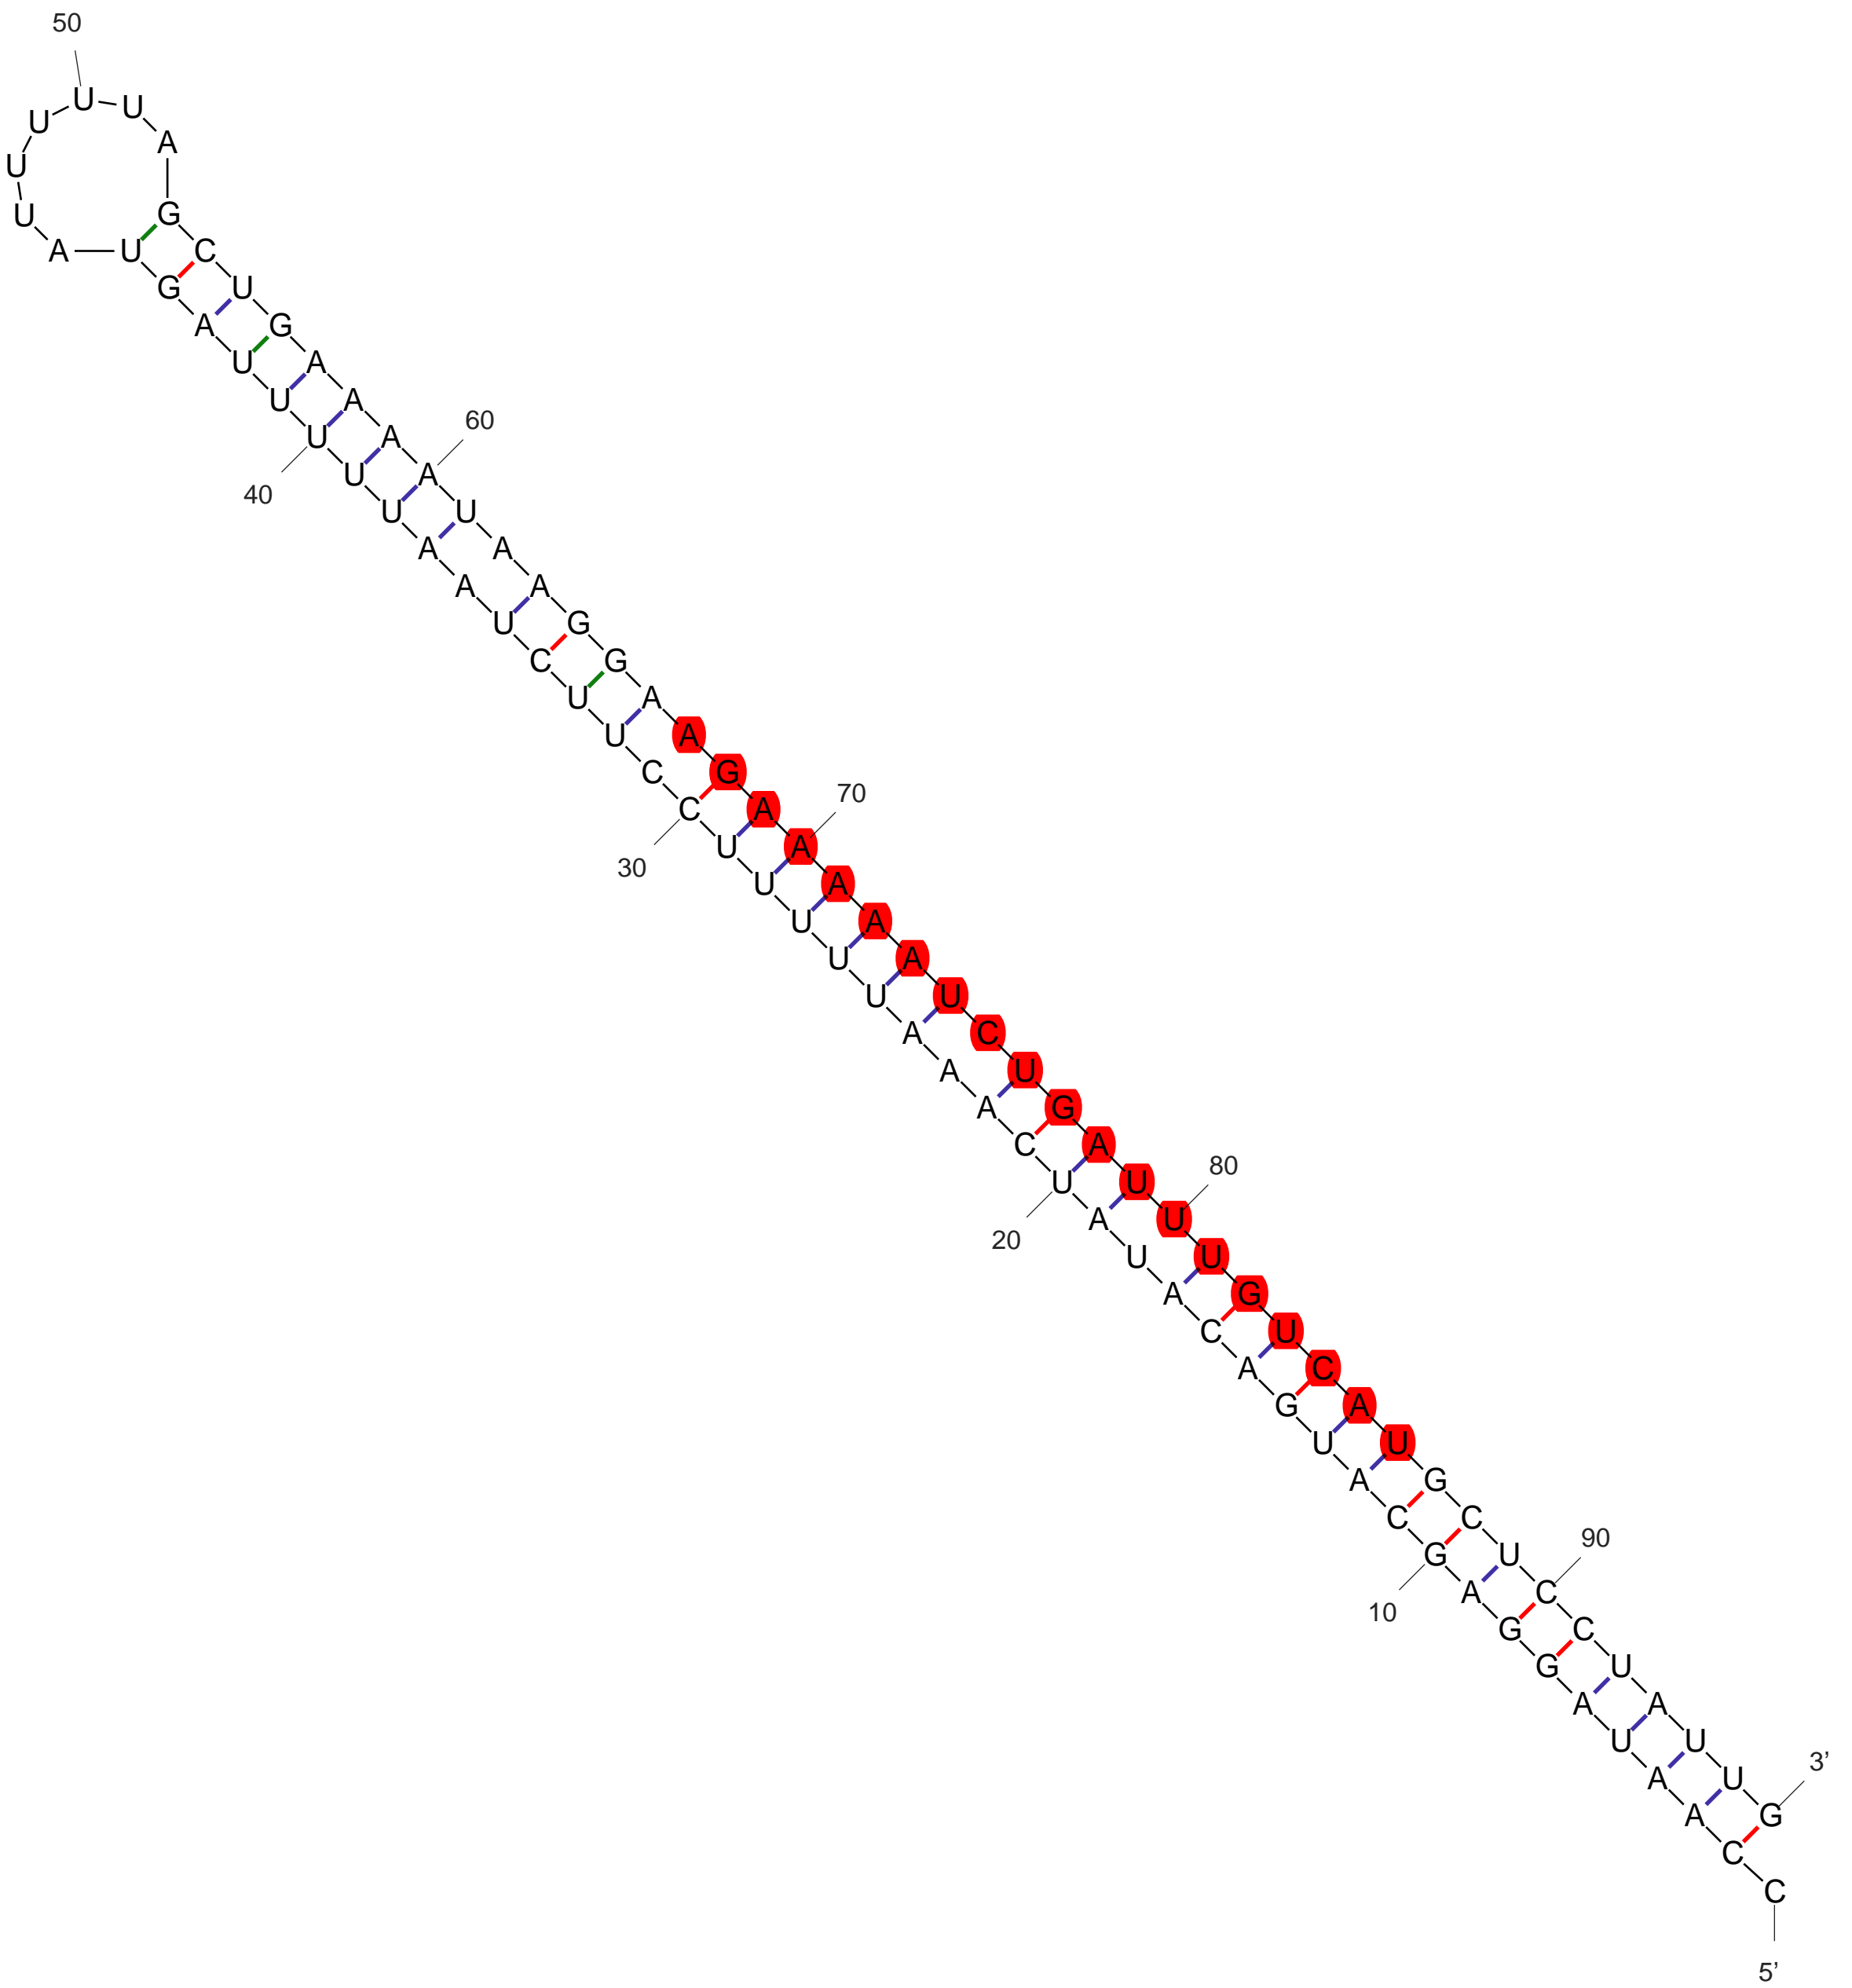

$dG = -47.90$  [Initially  $-47.90$ ] 168-MIR7504b

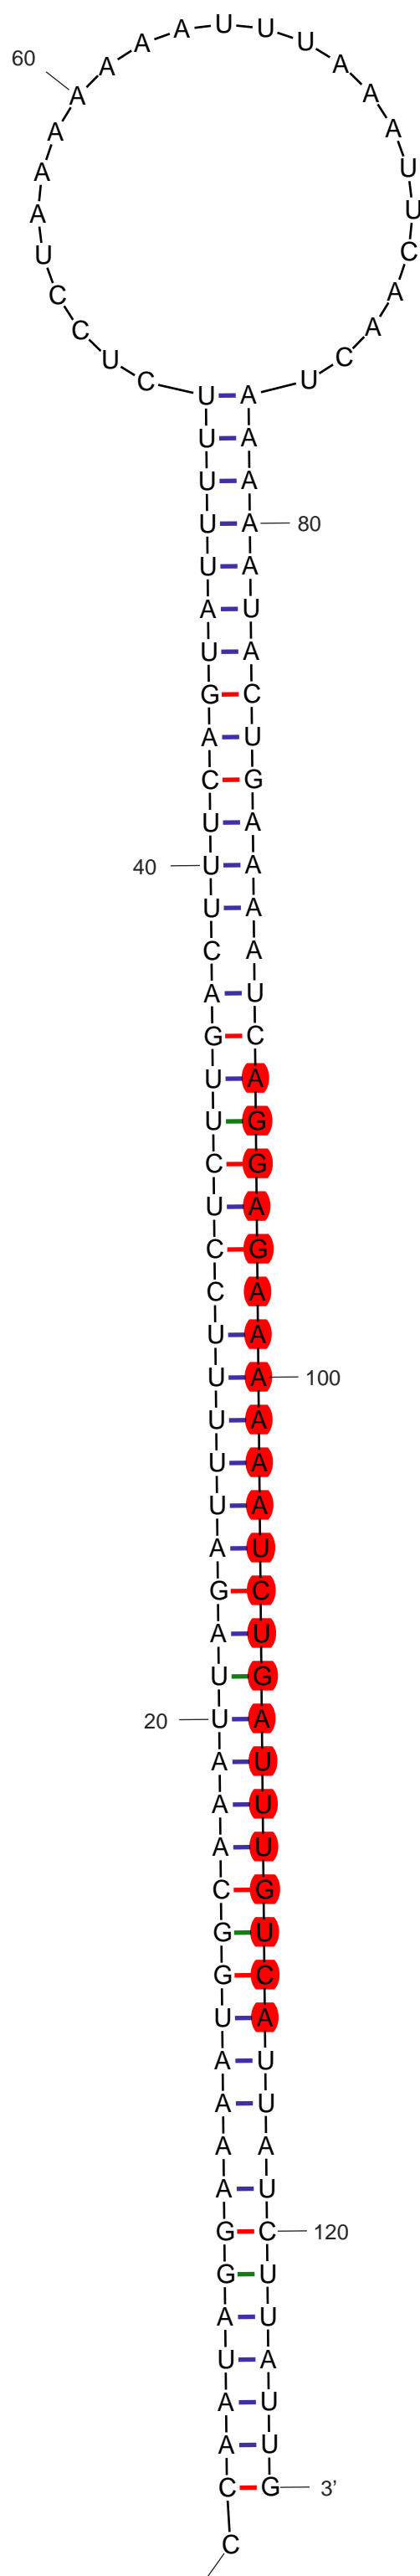

$dG = -51.70$  [Initially  $-51.70$ ] 169-MIR7504b





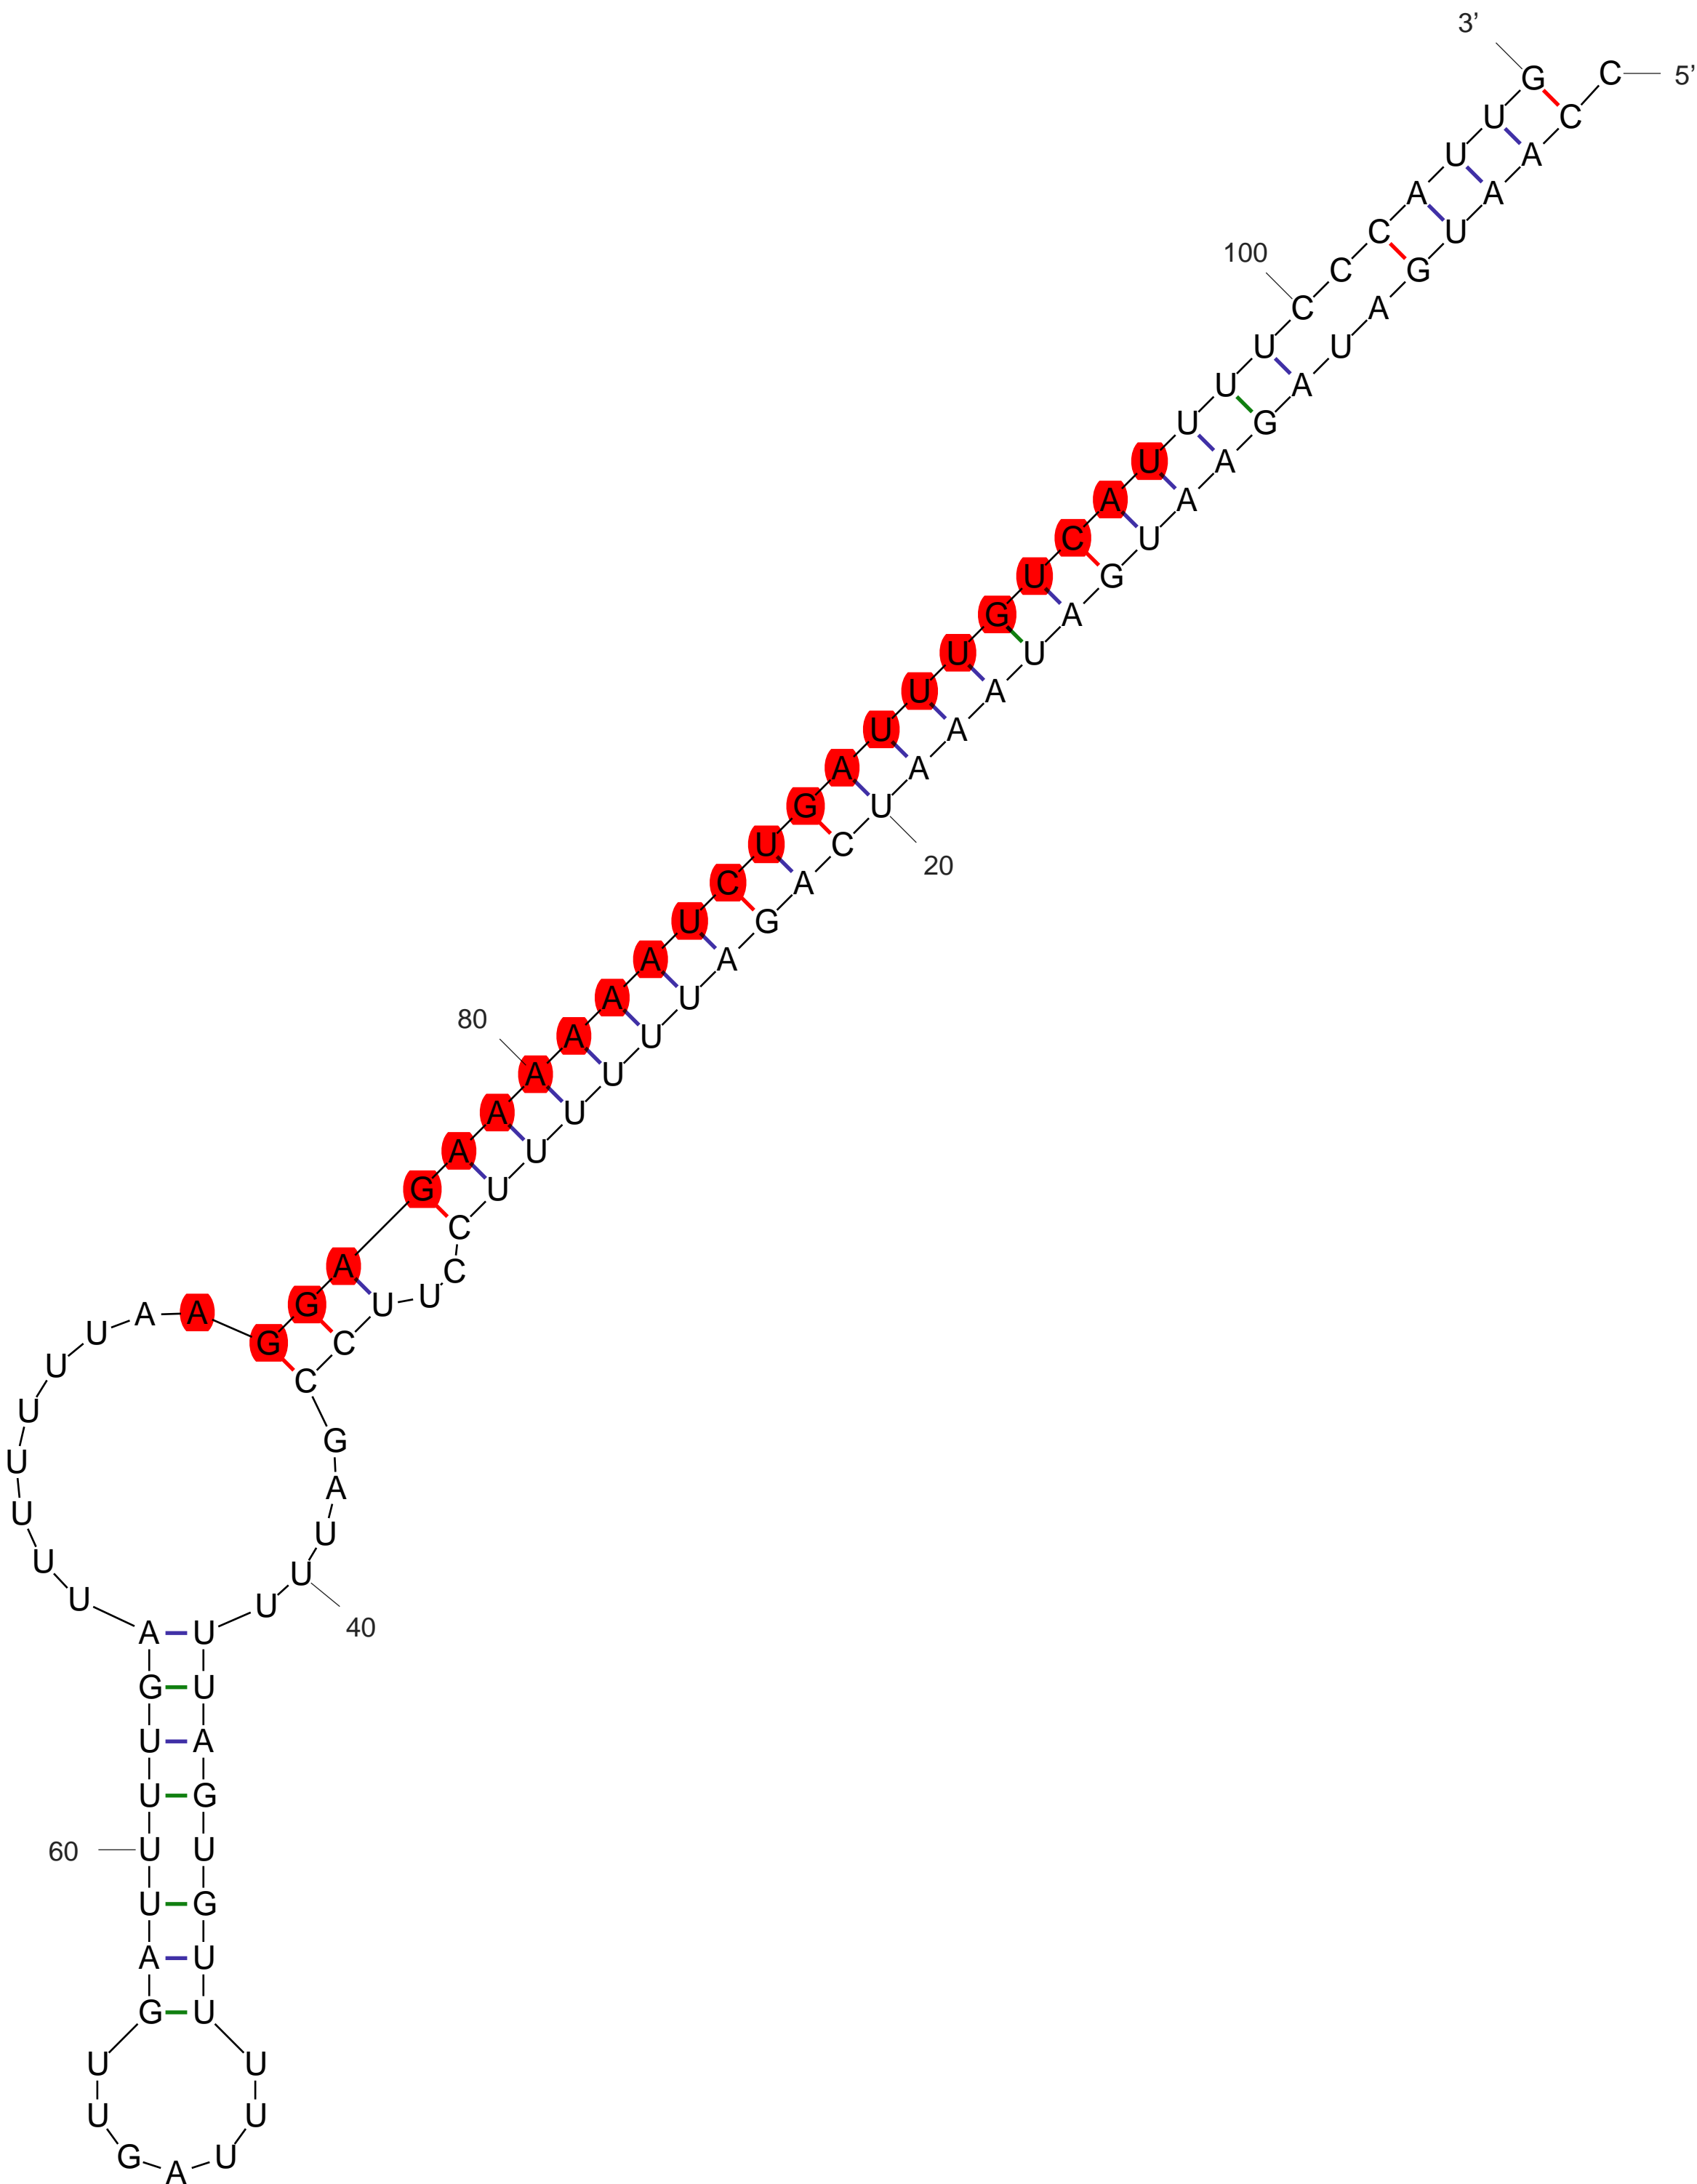

dG = -33.10 [Initially -33.10] 170-MIR7504b



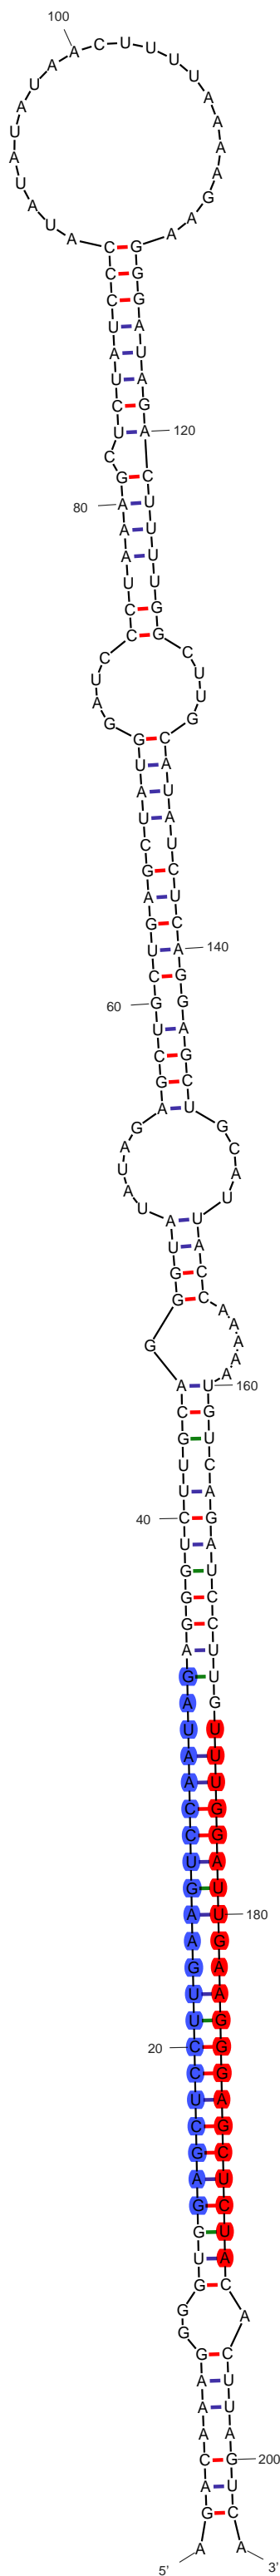

$dG = -87.80$  [Initially -87.80] 17-MIR159-[hbr-MIR159a MI0022053]

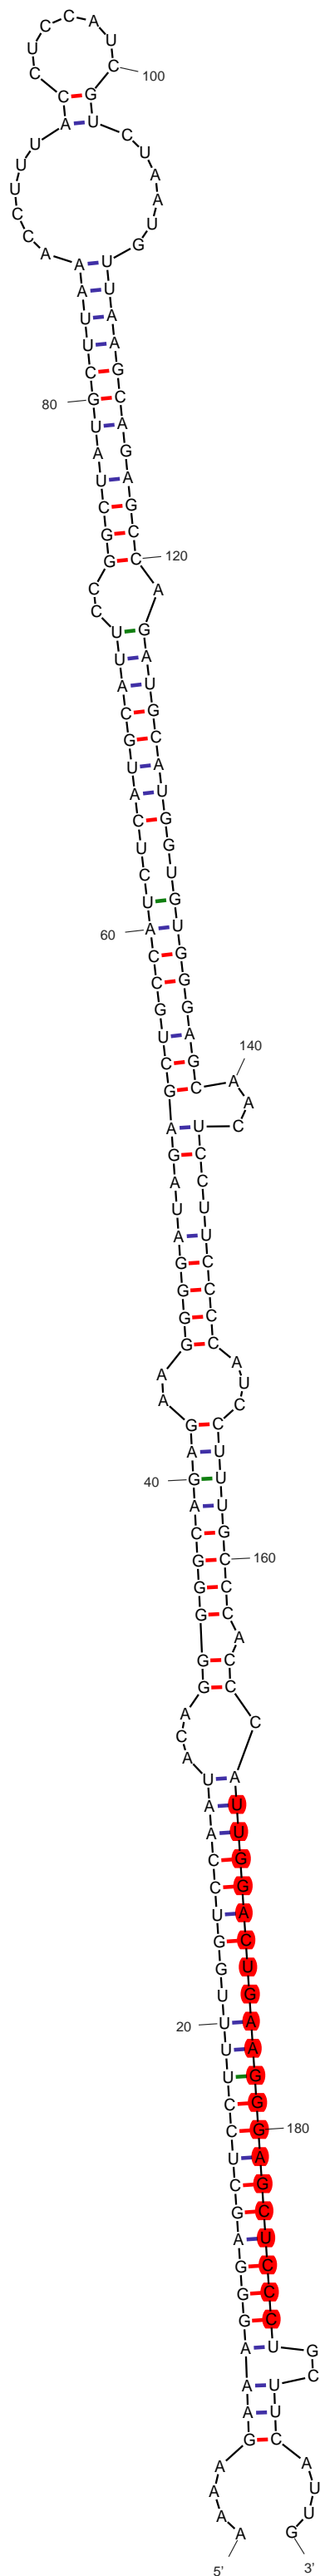

**$dG = -104.20$  [Initially  $-104.20$ ] 18-MIR159**

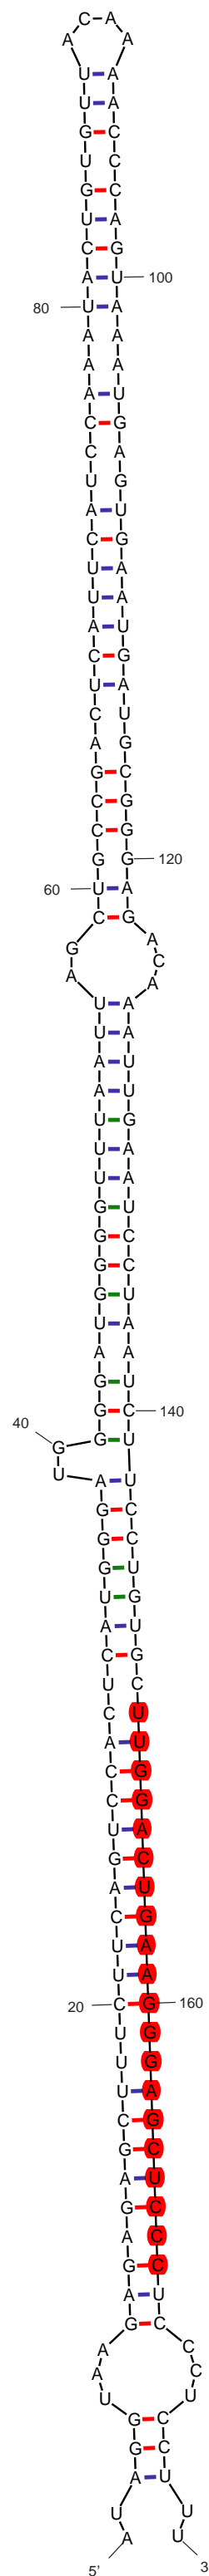

$dG = -85.70$  [Initially -85.70] 19-MIR159-[vvi-MIR319c MI0006549]

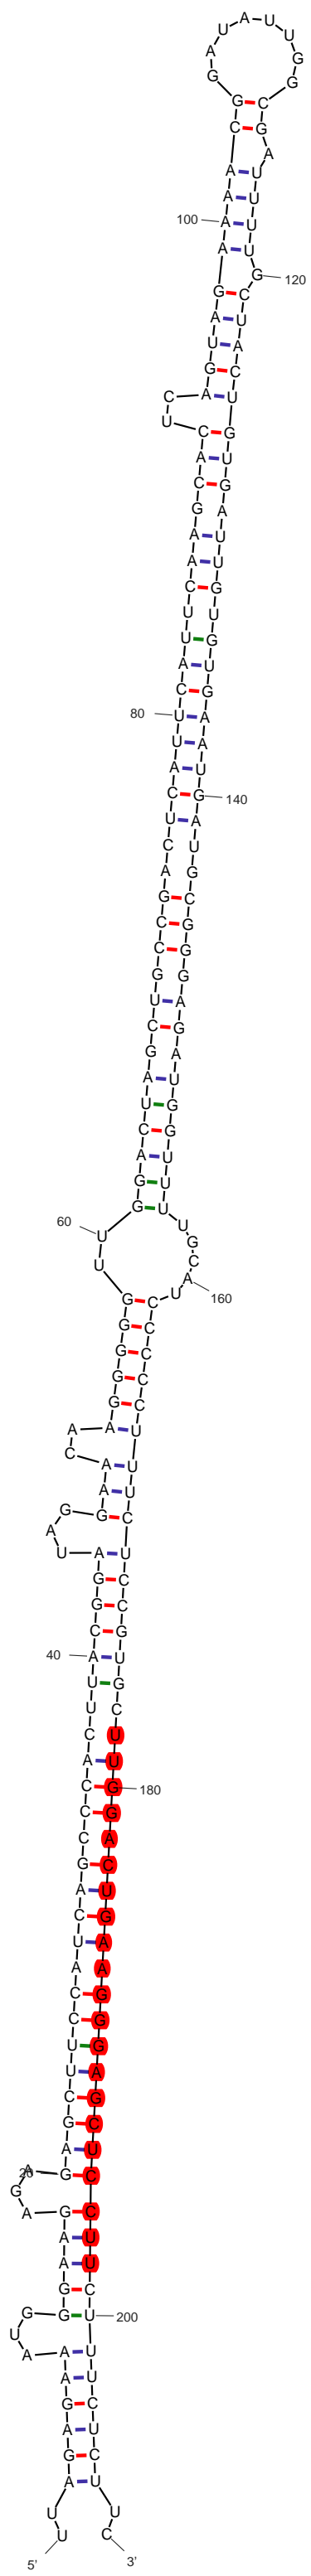

$dG = -86.80$  [Initially  $-86.80$ ] 20-MIR159-[ptc-MIR319f MI0002301]

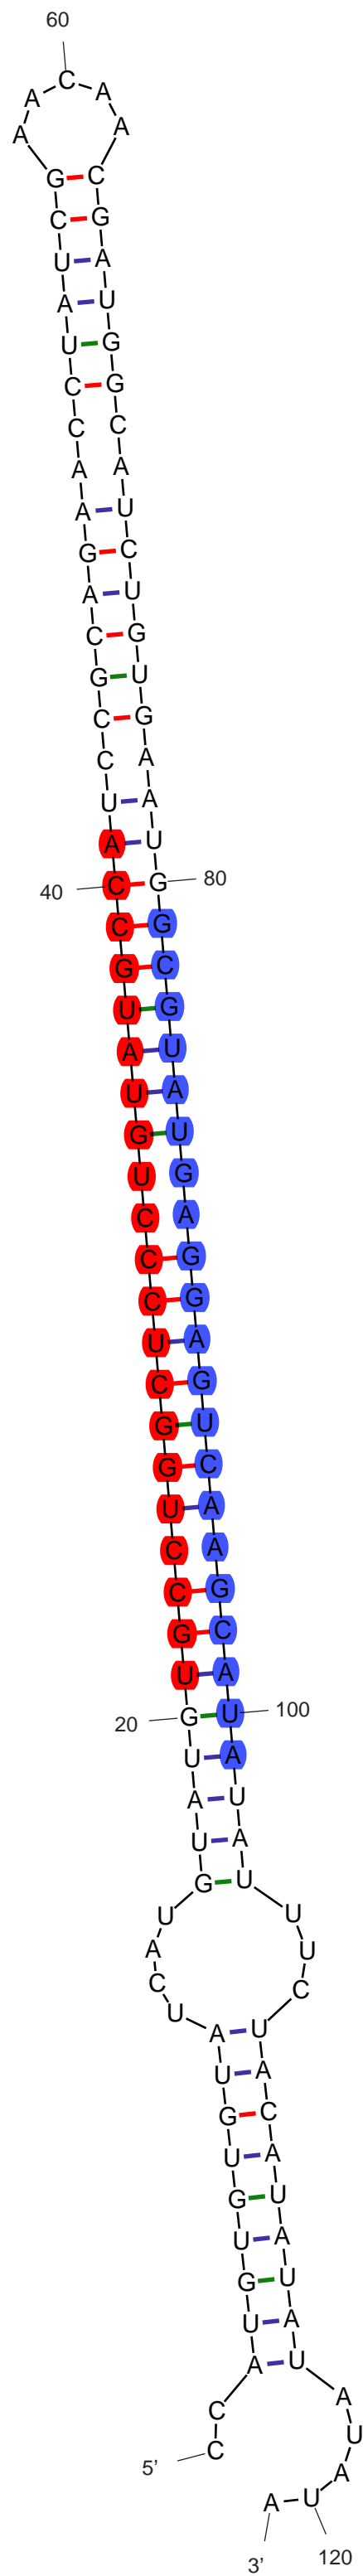

$dG = -59.50$  [Initially -59.50] 21-MIR160-[mdm-MIR160c MI0023006]



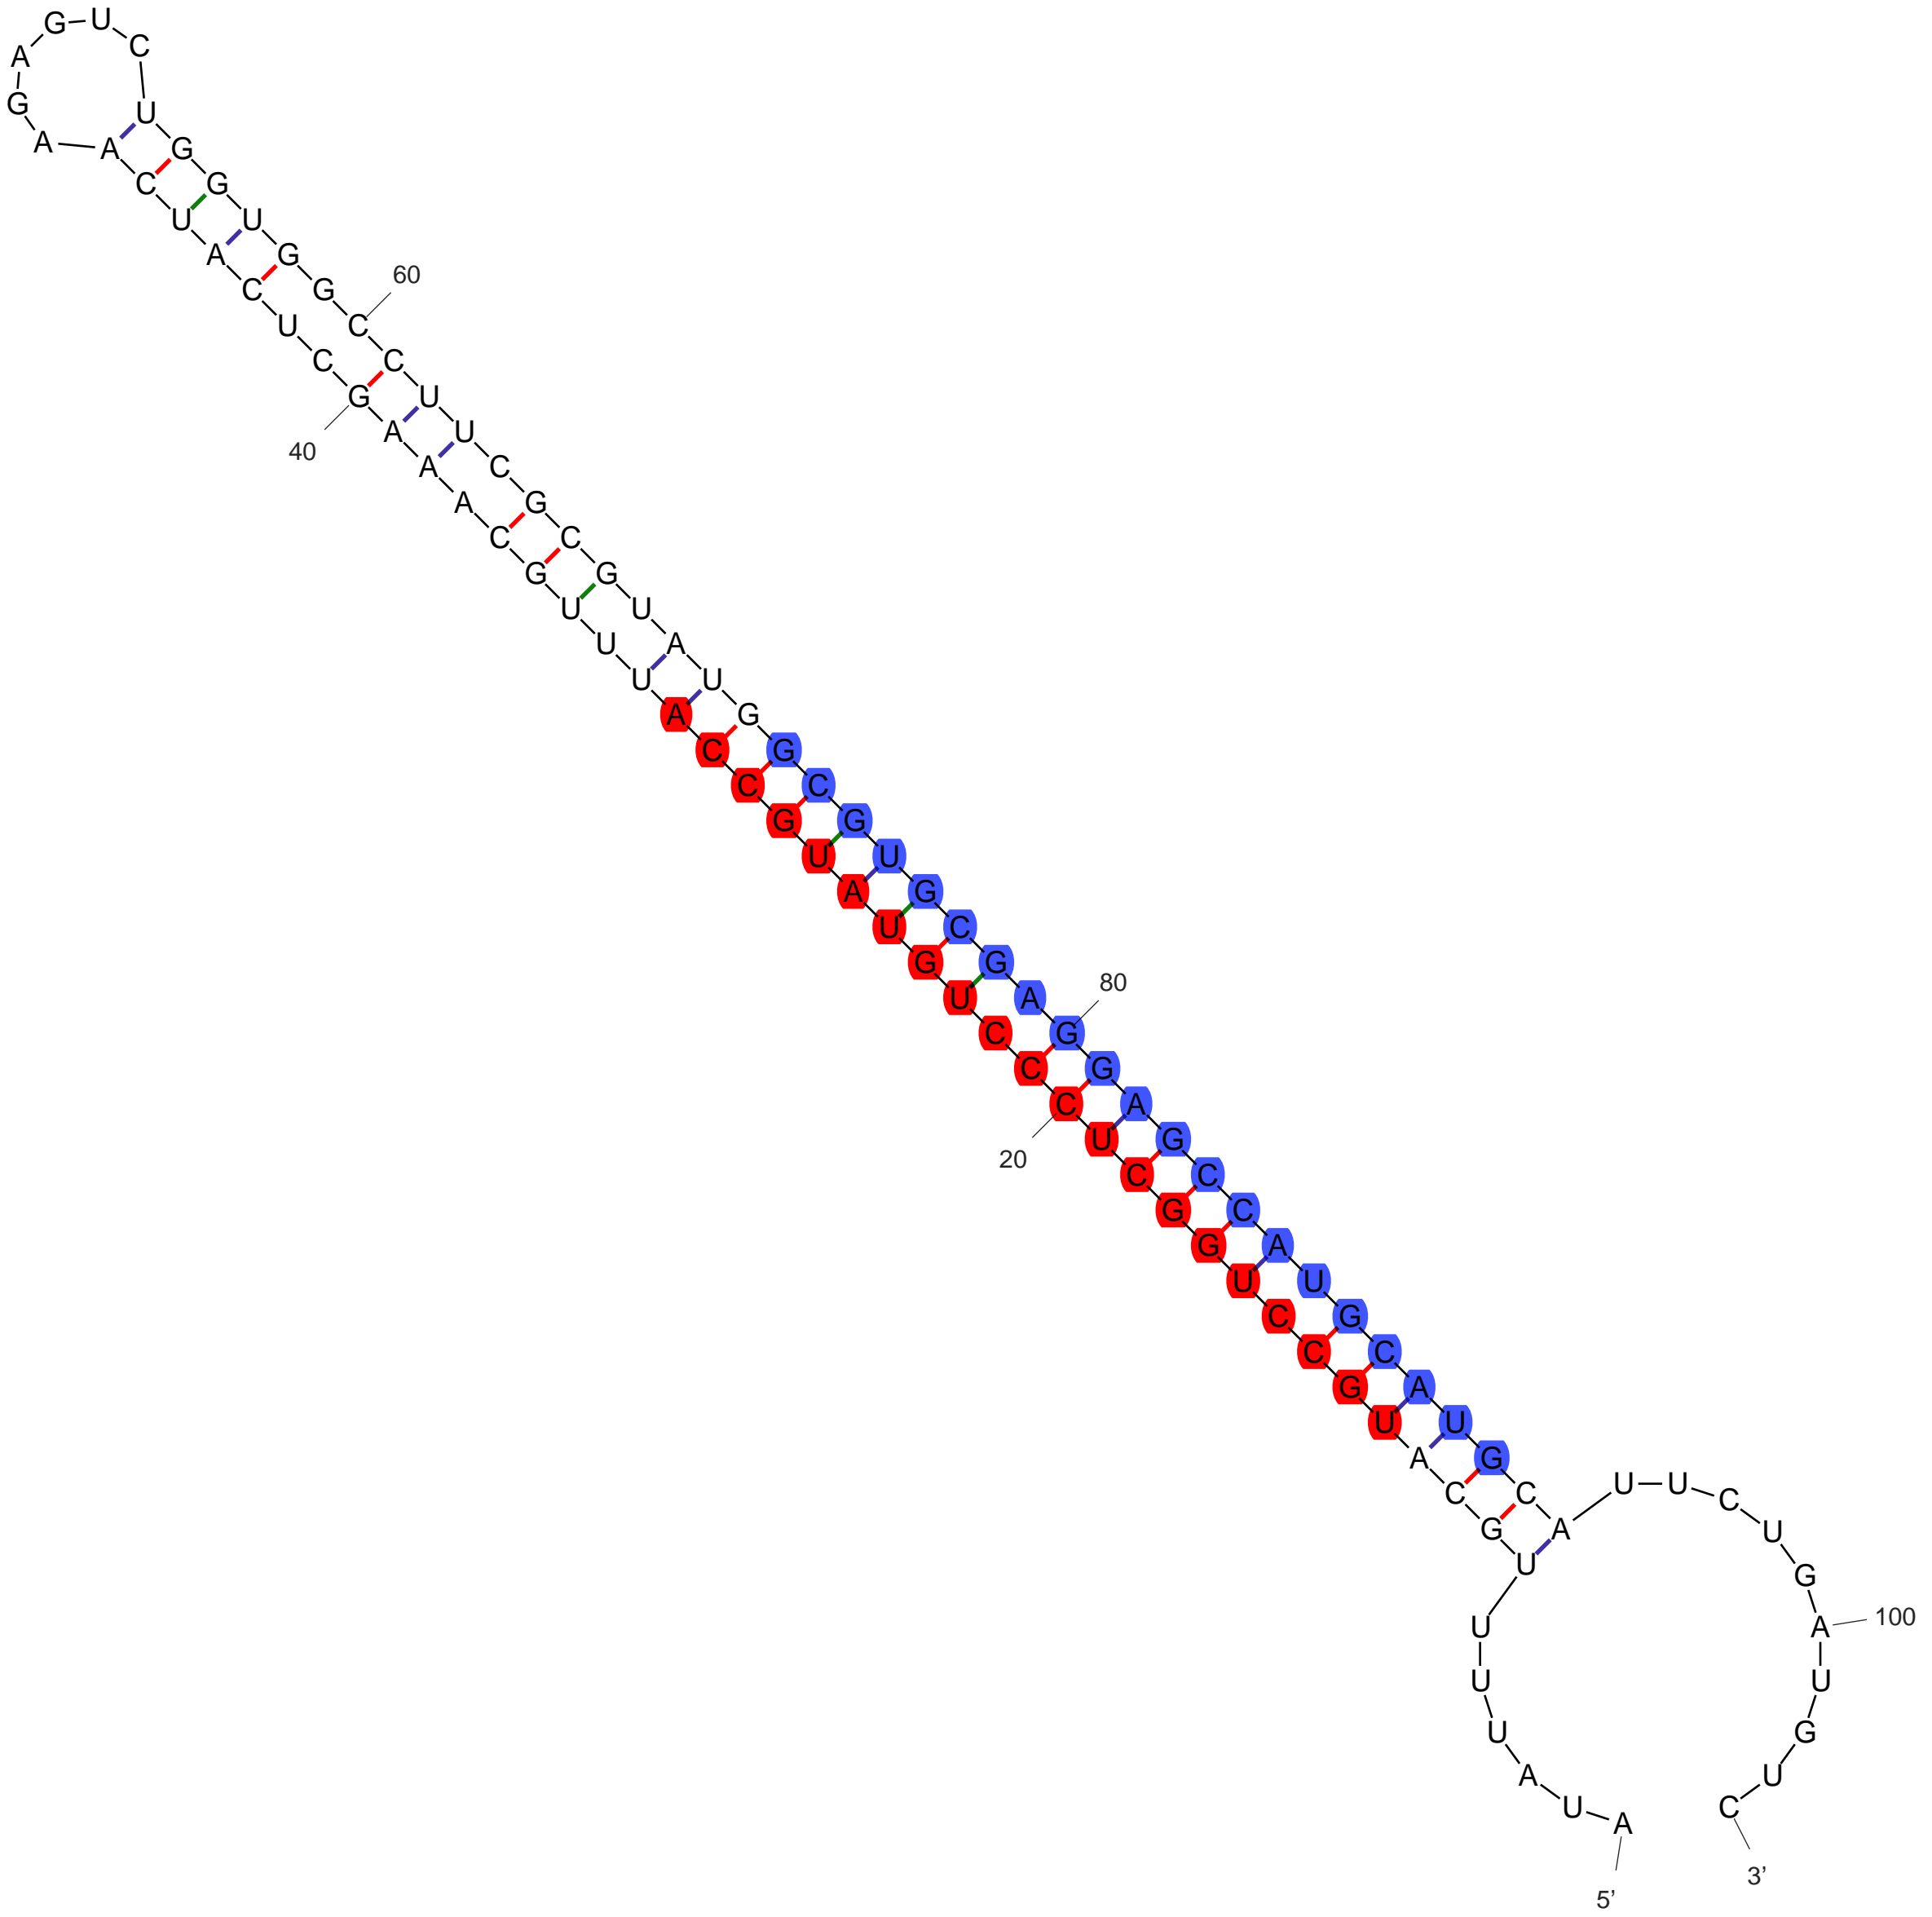

$dG = -54.20$  [Initially -54.20] 22-MIR160-[tcc-MIR160b MI0017461]

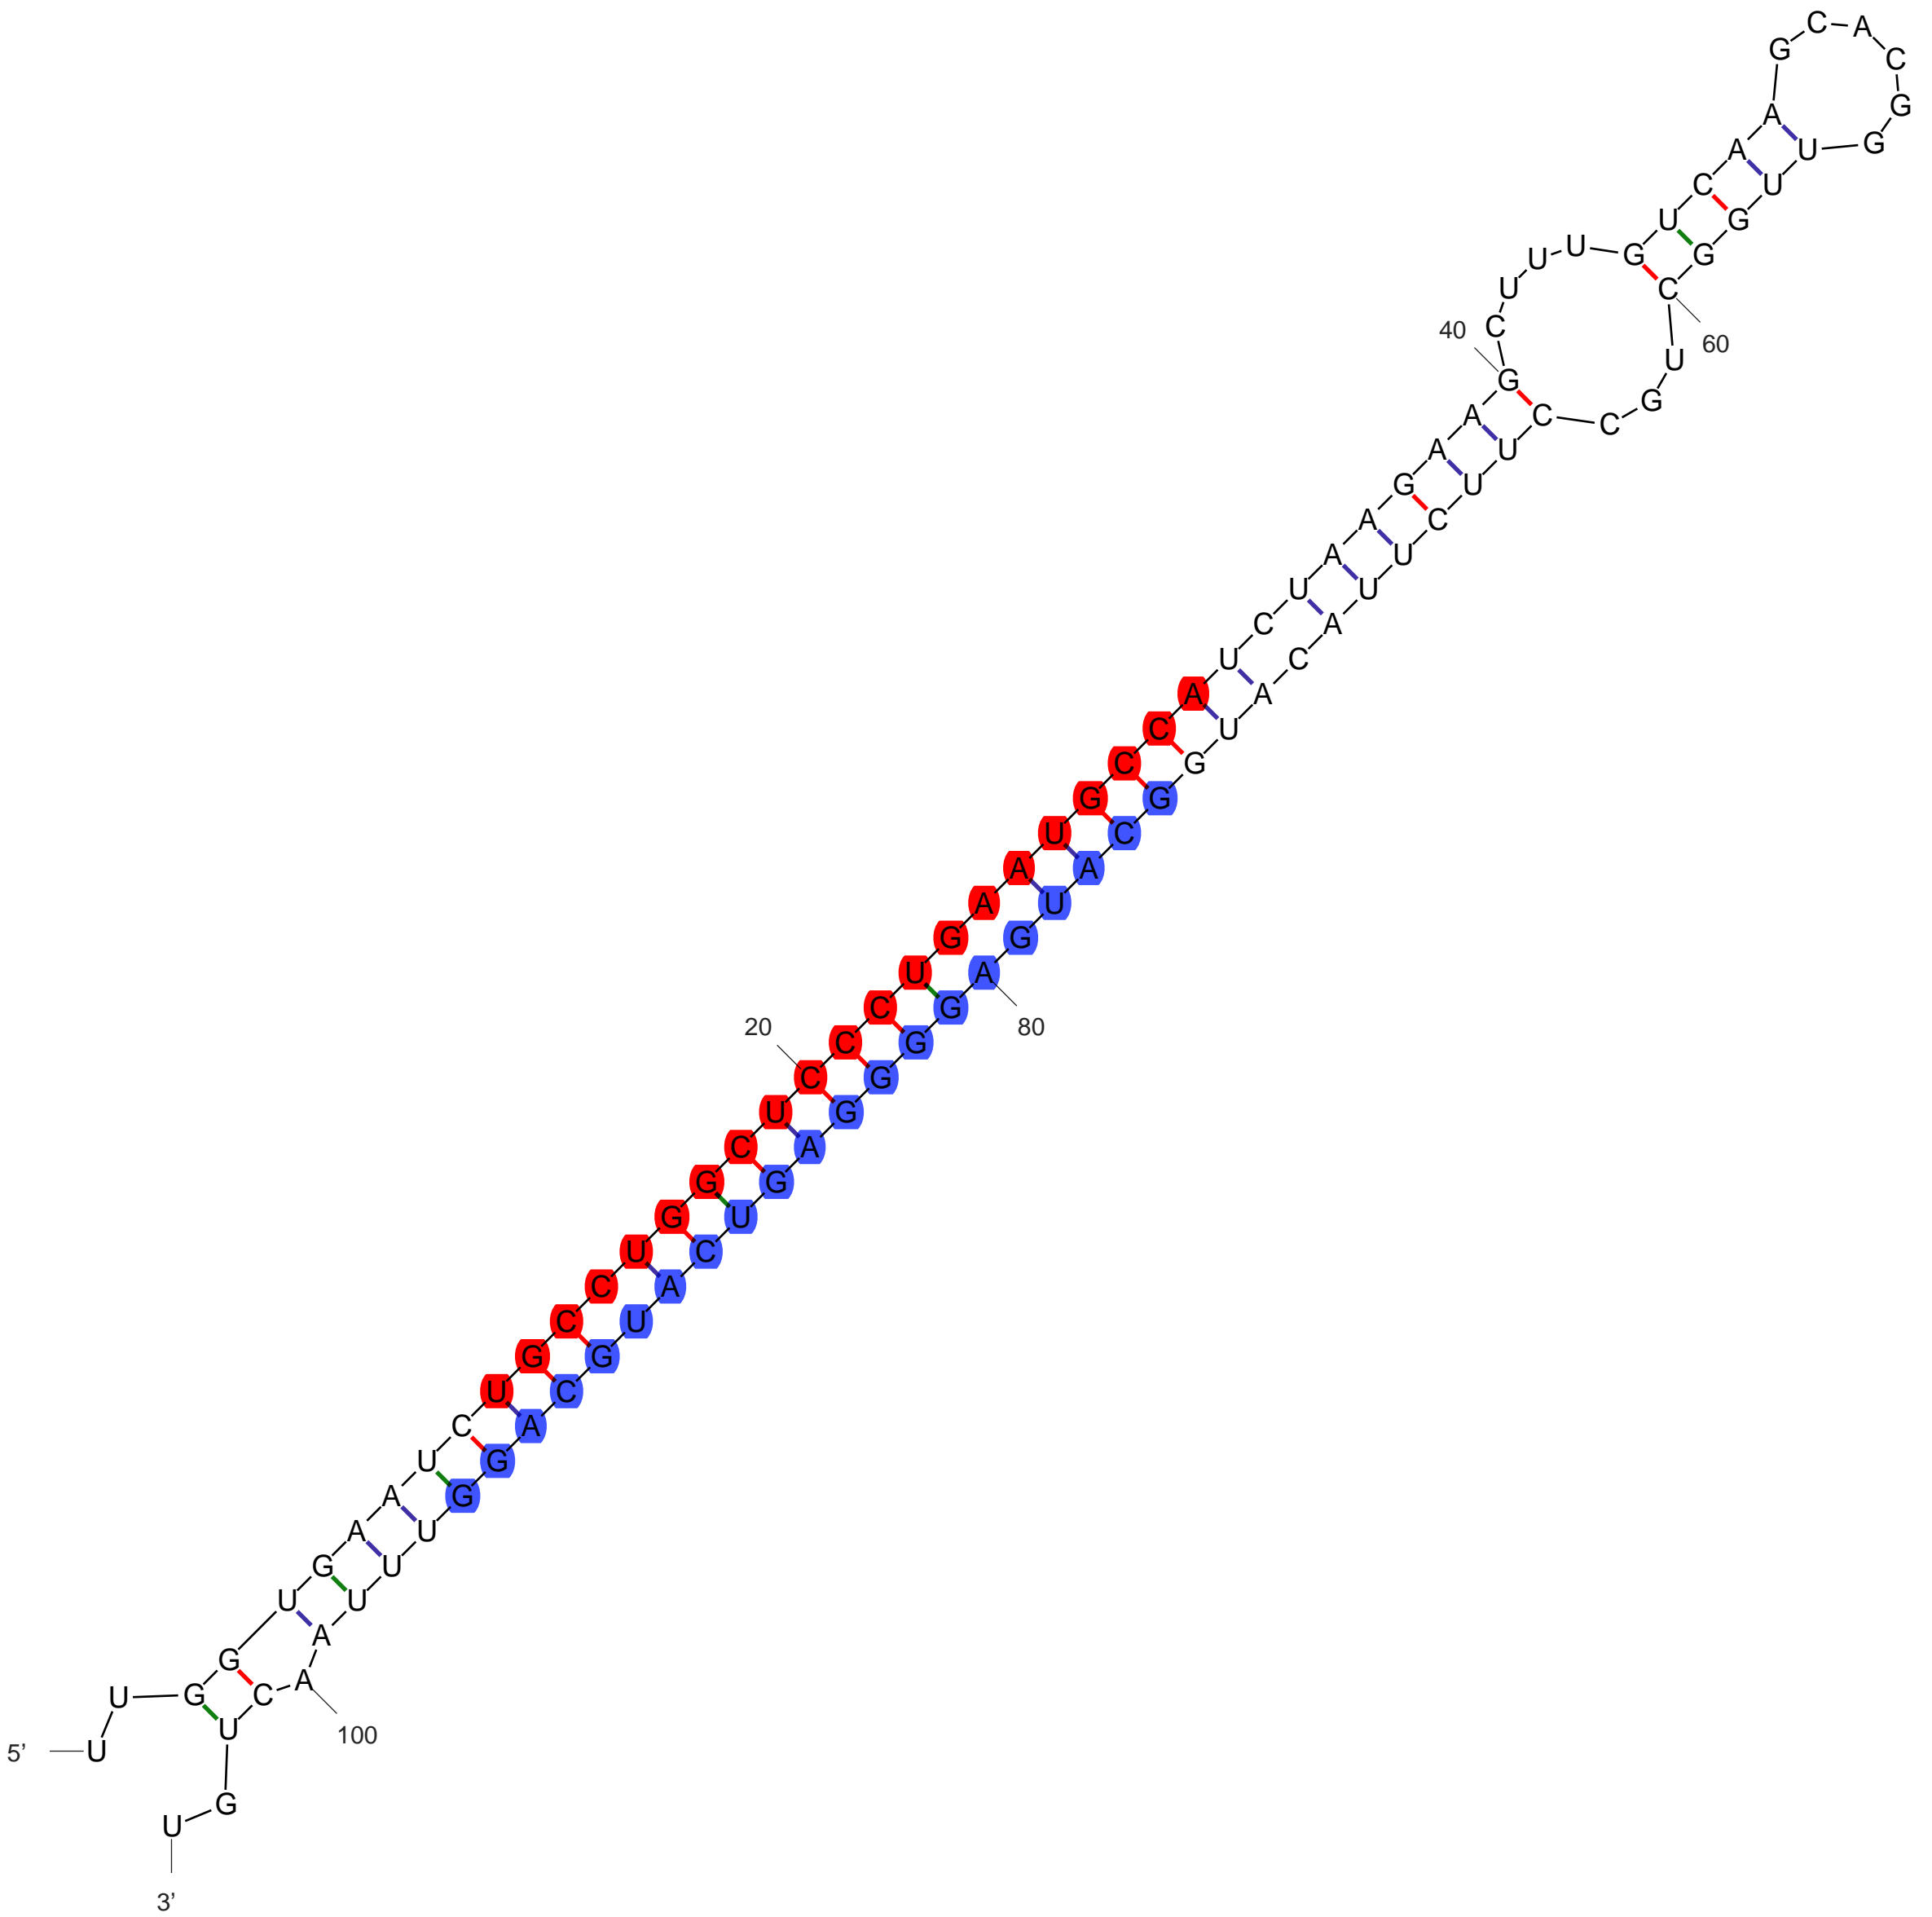

$dG = -53.00$  [Initially -53.00] 23-MIR160-[tcc-MIR160a MI0017460]

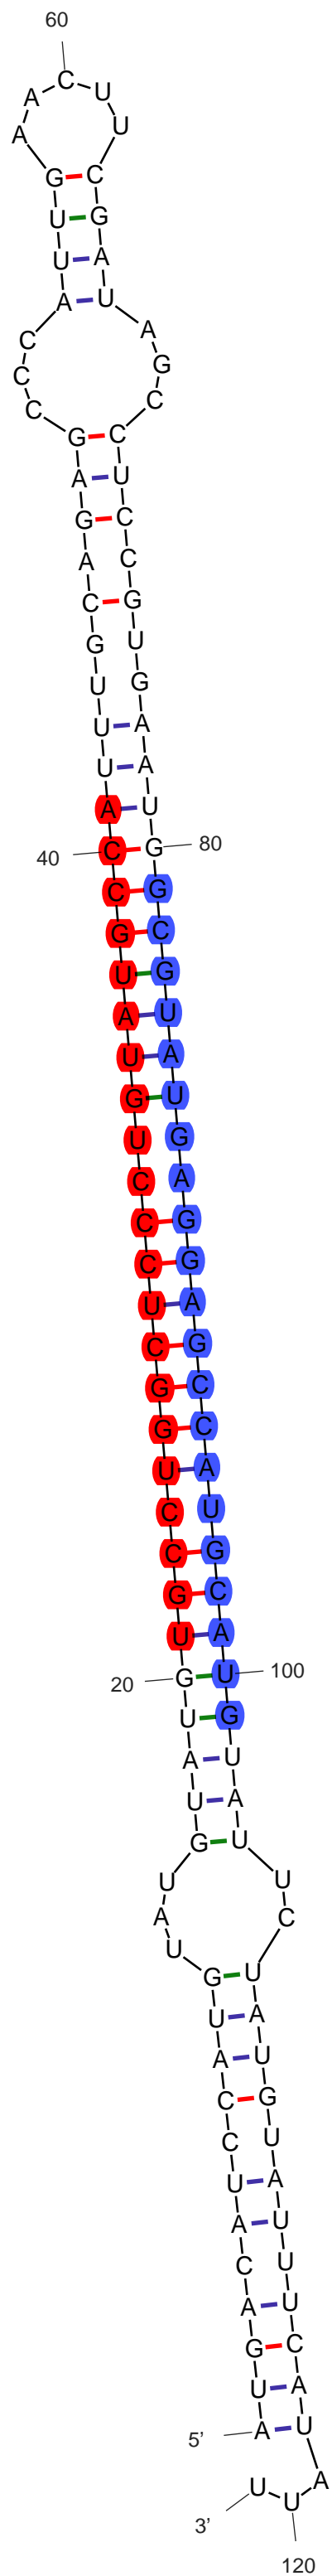

$dG = -53.00$  [Initially -53.00] 24-MIR160-[mdm-MIR160e MI0023008]

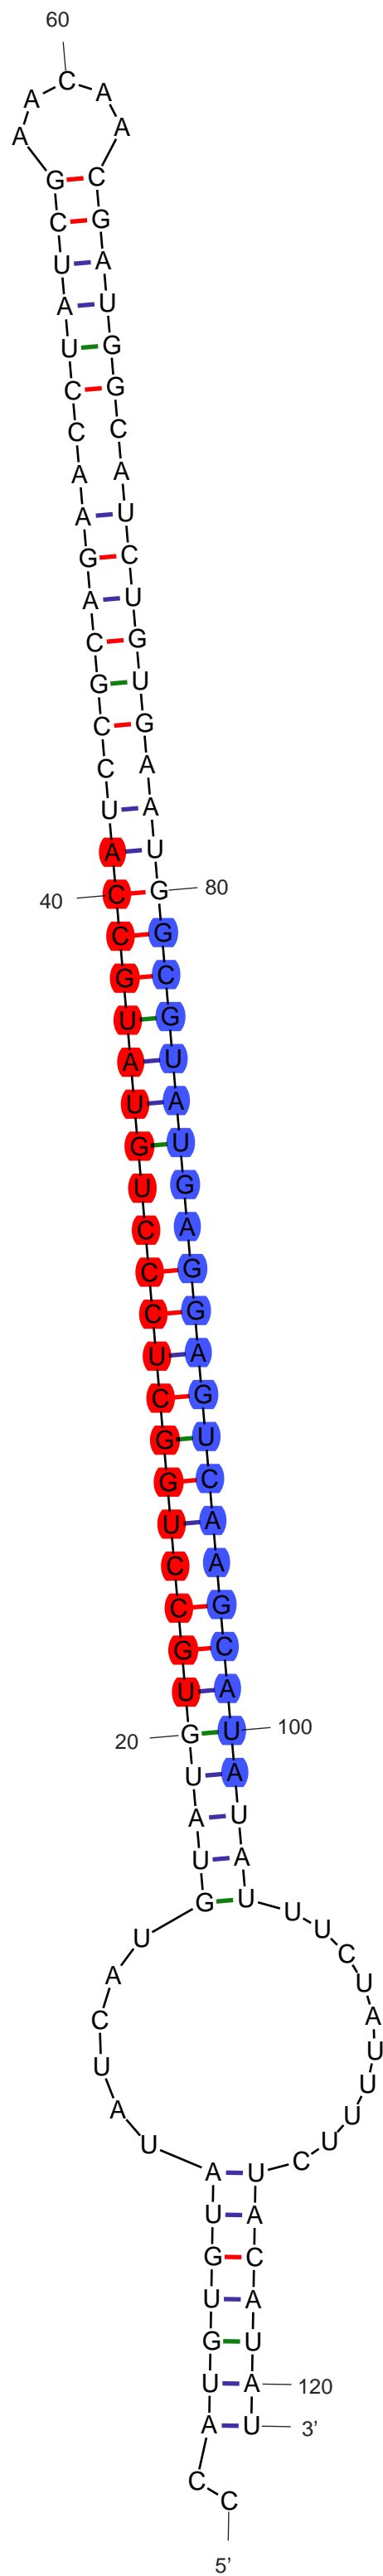

$dG = -54.10$  [Initially -54.10] 25-MIR160-[mdm-MIR160c MI0023006]



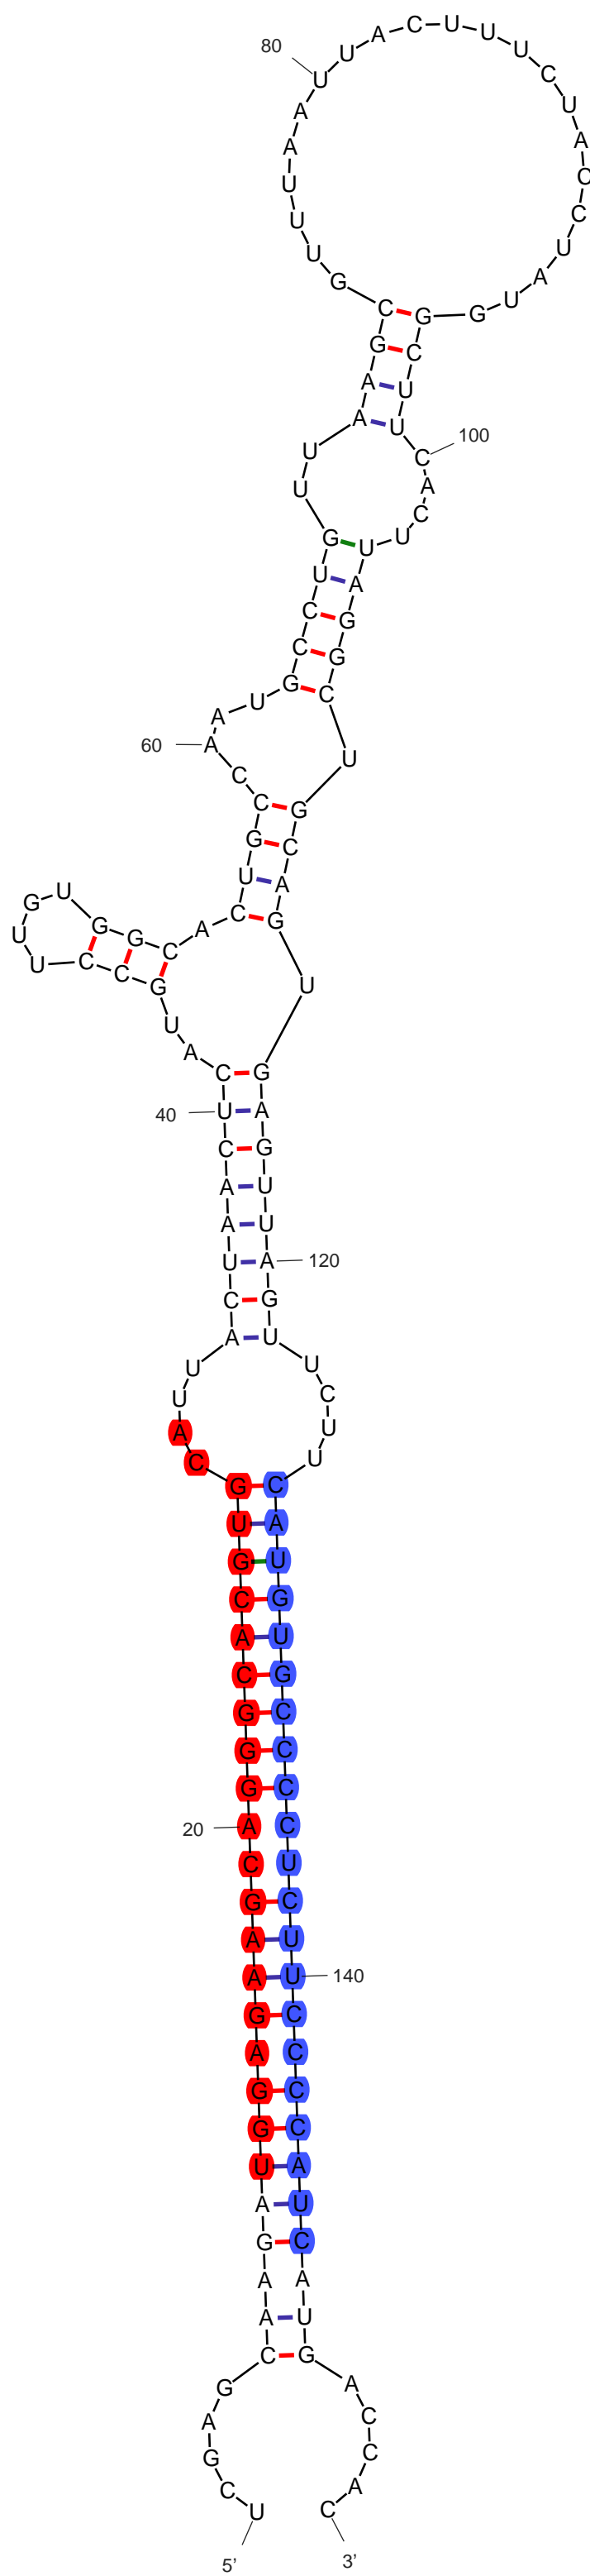

**$dG = -57.10$  [Initially -58.90] 28-MIR164**

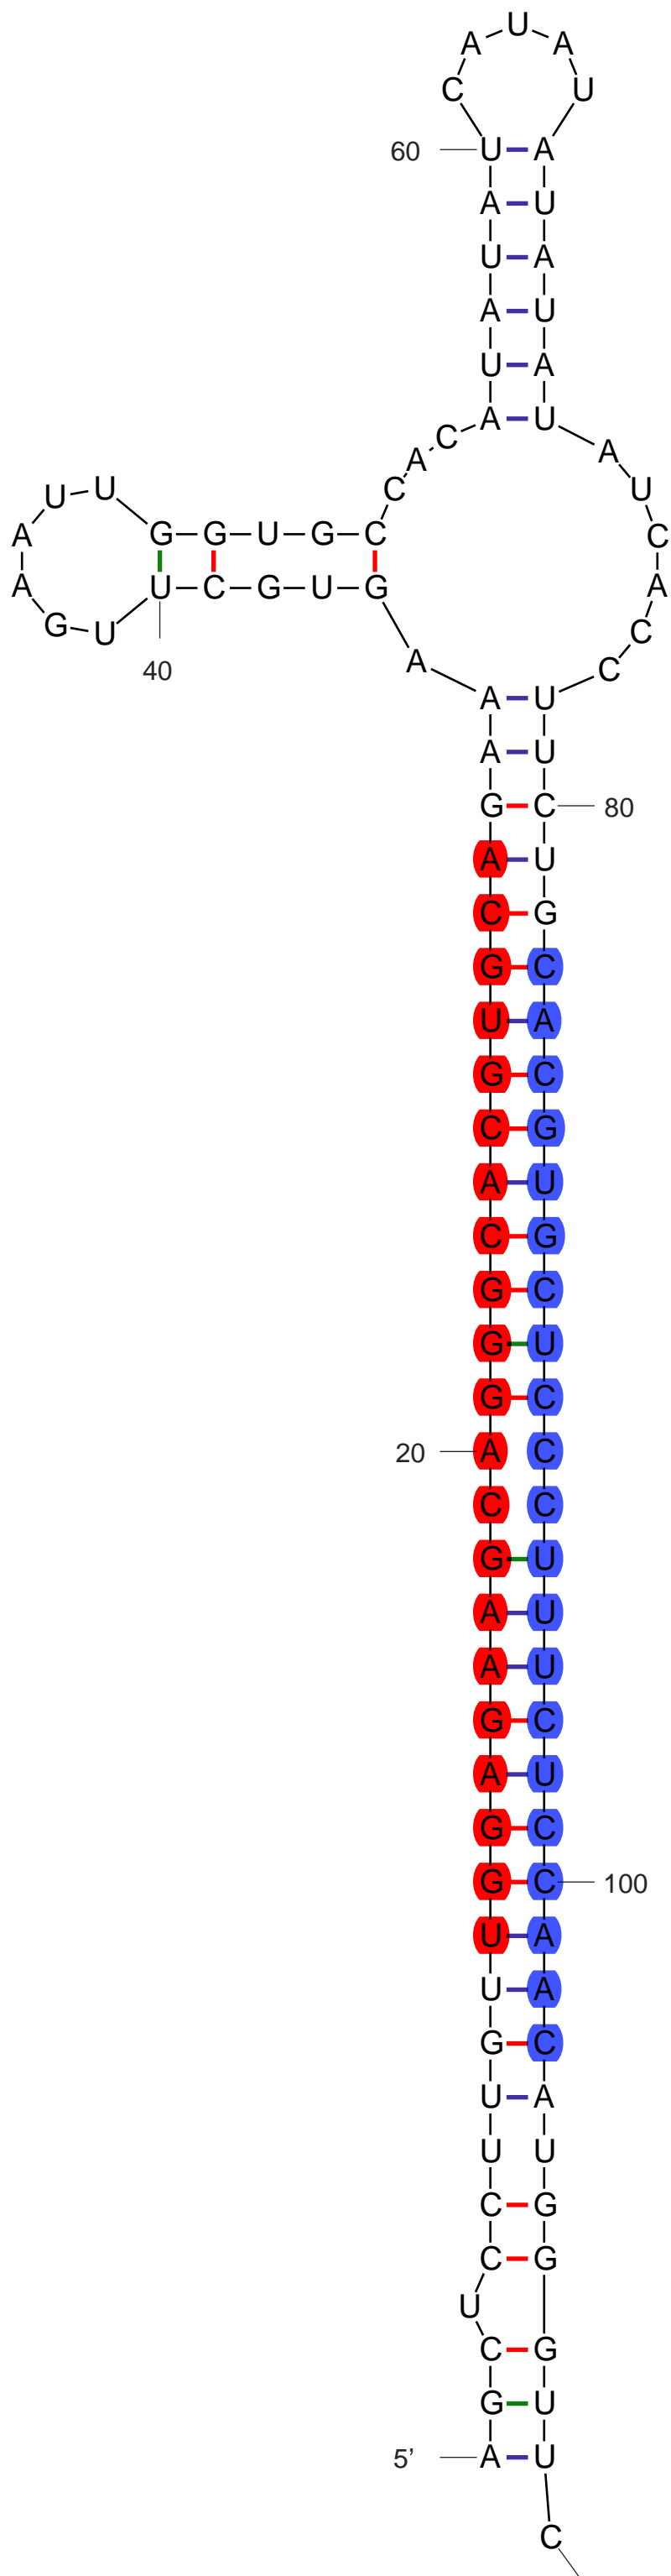

$dG = -48.54$  [Initially -50.50] 29-MIR164





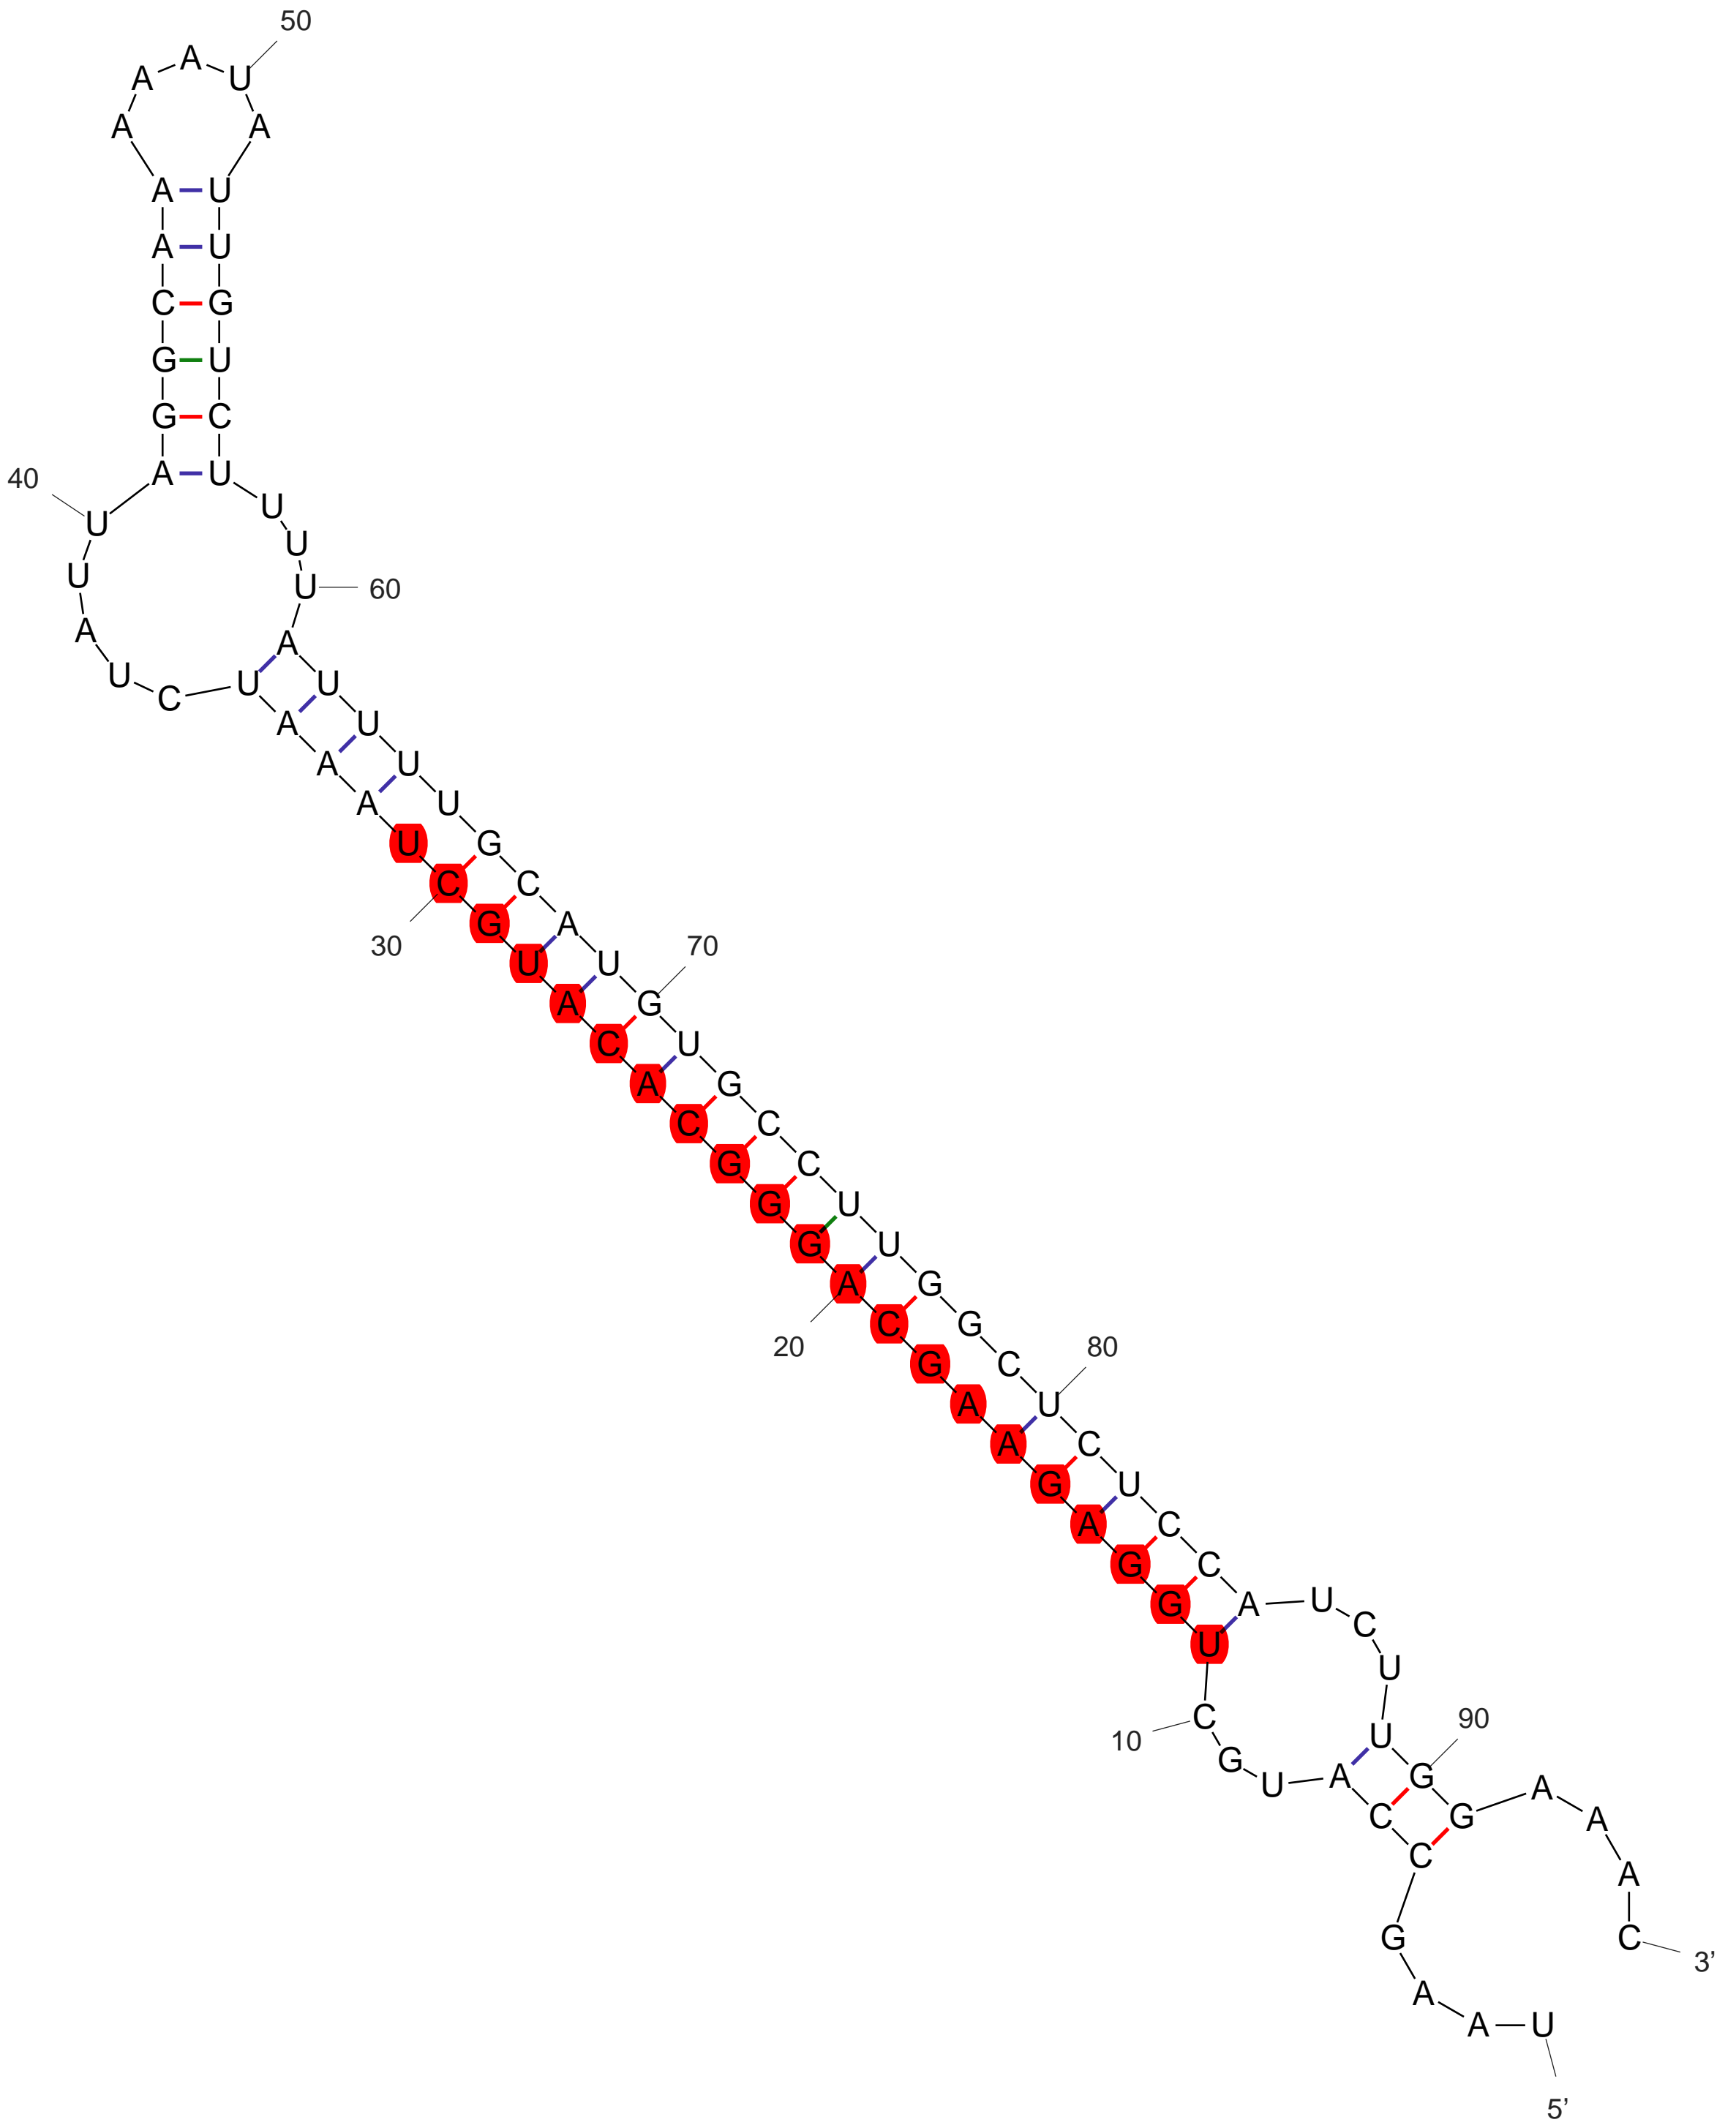

*dG = -40.80 [Initially -40.80] 31-MIR164*

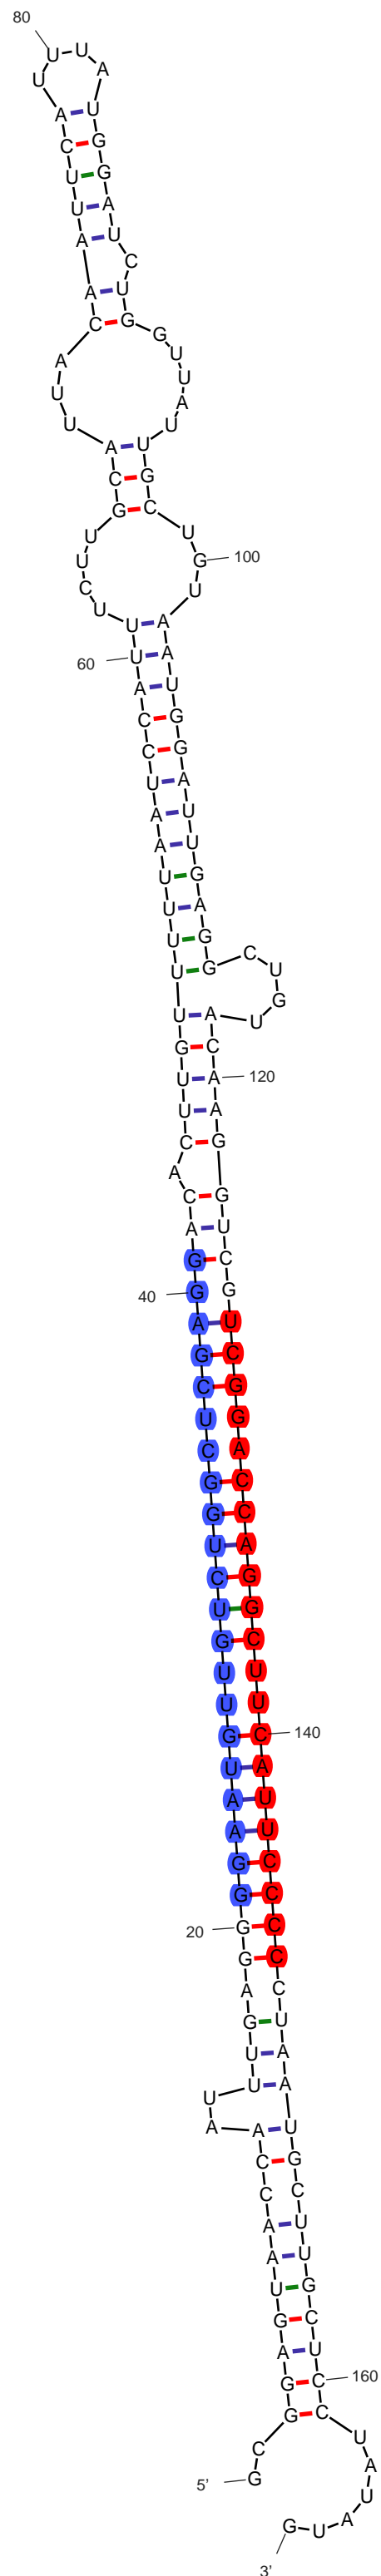

$dG = -69.50$  [Initially -69.50] 32-MIR166

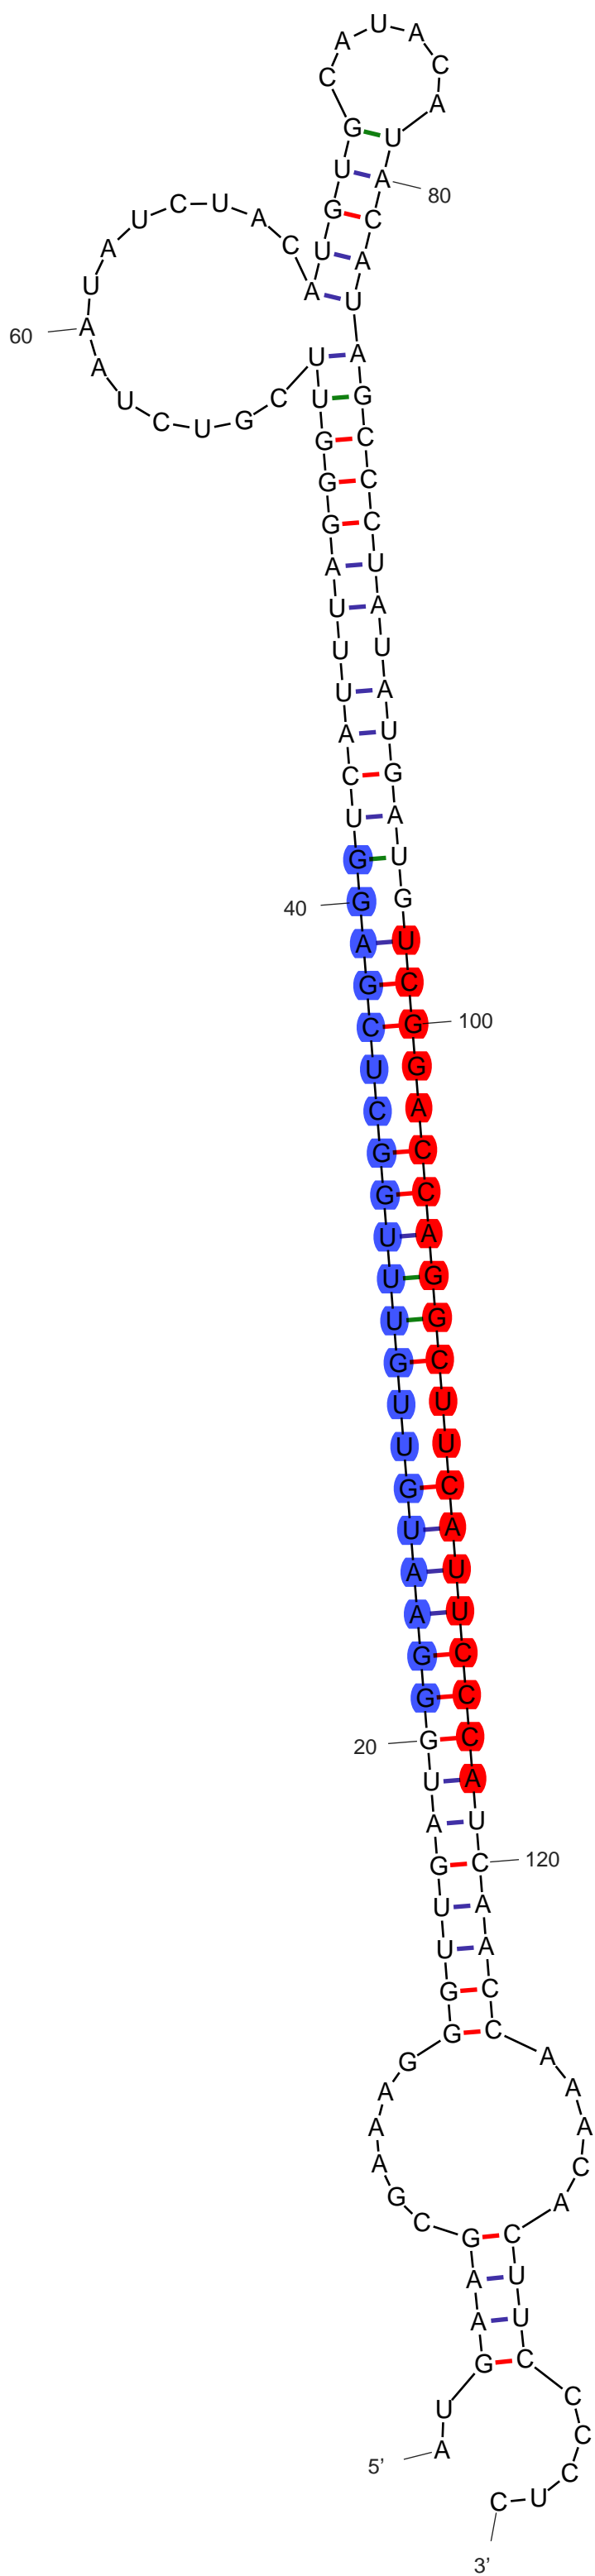

$dG = -59.90$  [Initially -59.90] 33-MIR166

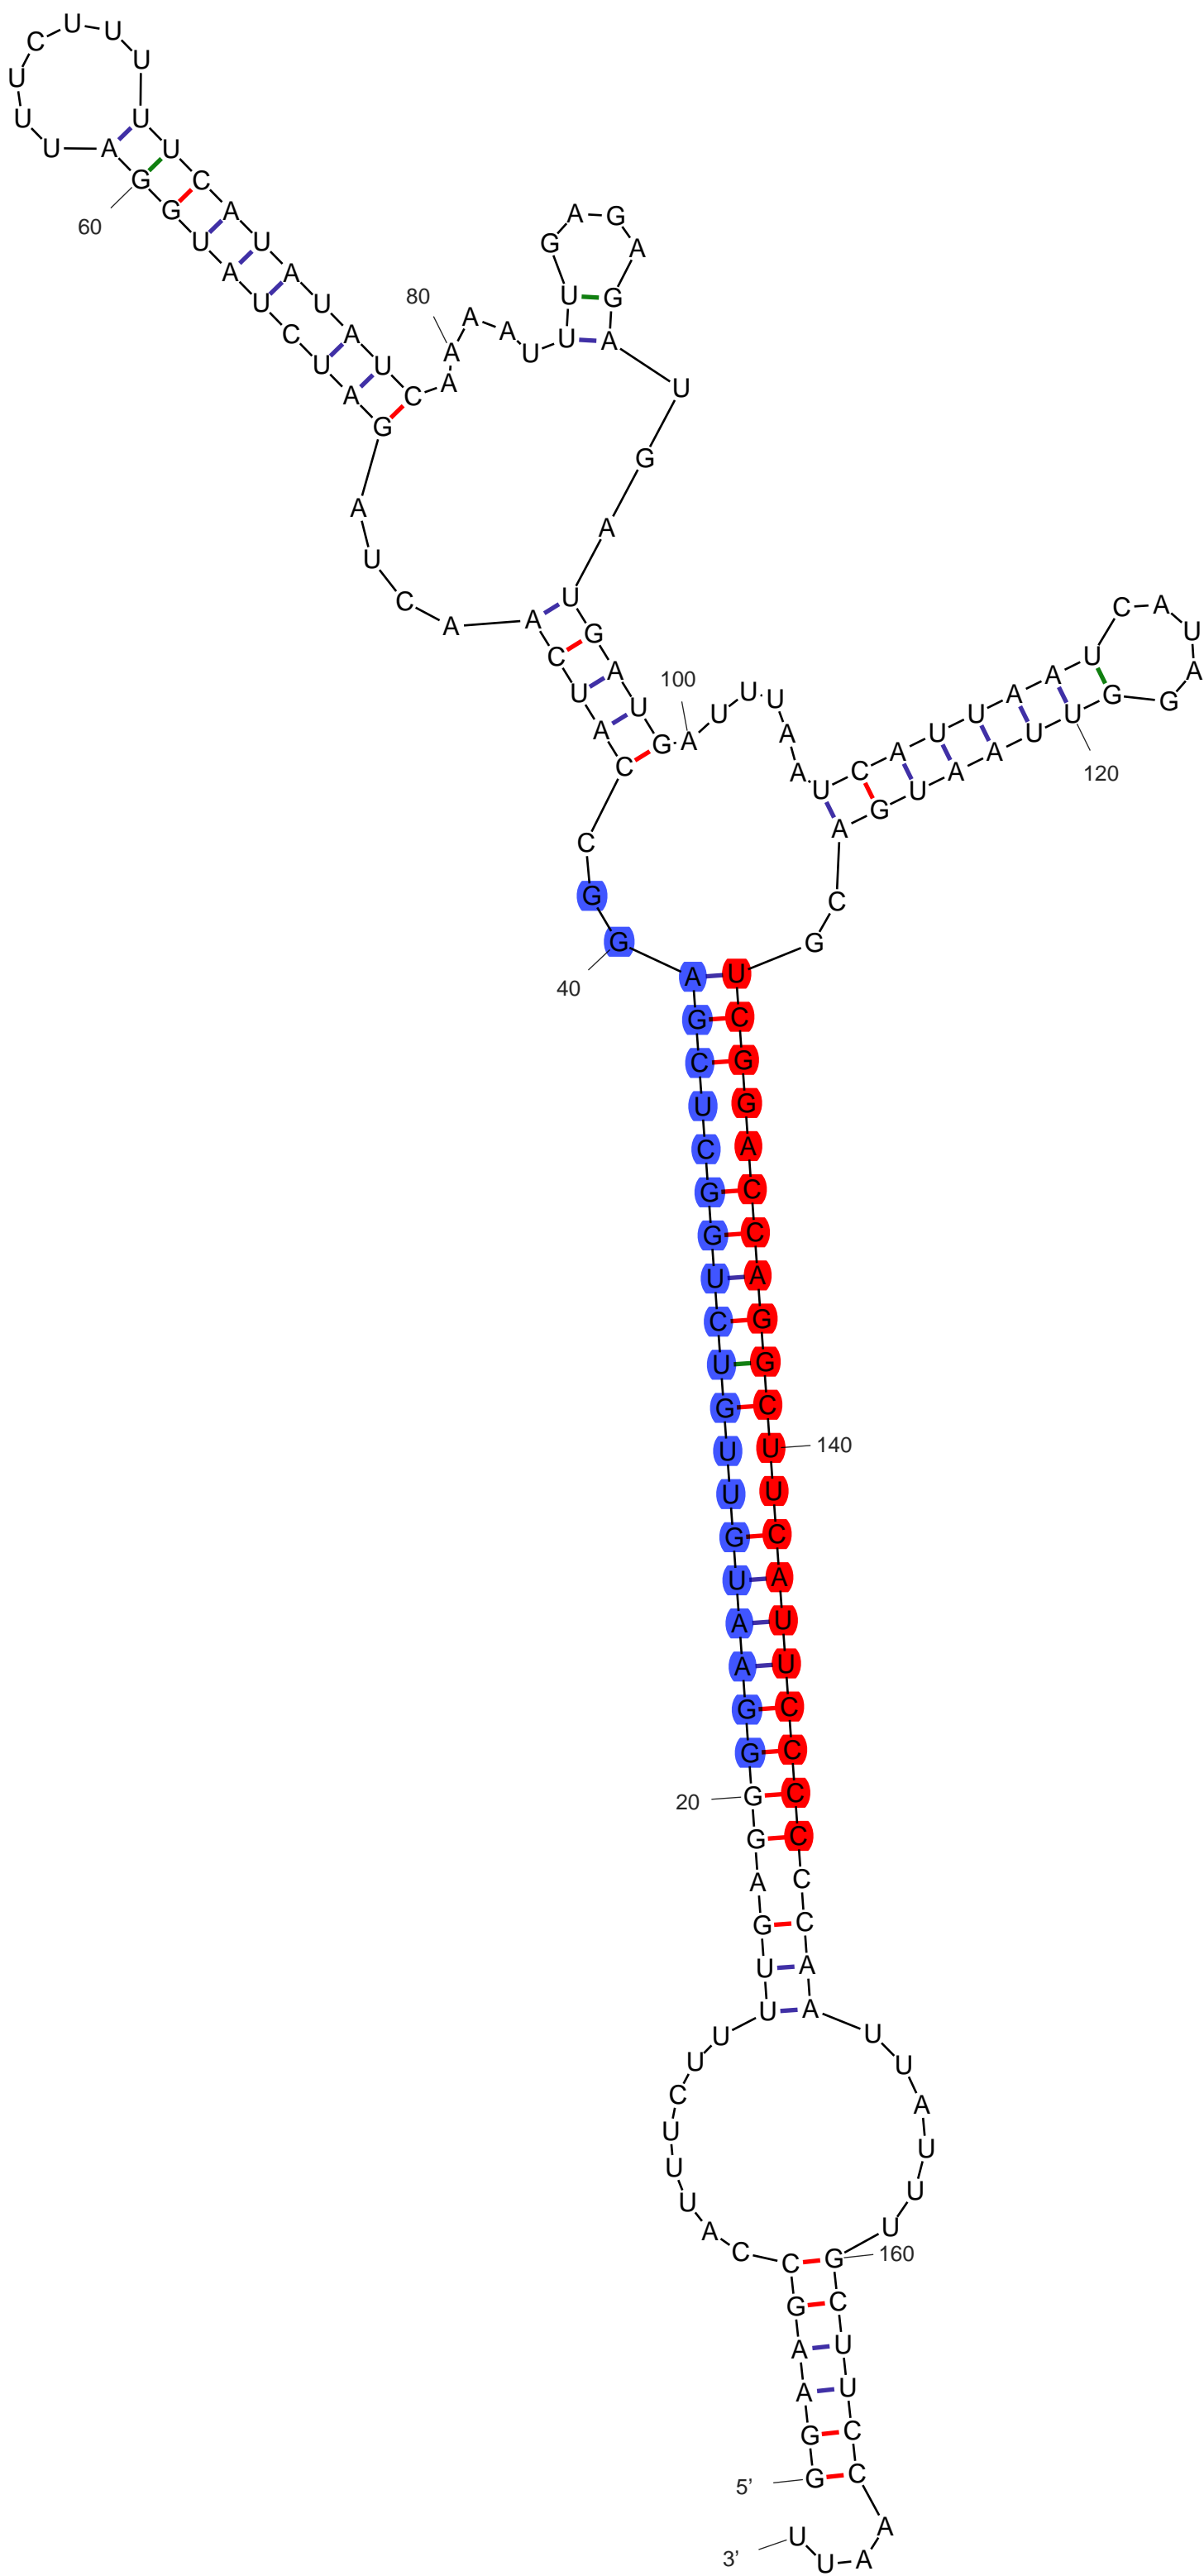

dG = -52.37 [Initially -59.20] 34-MIR166

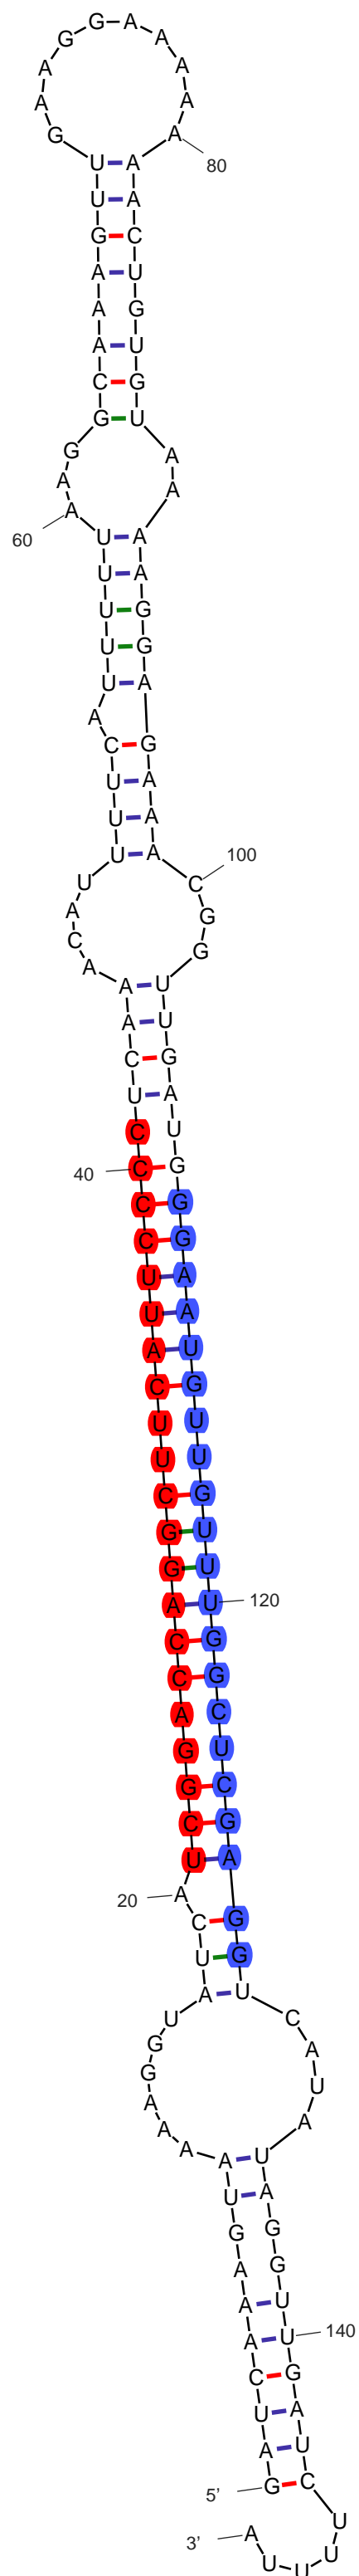

$dG = -42.20$  [Initially  $-42.20$ ] 35-MIR166

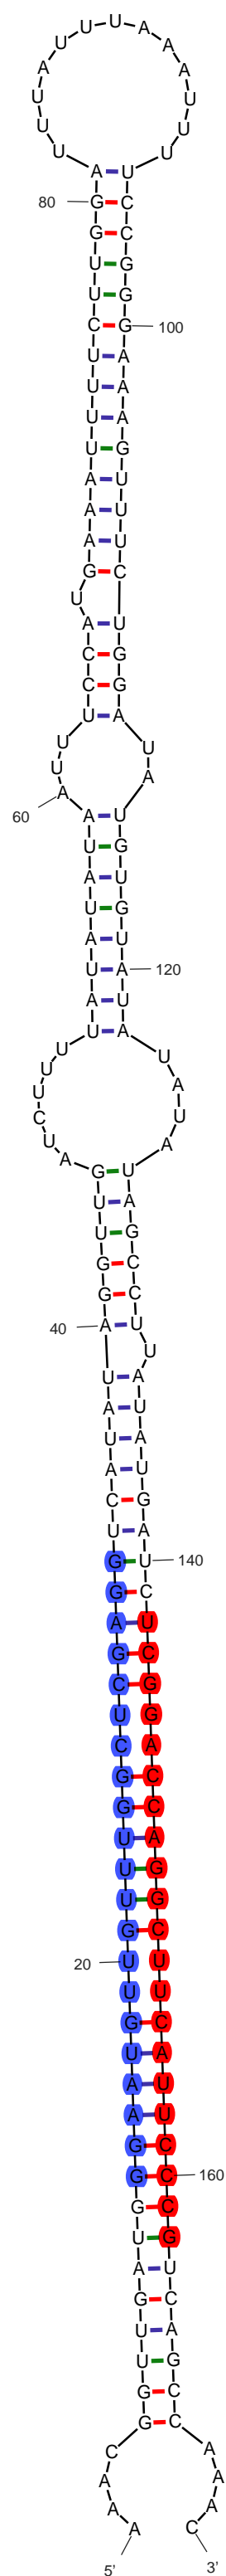

$dG = -85.30$  [Initially -85.30] 36-MIR166-[tcc-MIR166b MI0017468]

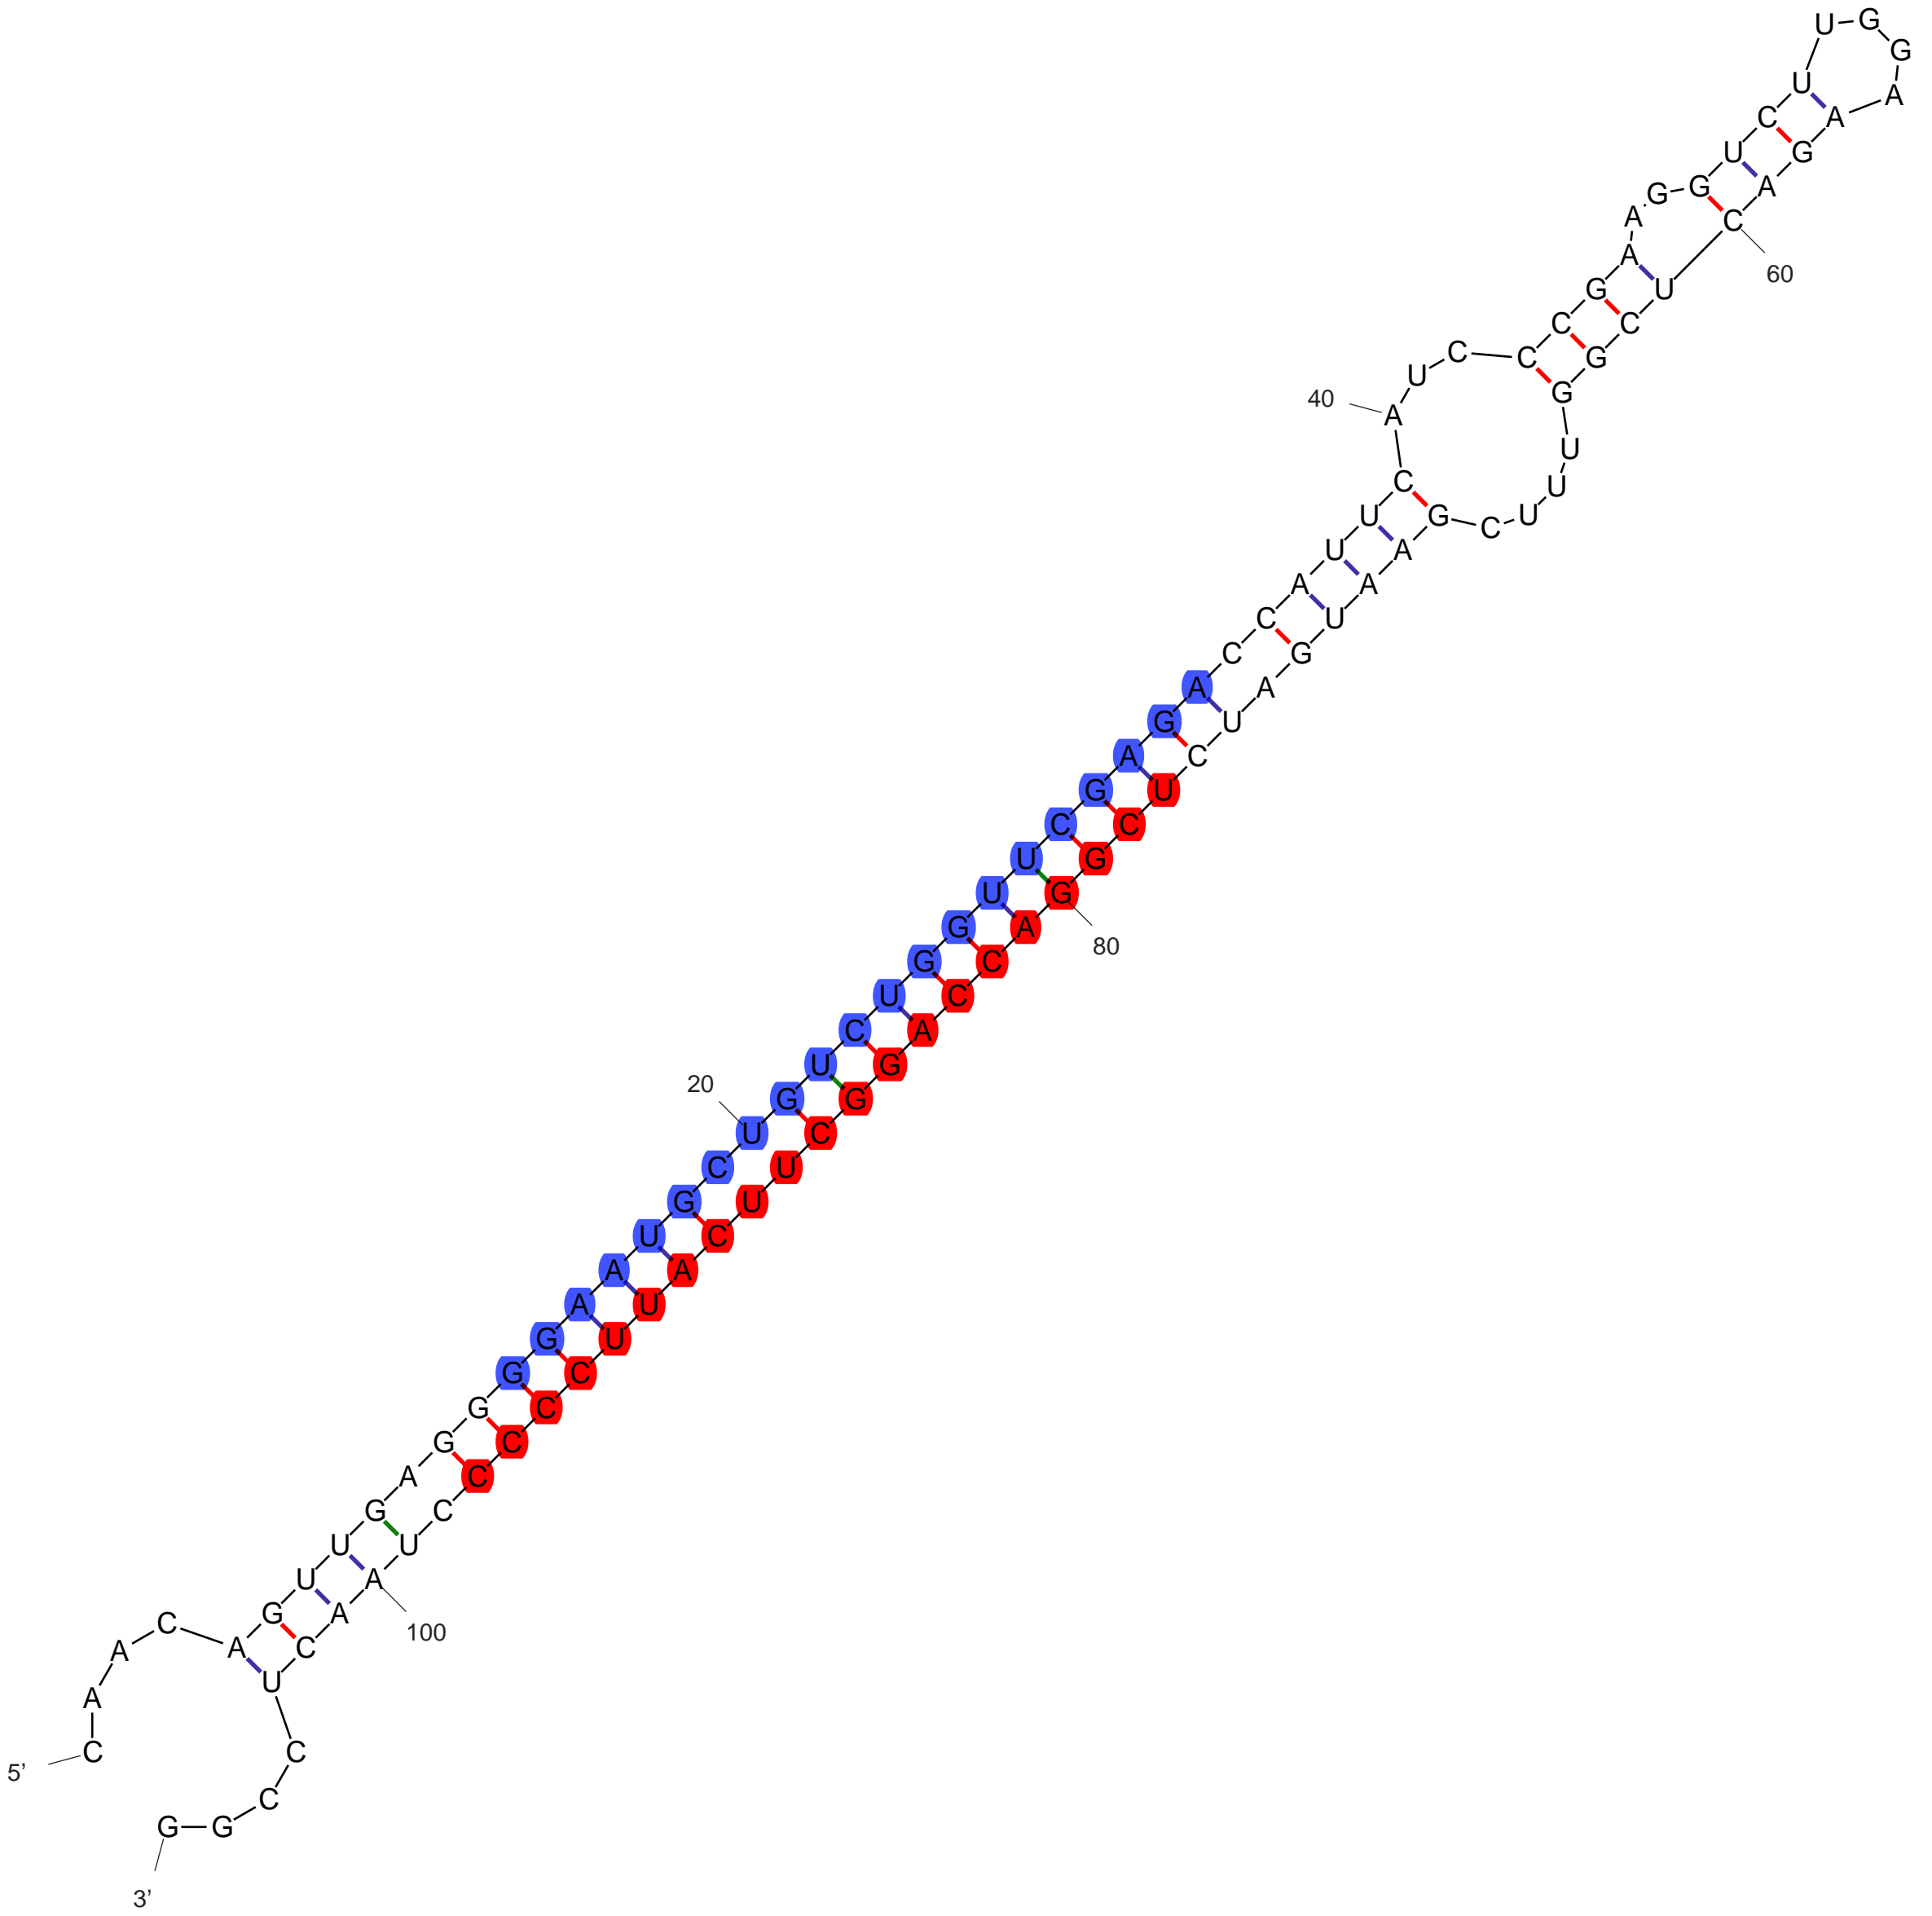

$dG = -55.80$  [Initially -55.80] 37-MIR166

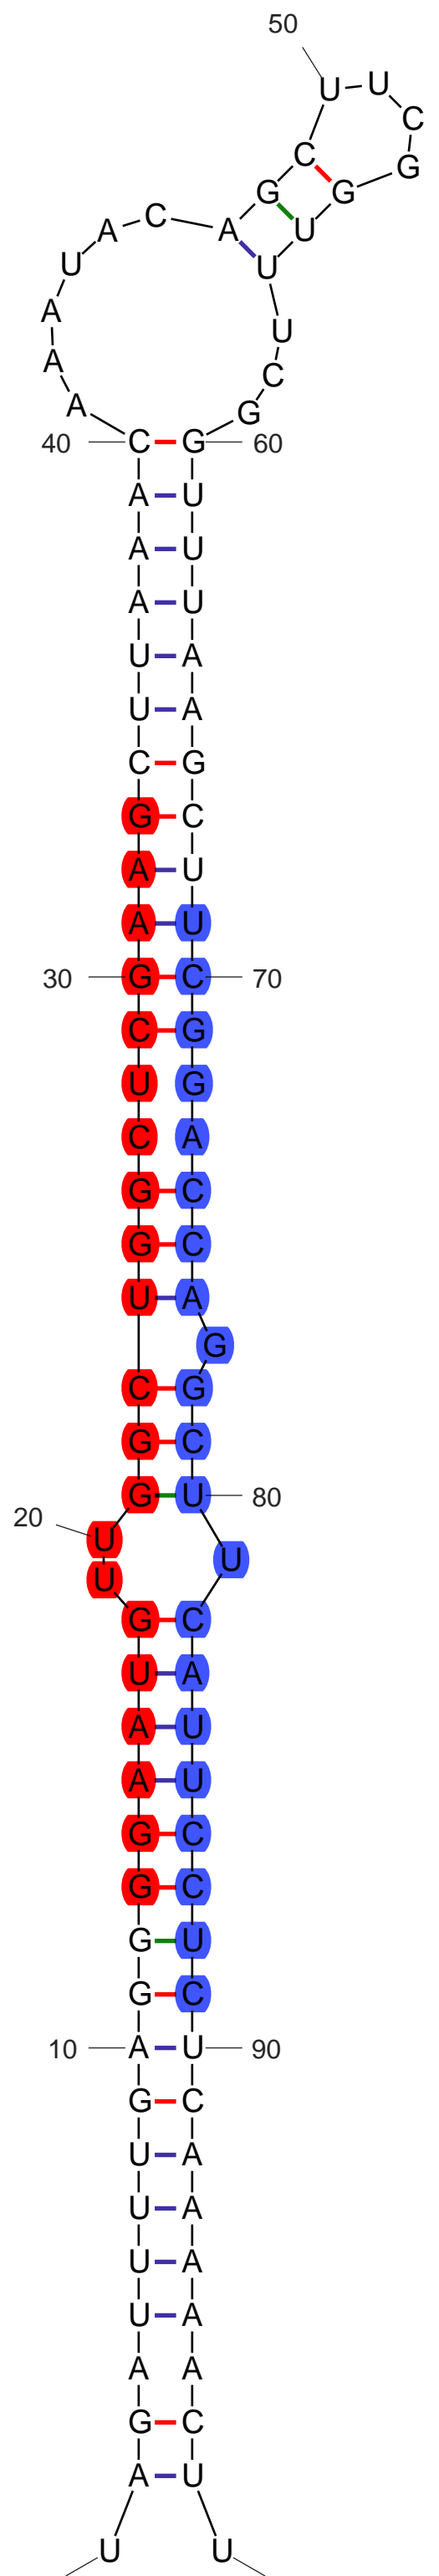

dG = -50.50 [Initially -50.50] 38-MIR166



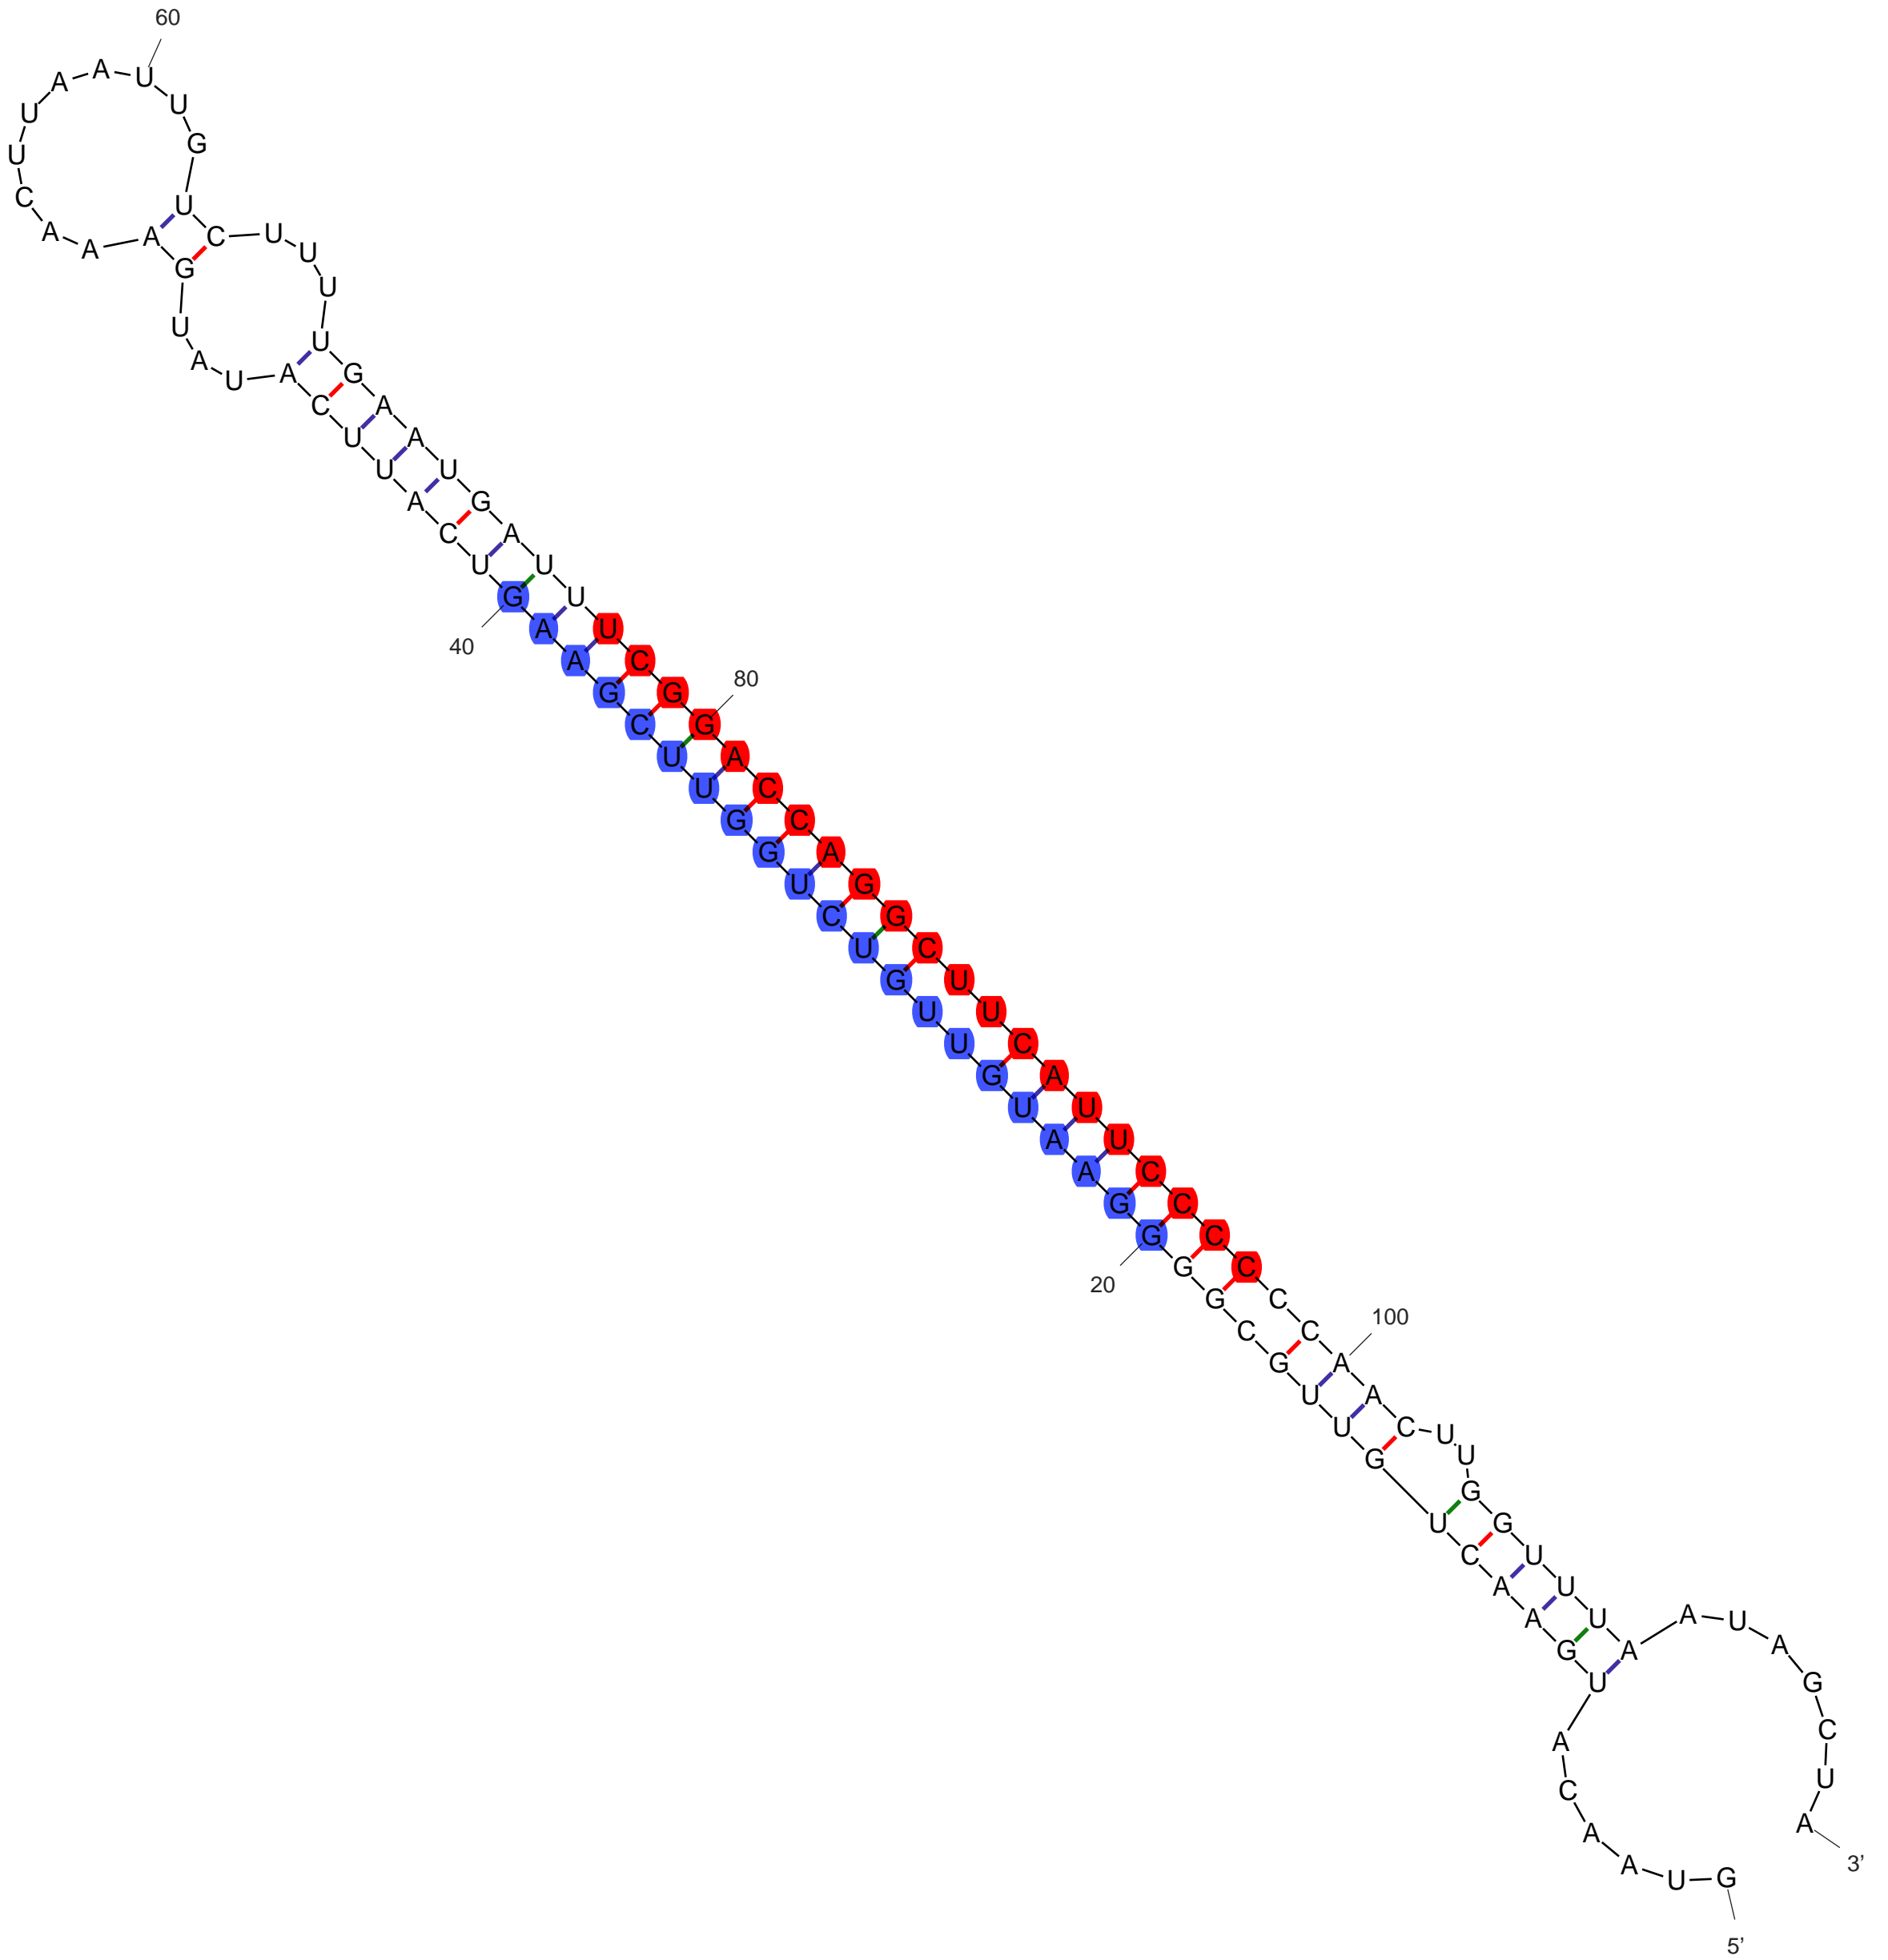

$dG = -55.40$  [Initially -55.40] 39-MIR166-[tcc-MIR166a MI0017467]

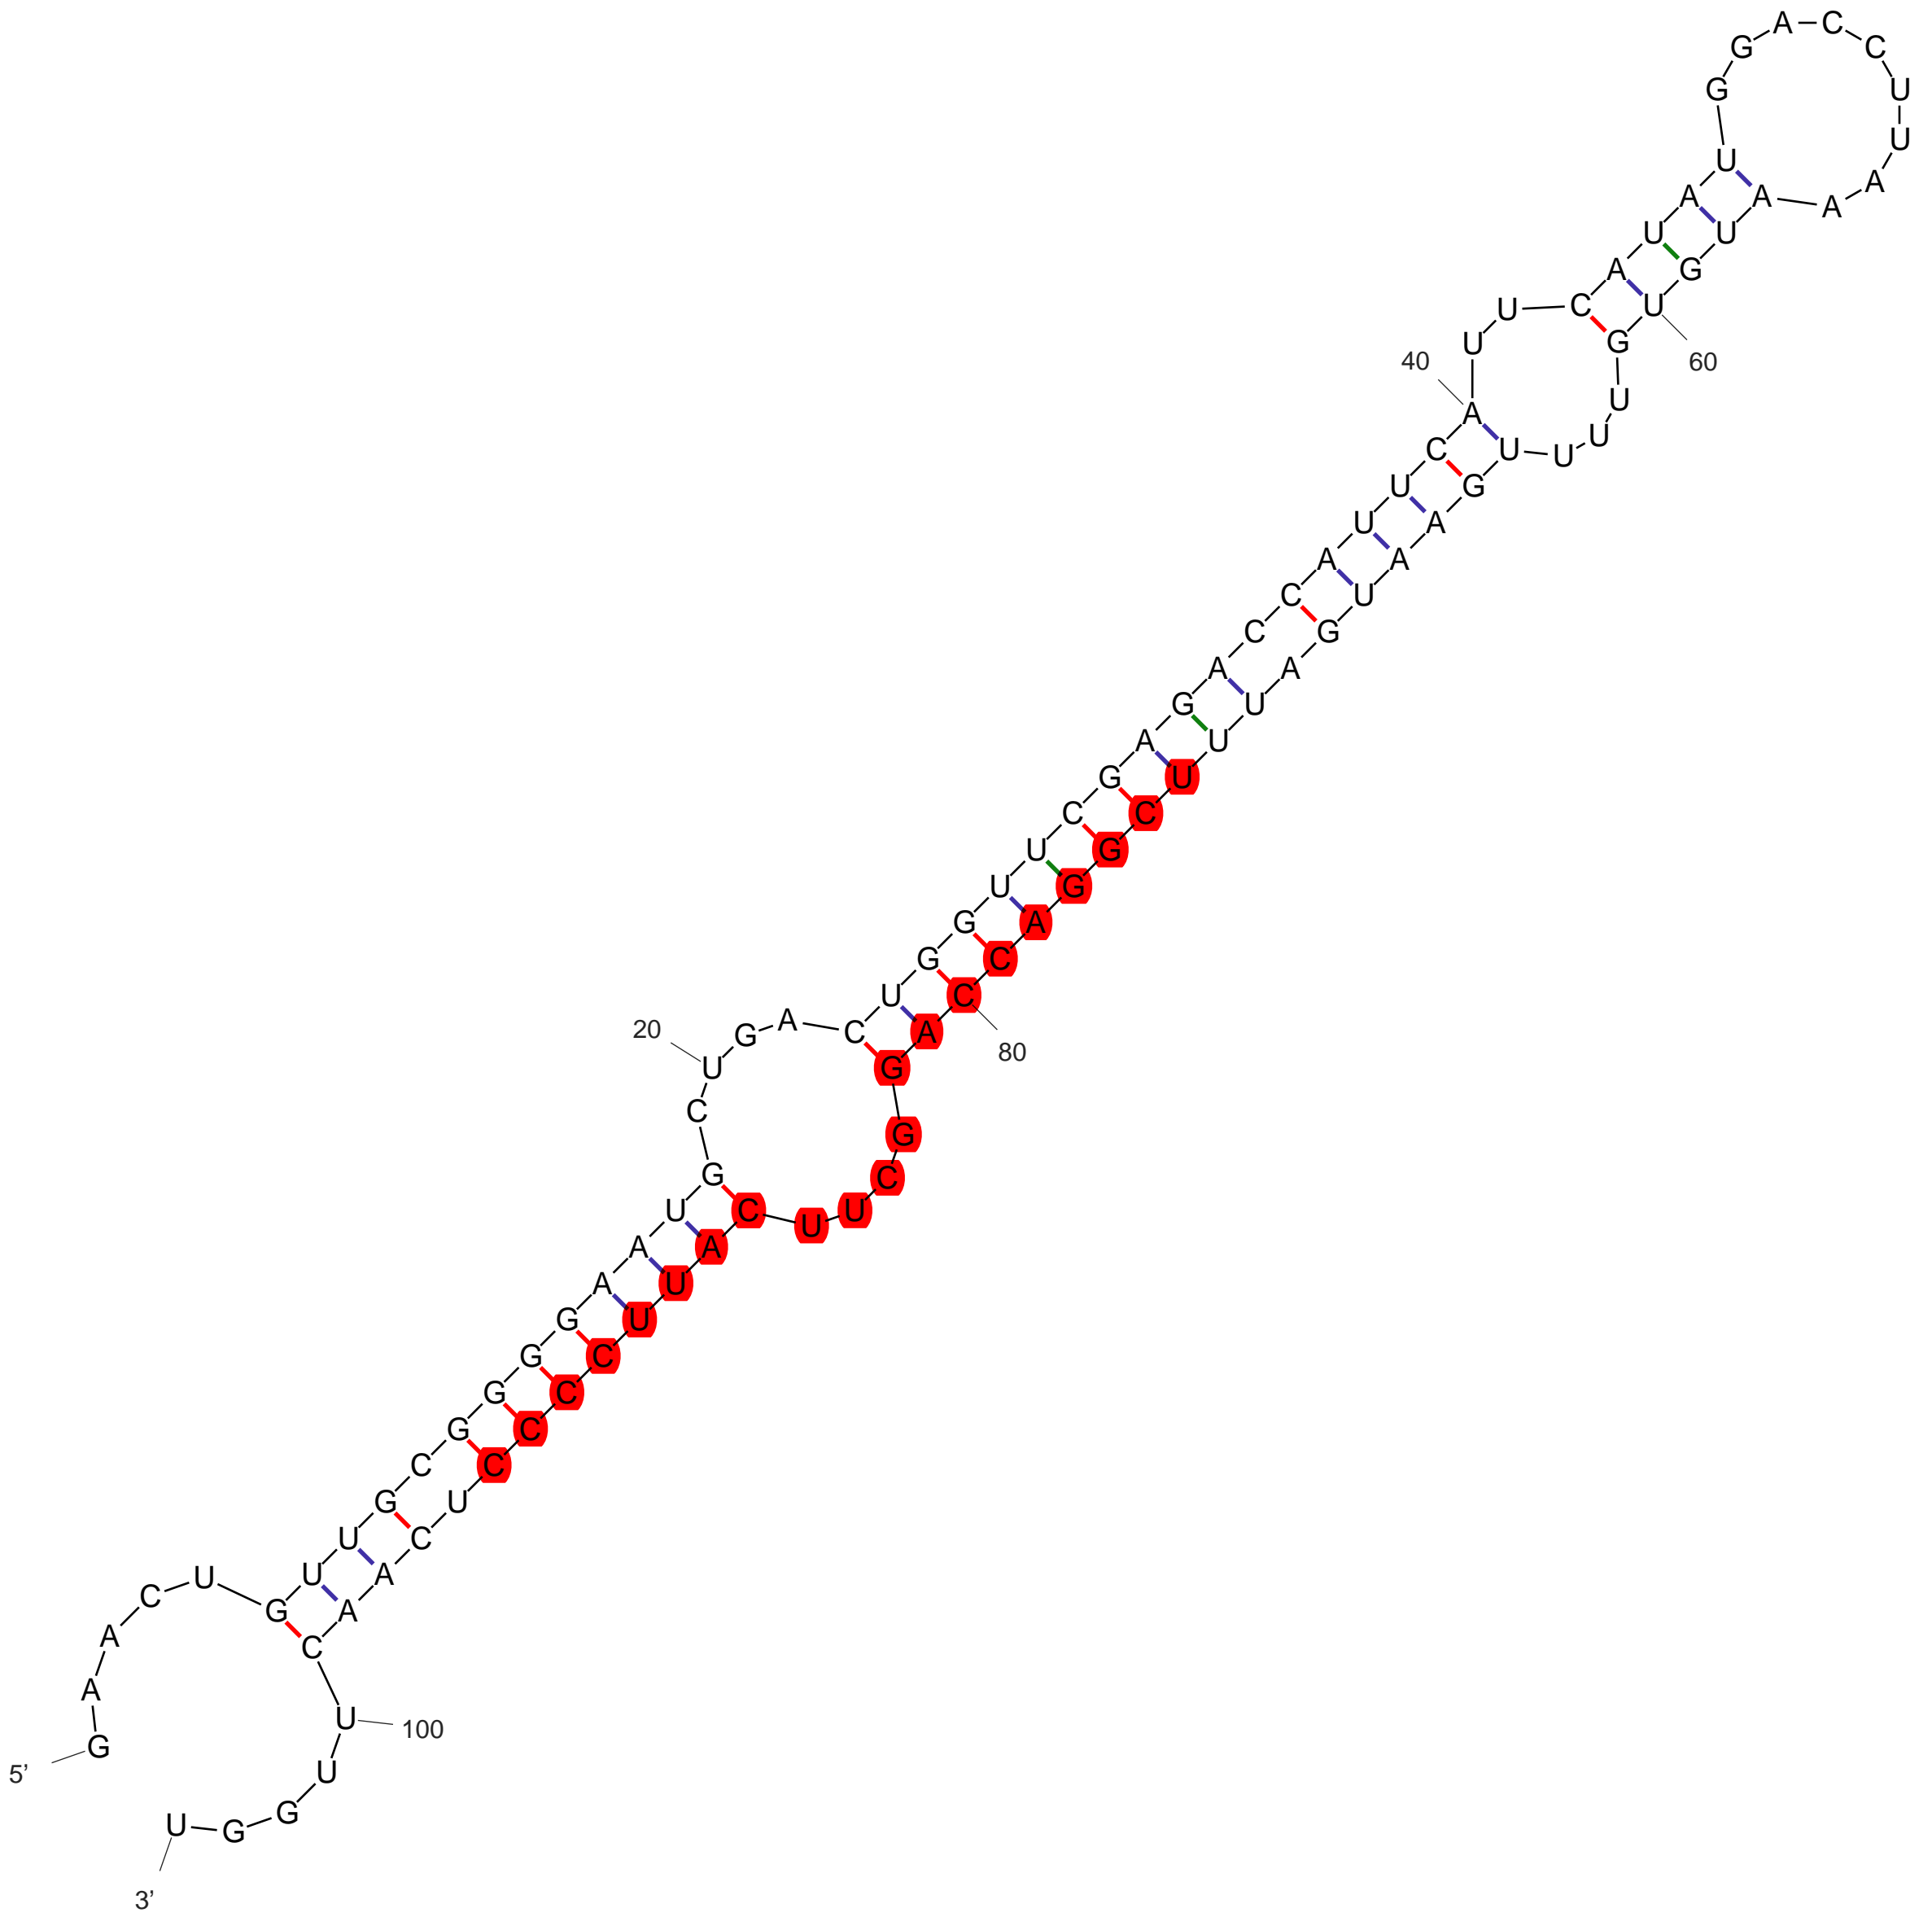

$dG = -47.30$  [Initially  $-47.30$ ] 40-MIR166

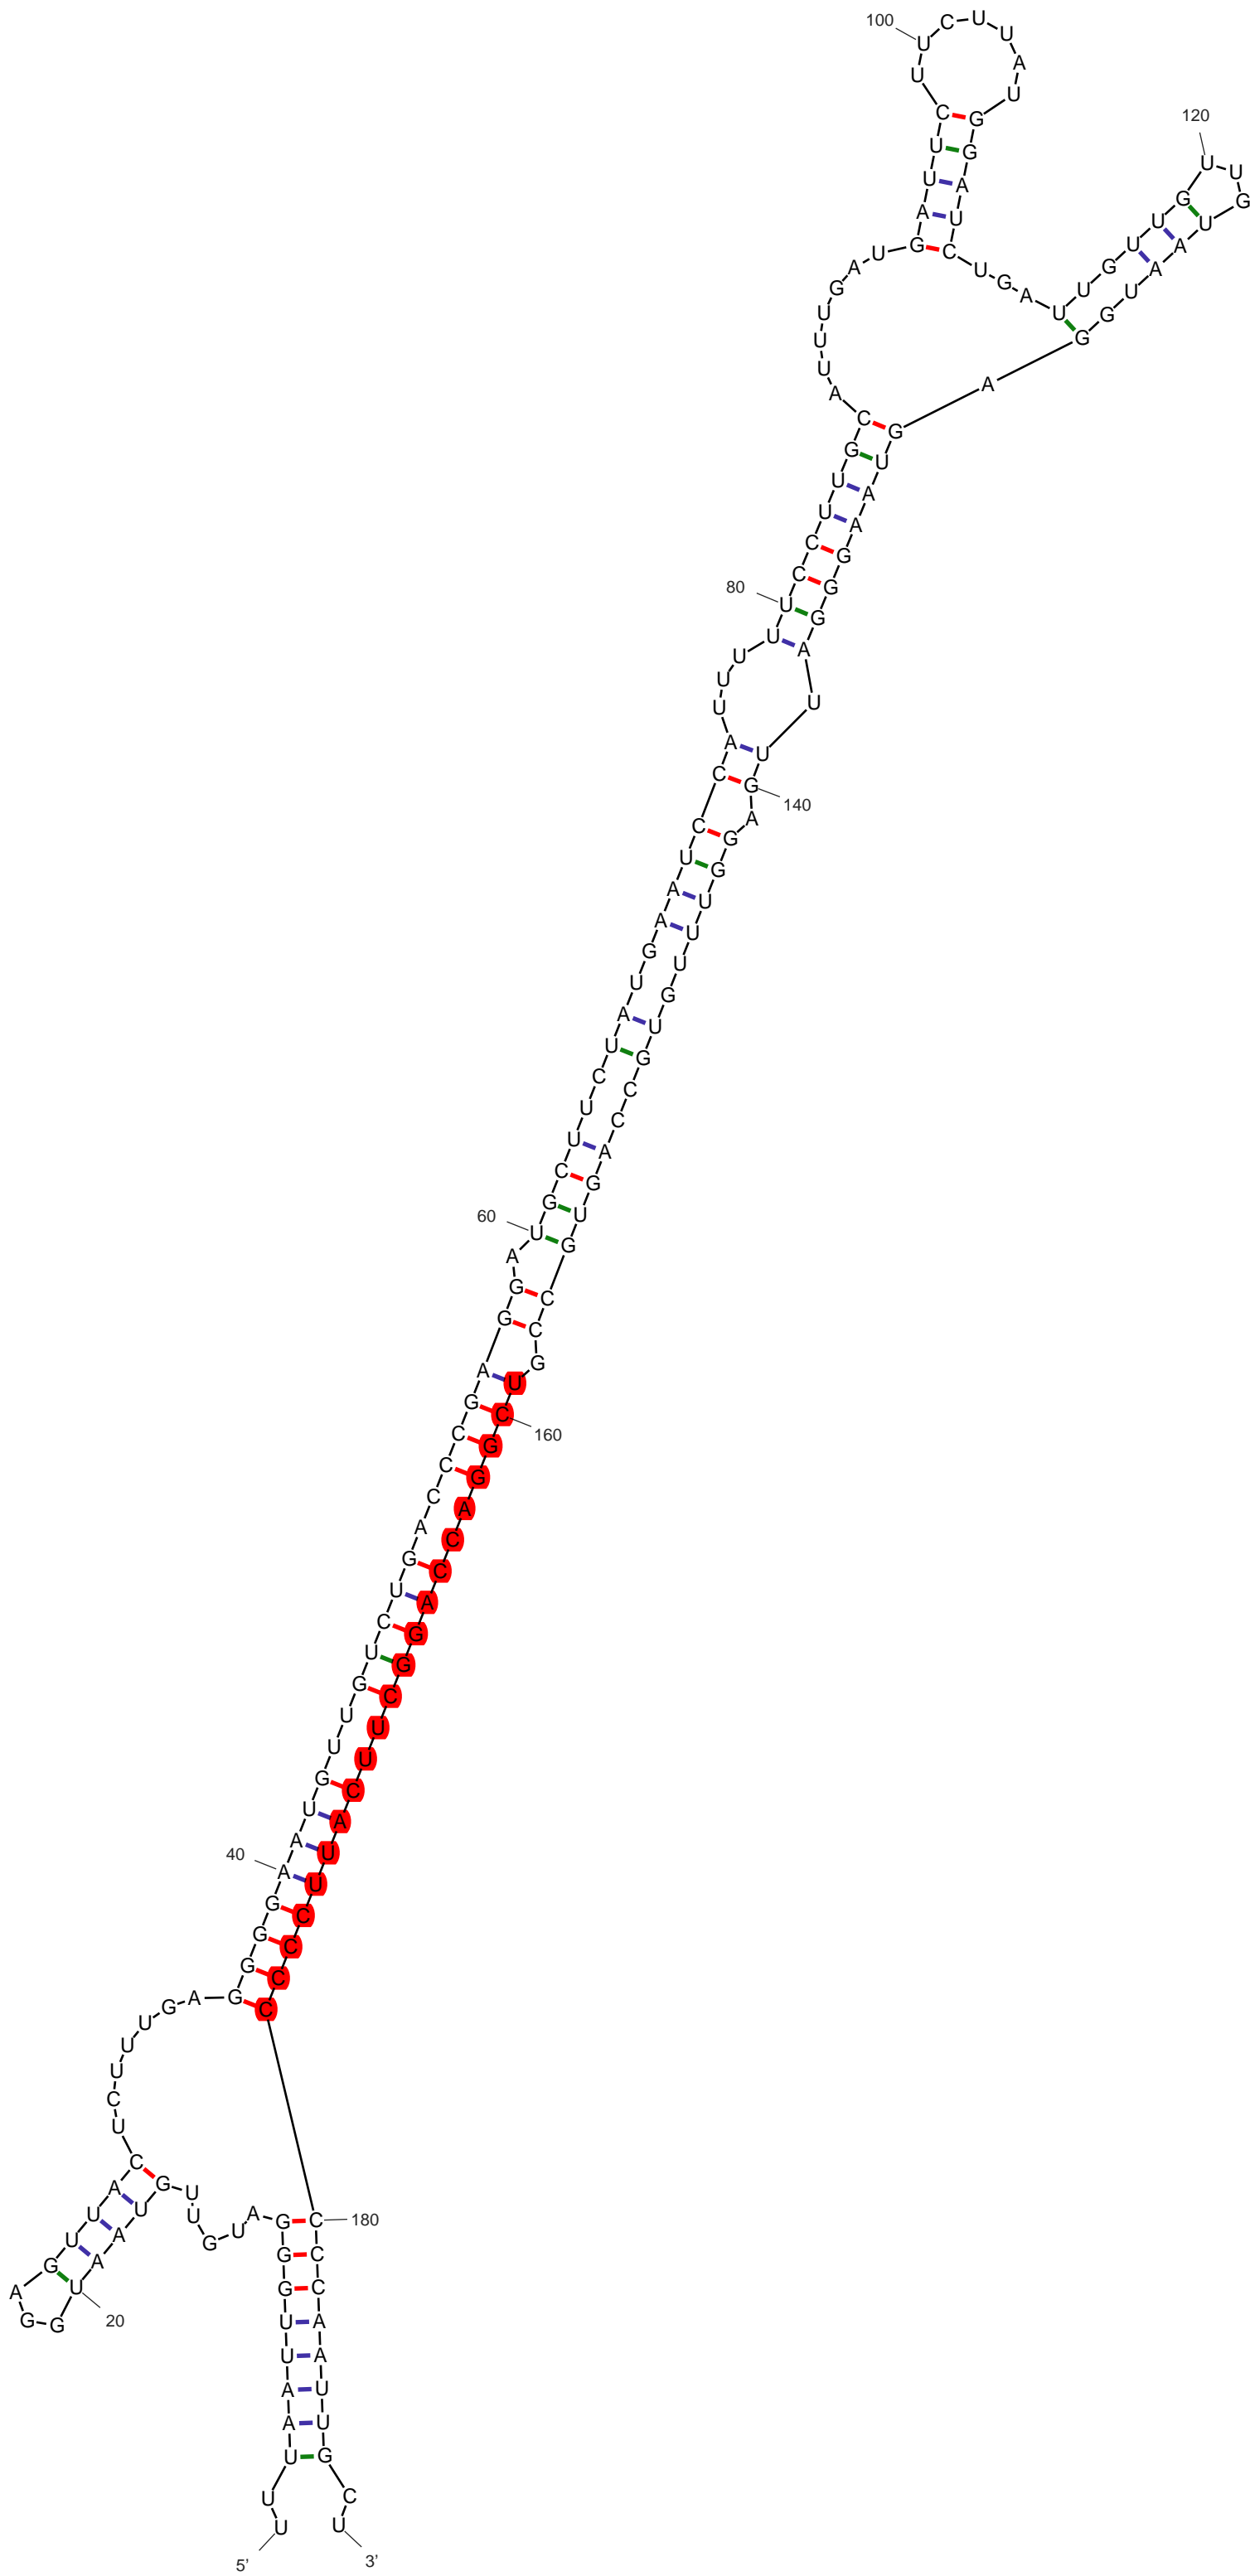

**$dG = -55.77$  [Initially  $-60.50$ ] 41-MIR166**

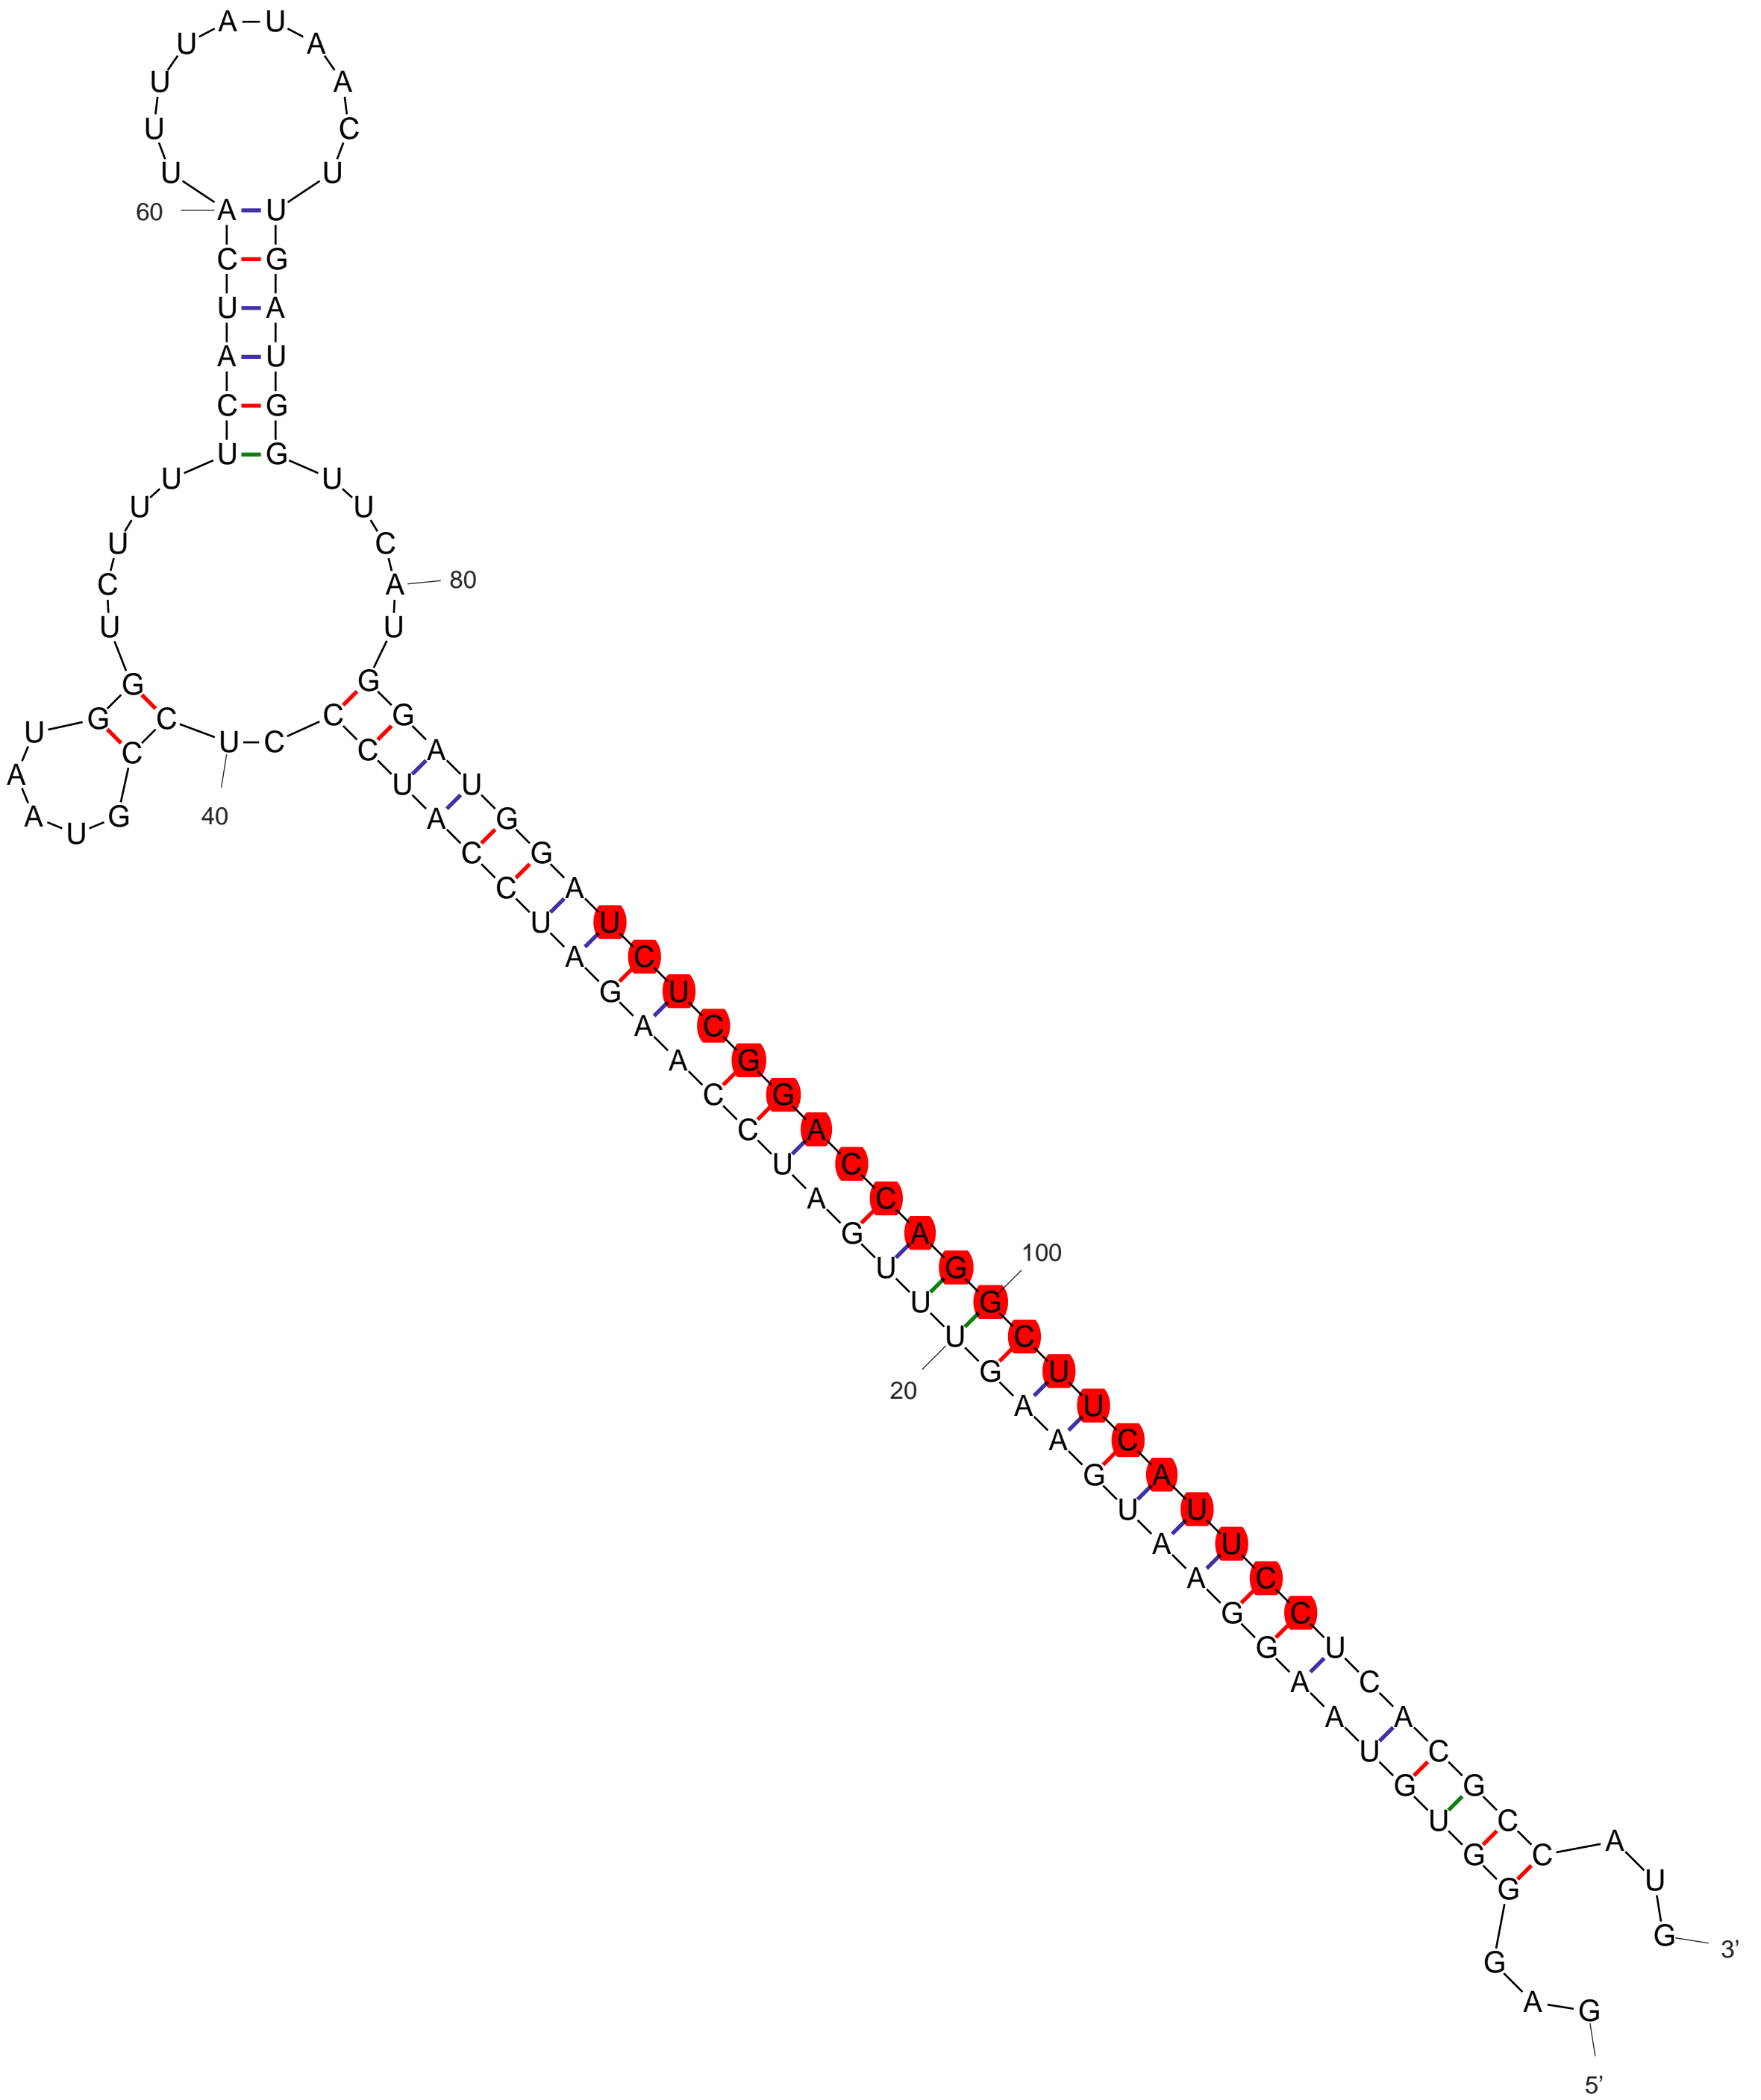

$dG = -52.34$  [Initially -55.90] 43-MIR166



dG = -52.34 [Initially -55.90] 44-MIR166

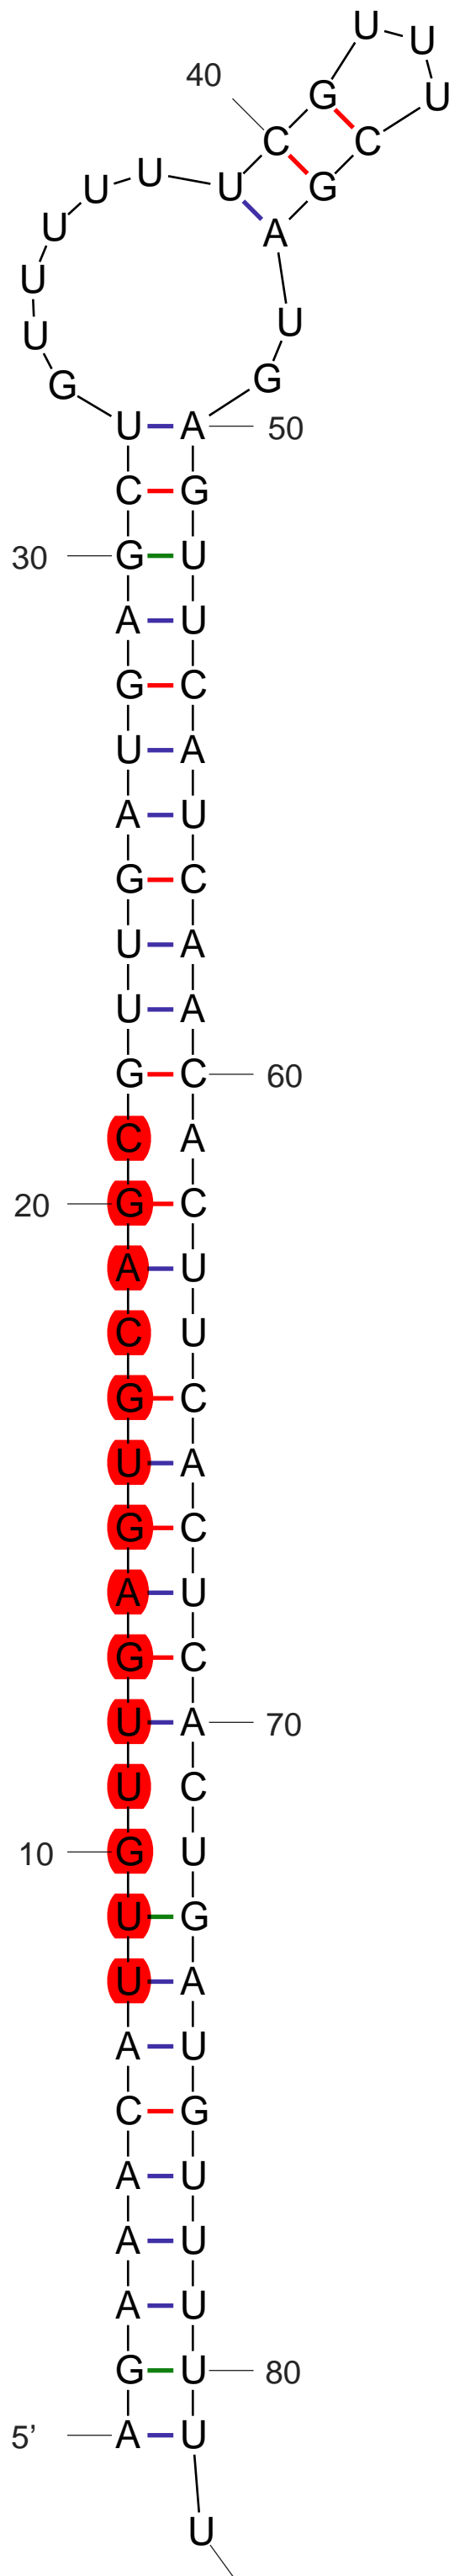

dG = -32.90 [Initially -32.90] 45-MIR397



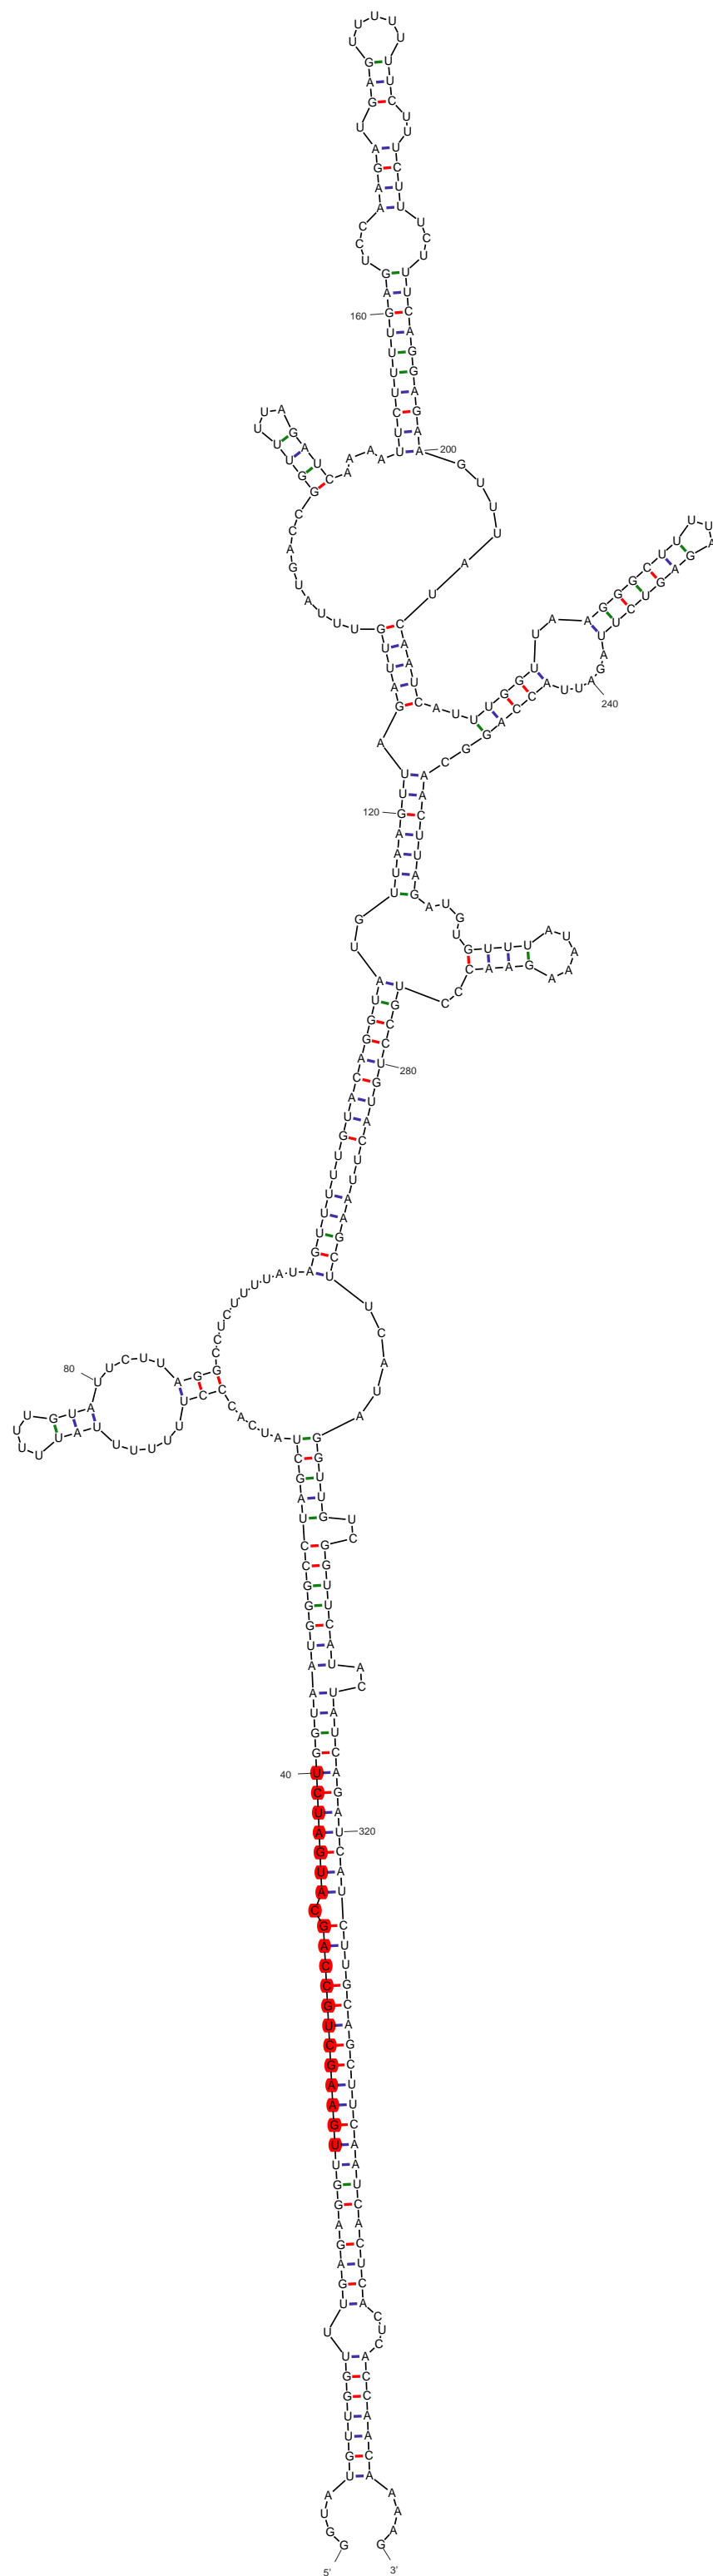

$dG = -96.79$  [Initially -110.00] 49-MIR167\_1





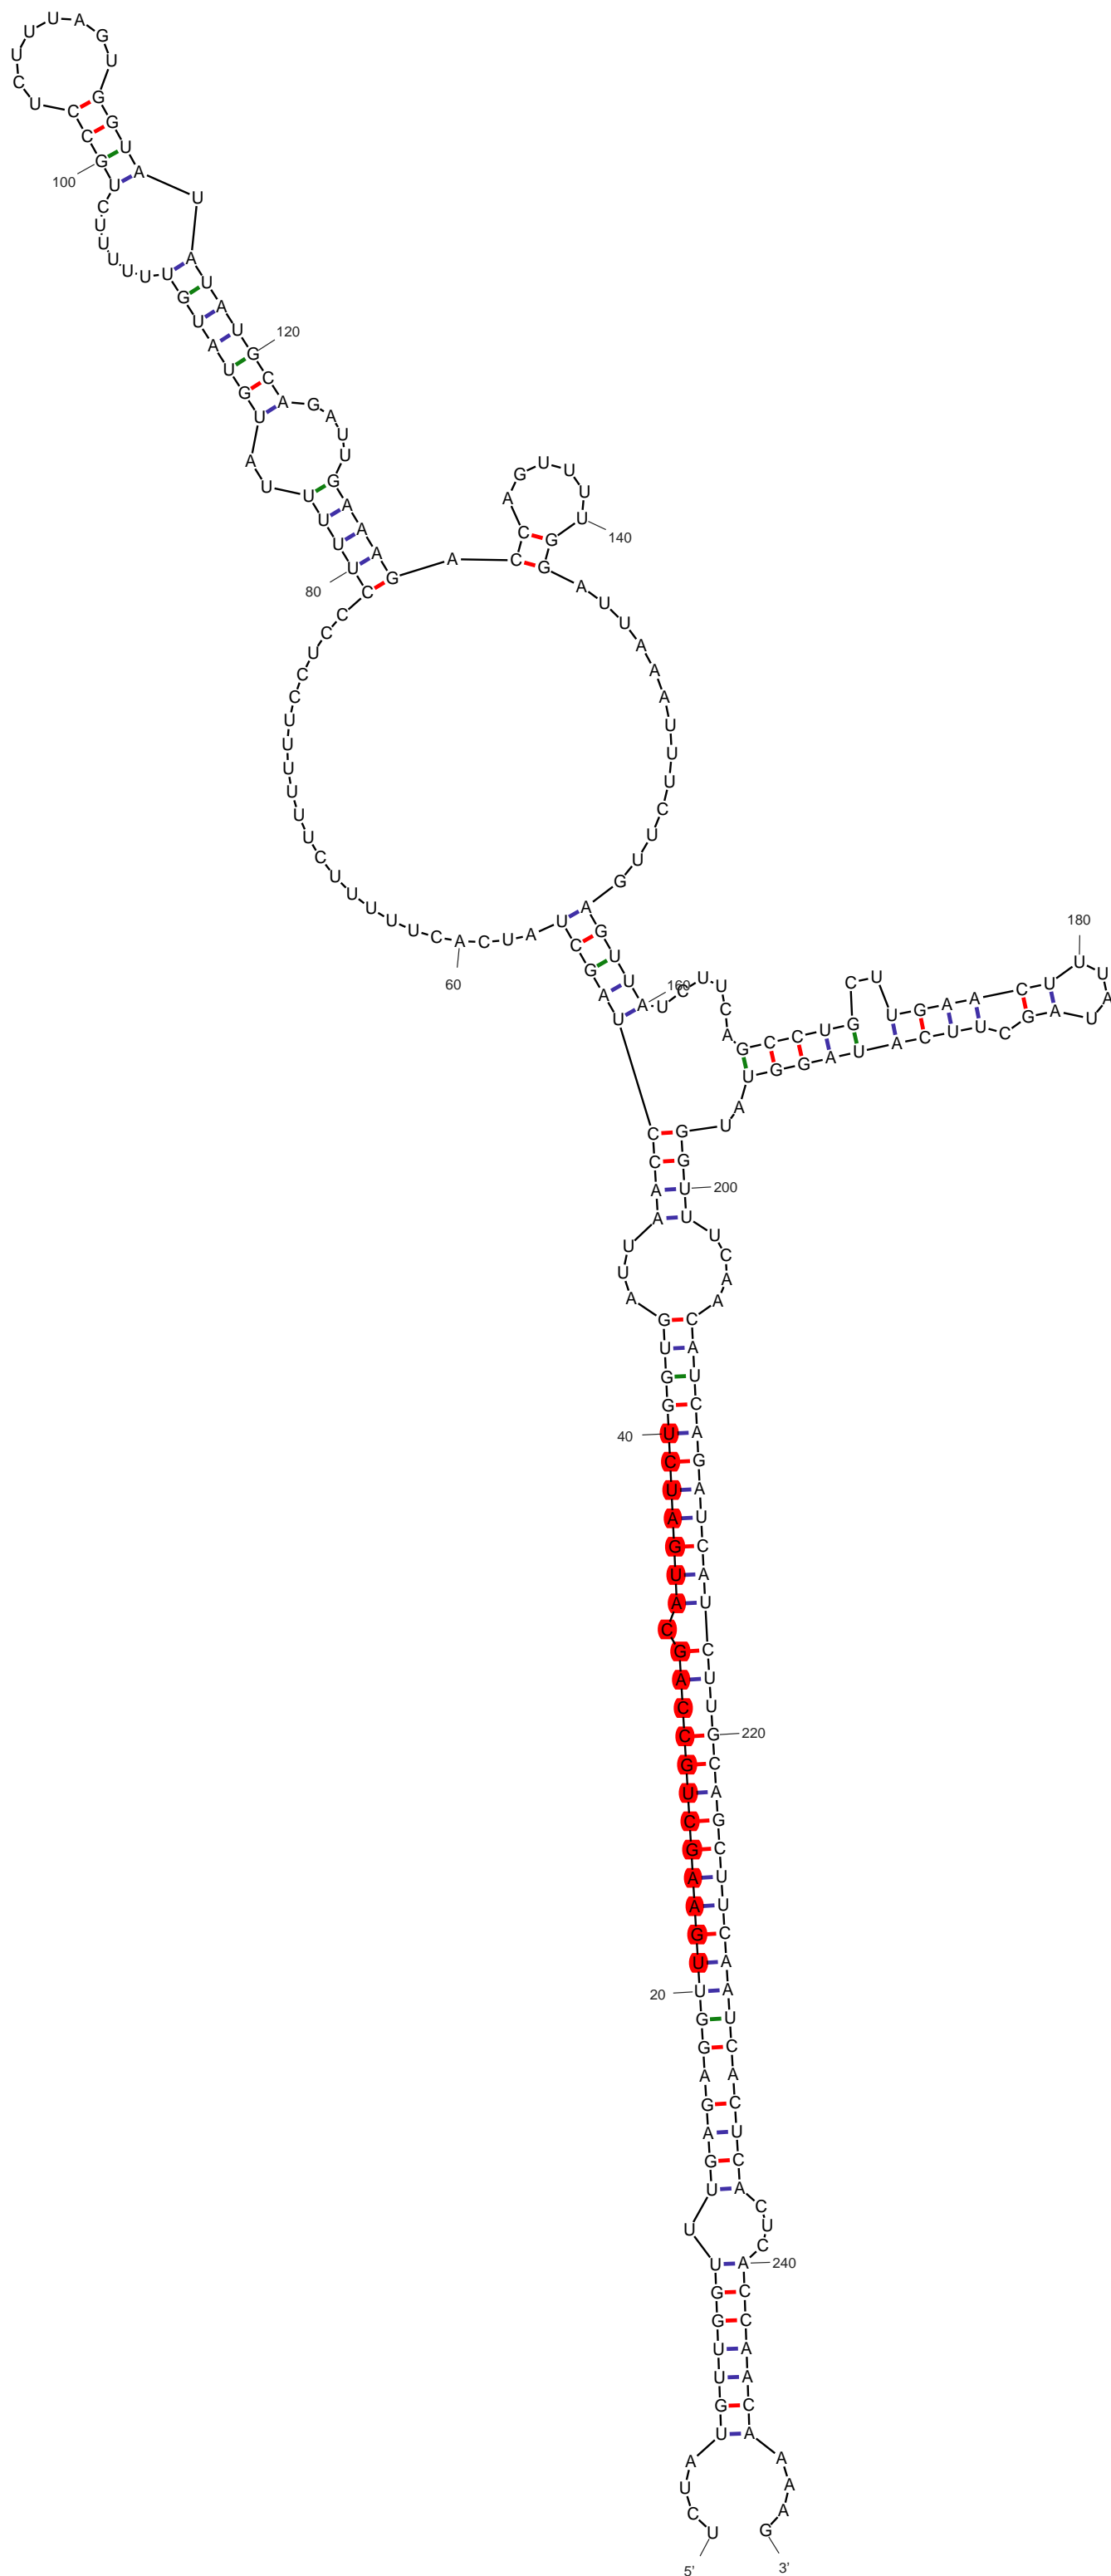

**dG = -69.31 [Initially -75.10] 51-MIR167\_1**

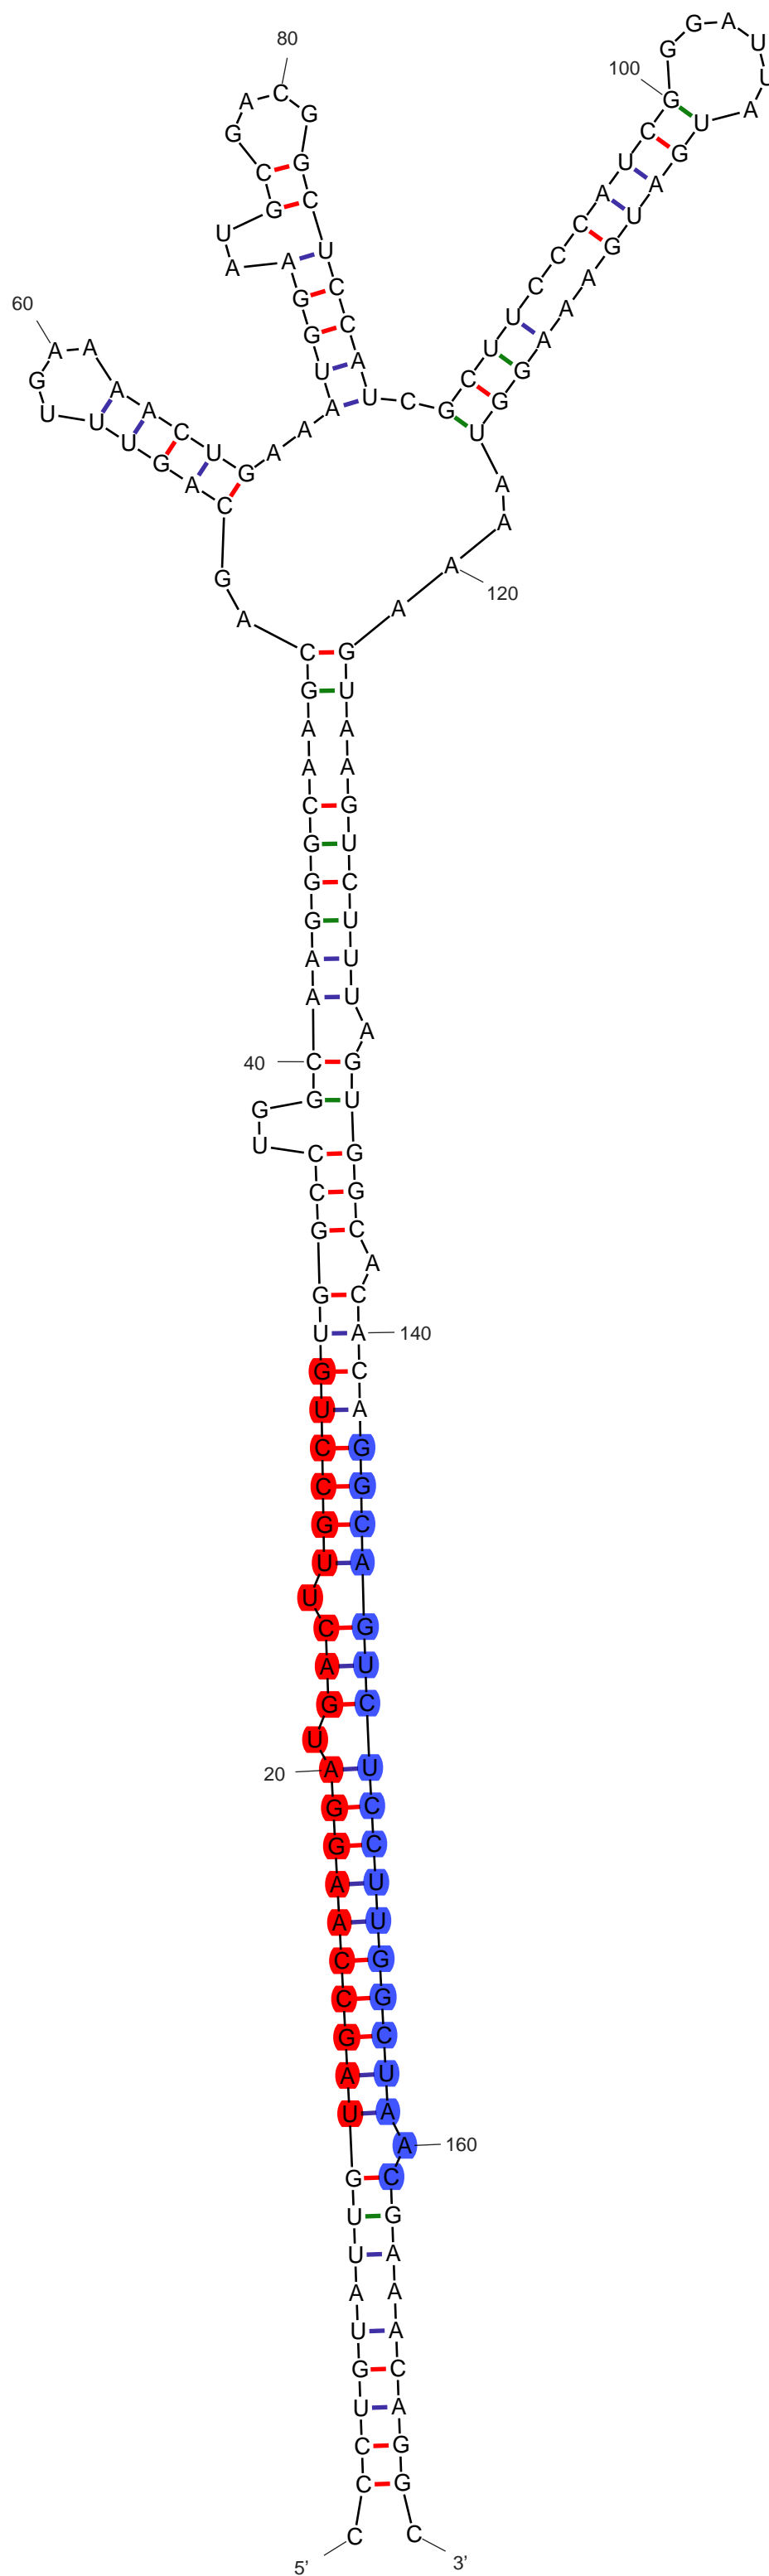

$dG = -71.95$  [Initially  $-72.80$ ] 52-MIR169\_1

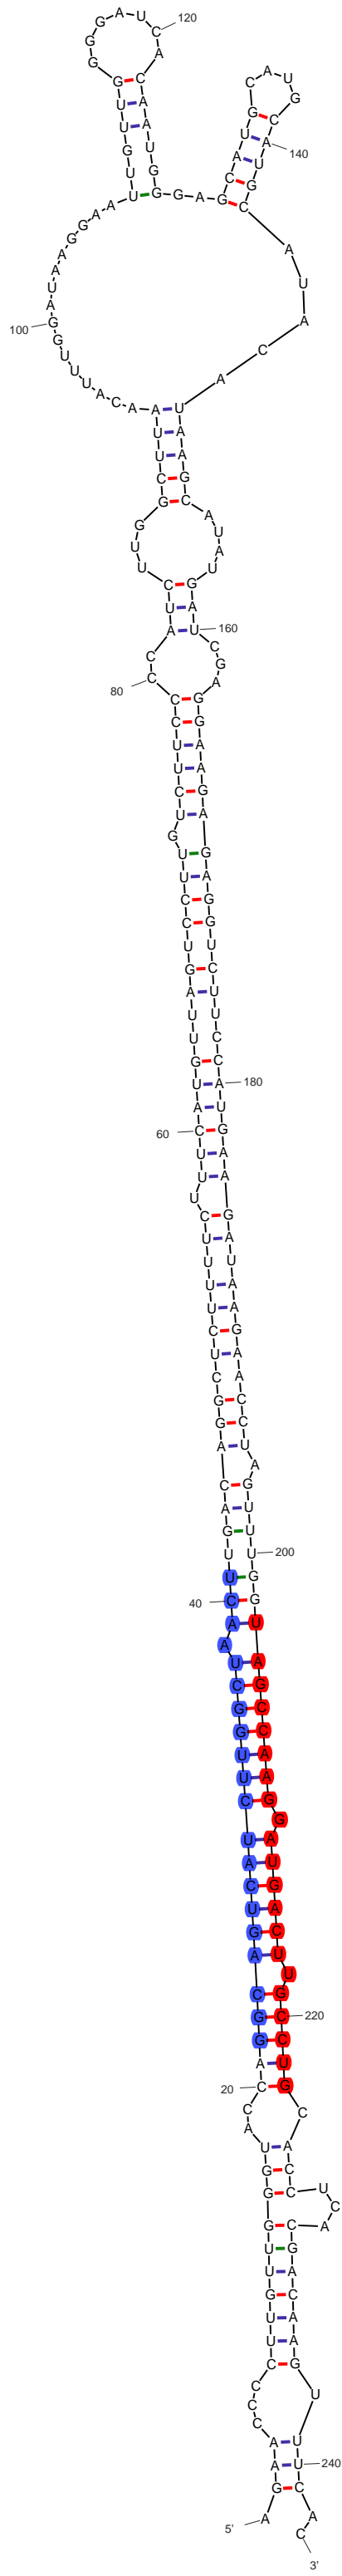

$dG = -88.22$  [Initially  $-92.80$ ] 53\_MIR169\_1

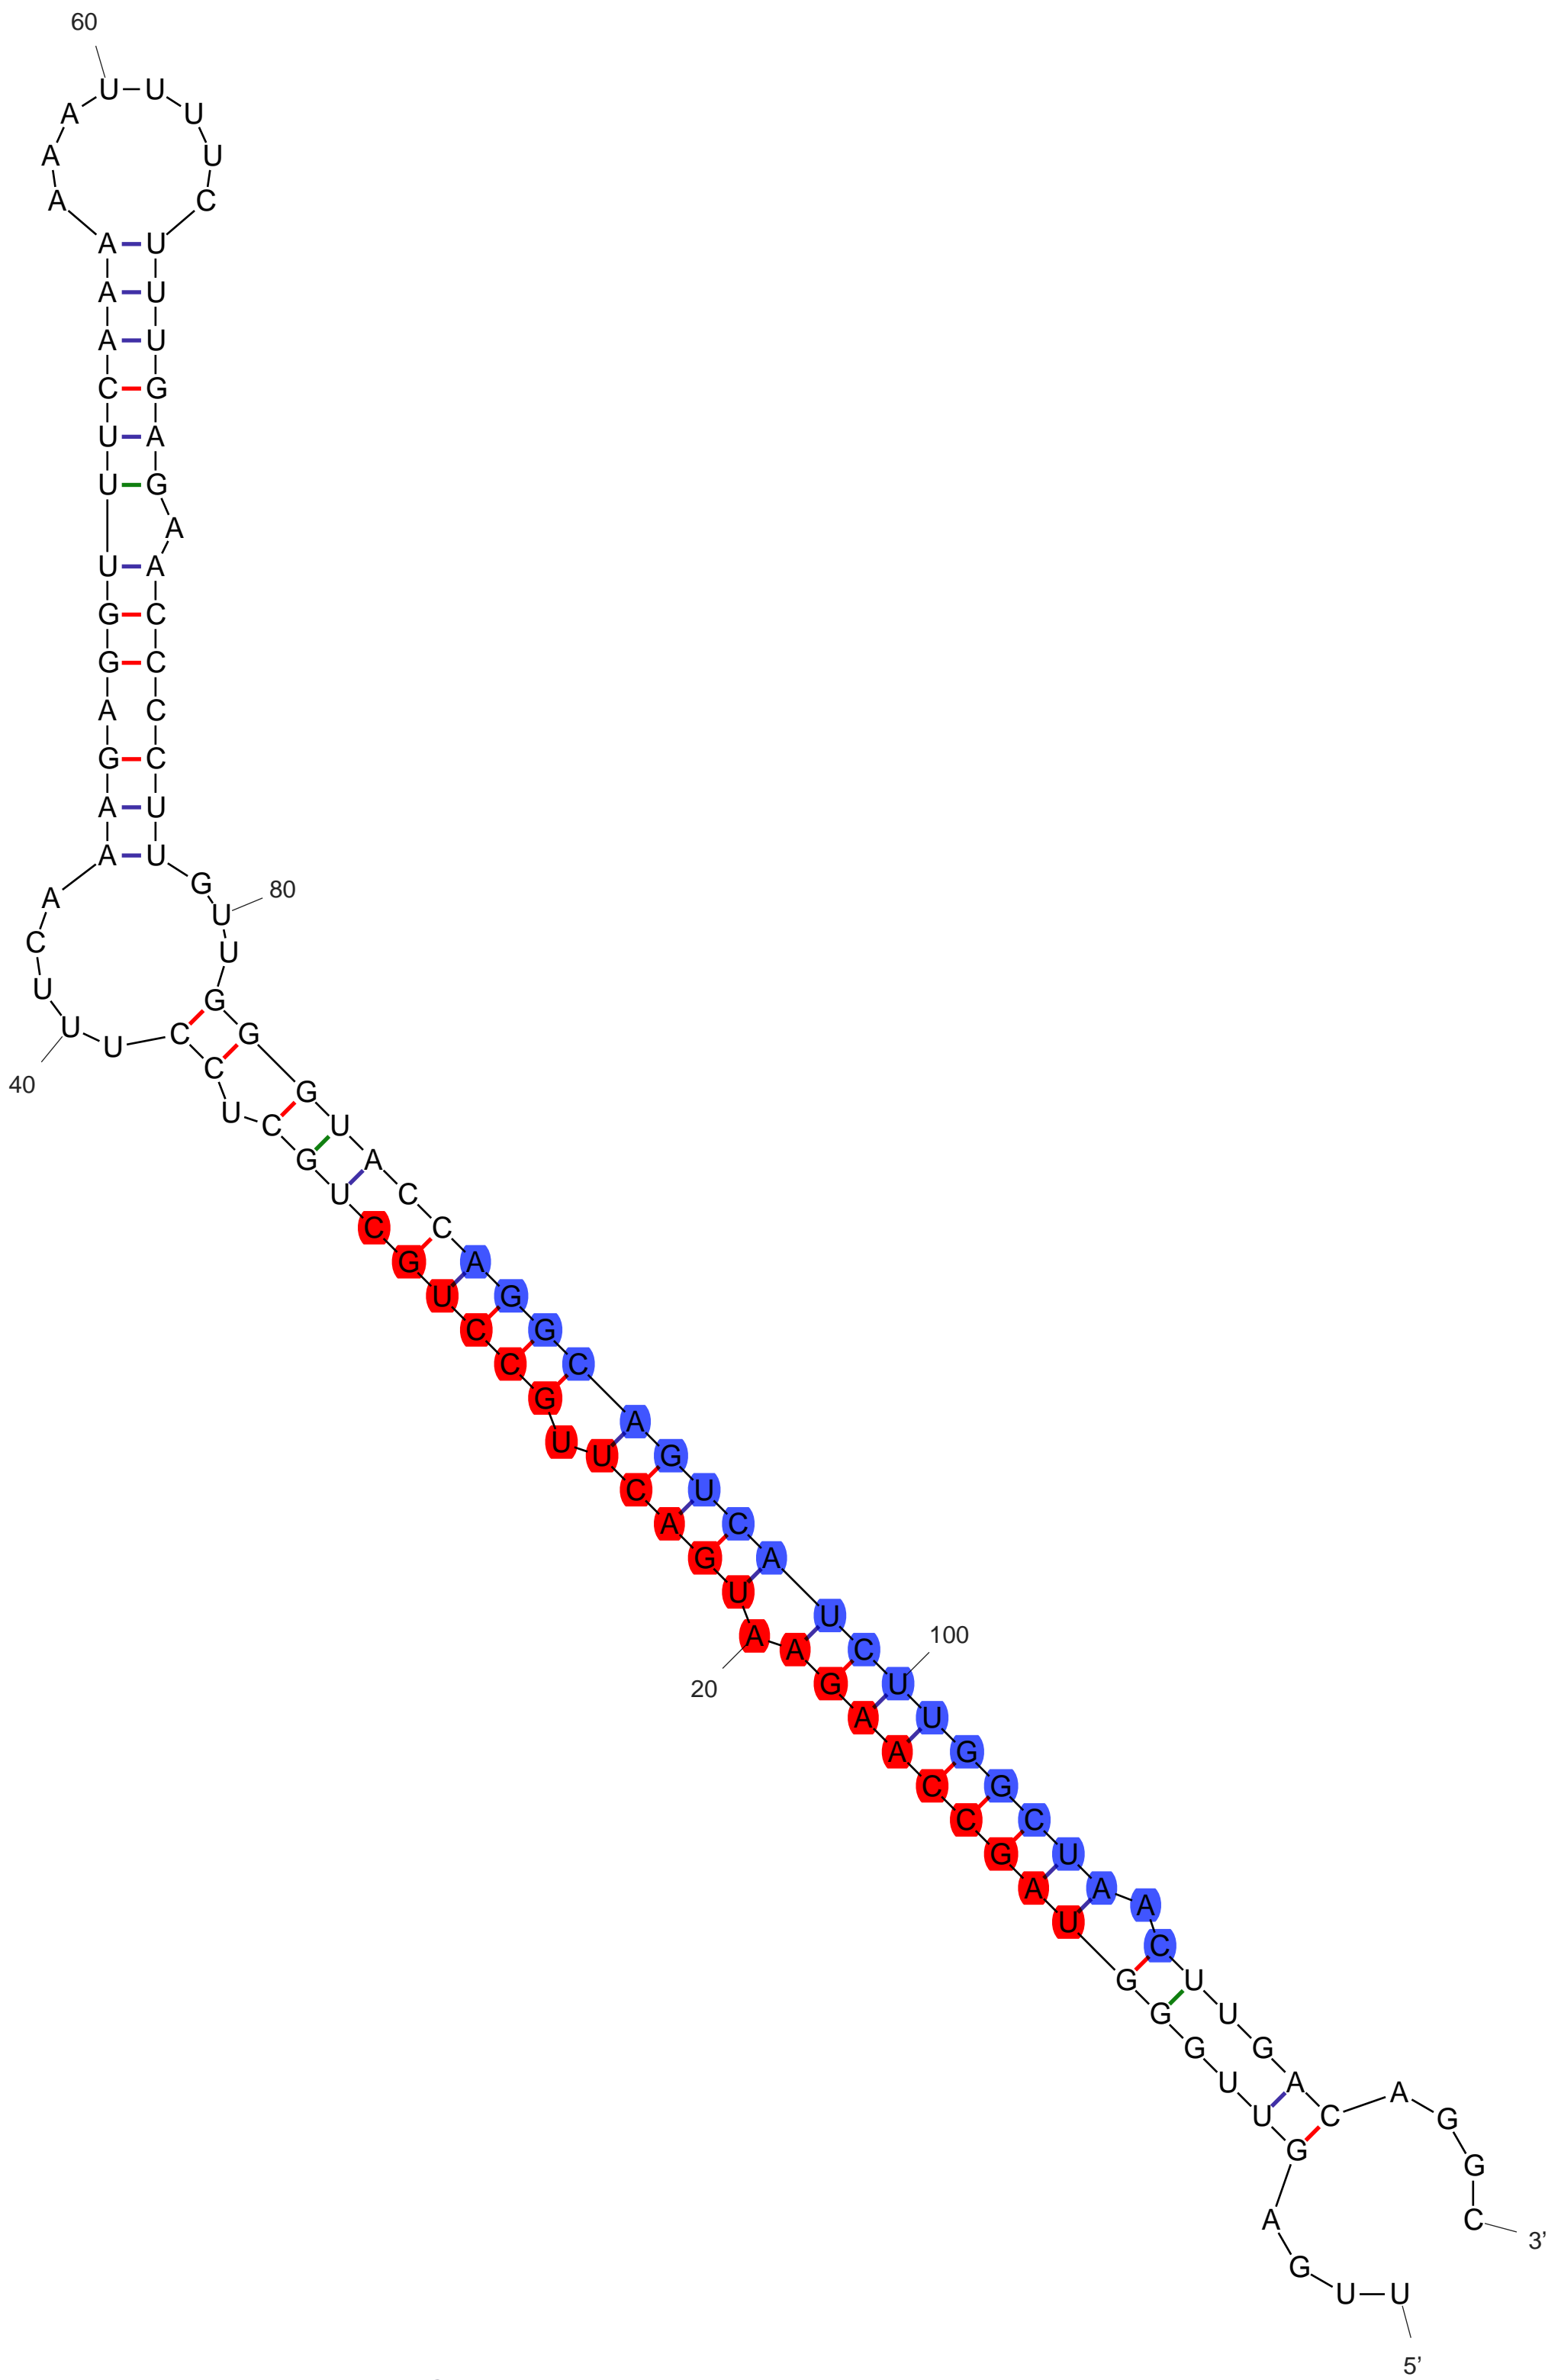

$dG = -50.90$  [Initially -50.90] 54-MIR169\_1





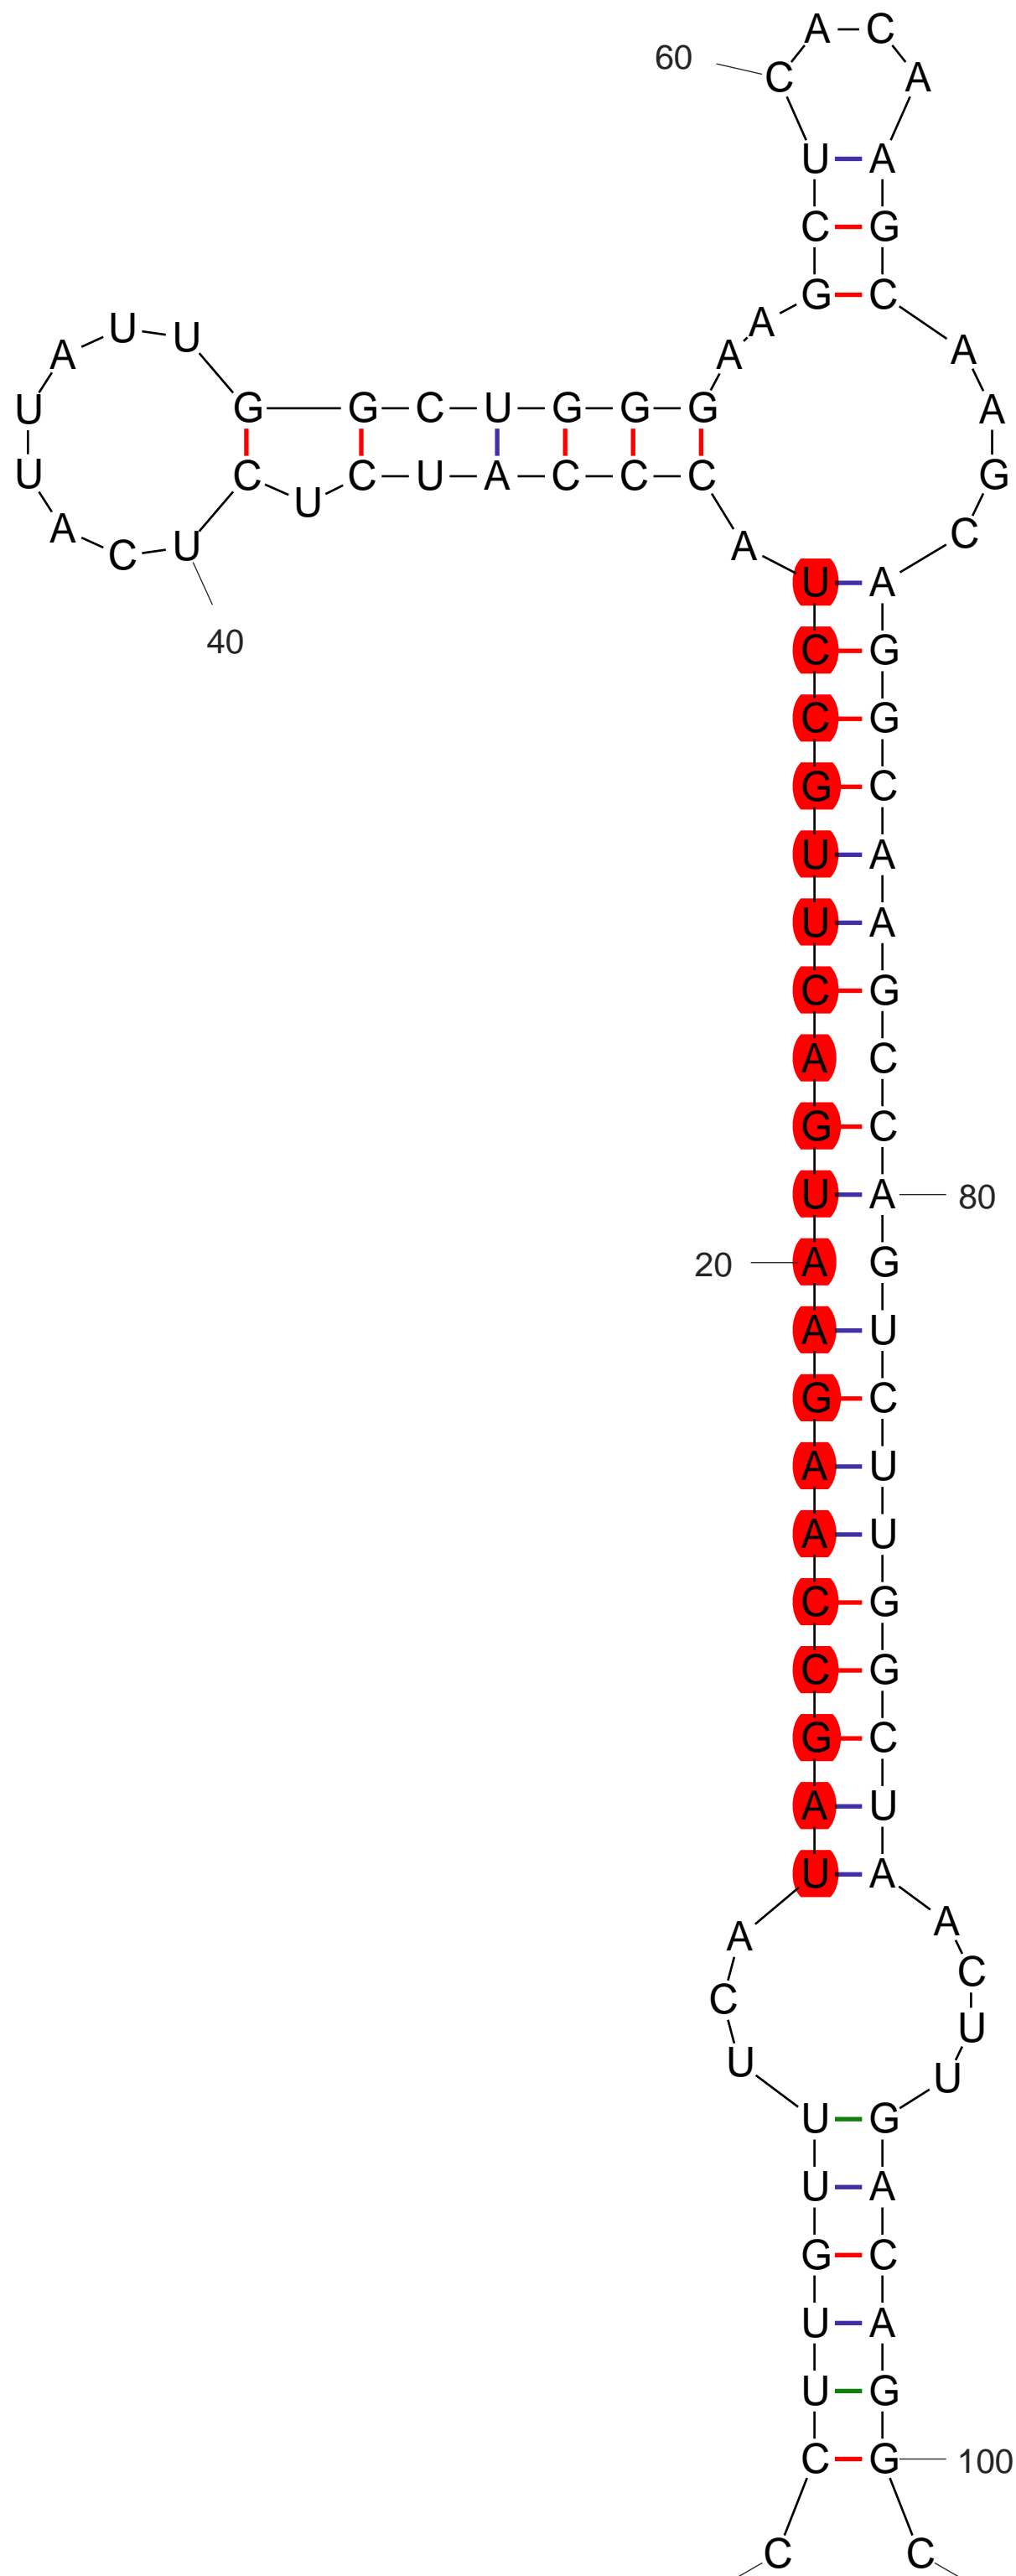

$dG = -36.73$  [Initially -39.60] 57-MIR169\_1





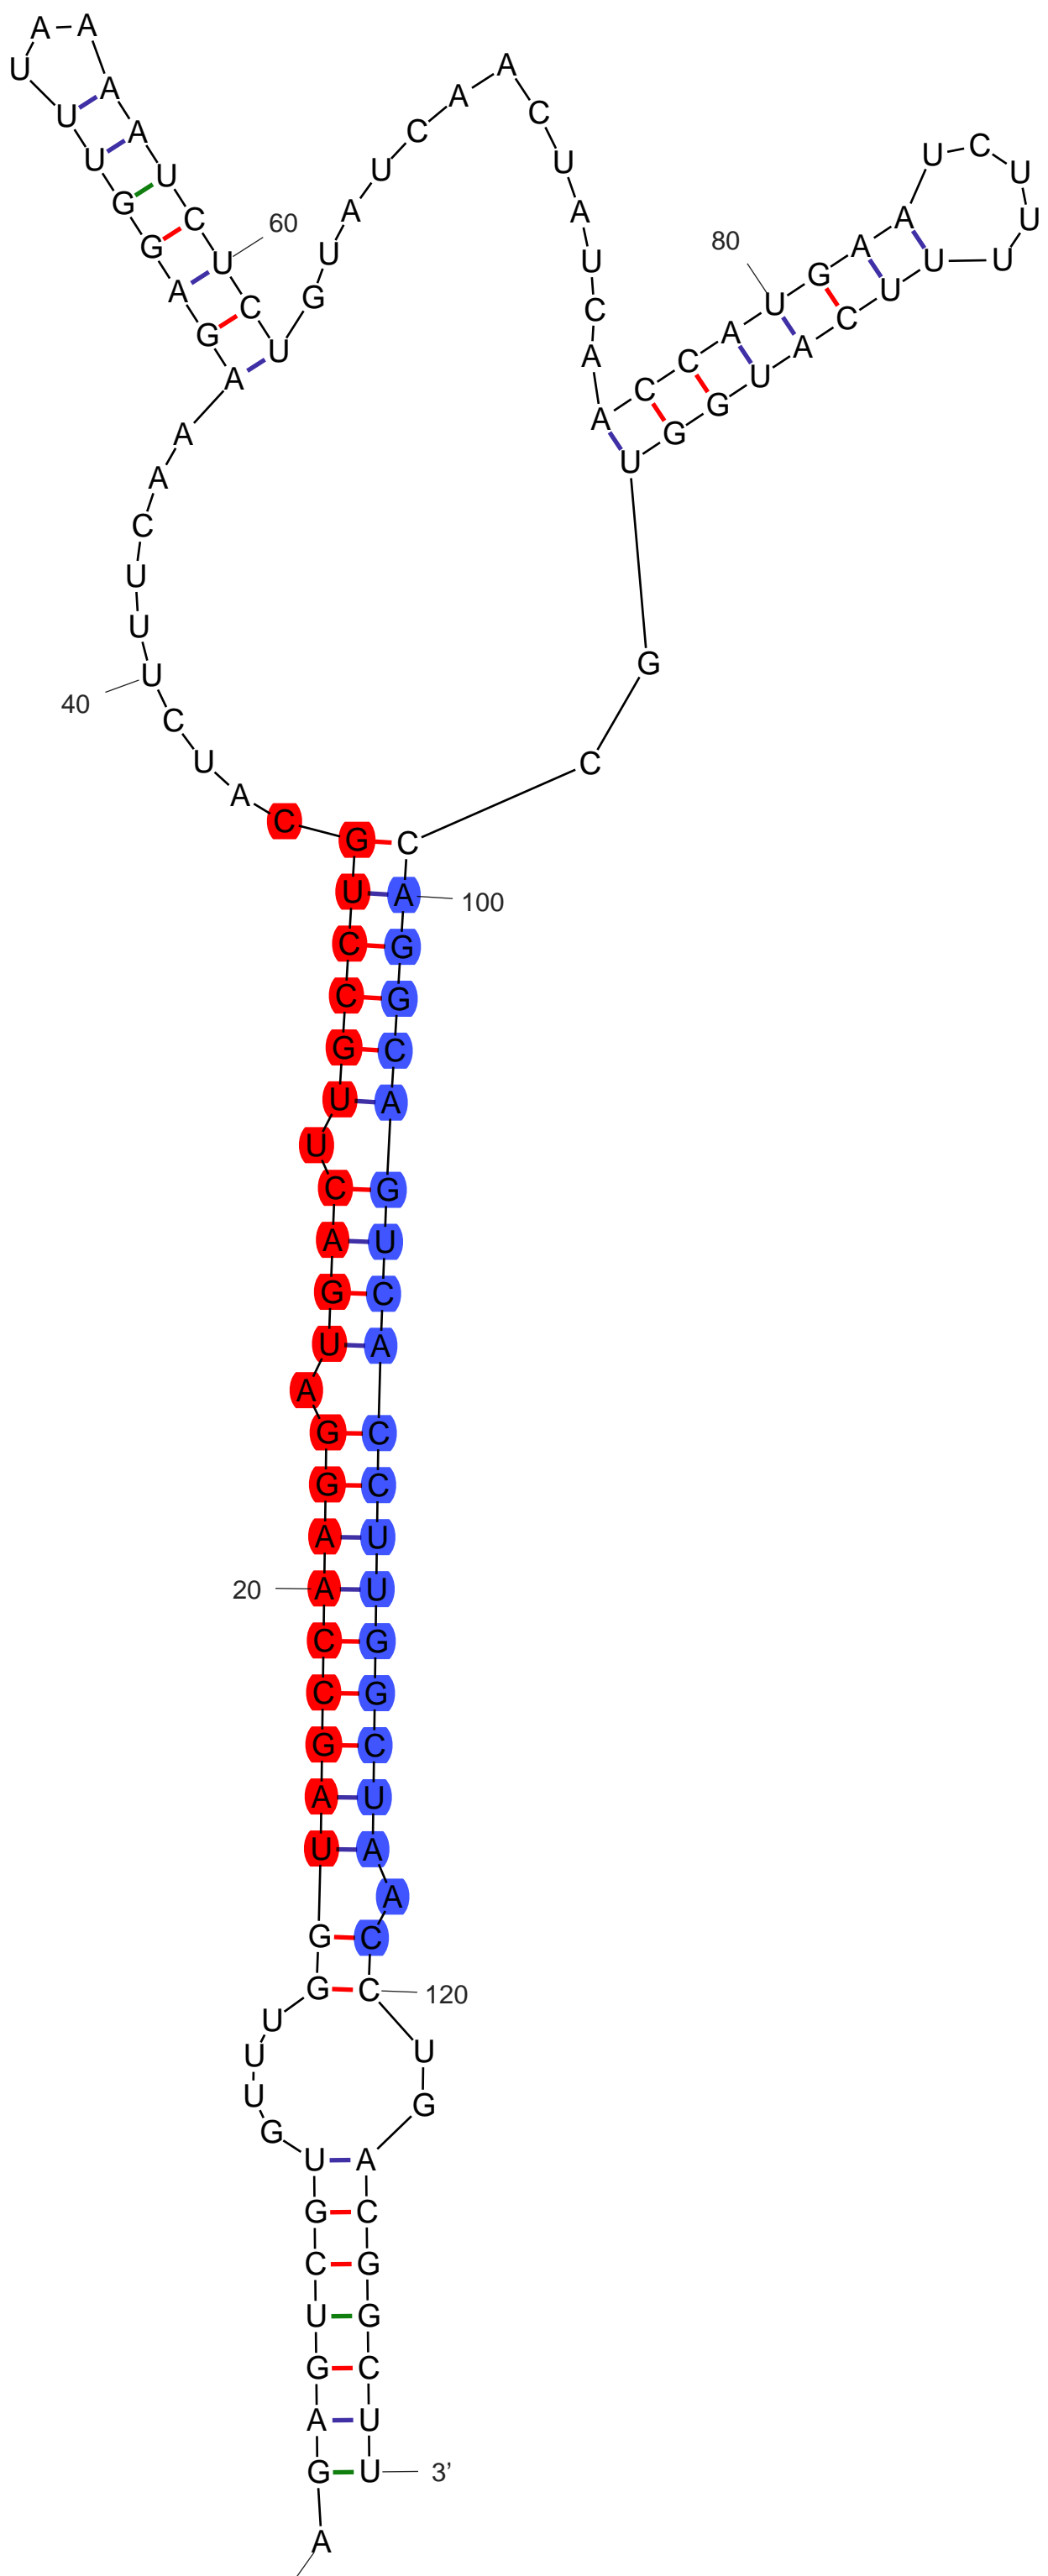

5' dG = -52.13 [Initially -56.30] 59-MIR169\_1

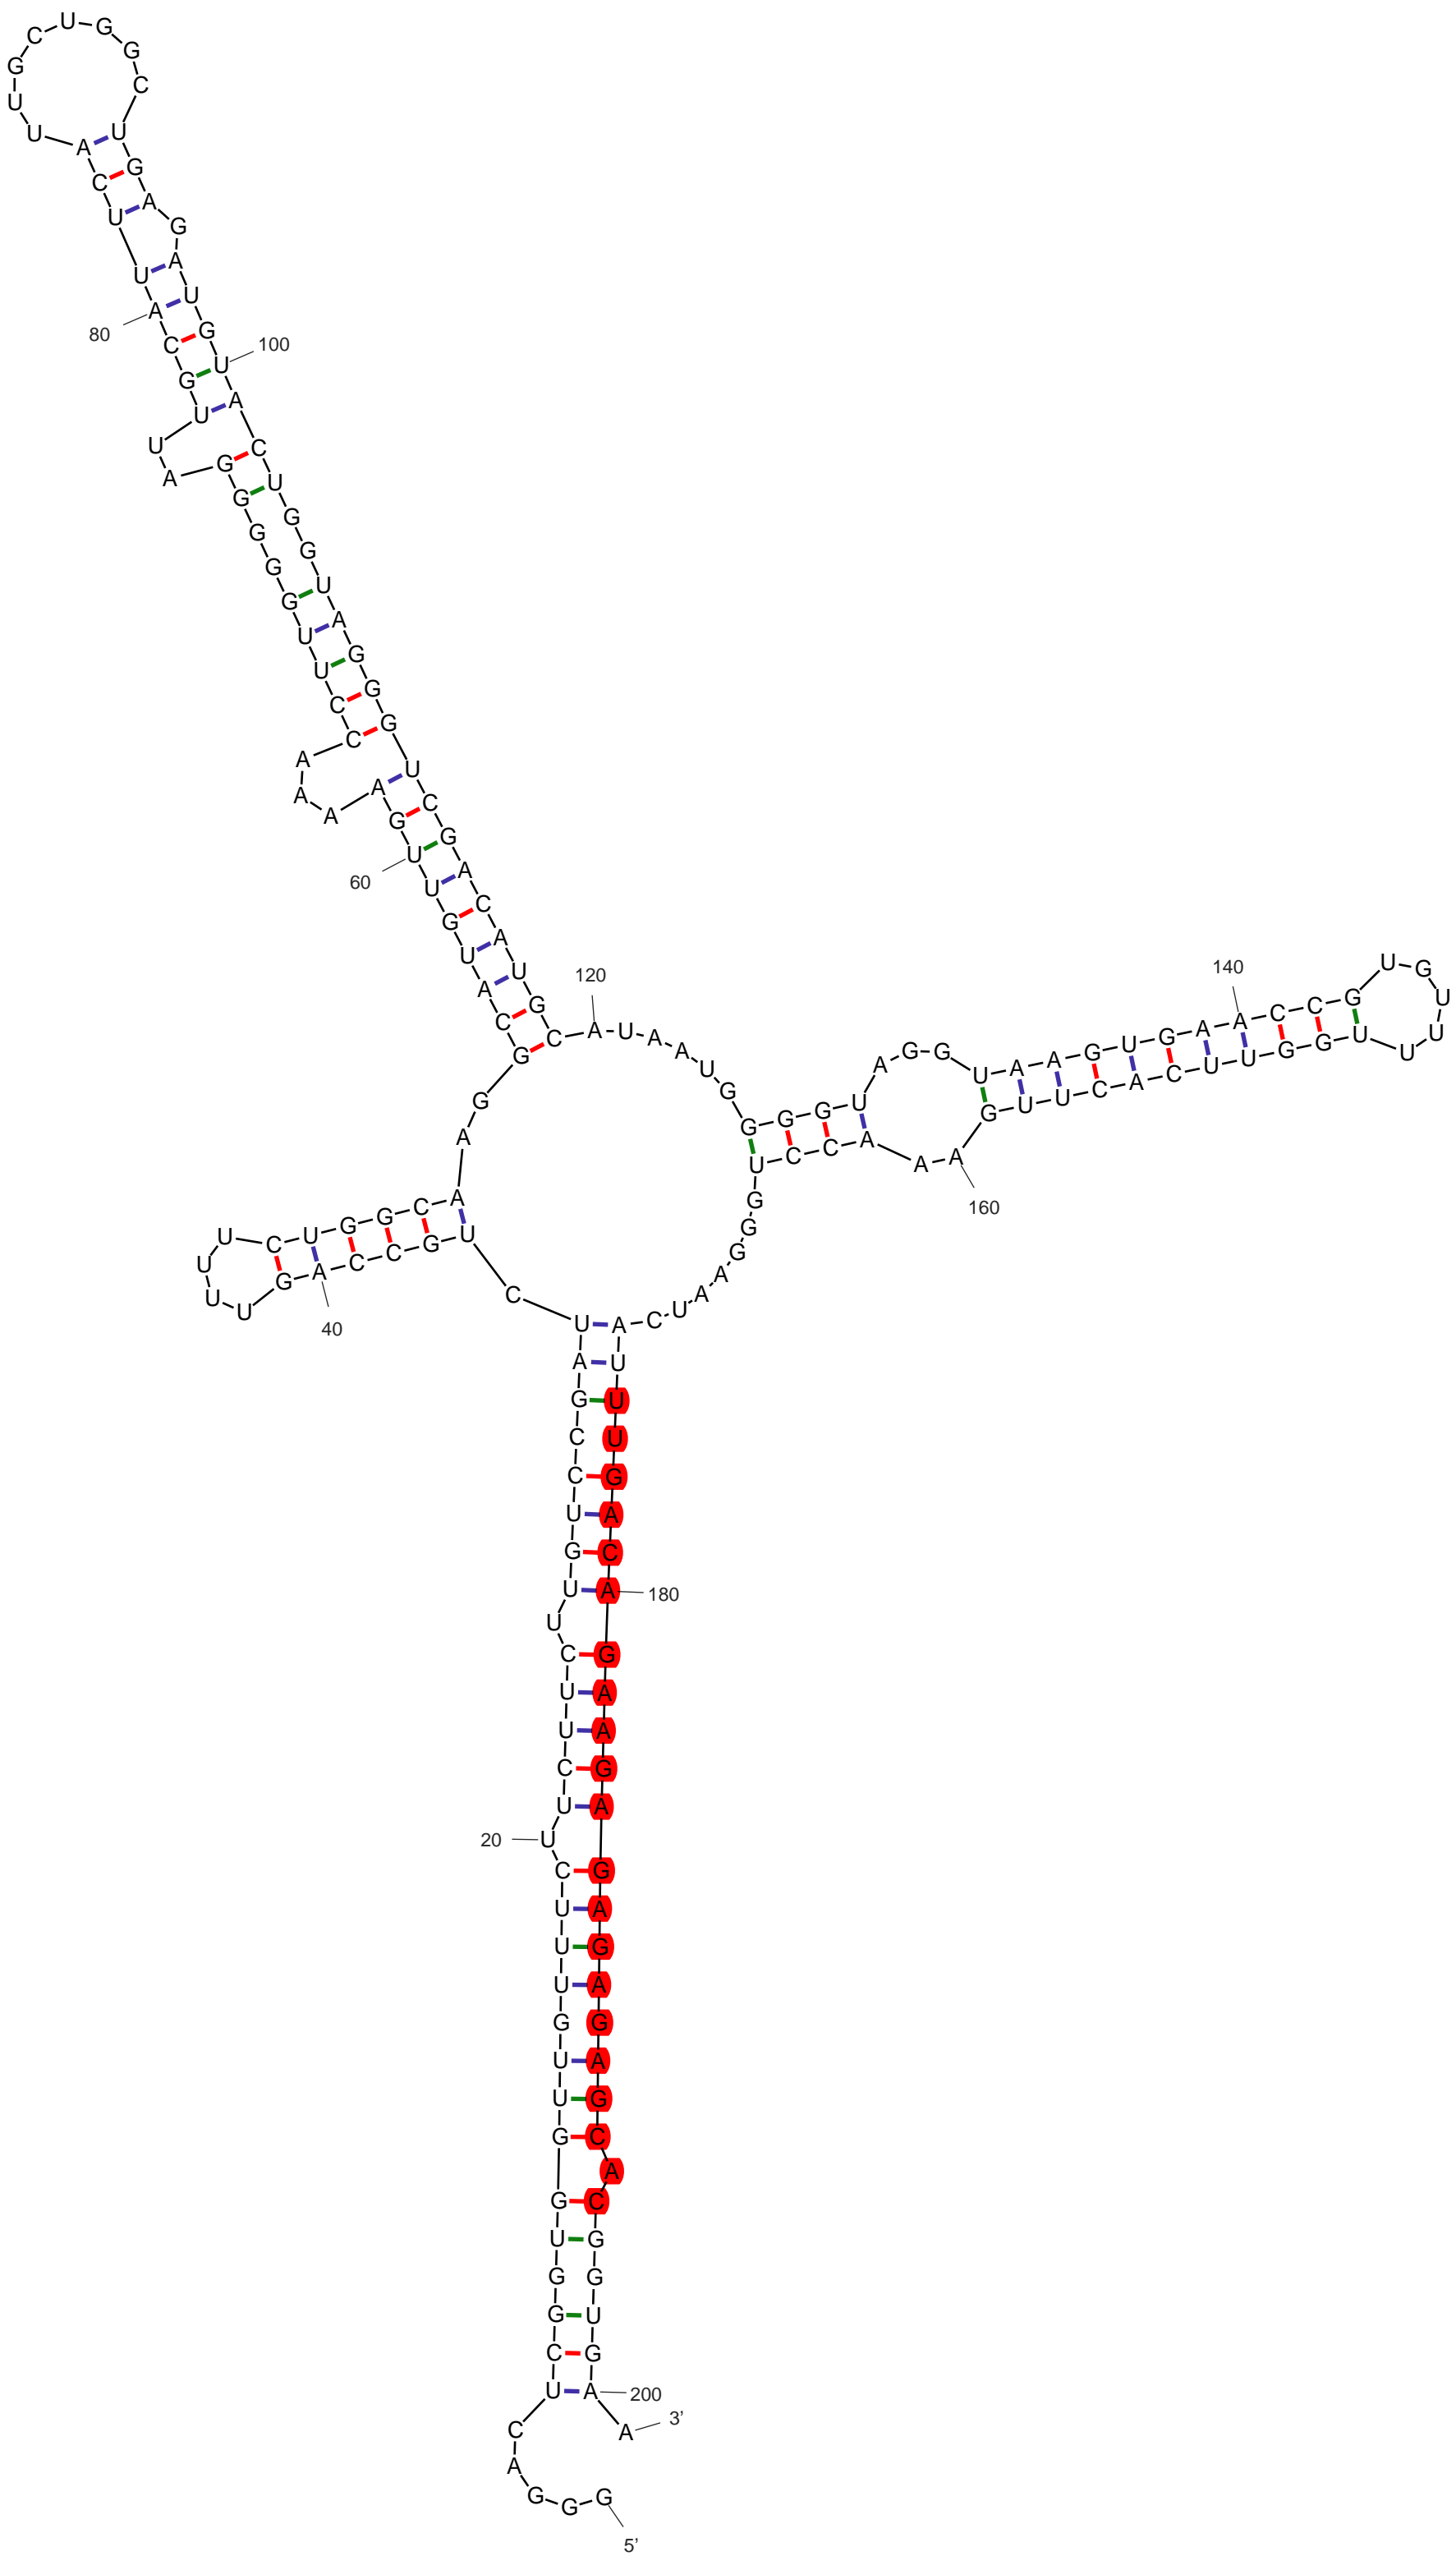

**dG = -69.62 [Initially -70.80] 5-MIR156**

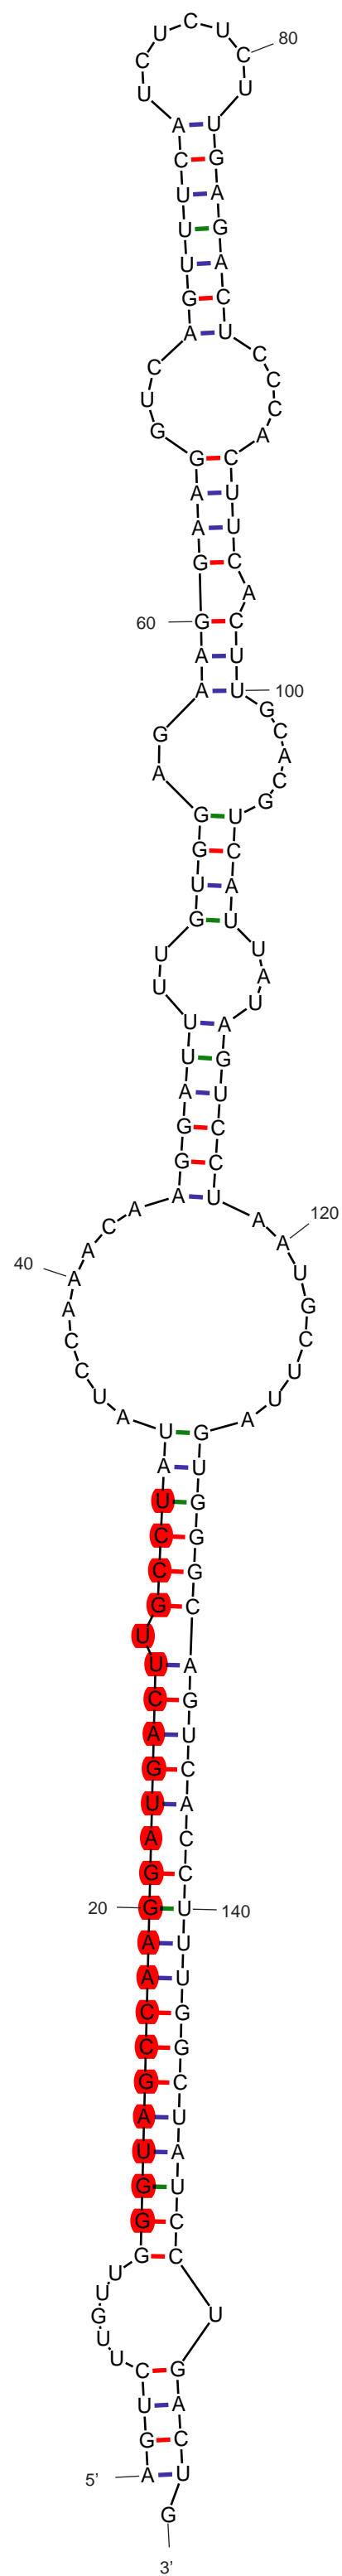

$dG = -57.10$  [Initially  $-57.10$ ] 62-MIR169\_2

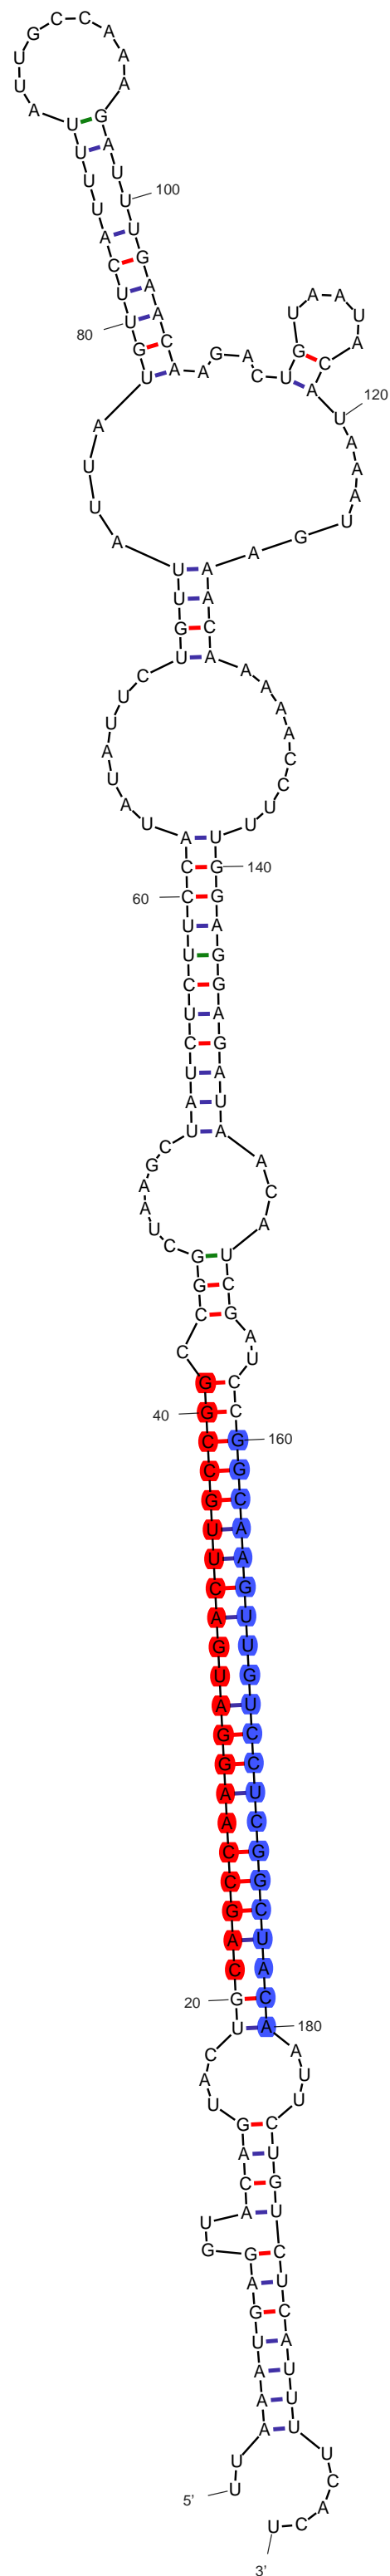

$dG = -62.39$  [Initially -65.90] 63-MIR169\_2



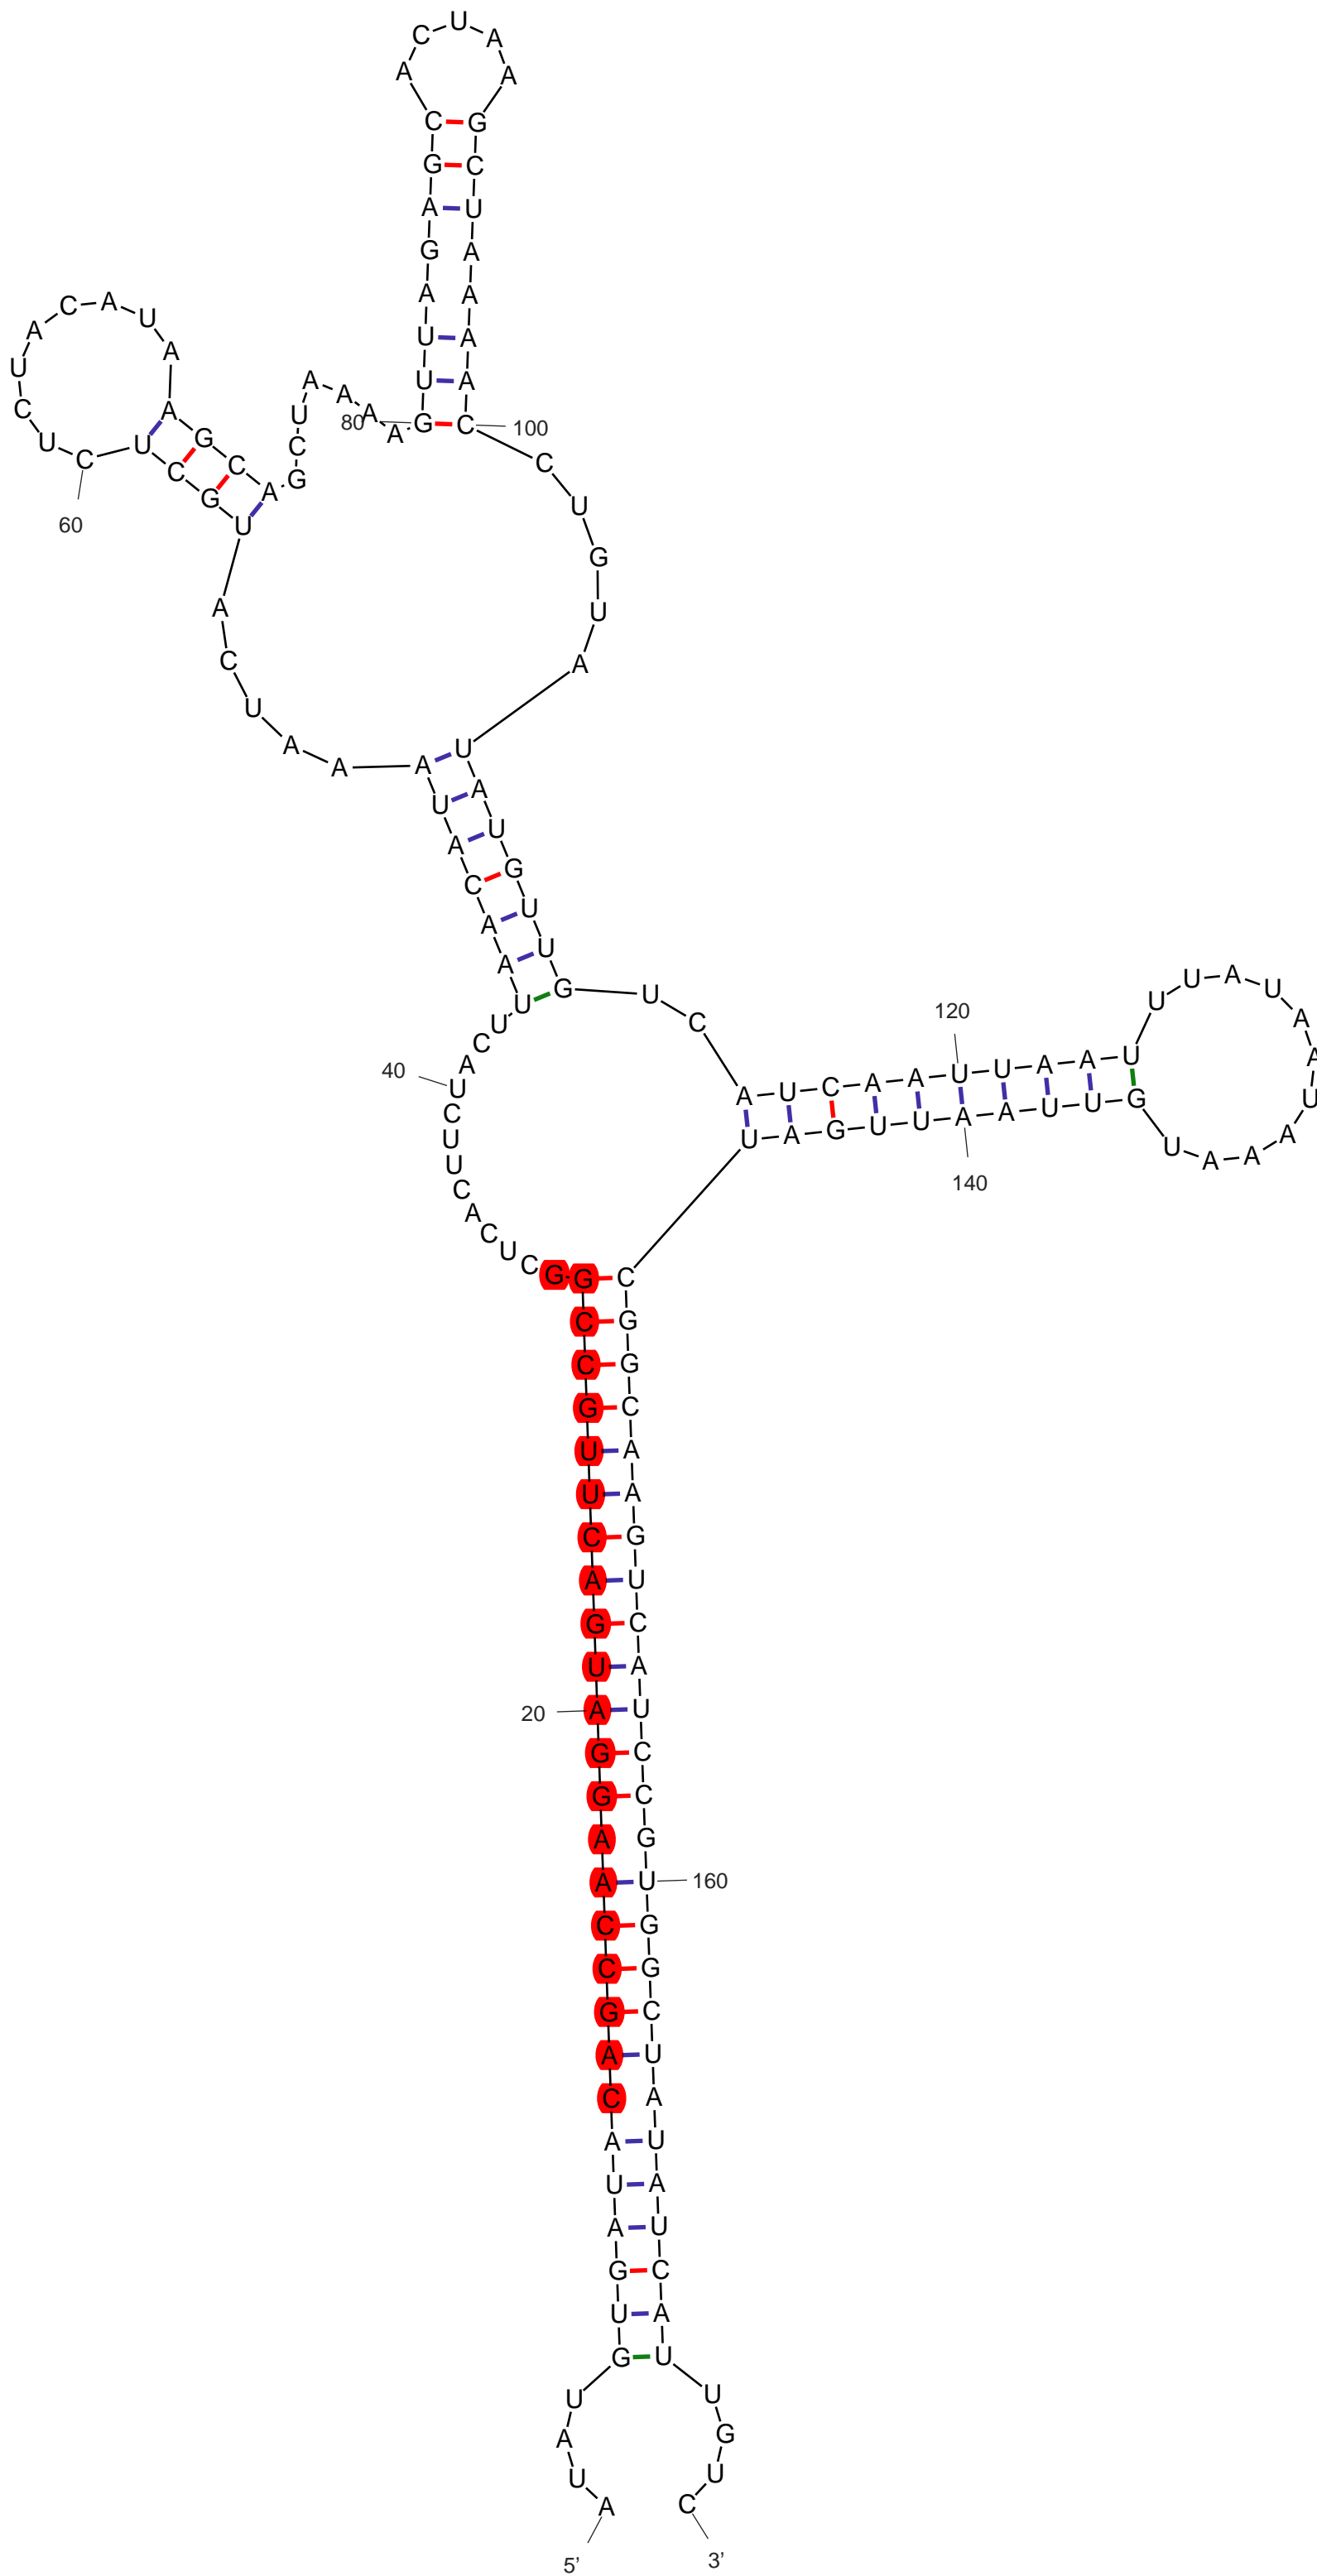

$dG = -50.34$  [Initially  $-57.40$ ] 65-MIR169\_2

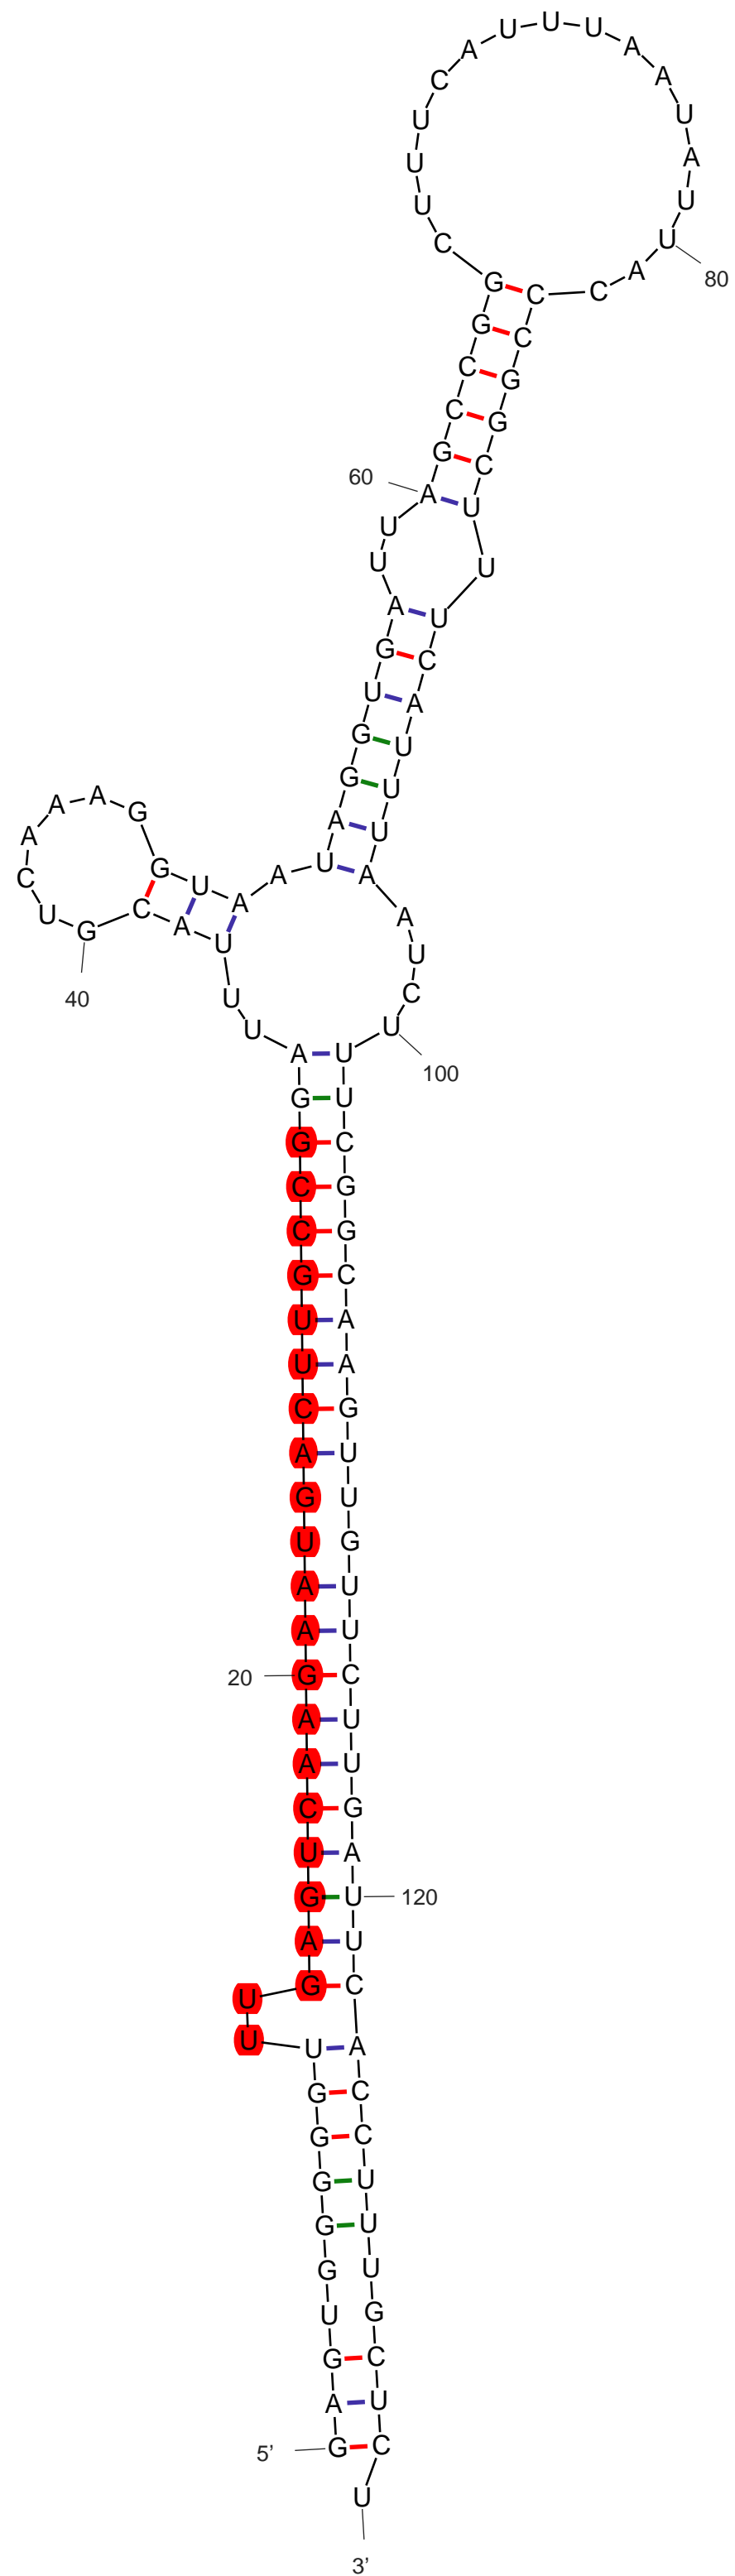

$dG = -58.83$  [Initially  $-60.70$ ] 66-MIR169\_2



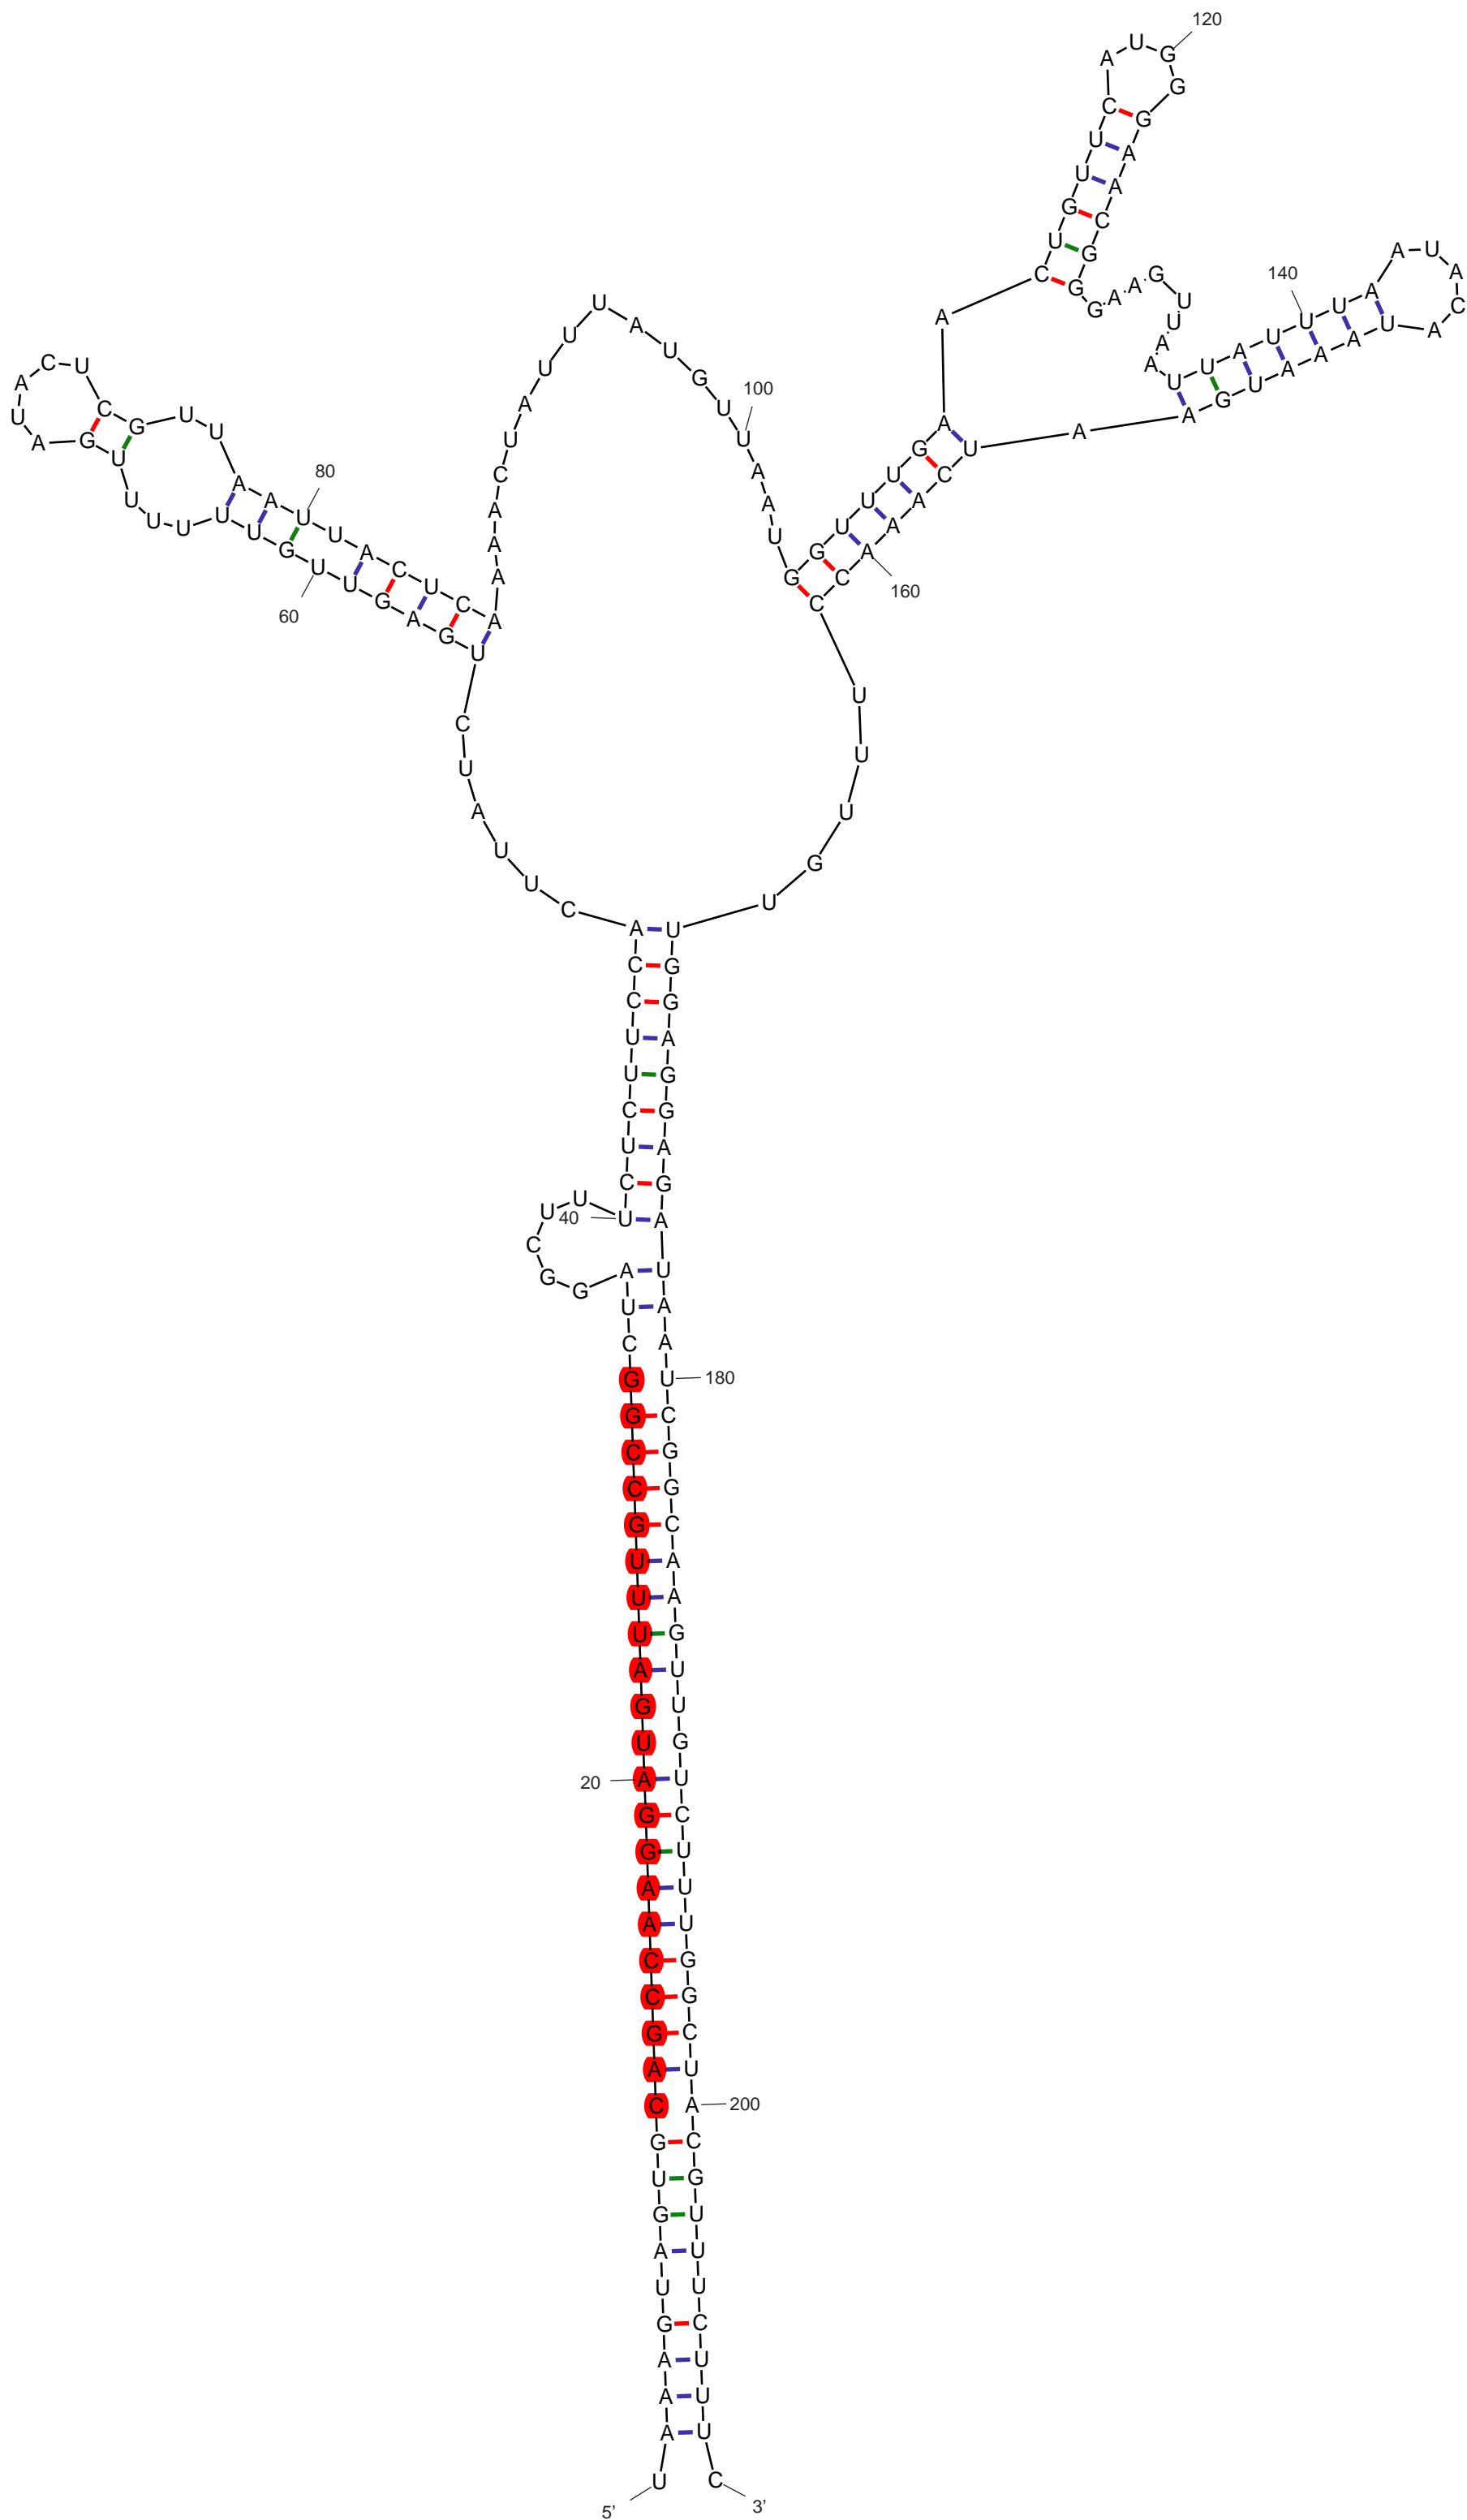

$dG = -61.85$  [Initially  $-67.80$ ] 67-MIR169\_2

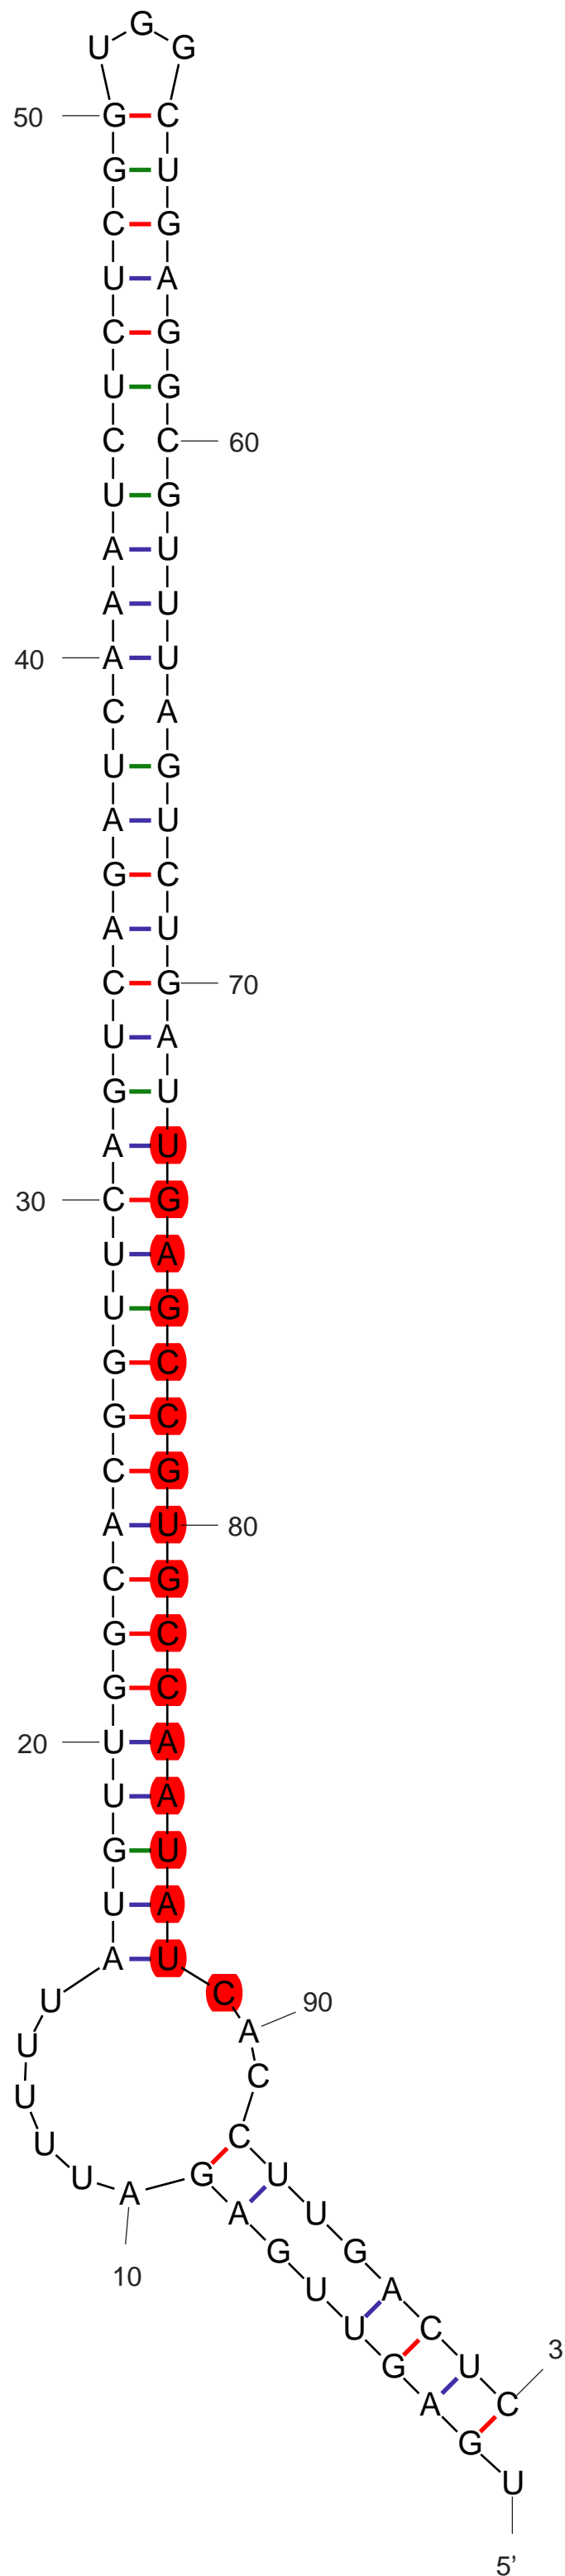

dG = -53.90 [Initially -53.90] 68-MIR171\_1-[fcc-MIR171g MI0017495]

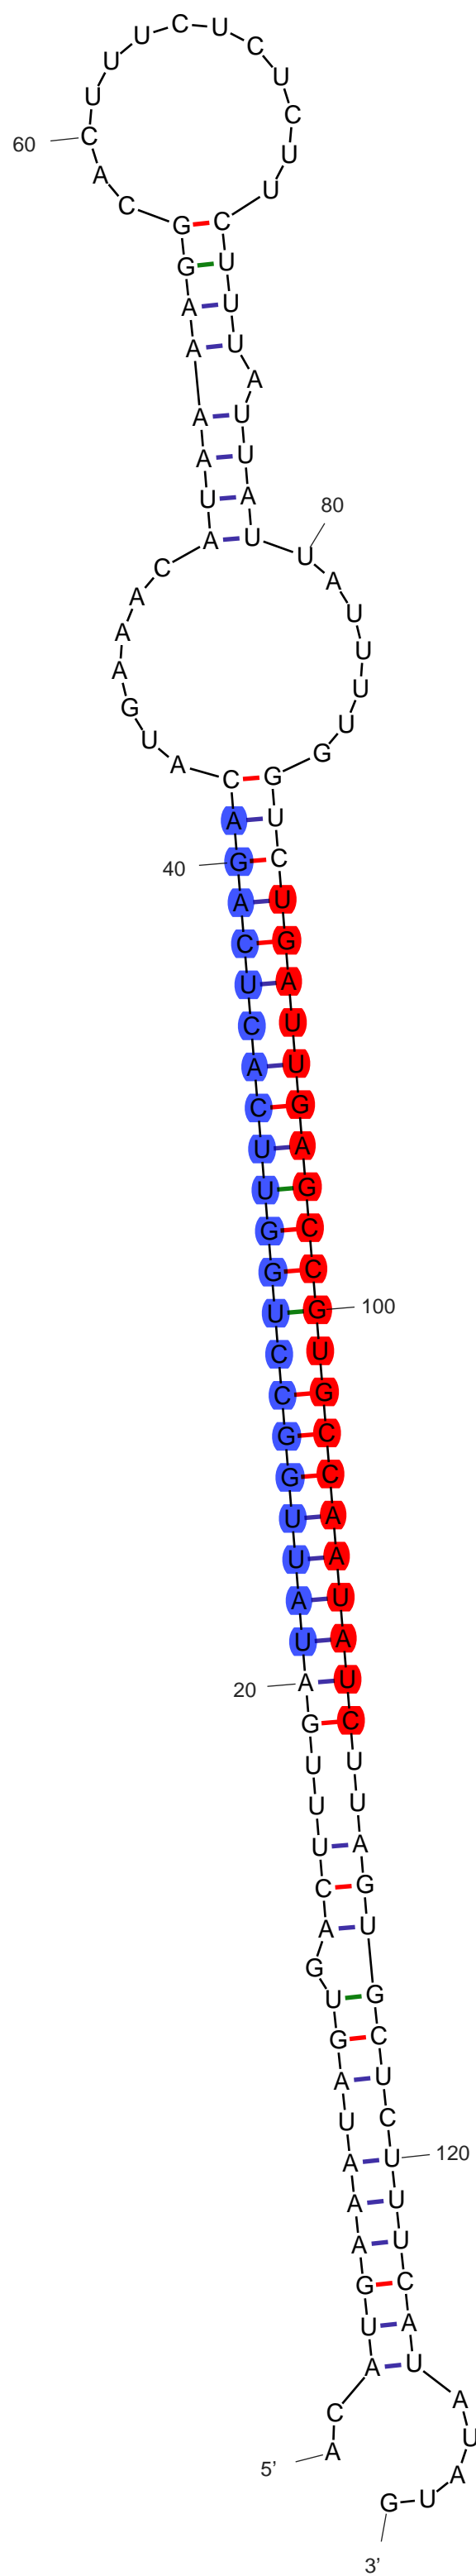

$dG = -43.50$  [Initially  $-43.50$ ] 69-MIR171\_1



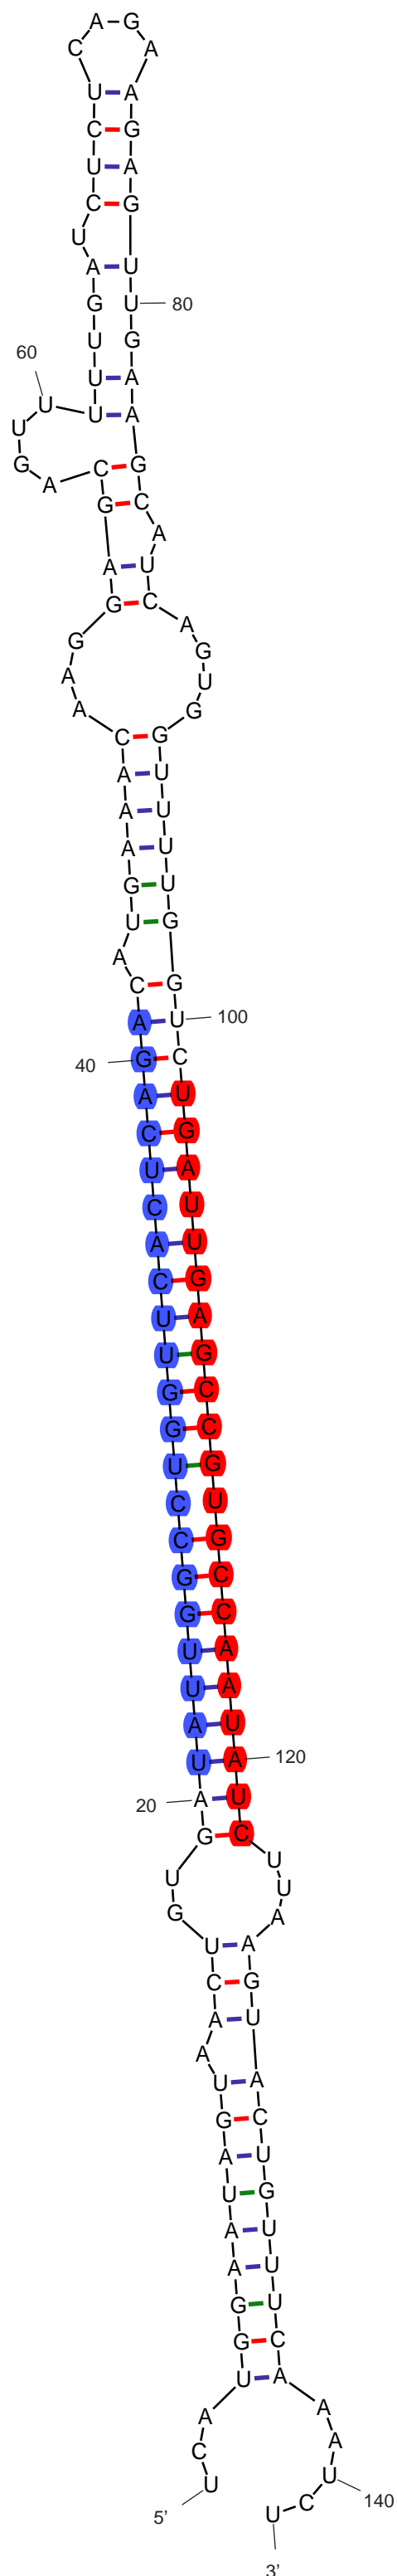

$dG = -56.20$  [Initially  $-56.20$ ] 71-MIR171\_1

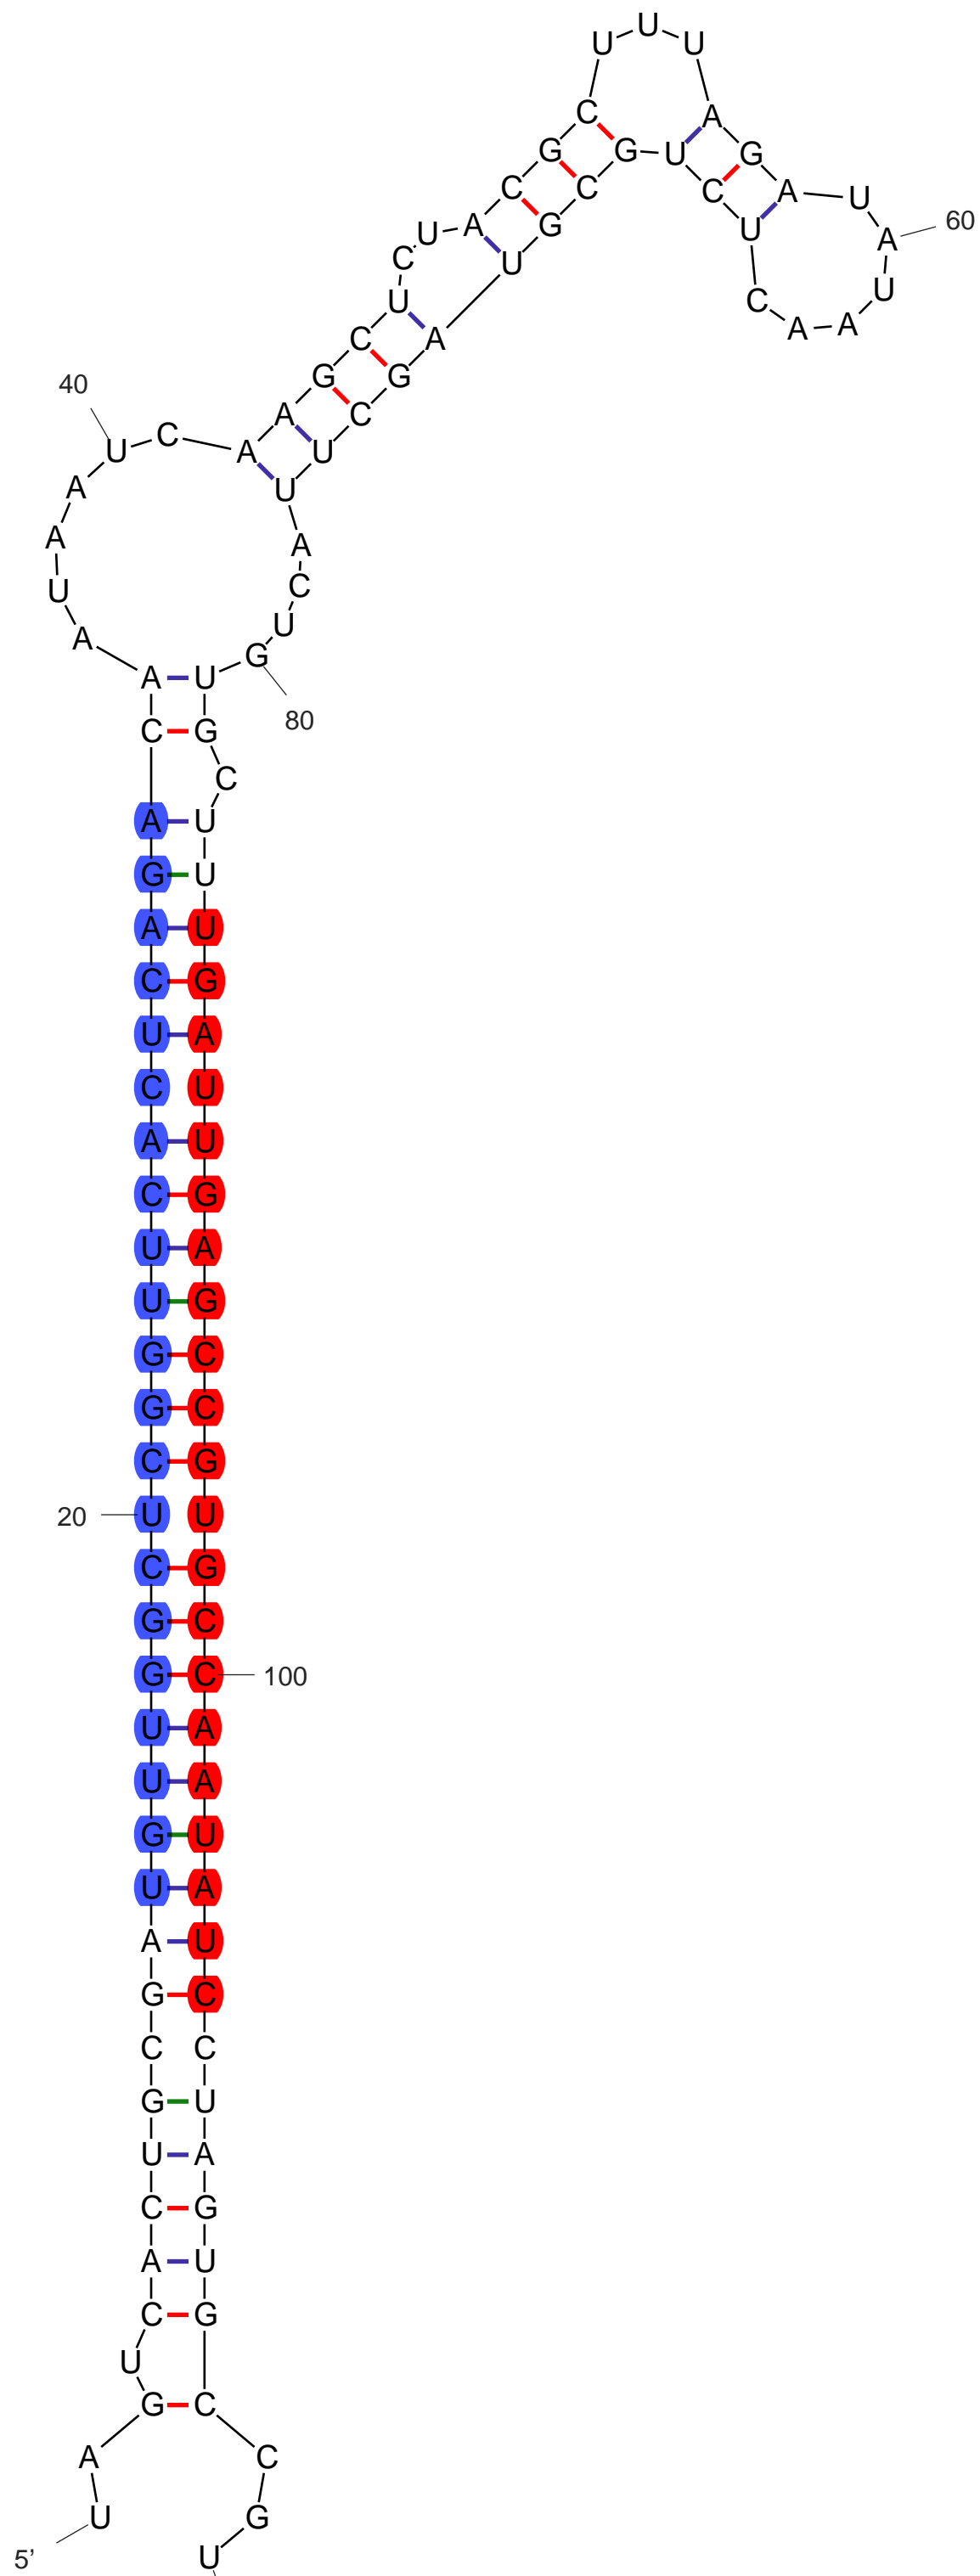

dG = -45.90 [Initially -45.90] 72-MIR171\_1

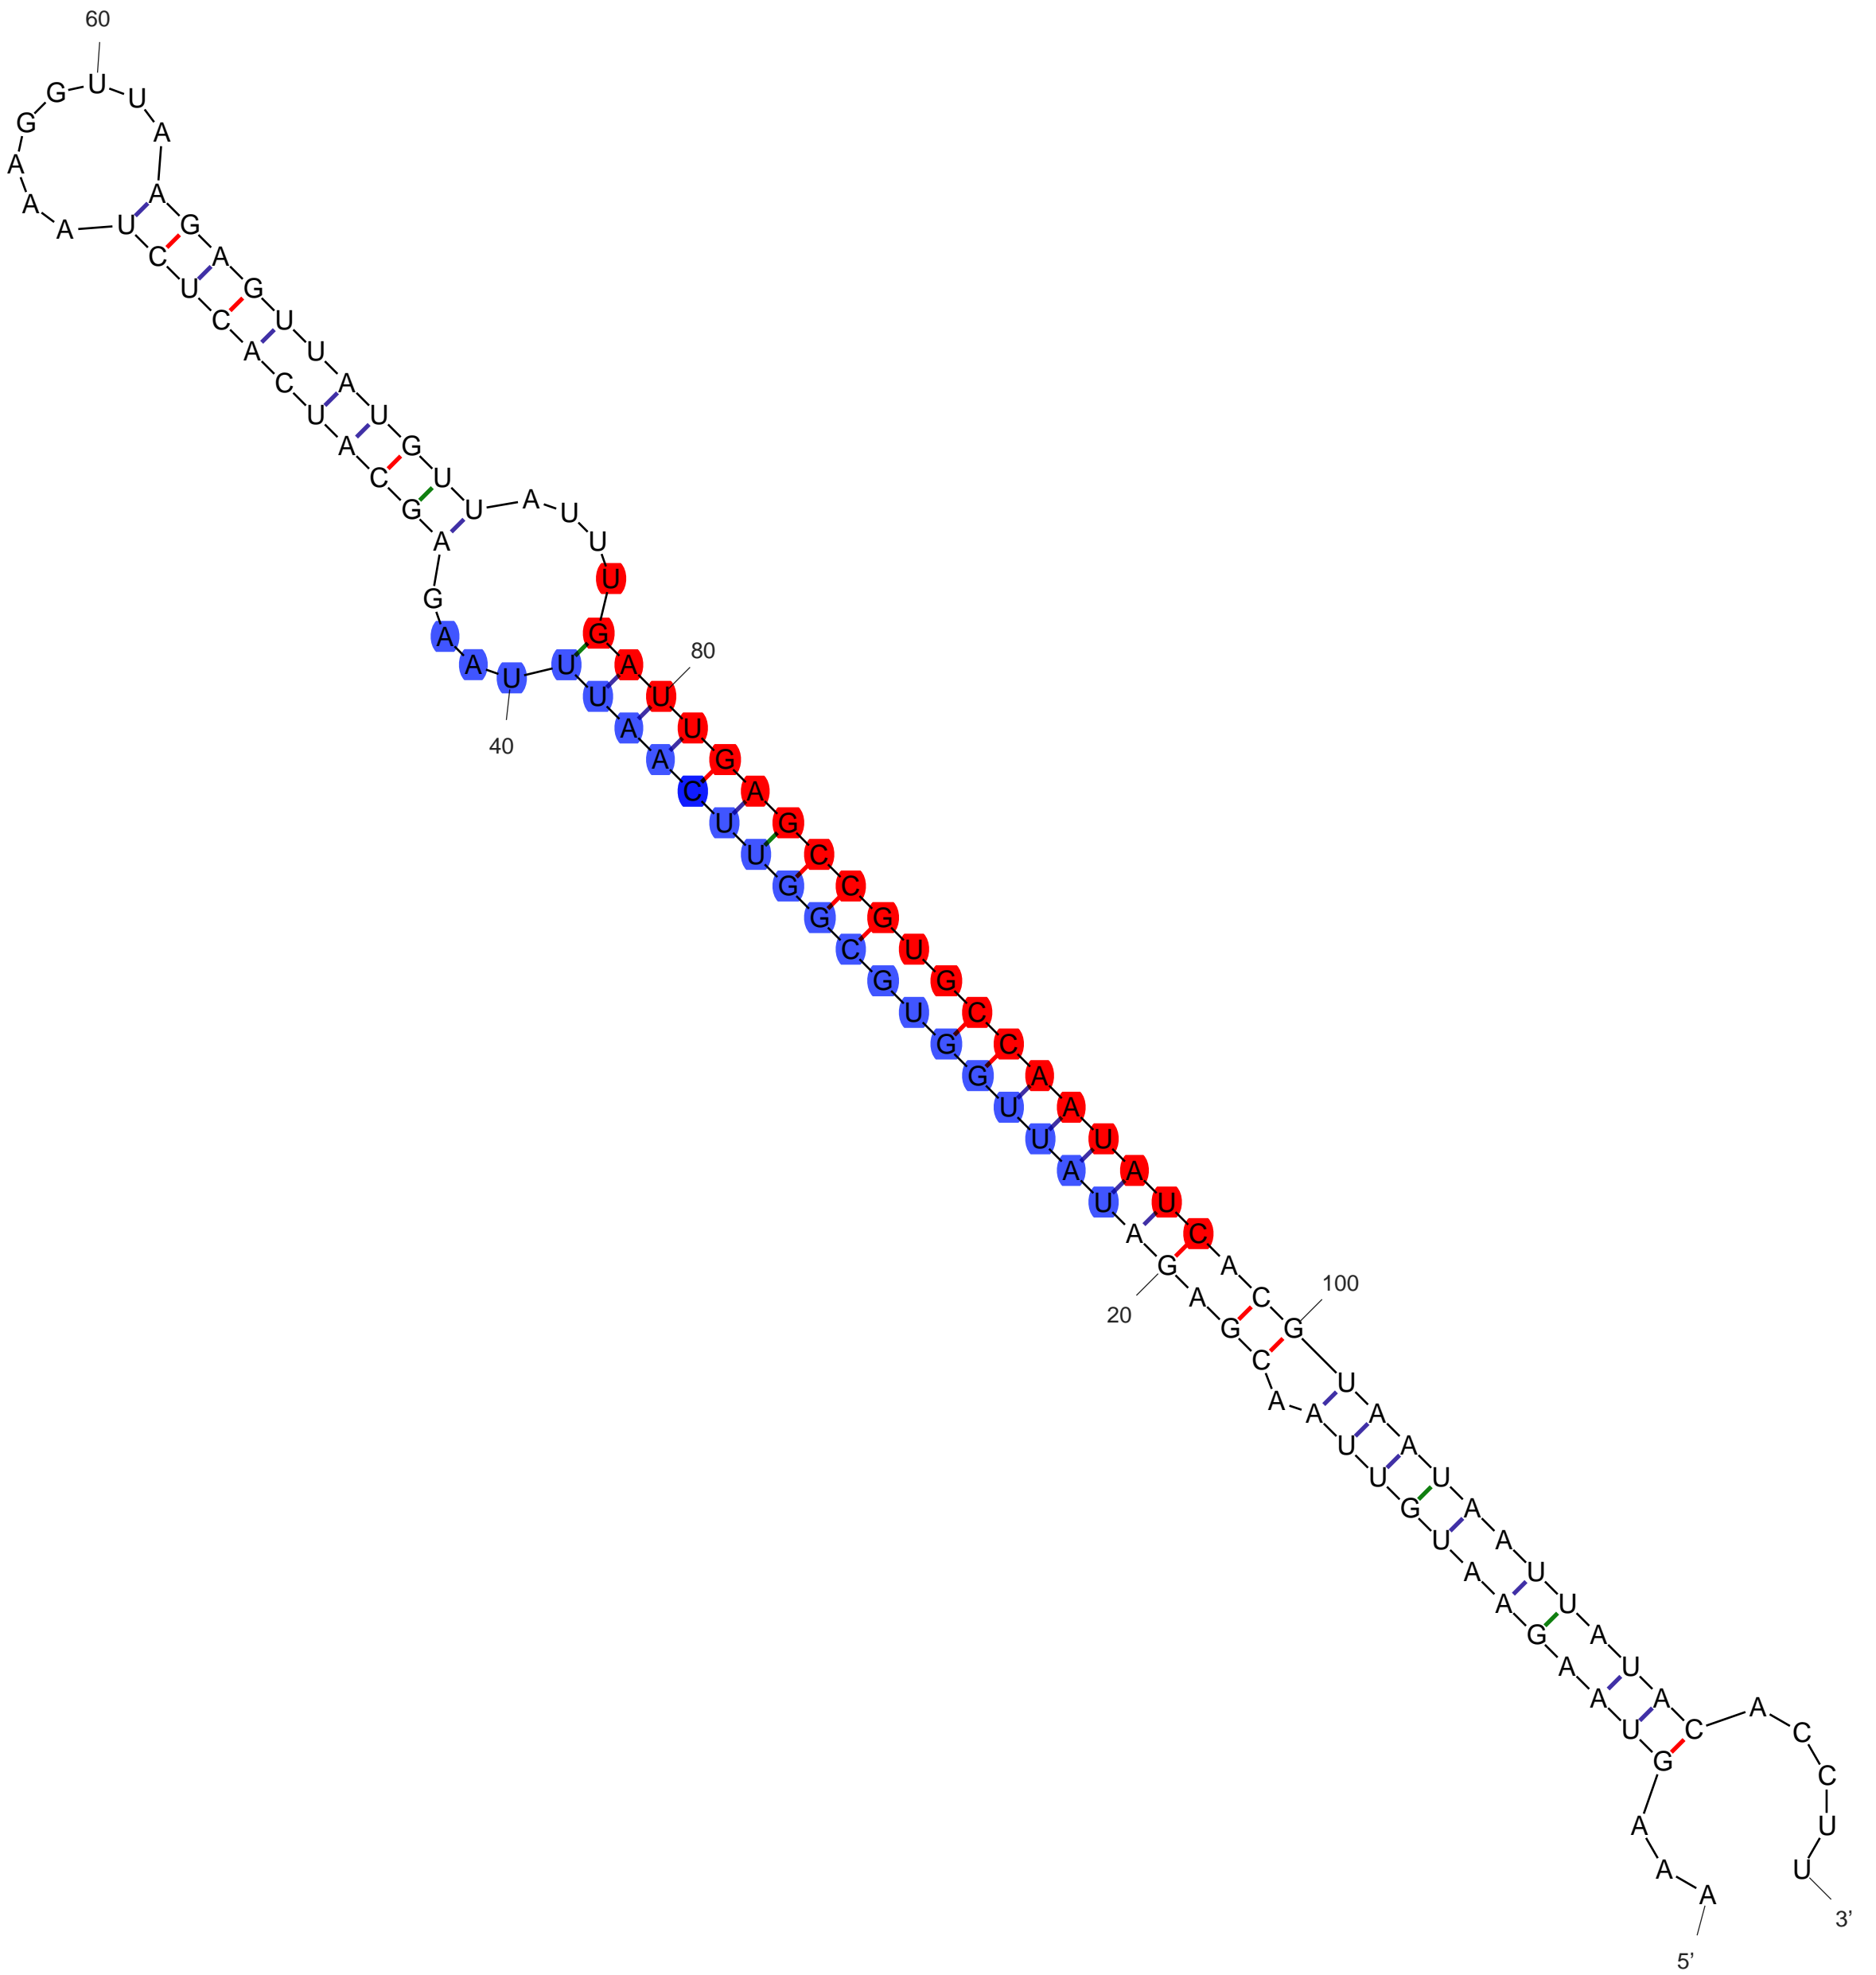

$dG = -48.40$  [Initially -48.40] 73\_MIR171\_1-[tcc-MIR171d MI0017492]

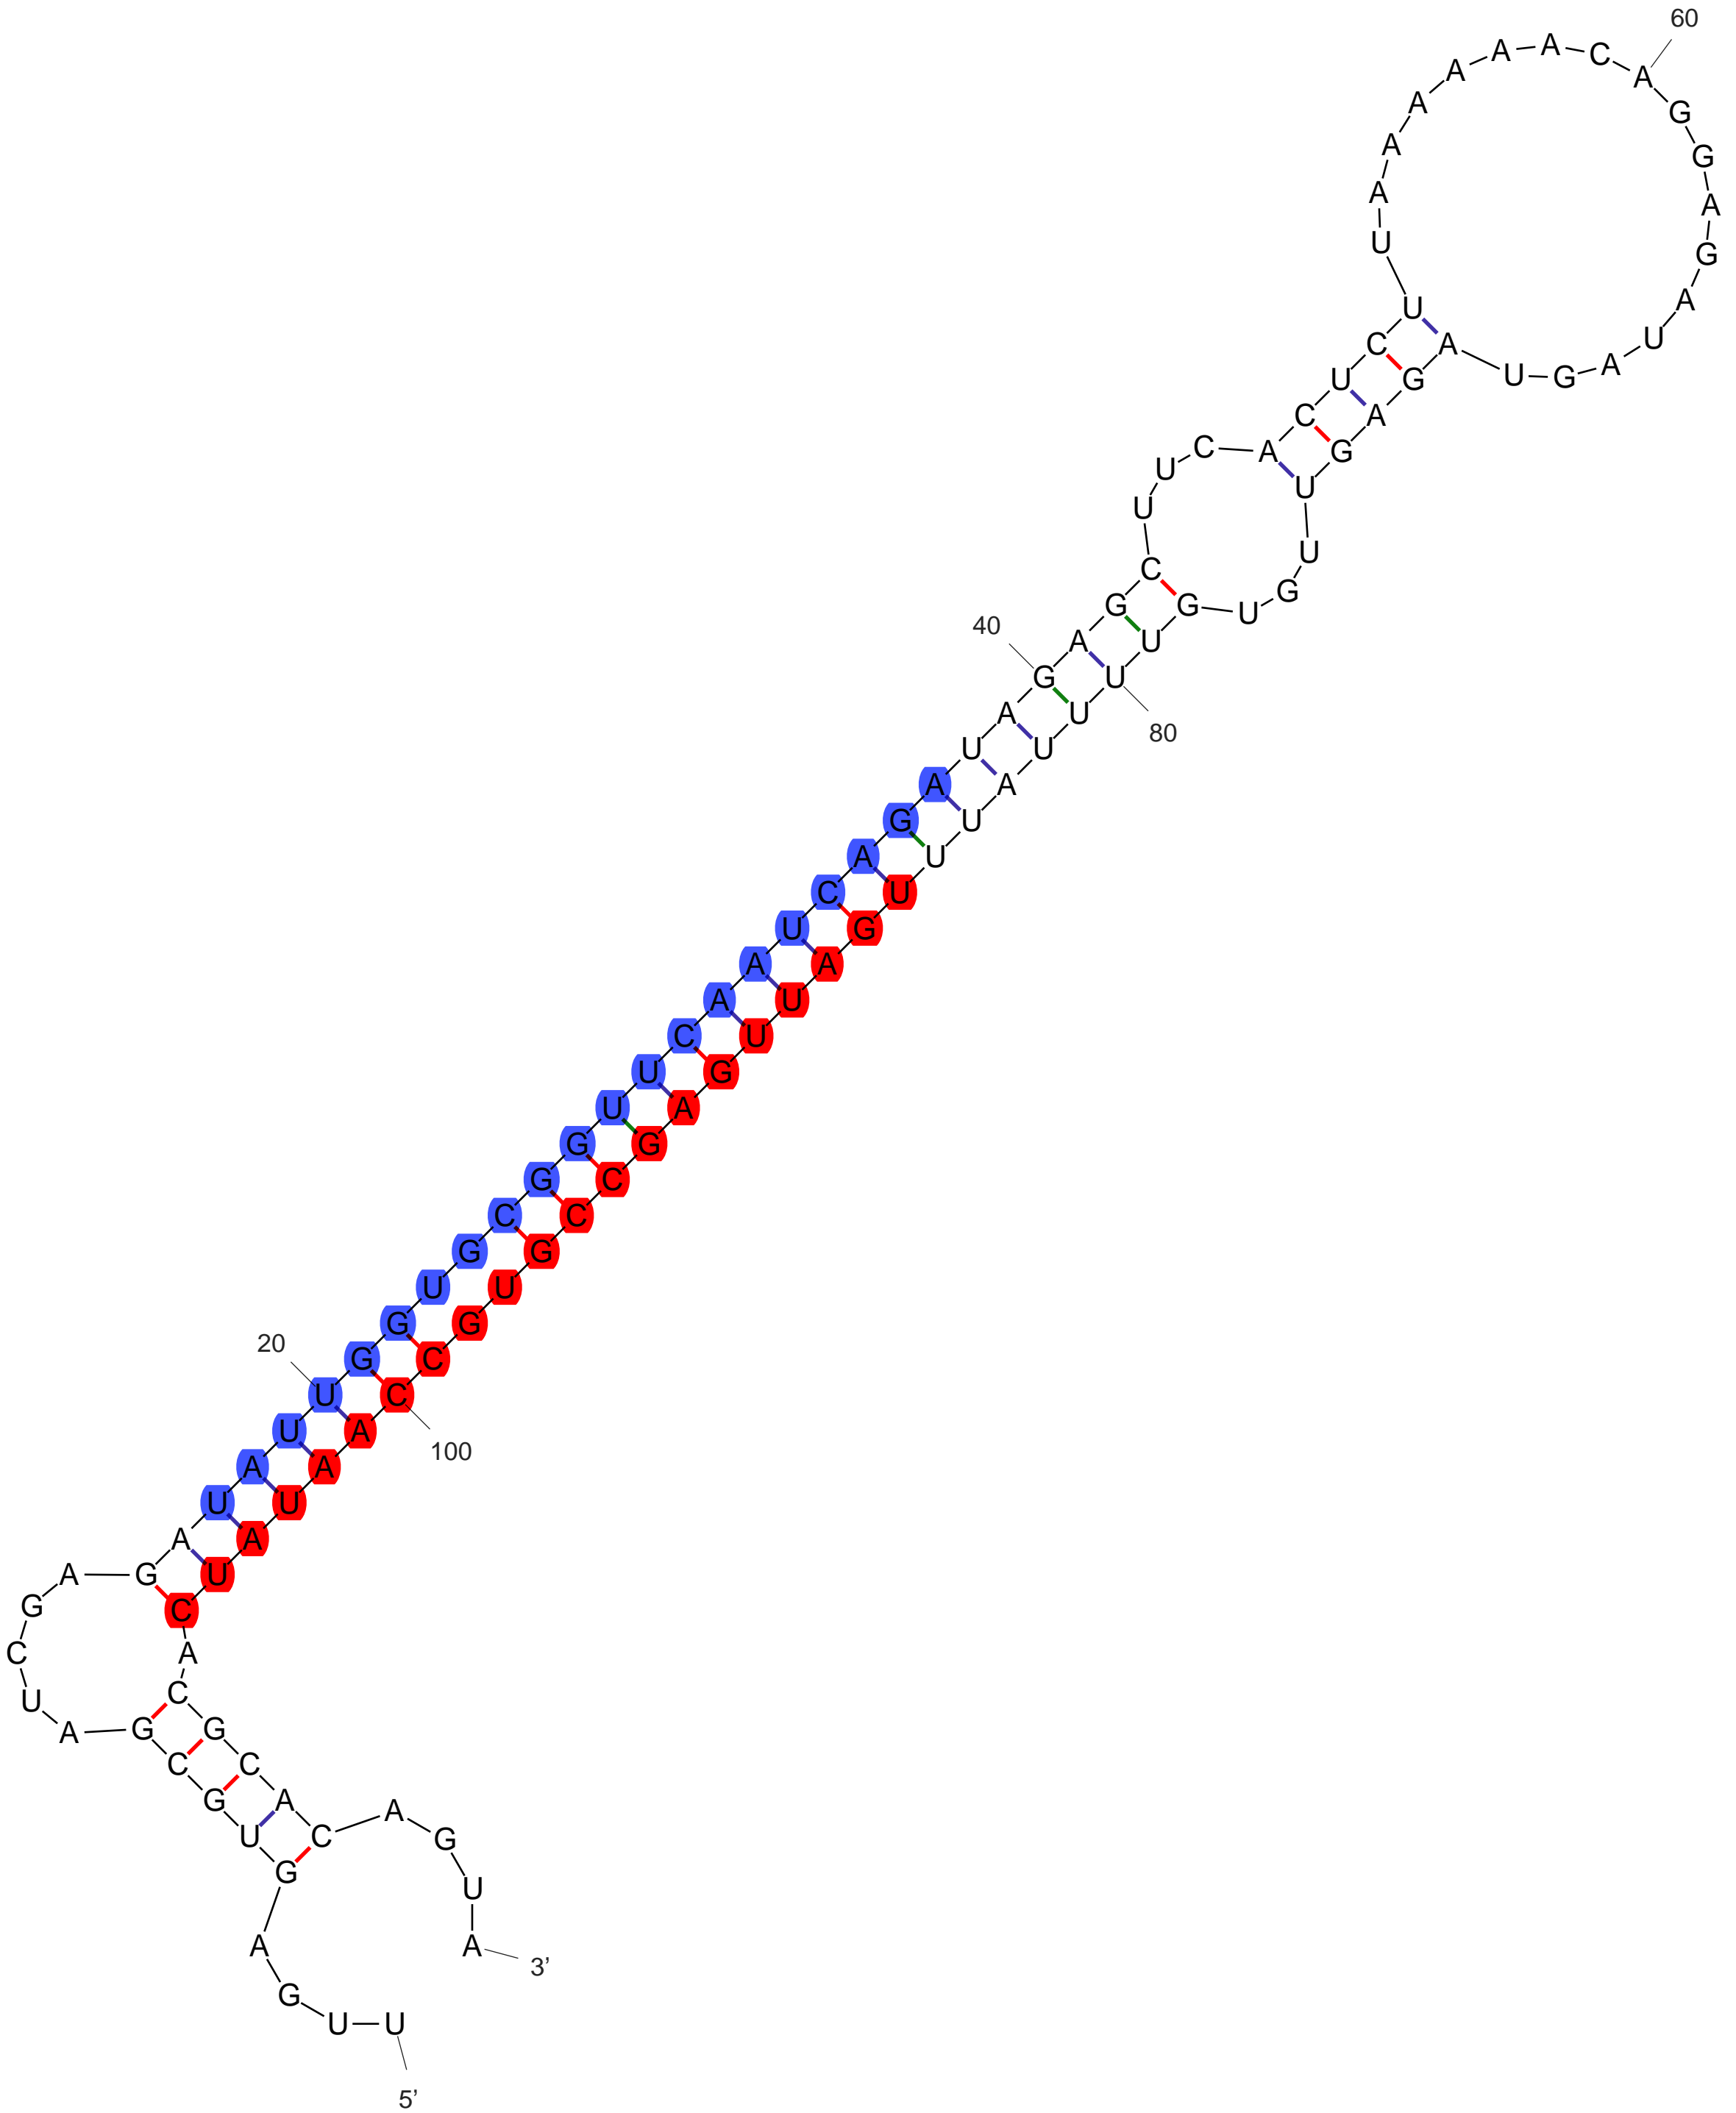

$dG = -54.70$  [Initially -54.70] 74\_MIR171\_1



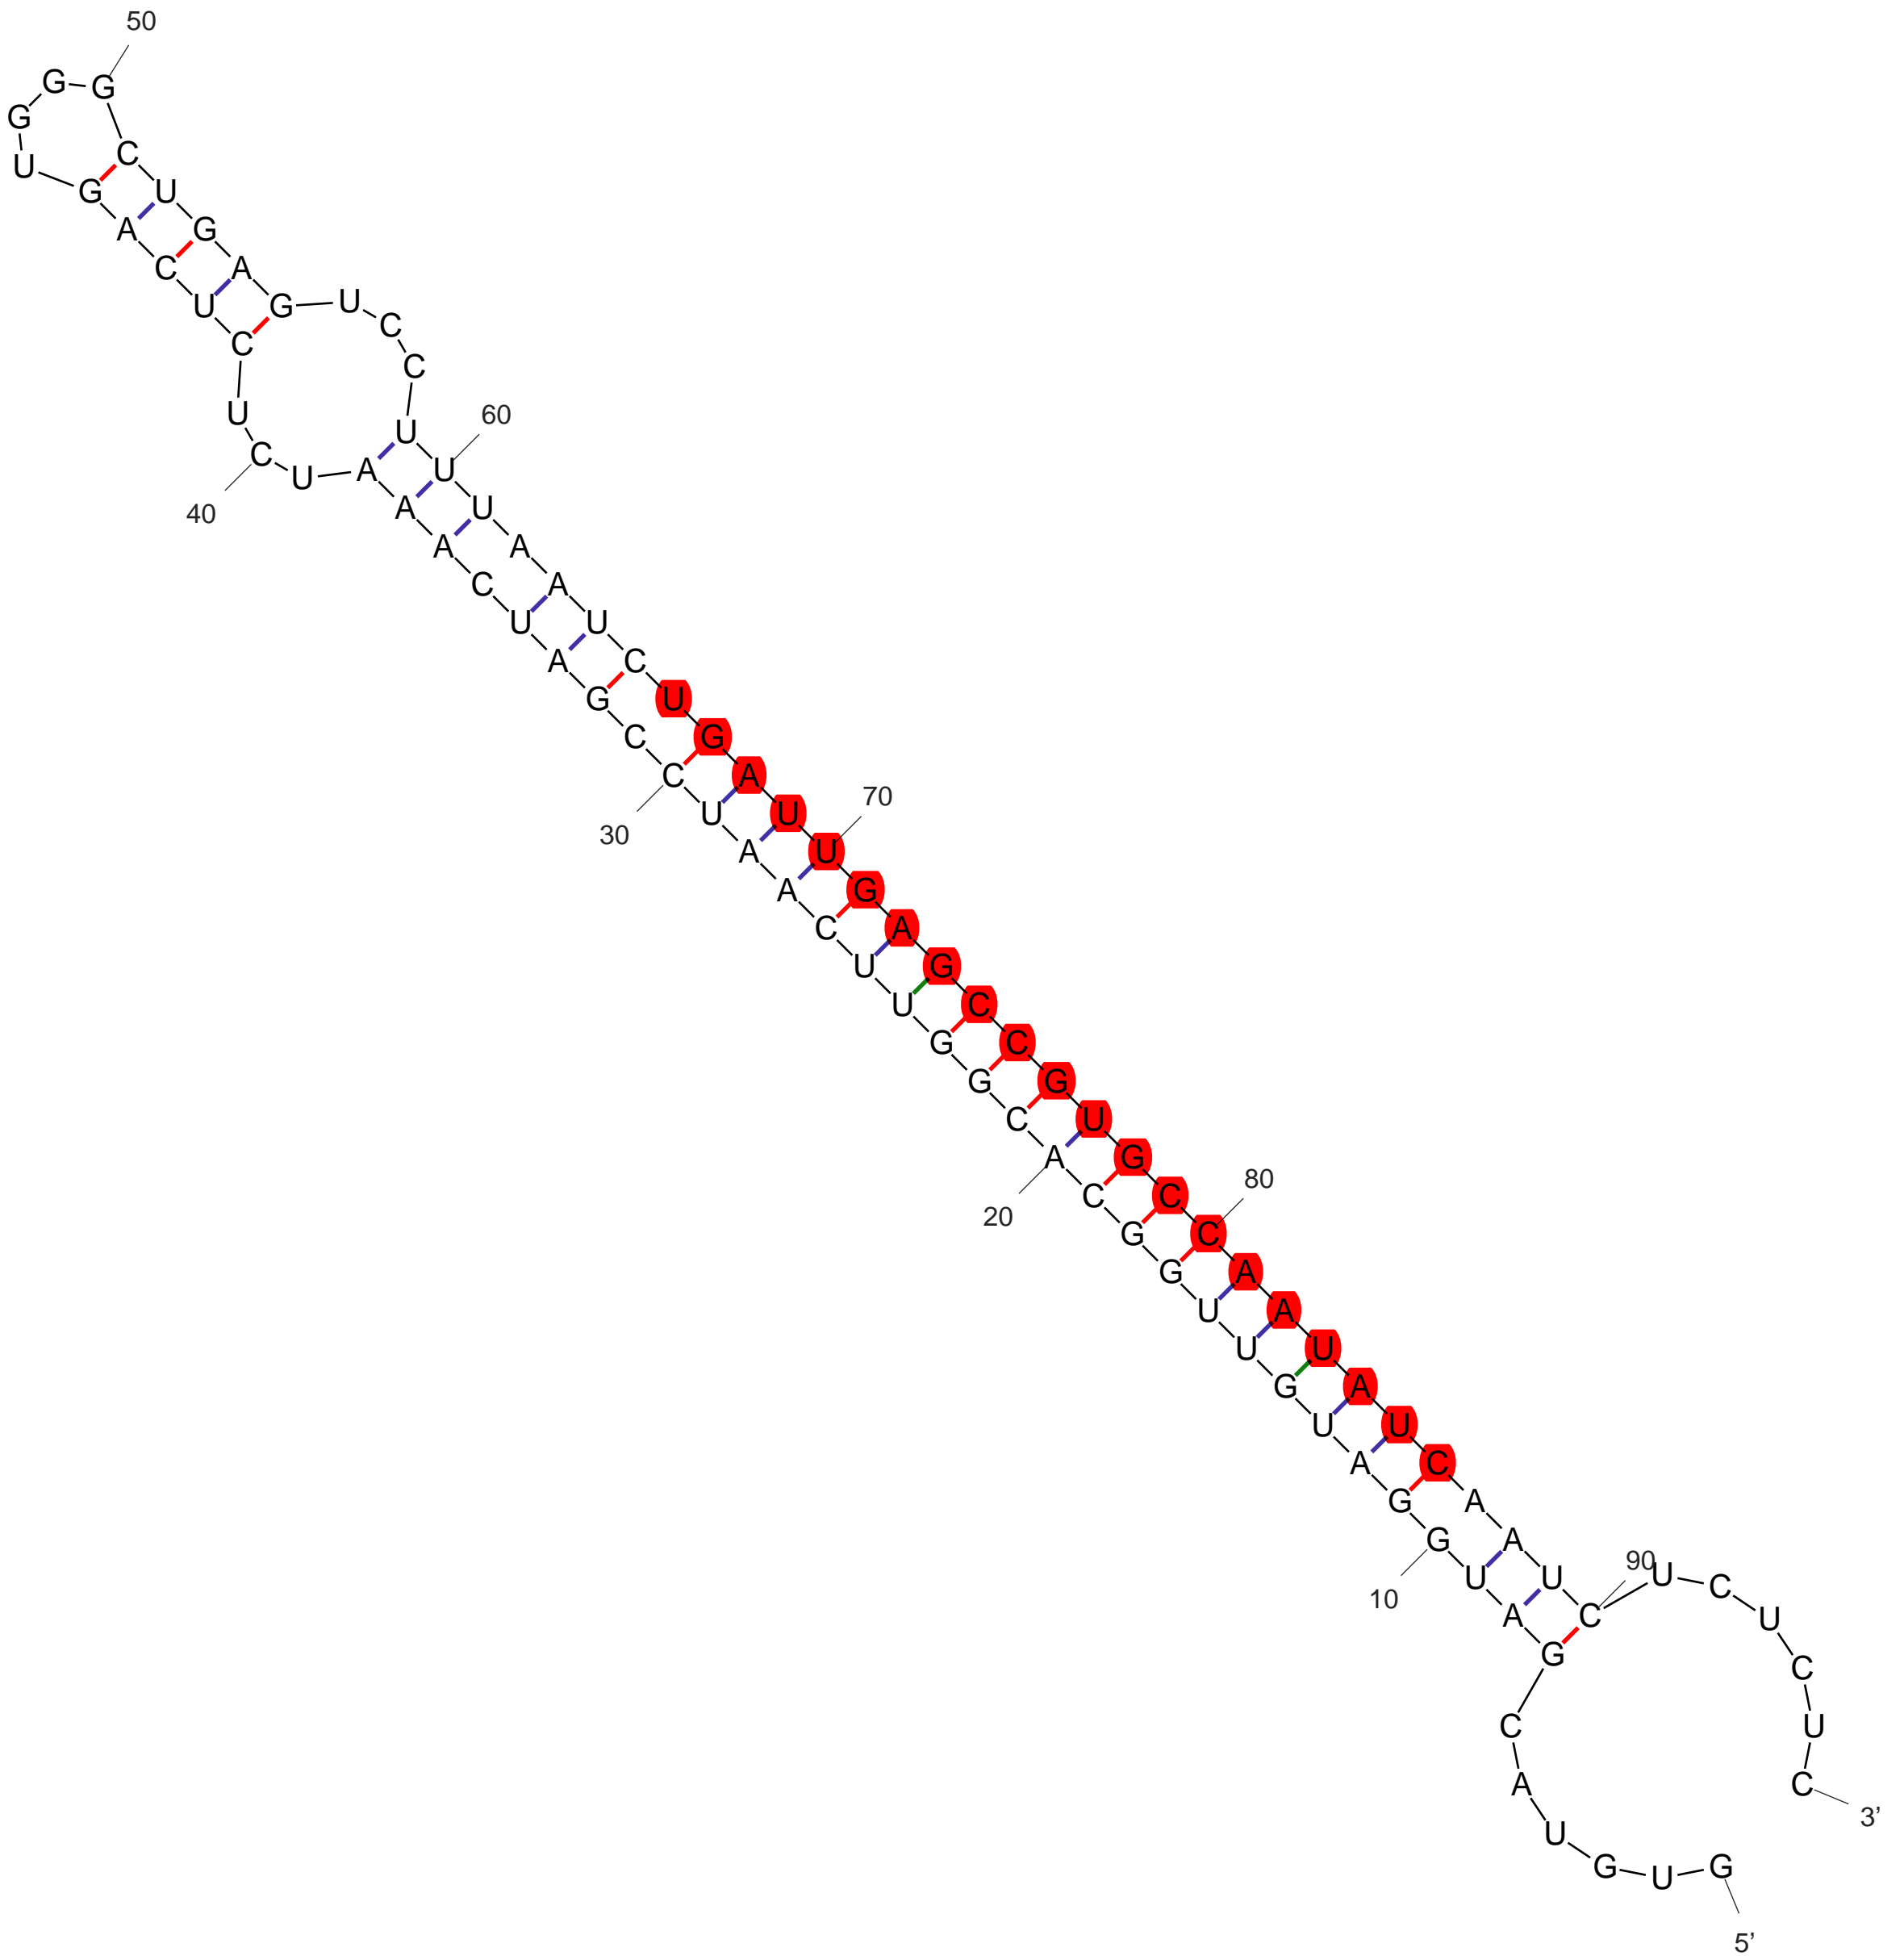

*dG = -48.00 [Initially -48.00] 75-MIR171-1-[tcc-MIR171g MI0017495]*



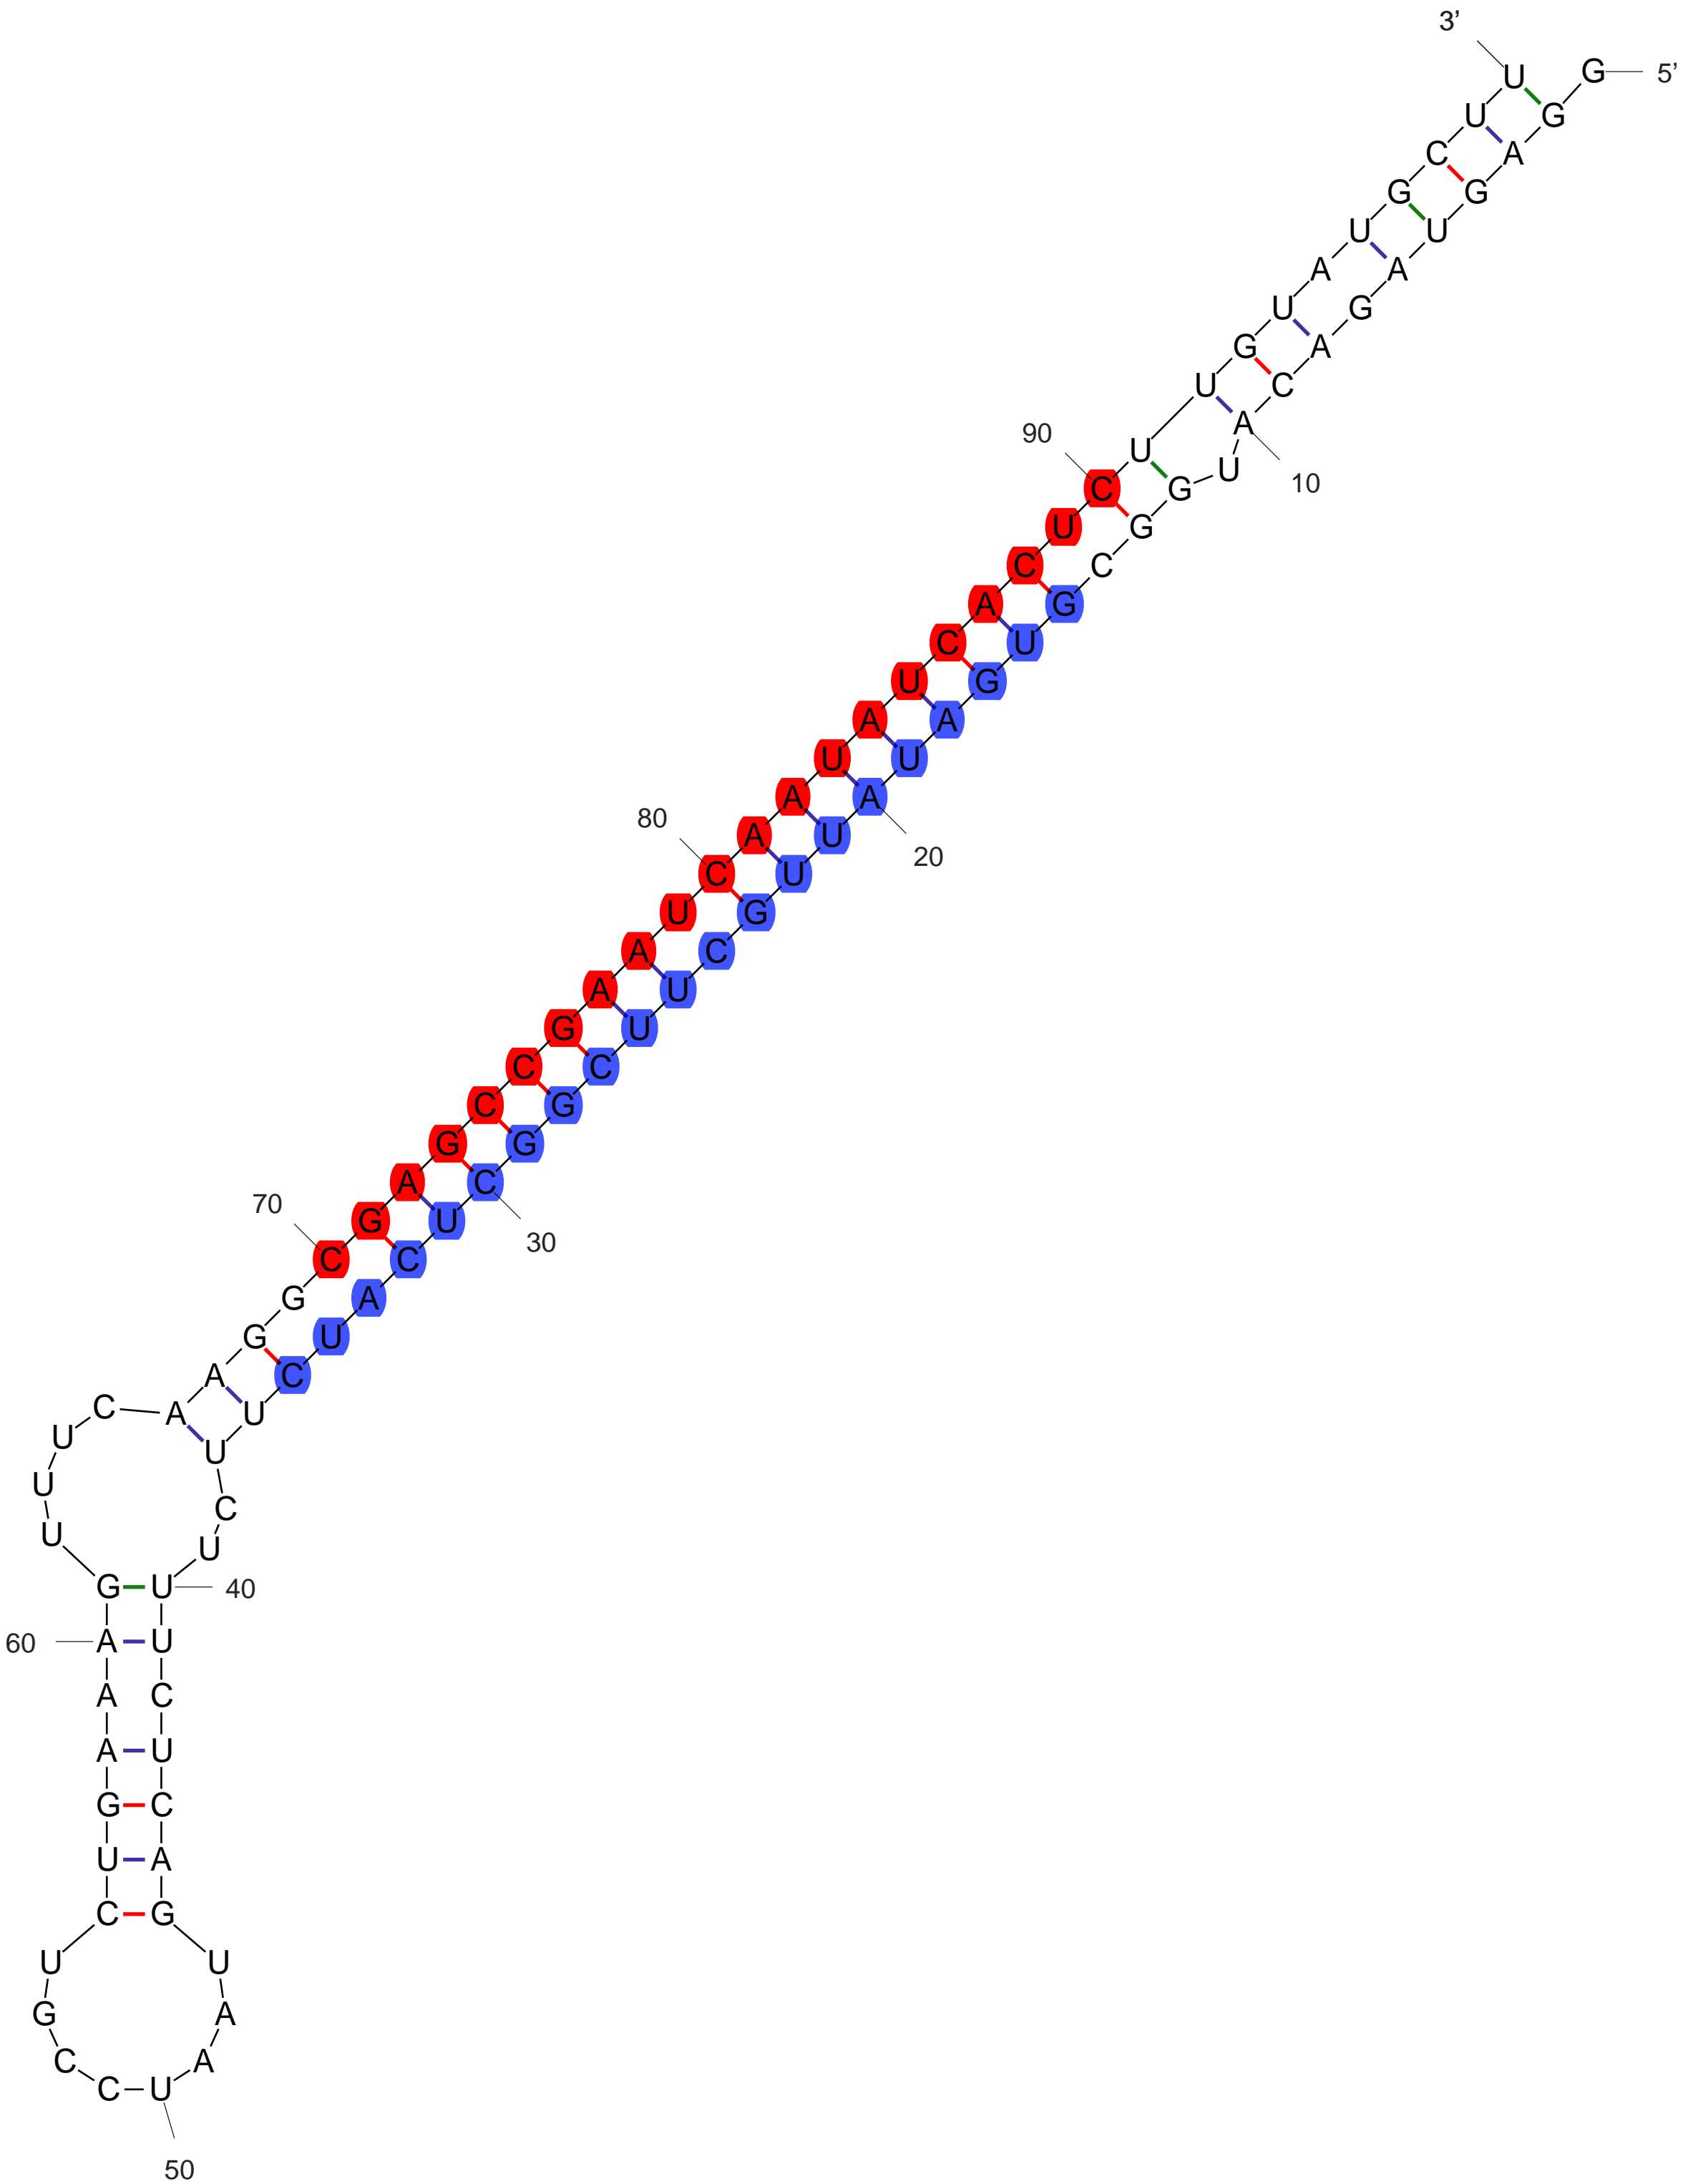

$dG = -38.60$  [Initially -38.60] 77-MIR171\_2-[fcc-MIR172e MI0017501]



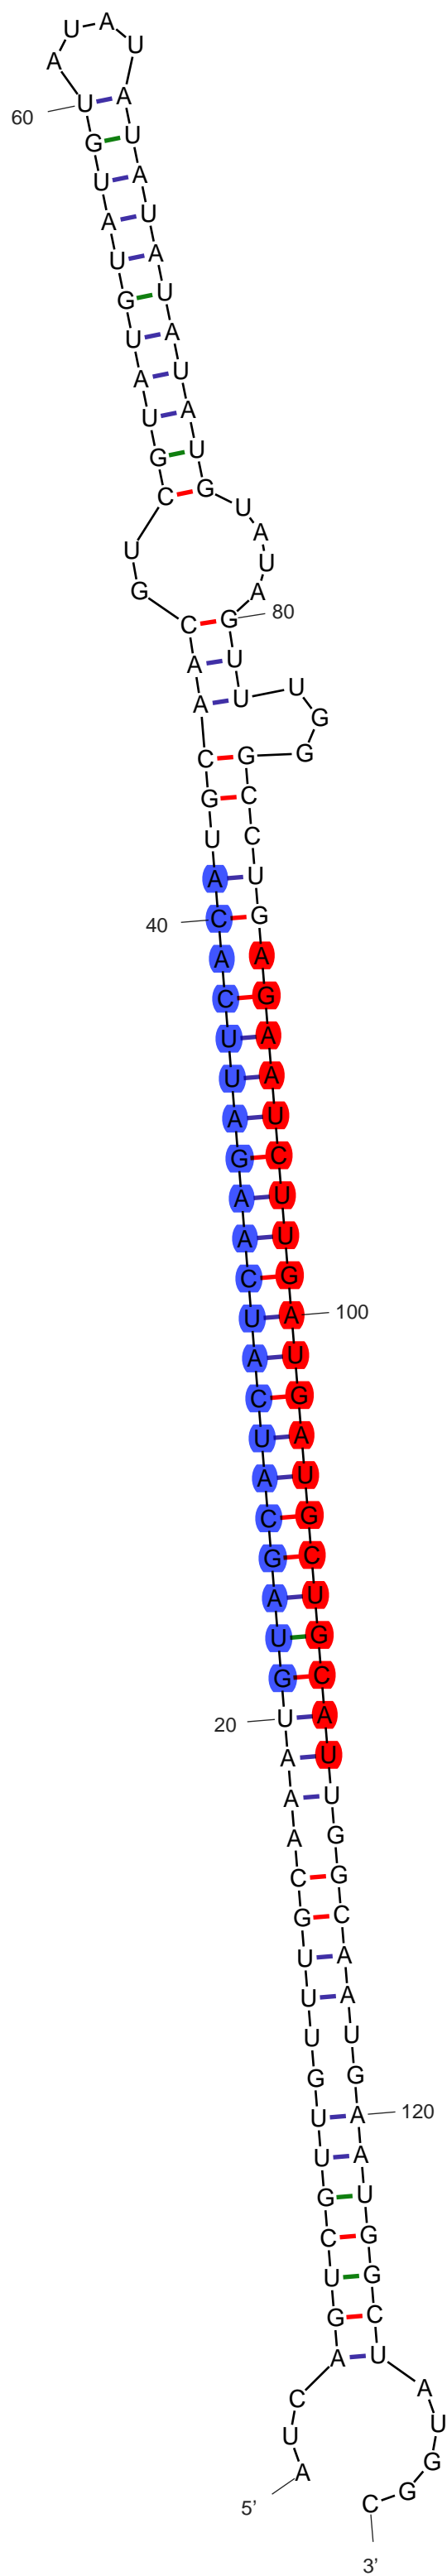

$dG = -59.30$  [Initially  $-59.30$ ] 79-MIR172

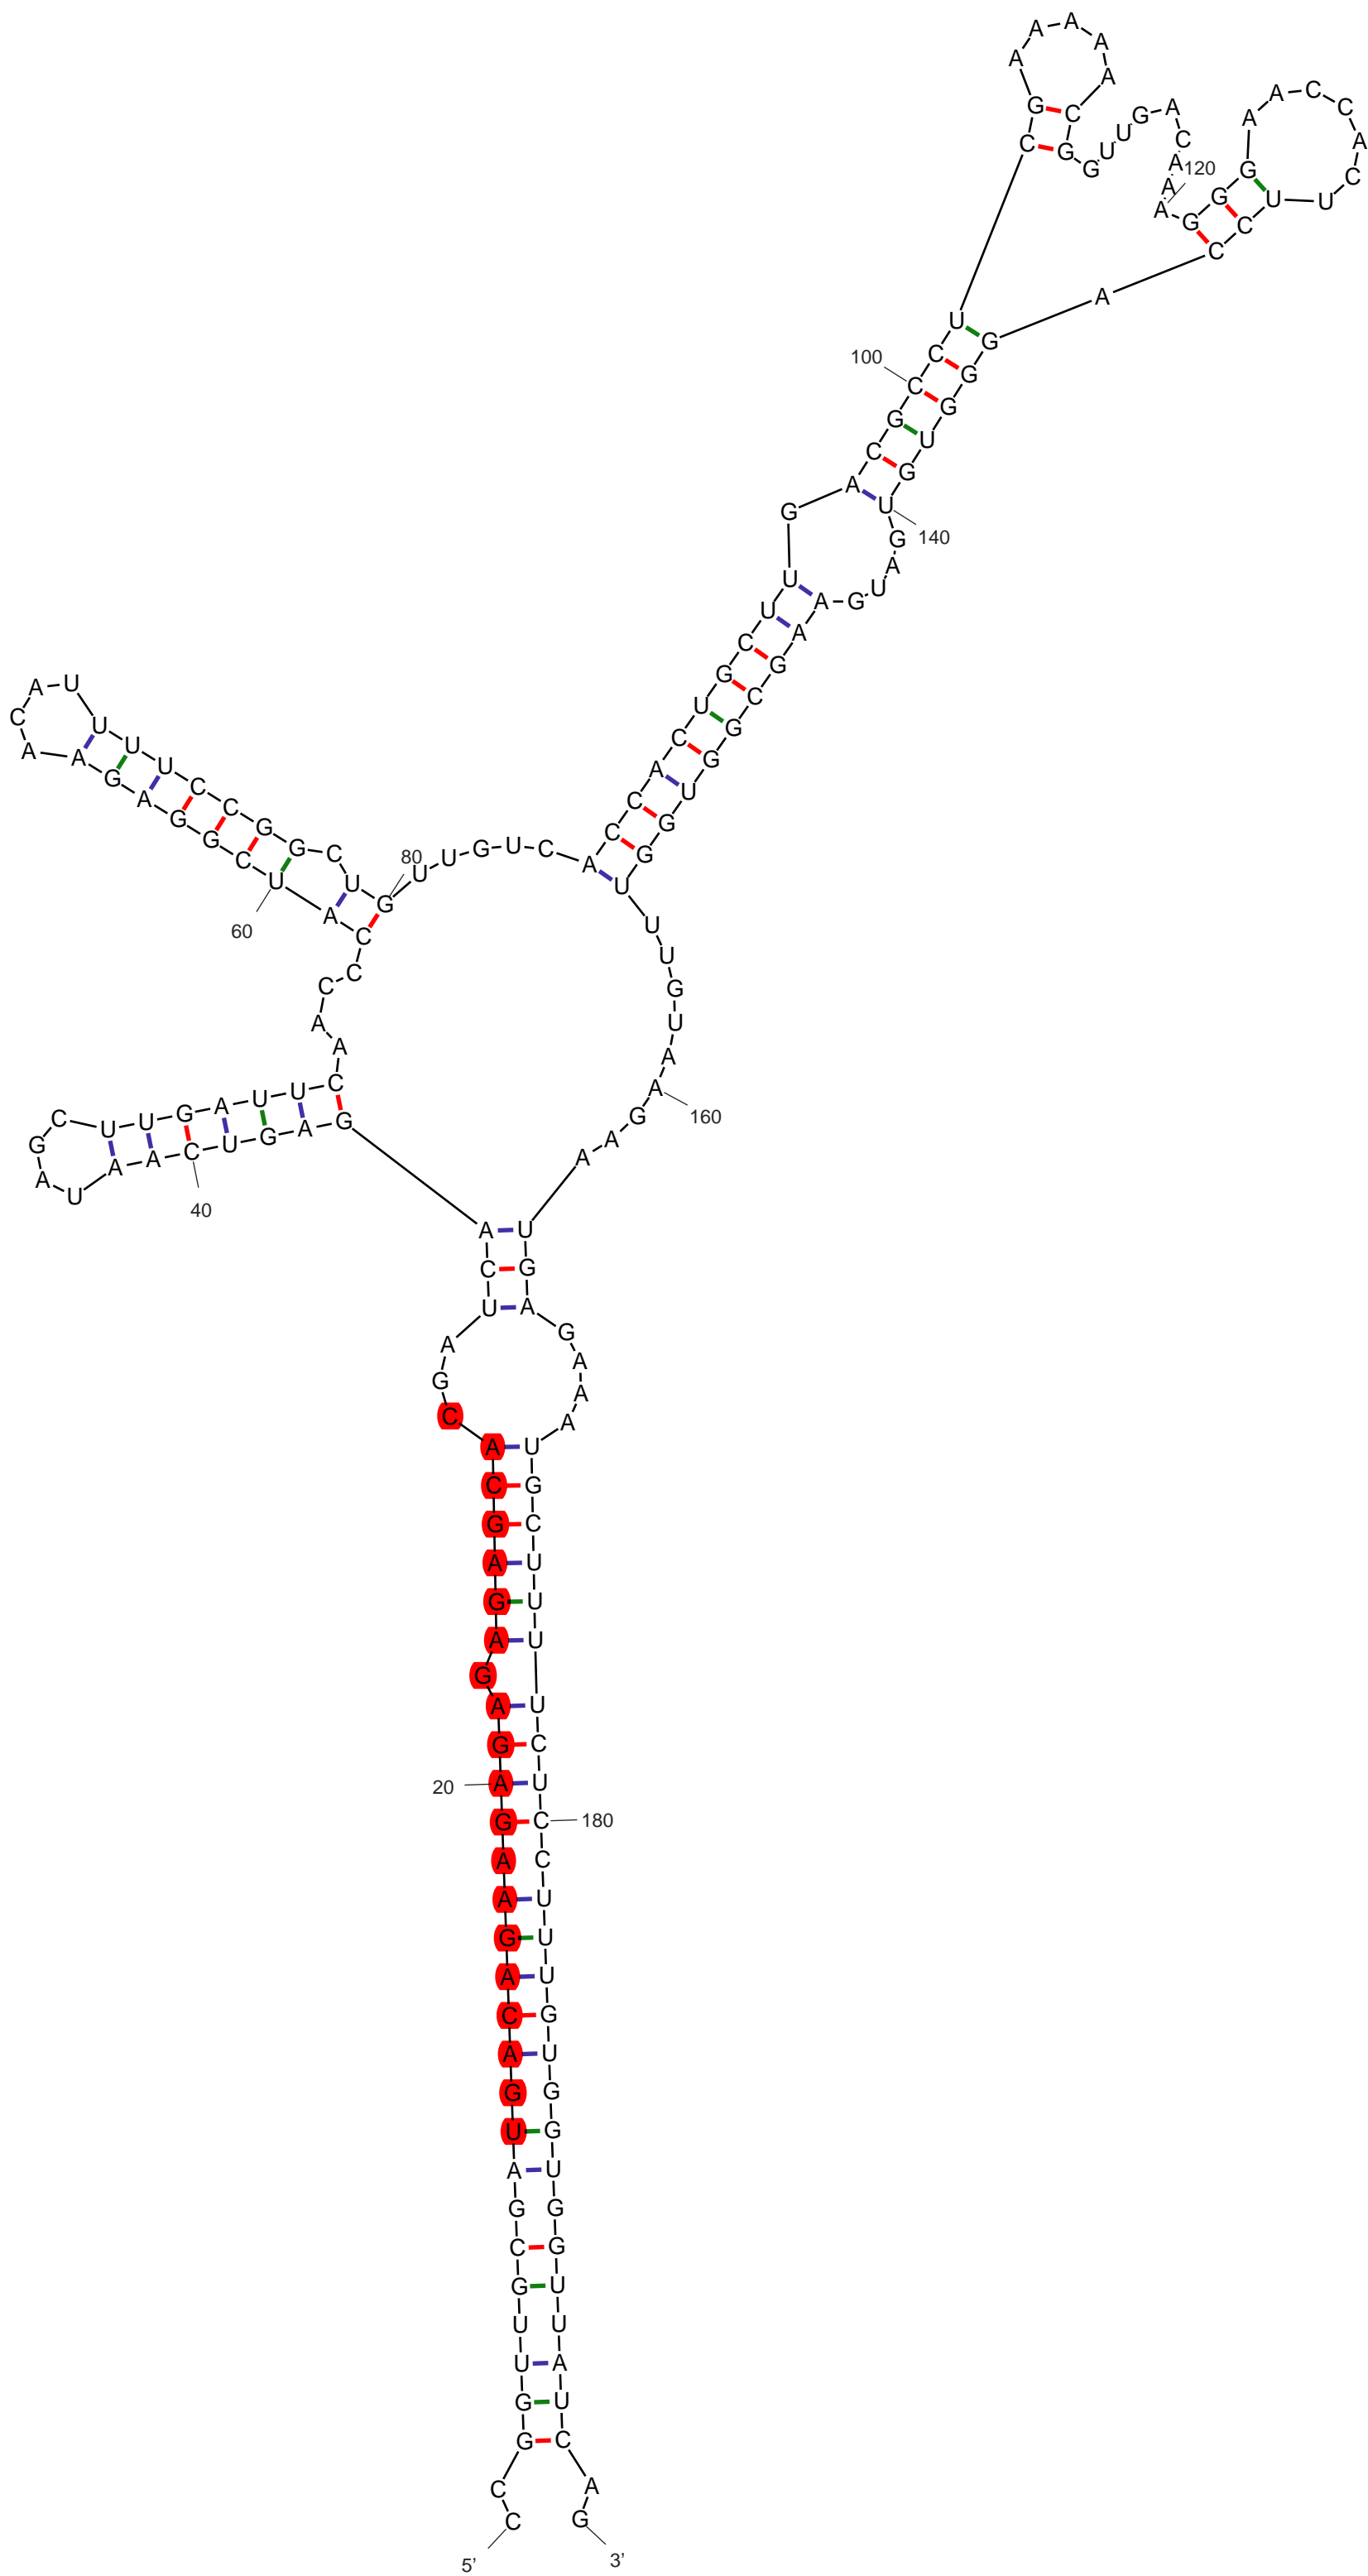

***dG = -55.03 [Initially -60.20] 7-MIR156***

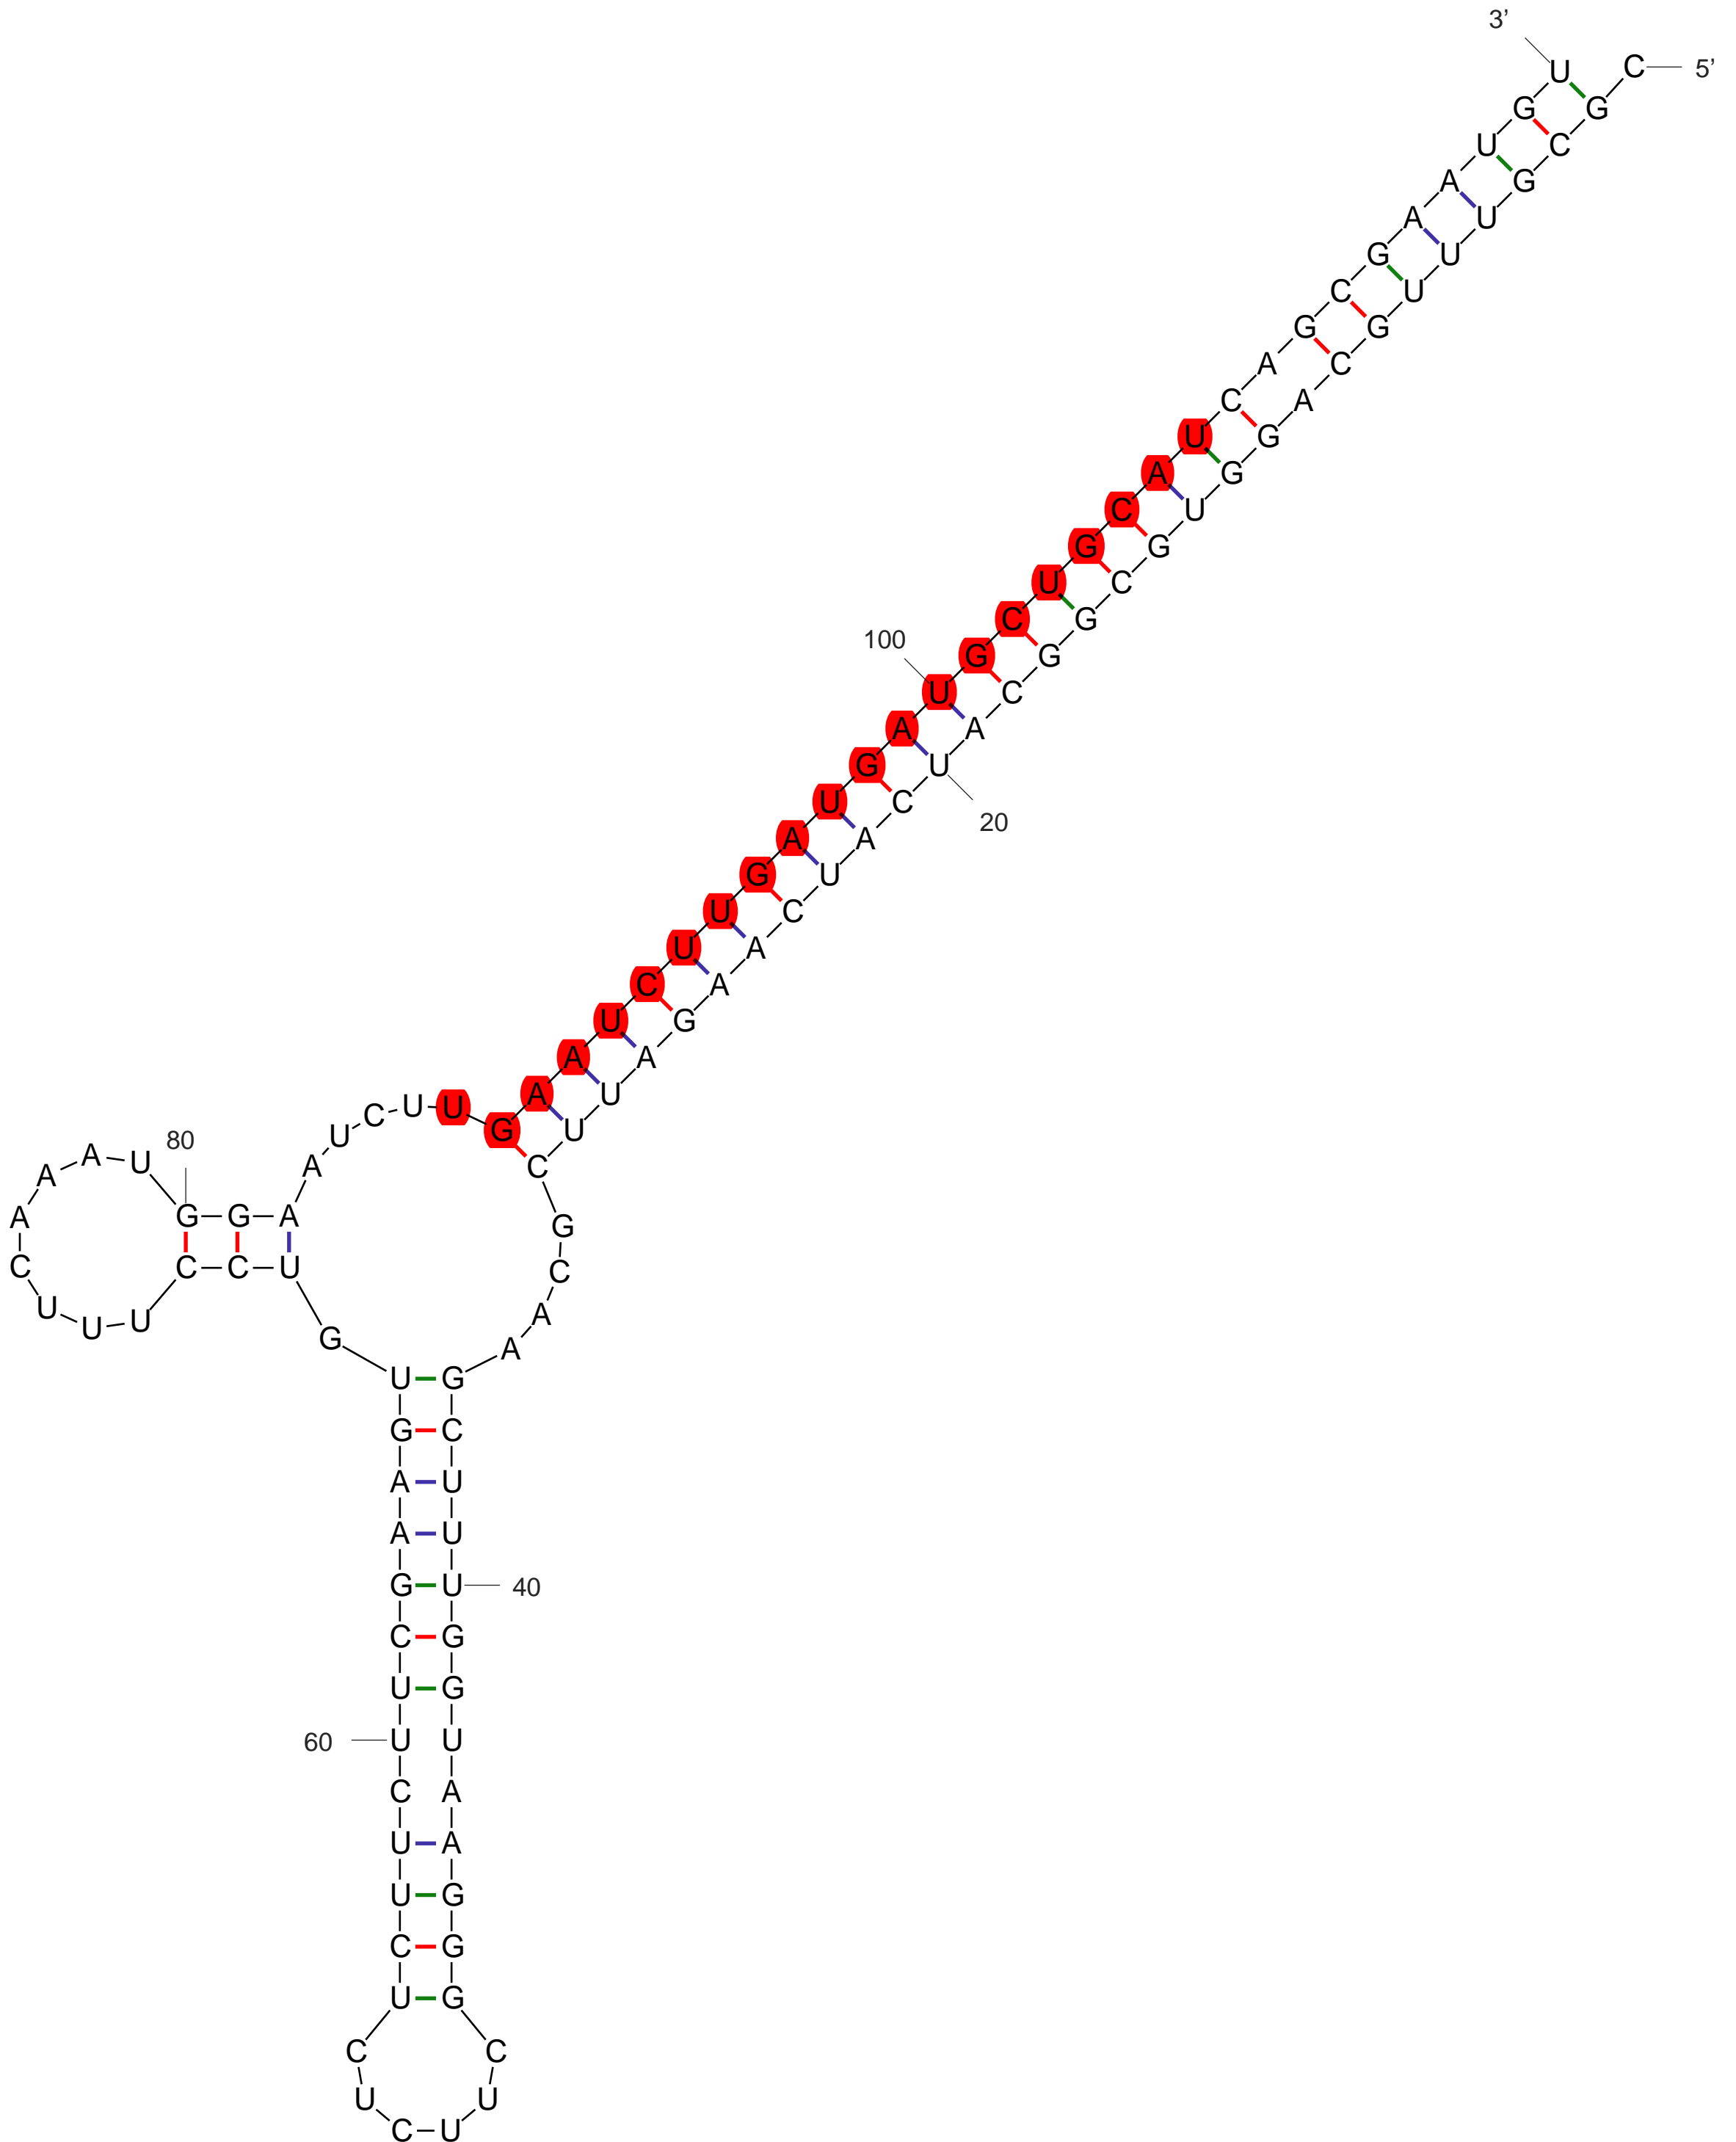

$dG = -57.24$  [Initially -59.10] 80-MIR172

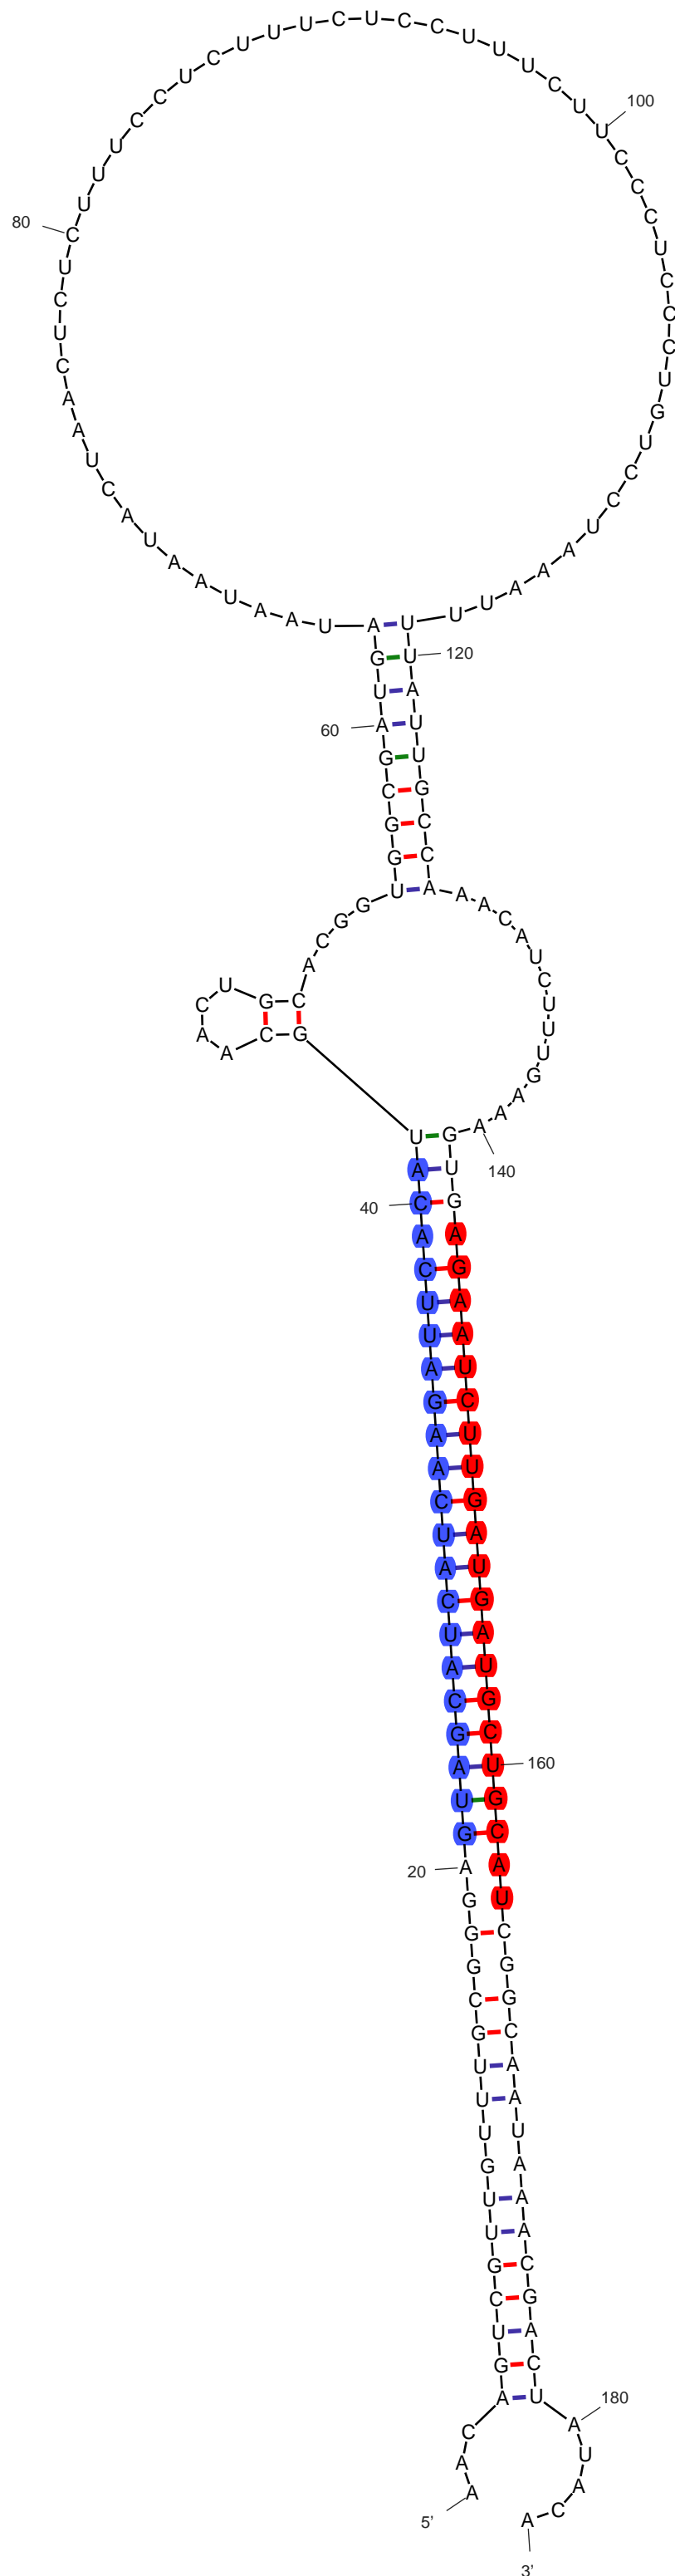

$dG = -54.80$  [Initially  $-58.45$ ] 81-MIR172



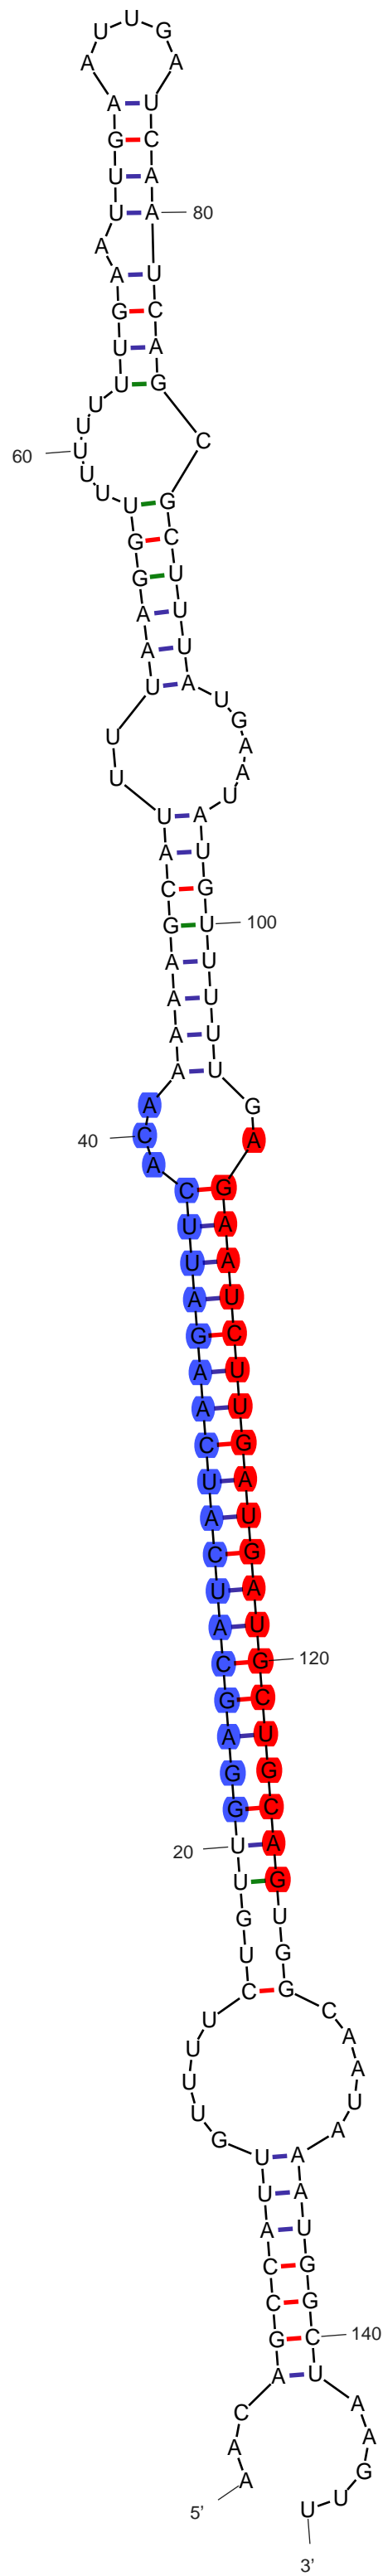

$dG = -54.60$  [Initially  $-54.60$ ] 82-MIR172



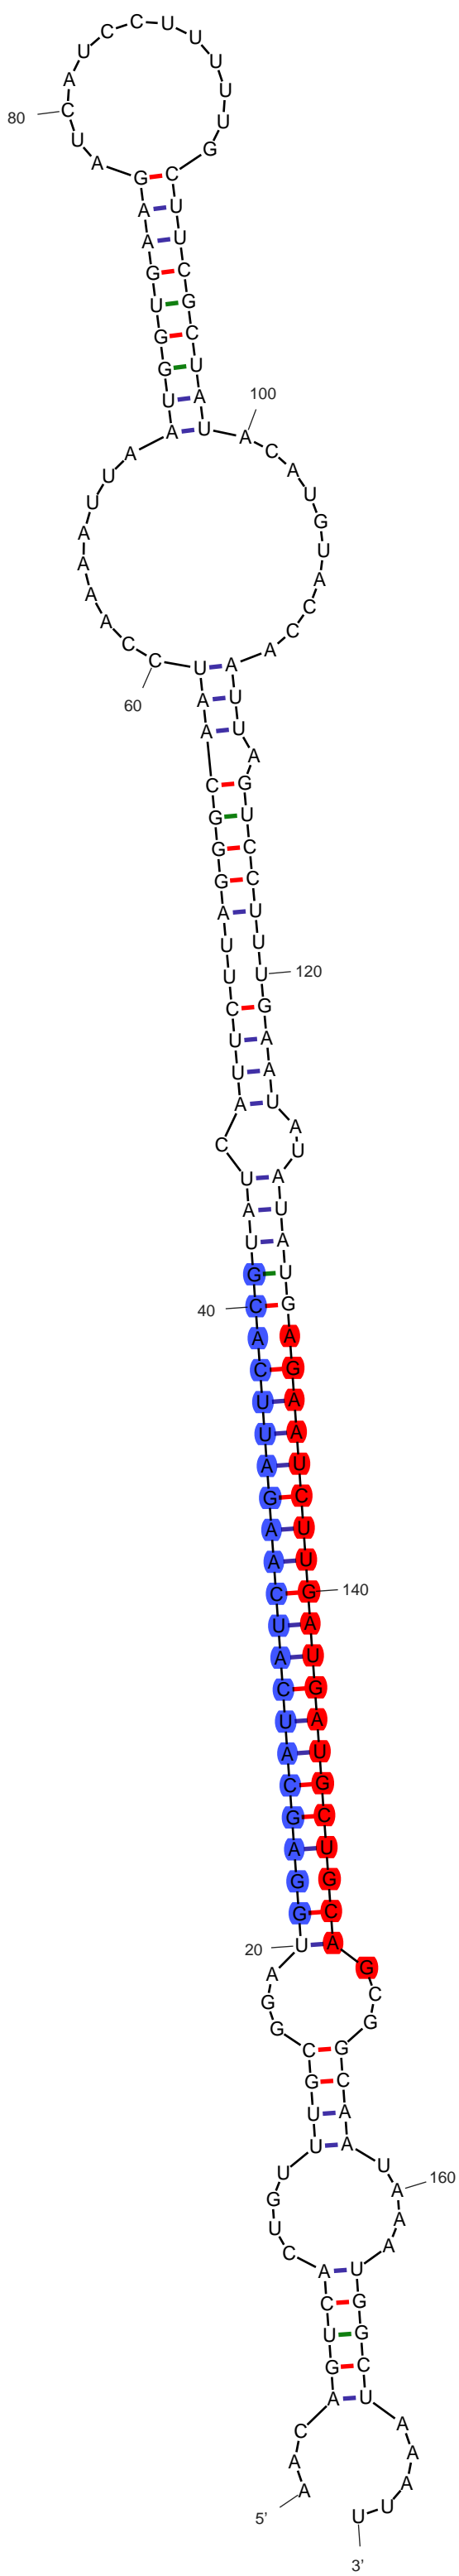

$dG = -60.00$  [Initially -60.00] 86-MIR172

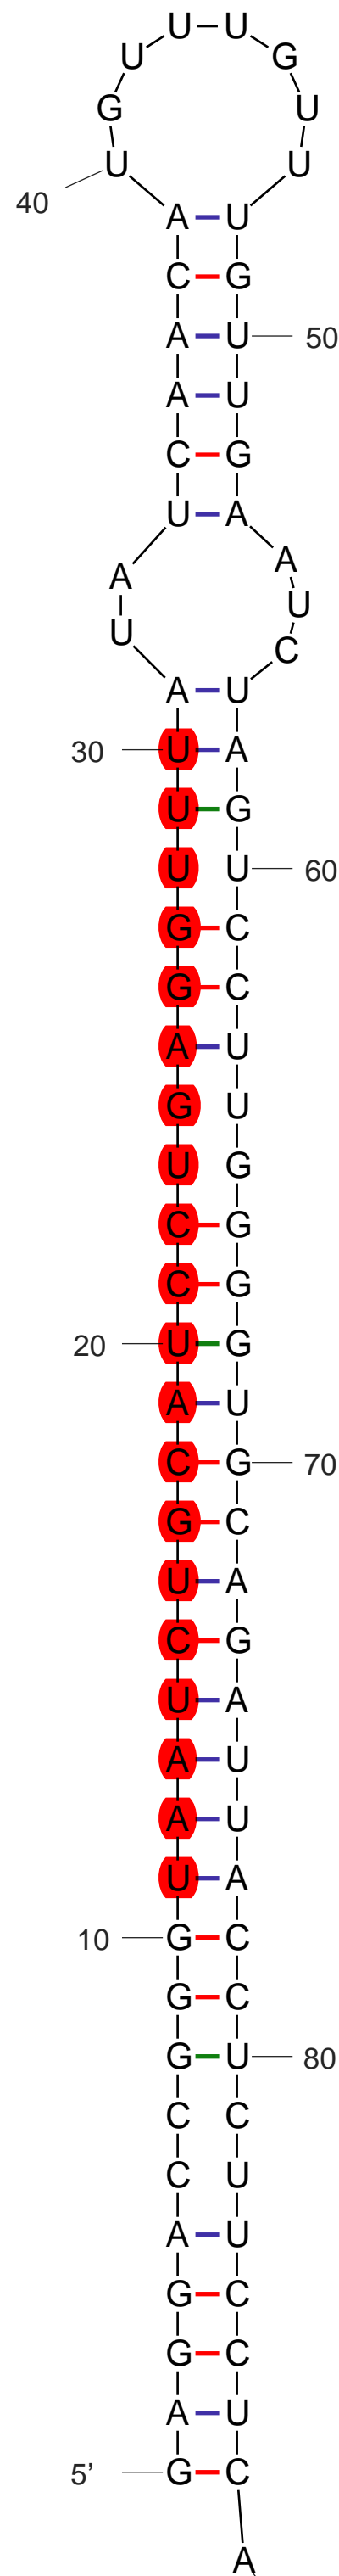

$dG = -49.80$  [Initially  $-49.80$ ] 87-MIR2111

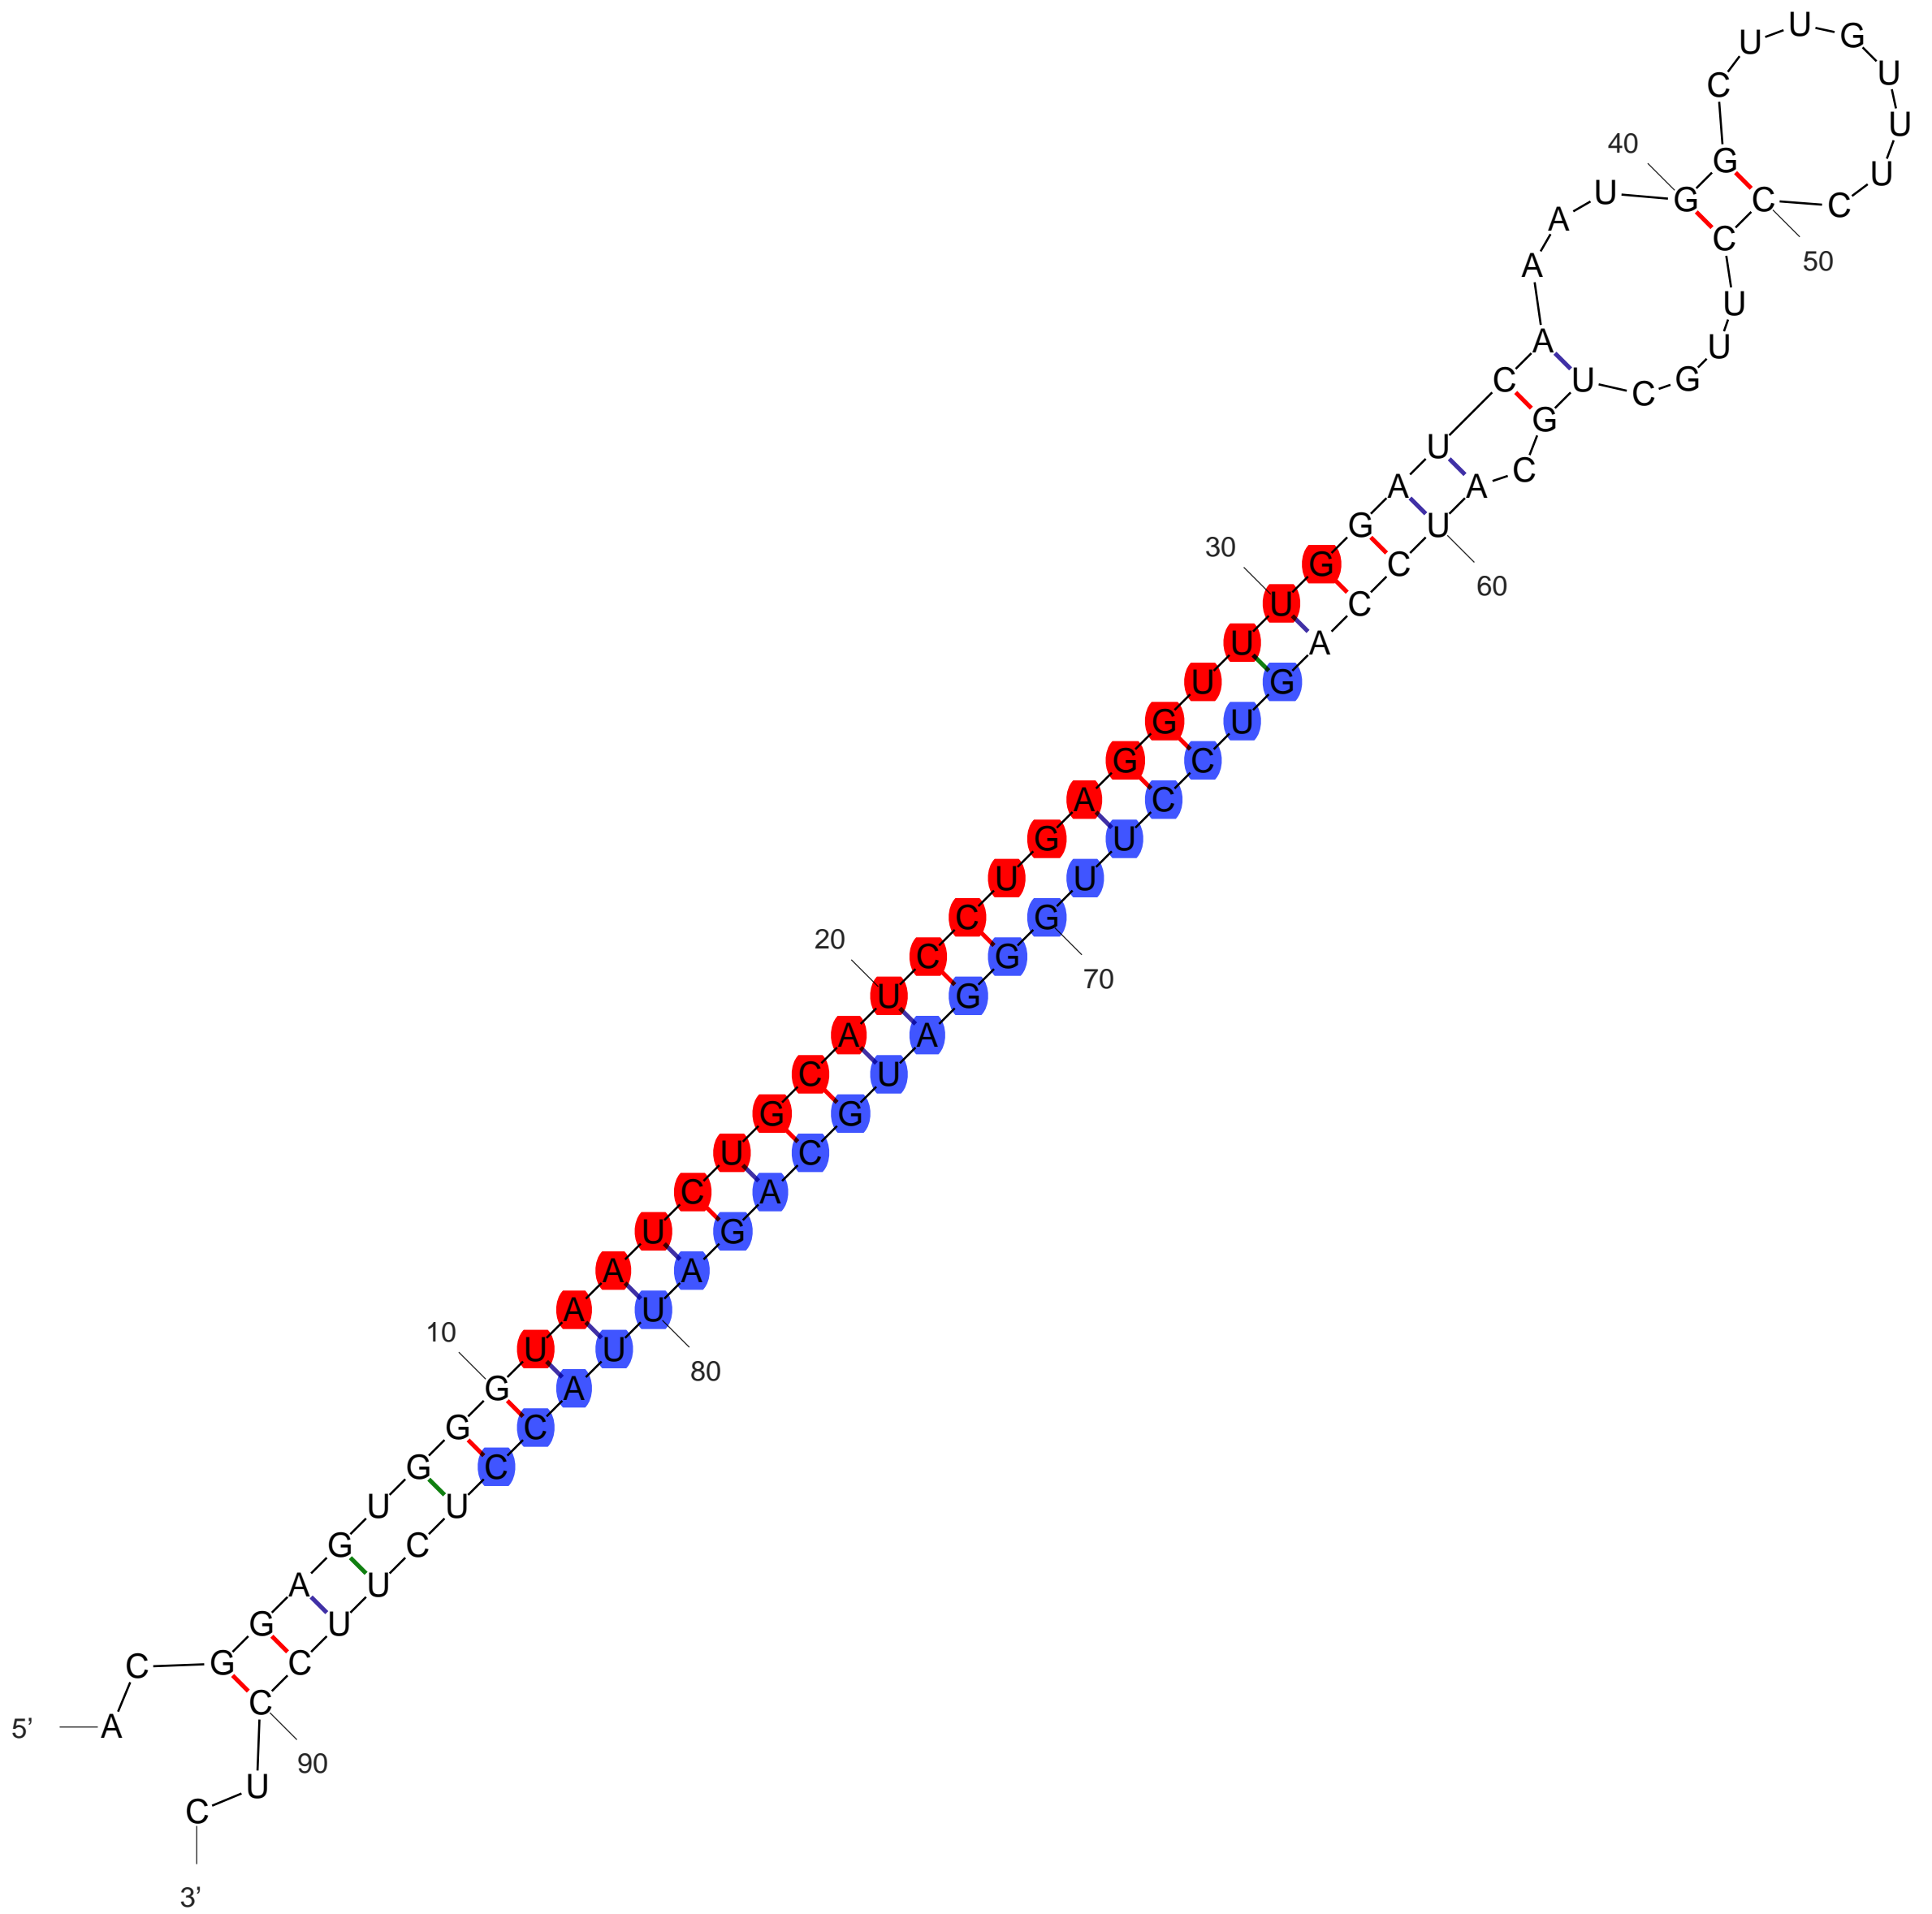

$dG = -49.60$  [Initially -49.60] 88-MIR2111

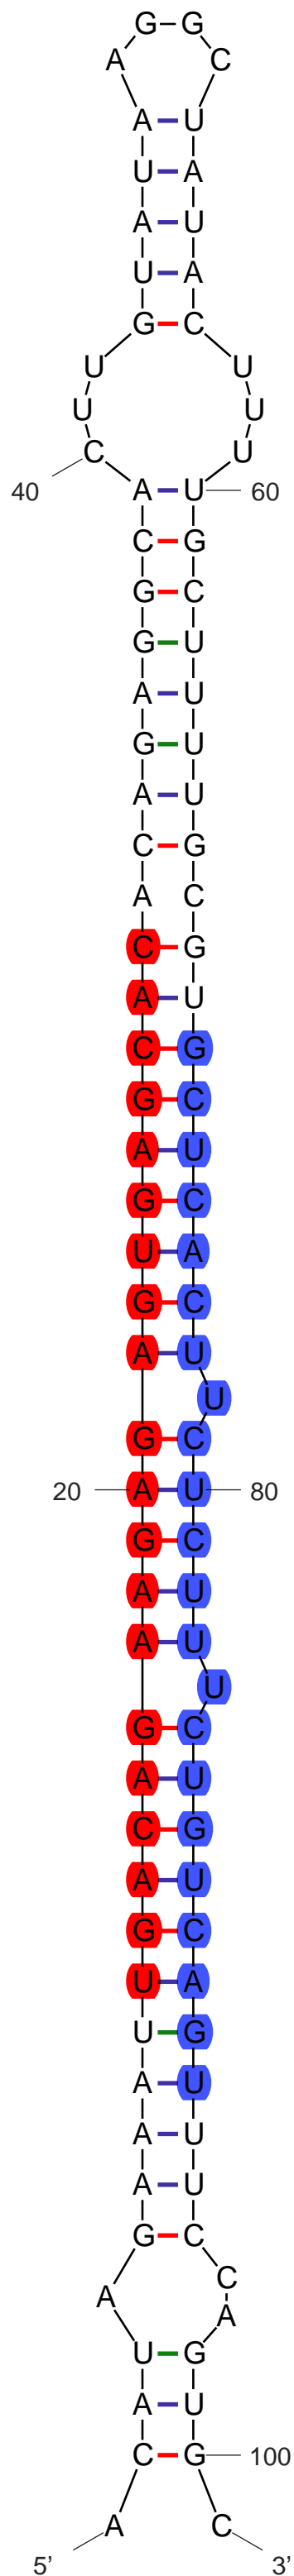

$dG = -53.30$  [Initially -53.30] 8-MIR156-[tcc-MIR156g MI0017459]







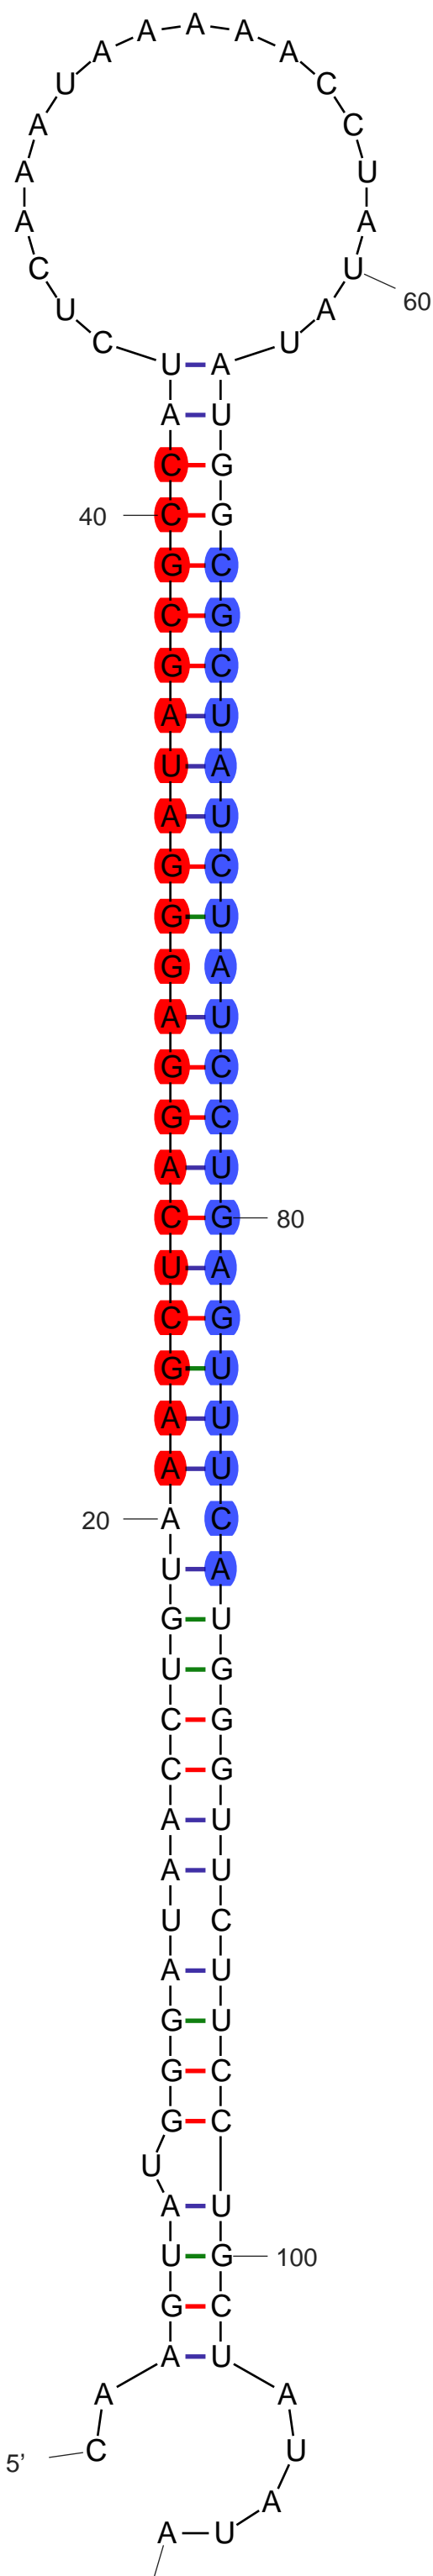

$dG = -50.90$  [Initially -50.90] 95-MIR390

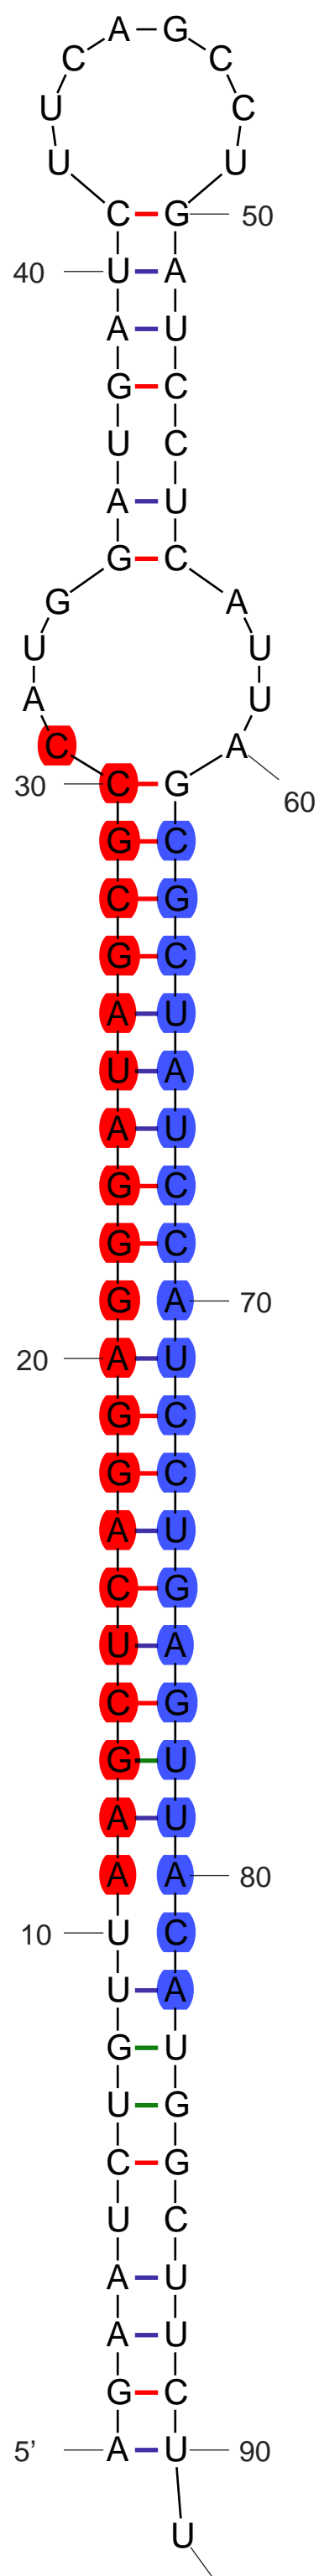

$dG = -41.90$  [Initially  $-41.90$ ] 96-MIR390

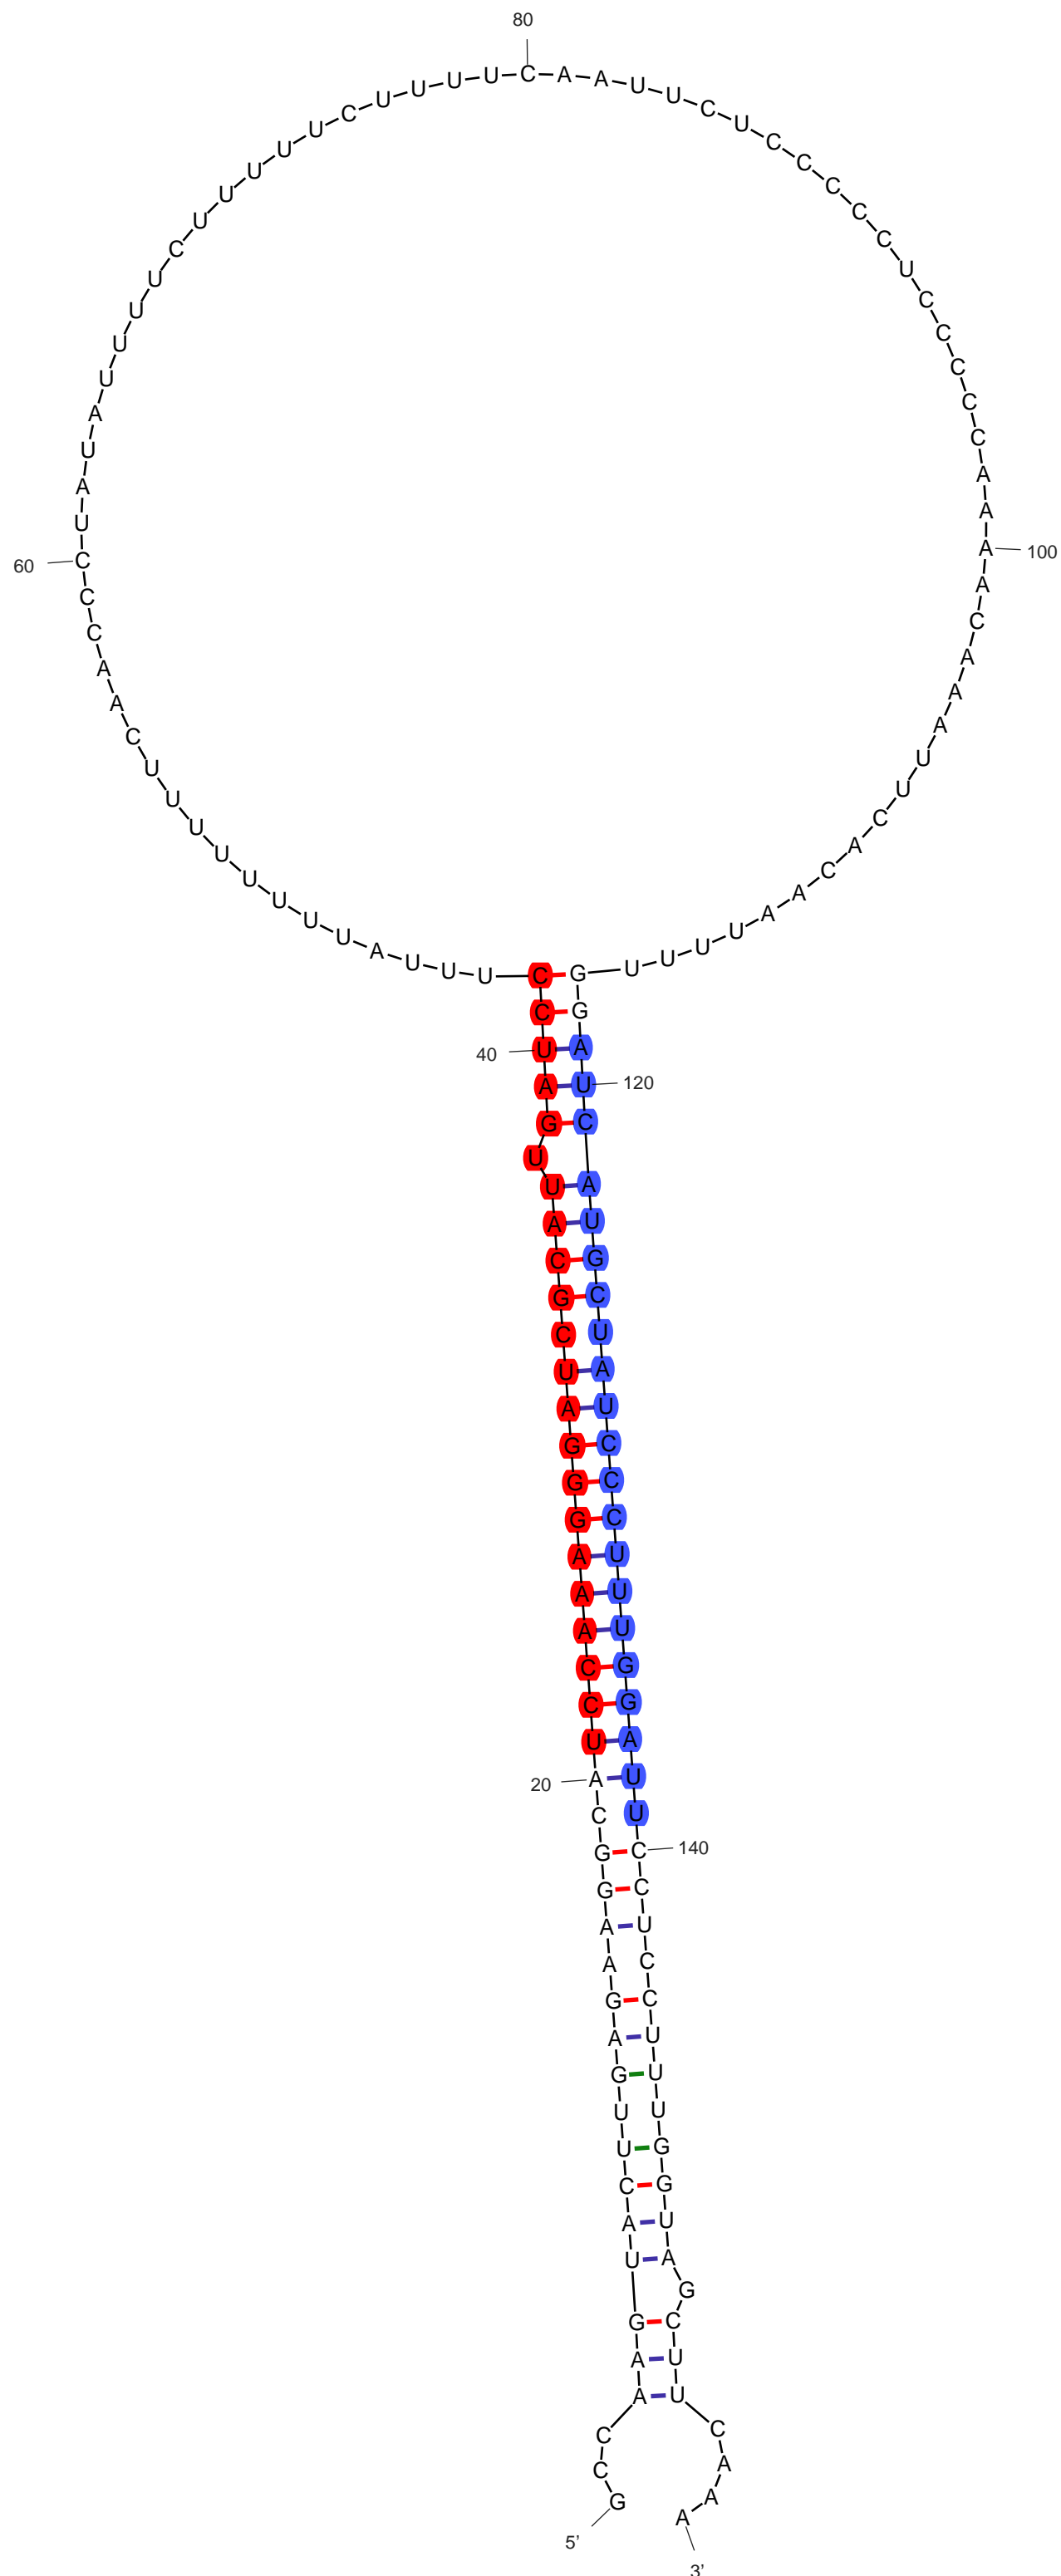

$dG = -41.03$  [Initially  $-41.02$ ] 97-MIR393

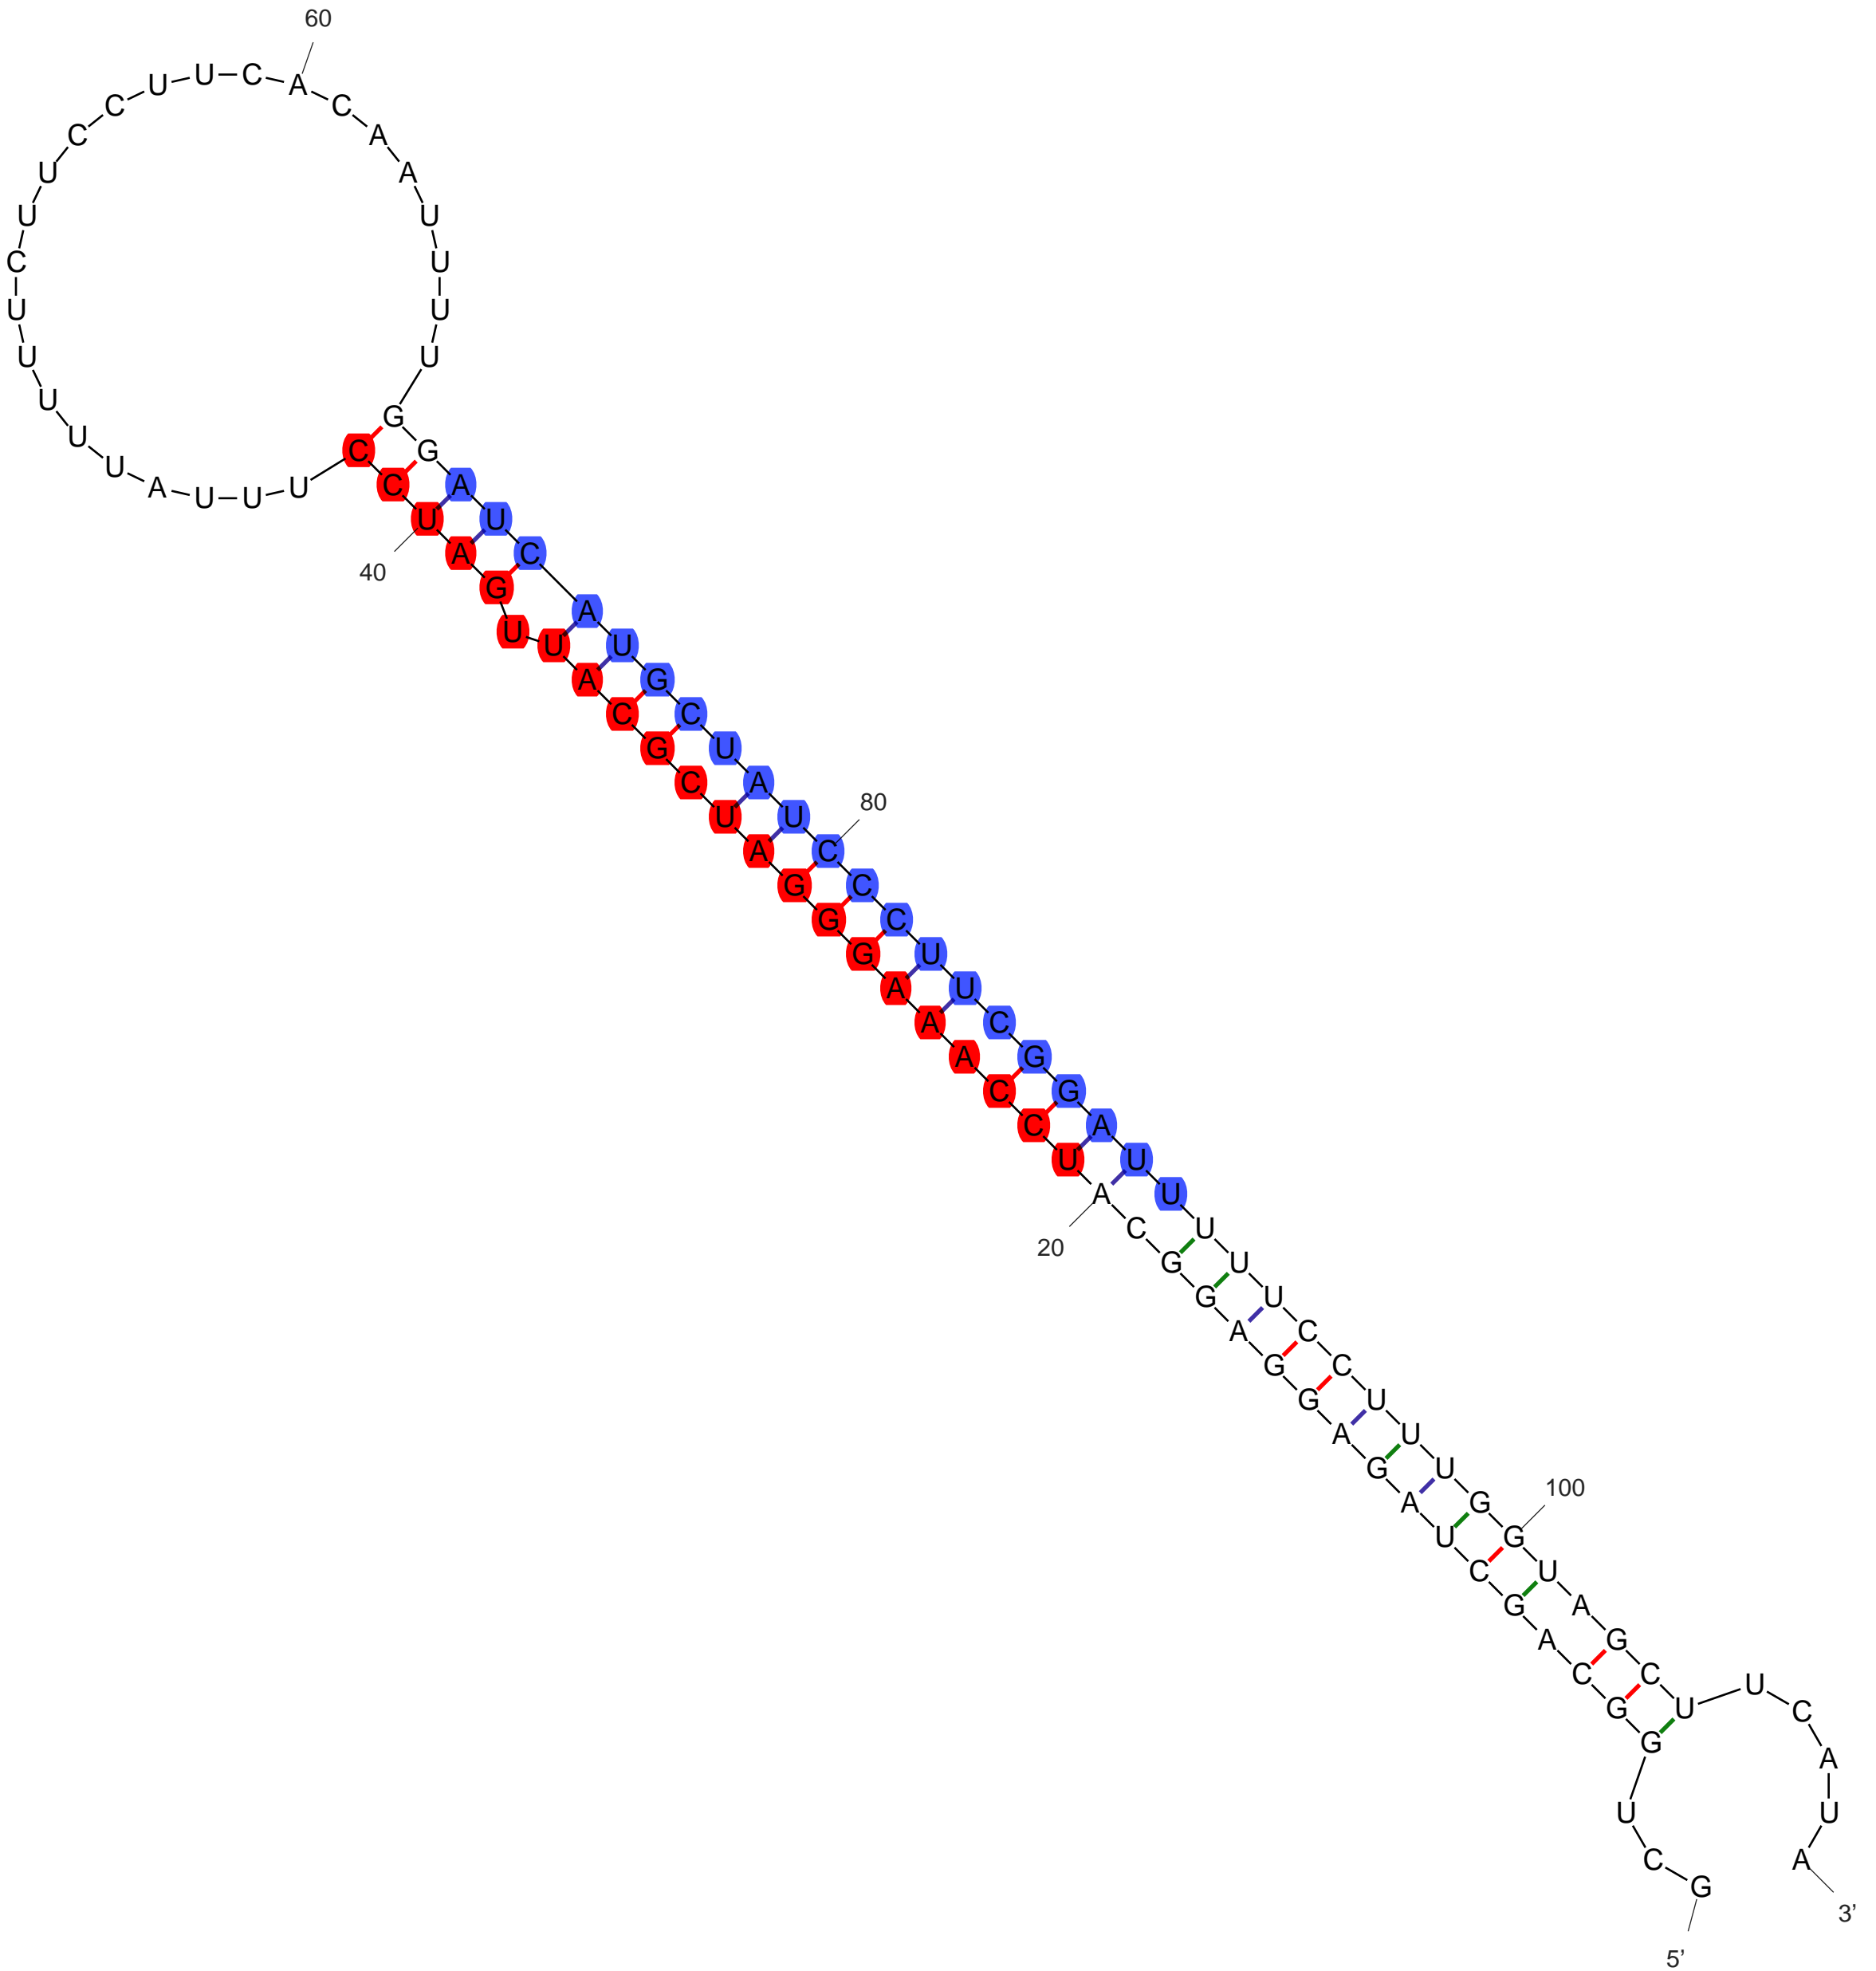

$dG = -45.20$  [Initially -45.20] 99-MIR393
